# Supplementary material for: Post-transcriptional gene regulation by microRNAs during barley malting
Source: Research Square preprint supplement (doi:10.21203/rs.3.rs-7190346/v1), 2025-07-28

## Figure S6

Expression across the five malting stages of the 64 genes with CleaveLand4 category 0 predicted slice sites. Expression is represented as the mean transcripts per million (TPM)  $\pm$  standard deviation,  $n = 3$ . The normalized read count data are publicly available at NCBI's Gene Expression Omnibus through GEO Series accession number GSE 295574 (<https://www.ncbi.nlm.nih.gov/geo/query/acc.cgi?acc=GSE295574>).

expression of CleaveLand4 category 0 predicted targets of miRNA-mediated slicing

page 1 of 6

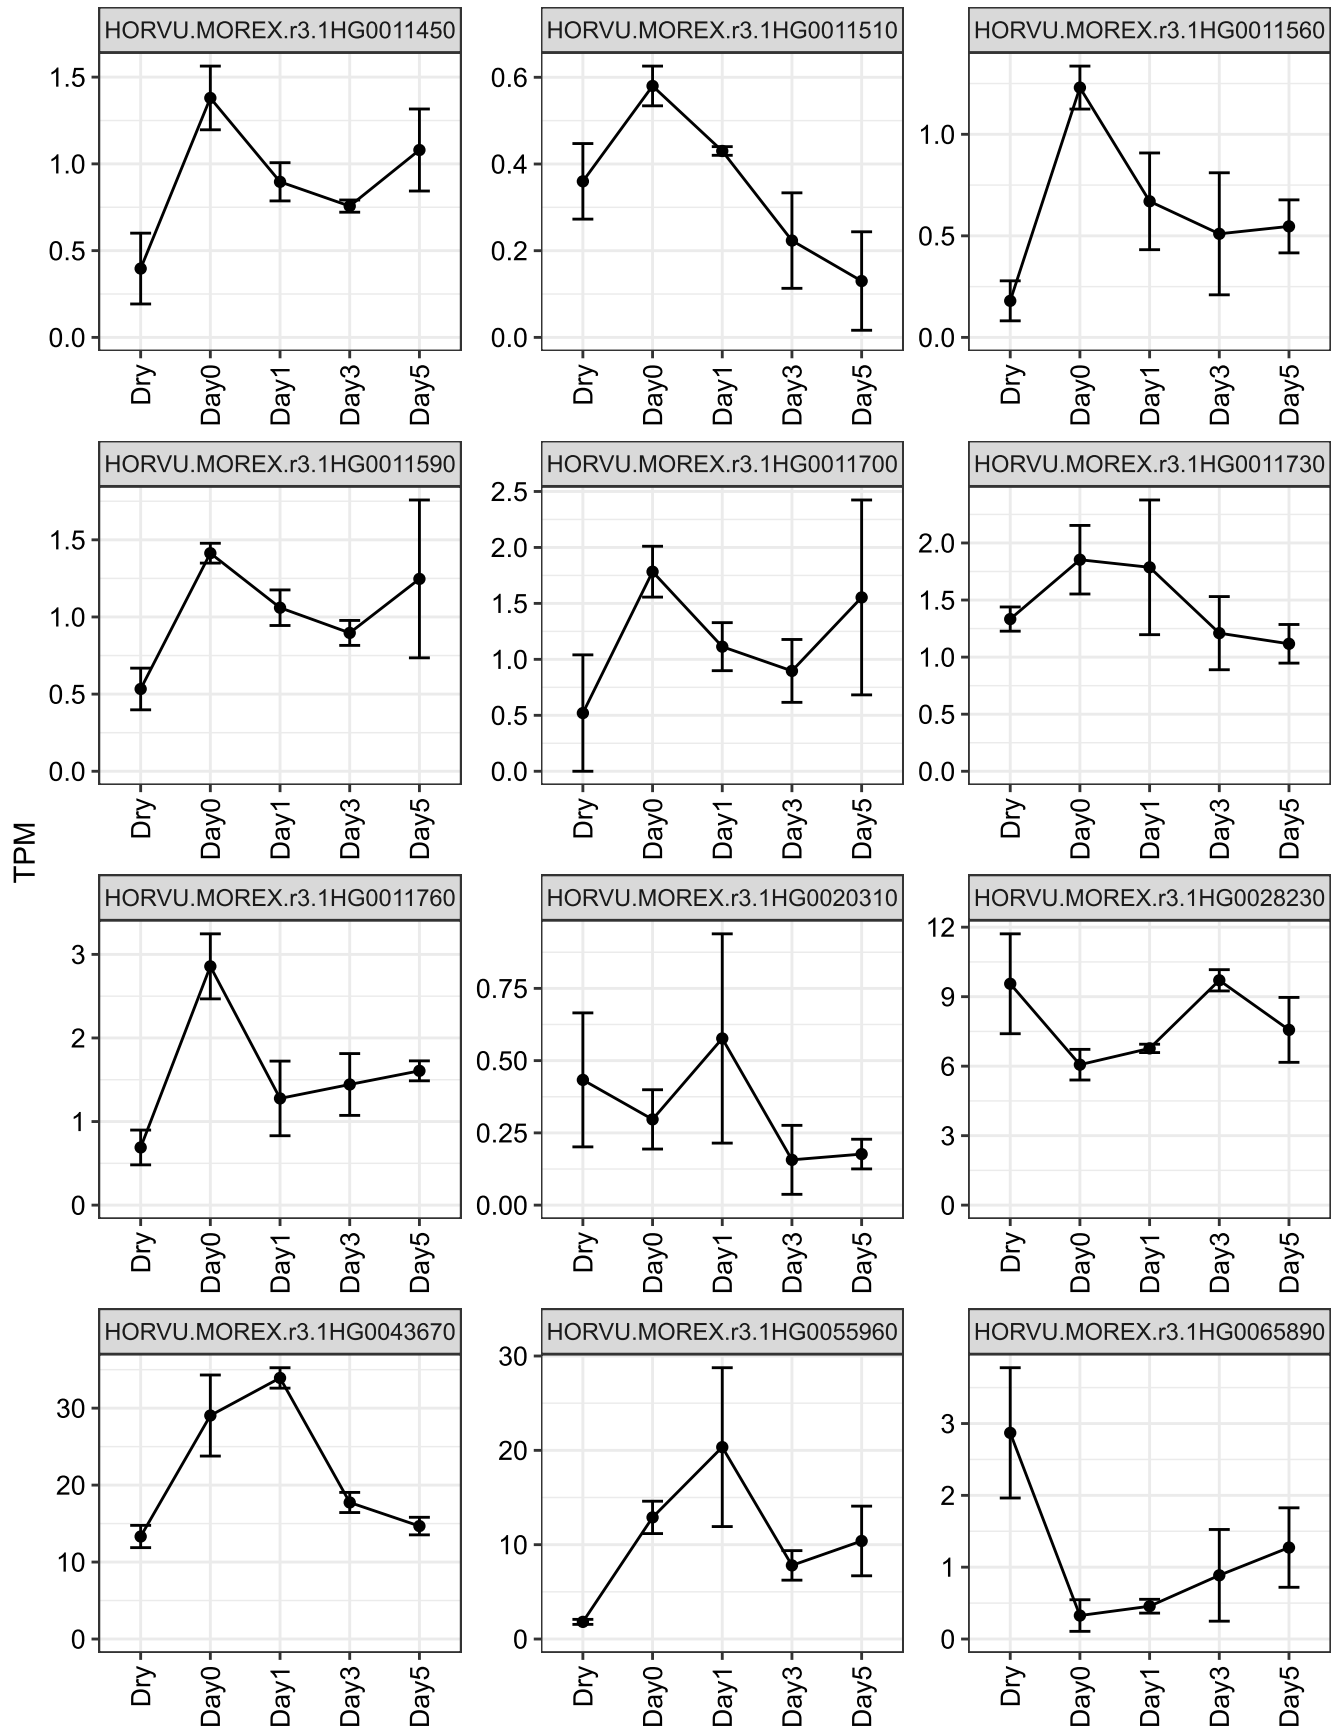

expression of CleaveLand4 category 0 predicted targets of miRNA-mediated slicing  
page 2 of 6

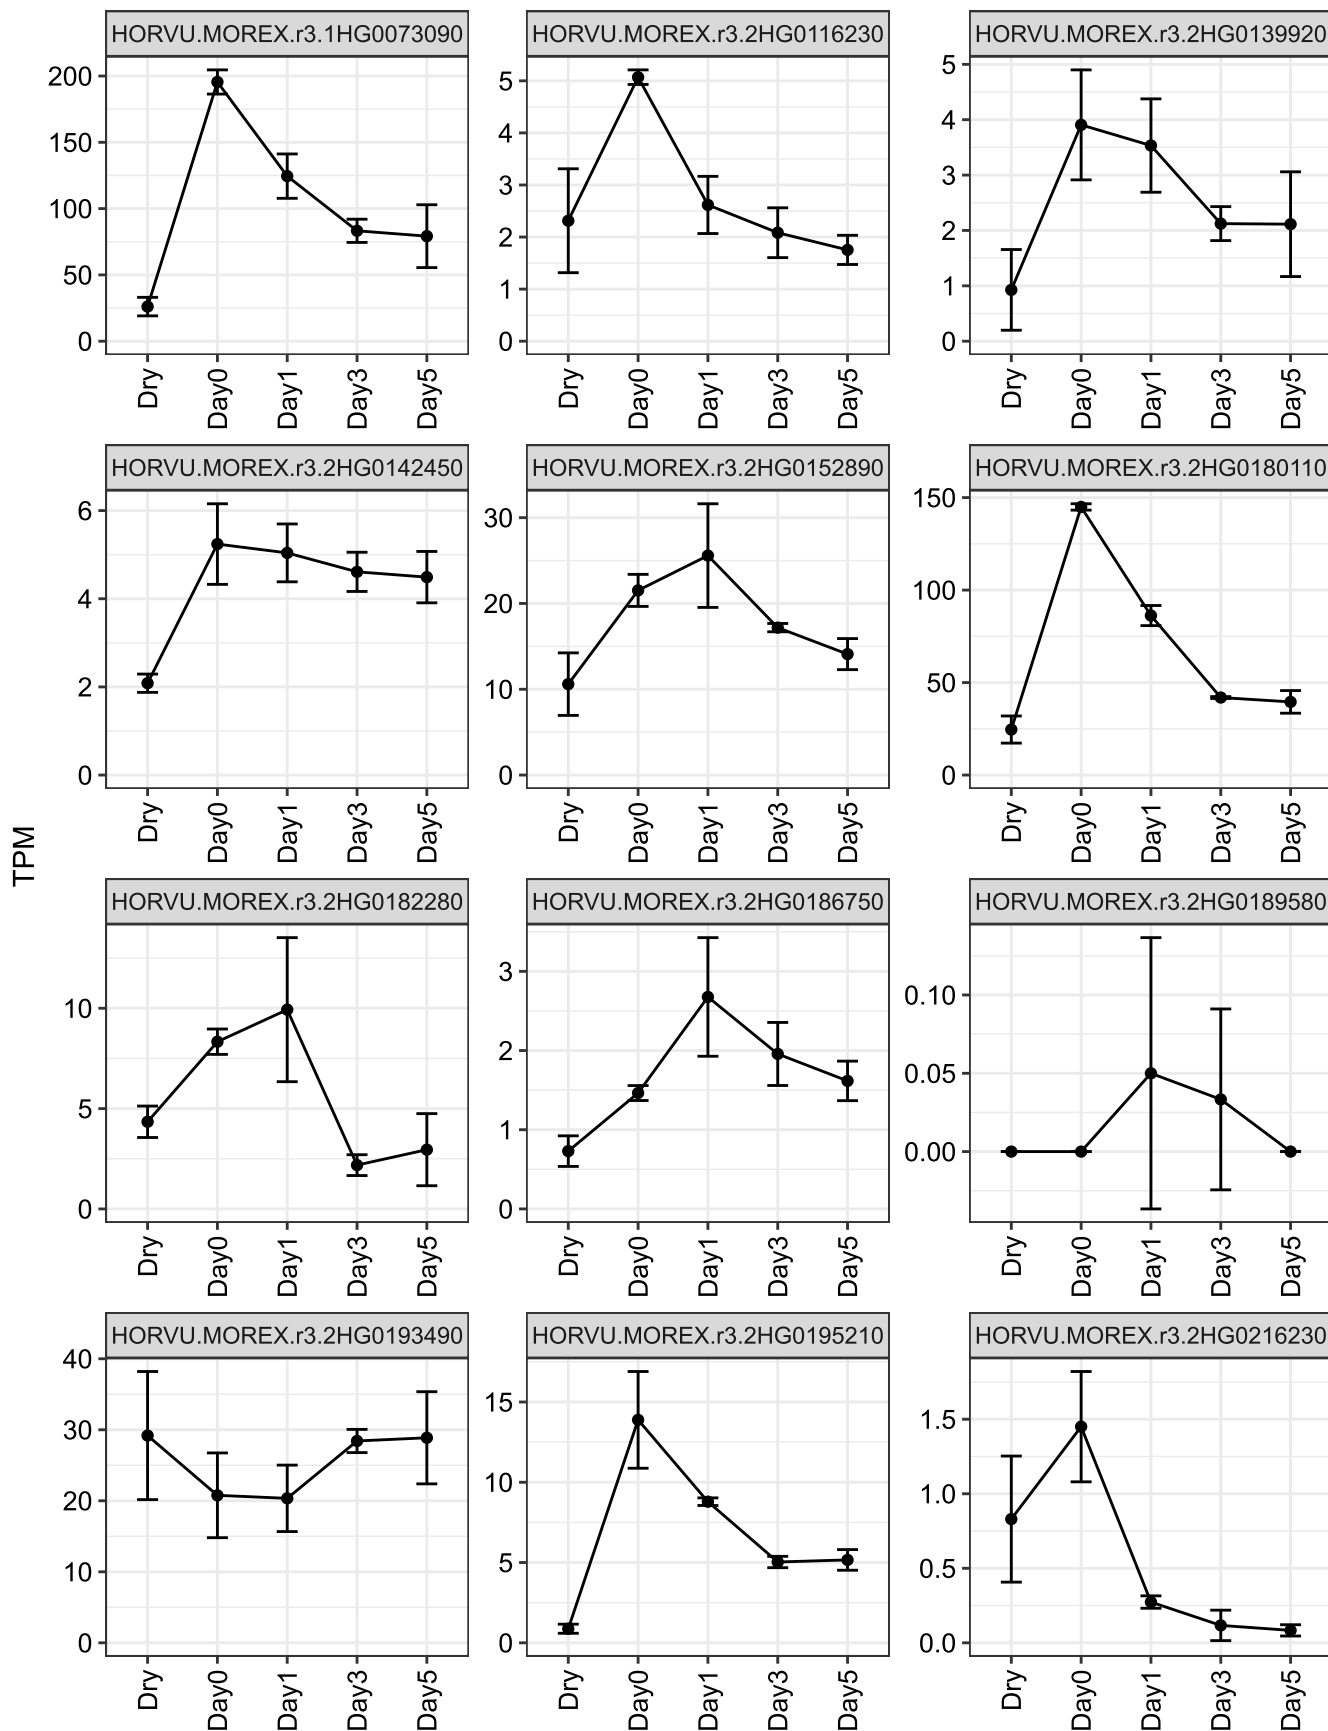

expression of CleaveLand4 category 0 predicted targets of miRNA-mediated slicing  
page 3 of 6

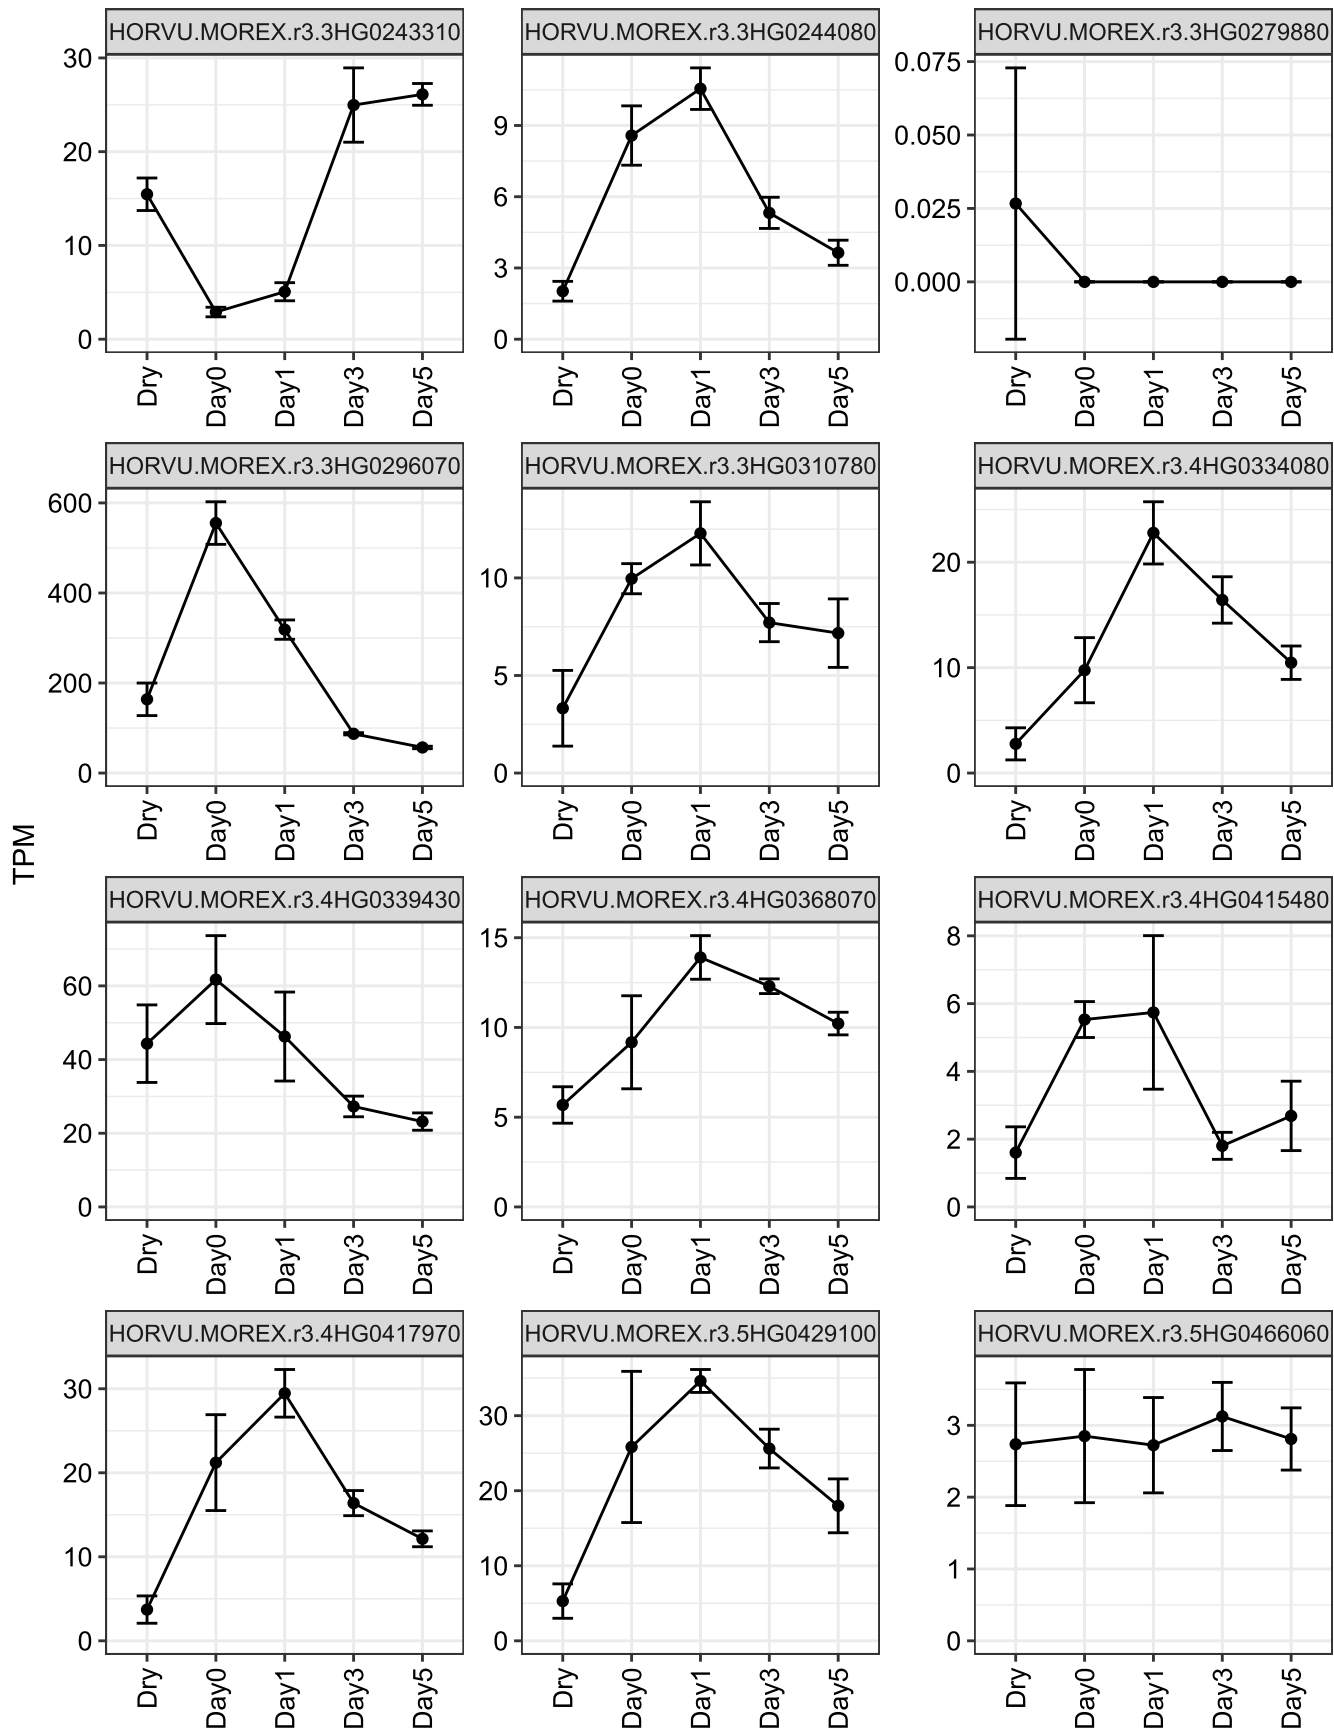

expression of CleaveLand4 category 0 predicted targets of miRNA-mediated slicing

page 4 of 6

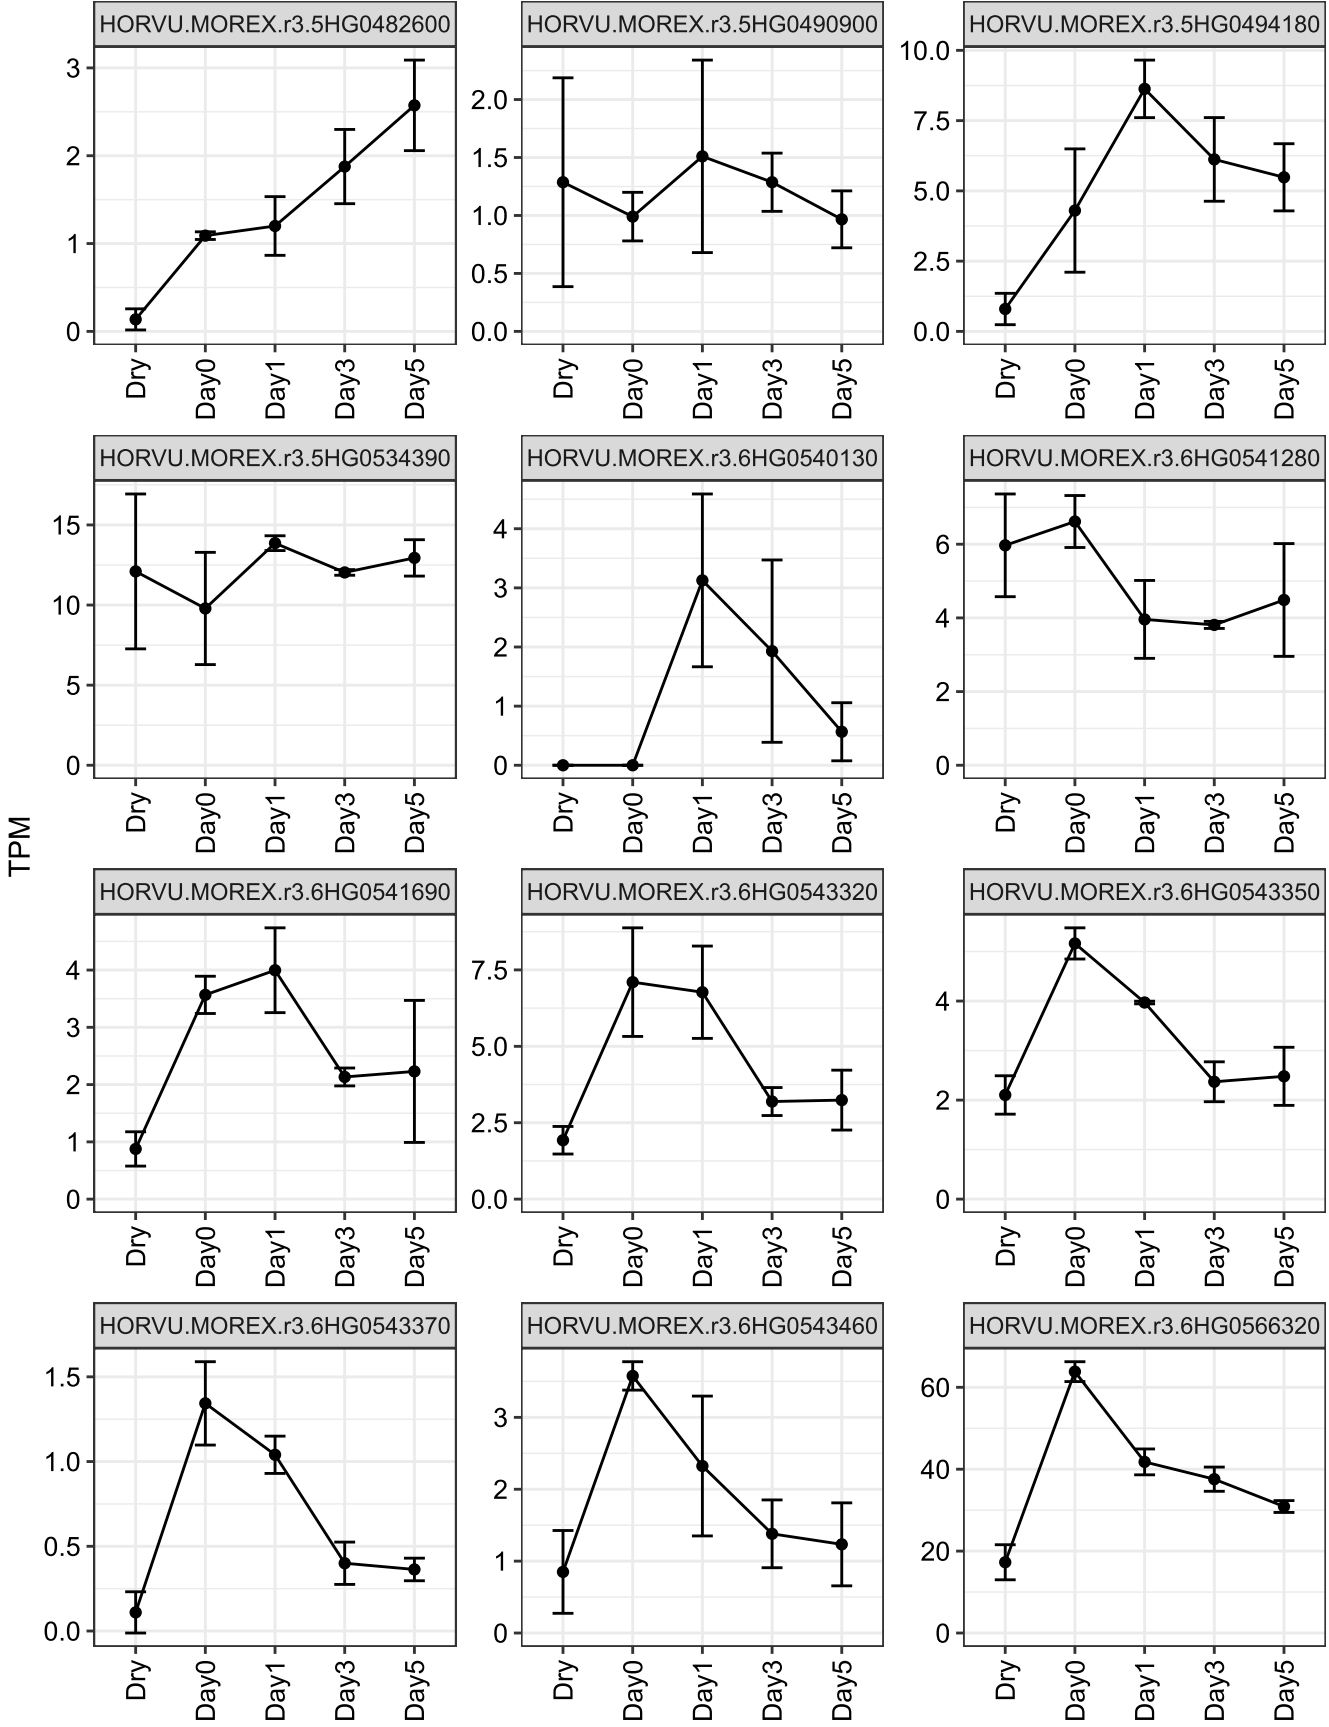

expression of CleaveLand4 category 0 predicted targets of miRNA-mediated slicing

page 5 of 6

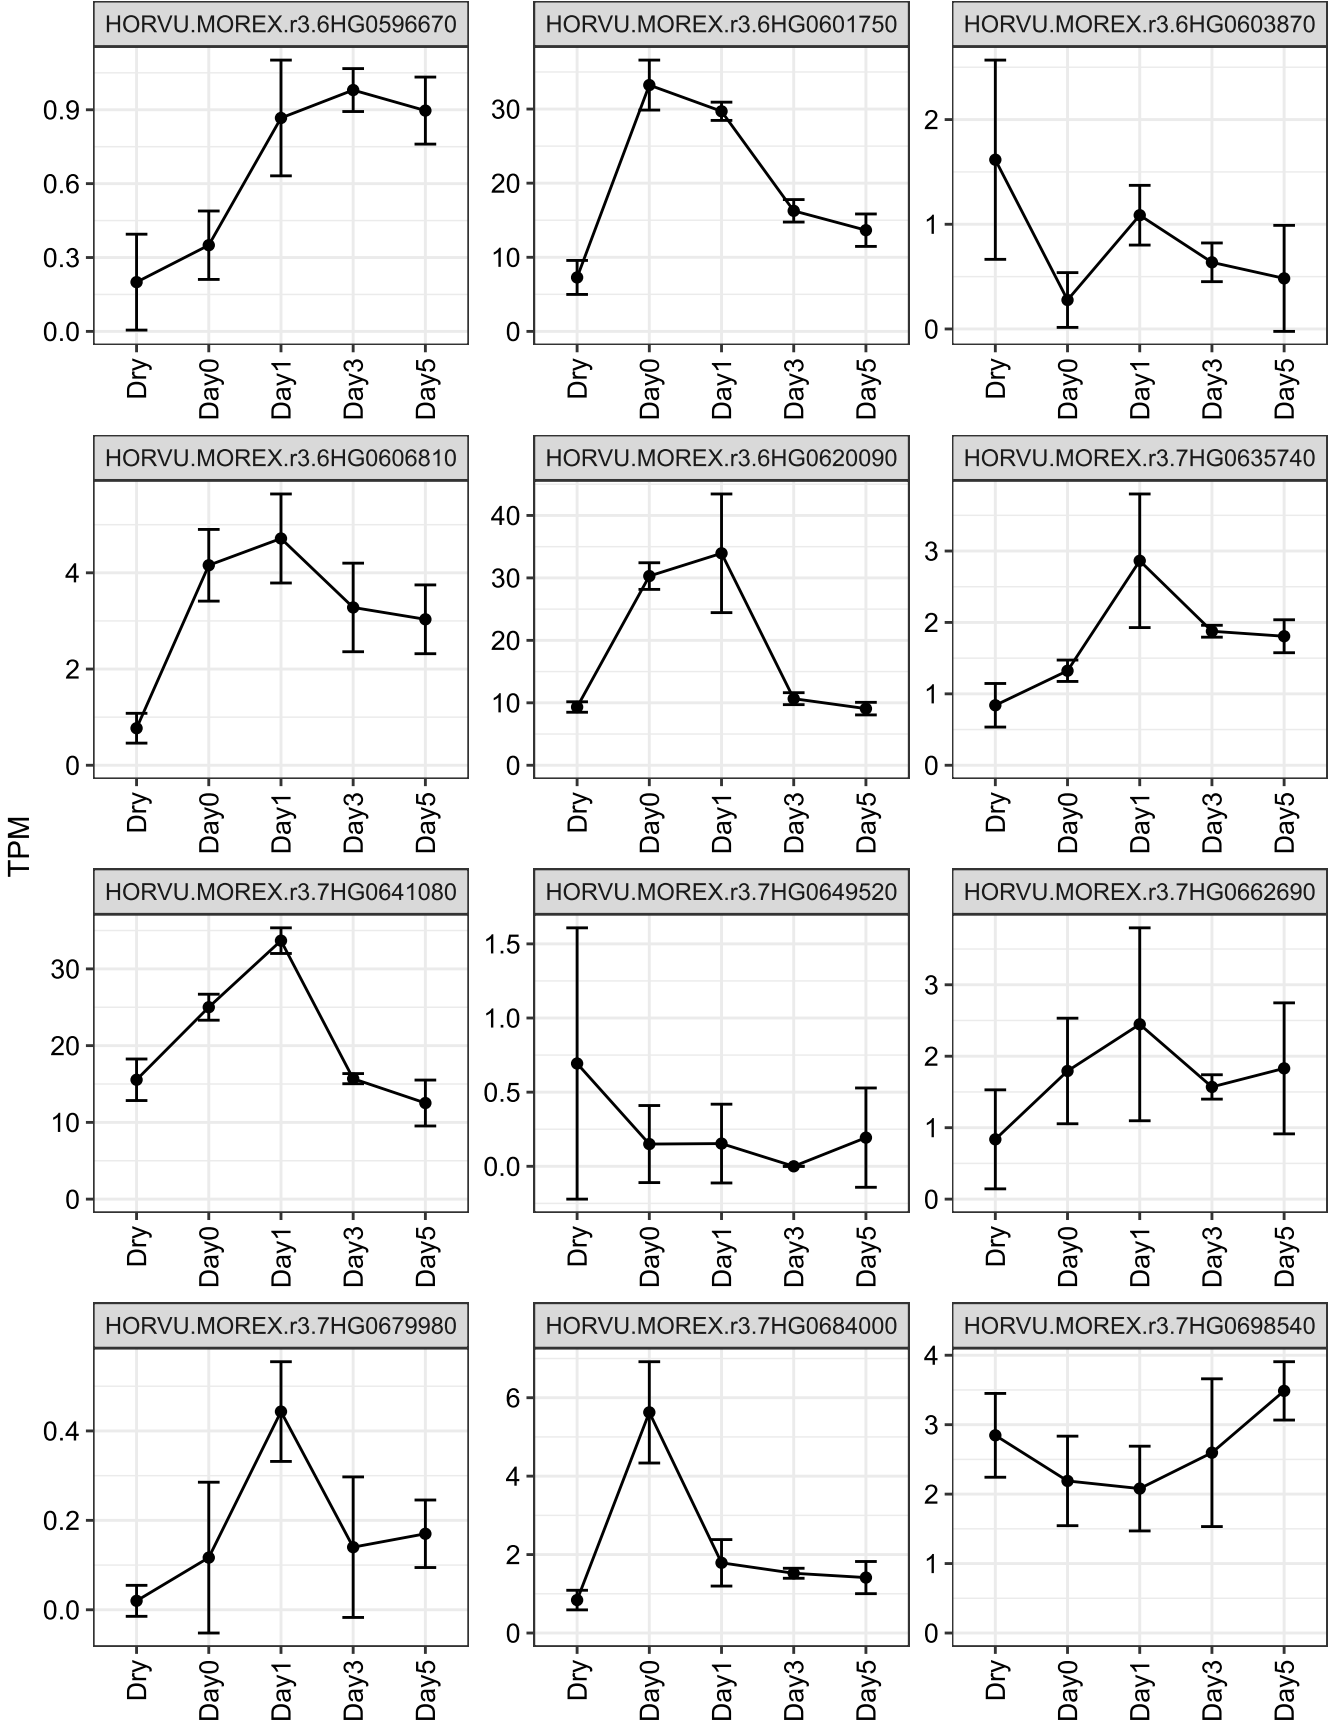

expression of CleaveLand4 category 0 predicted targets of miRNA-mediated slicing

page 6 of 6

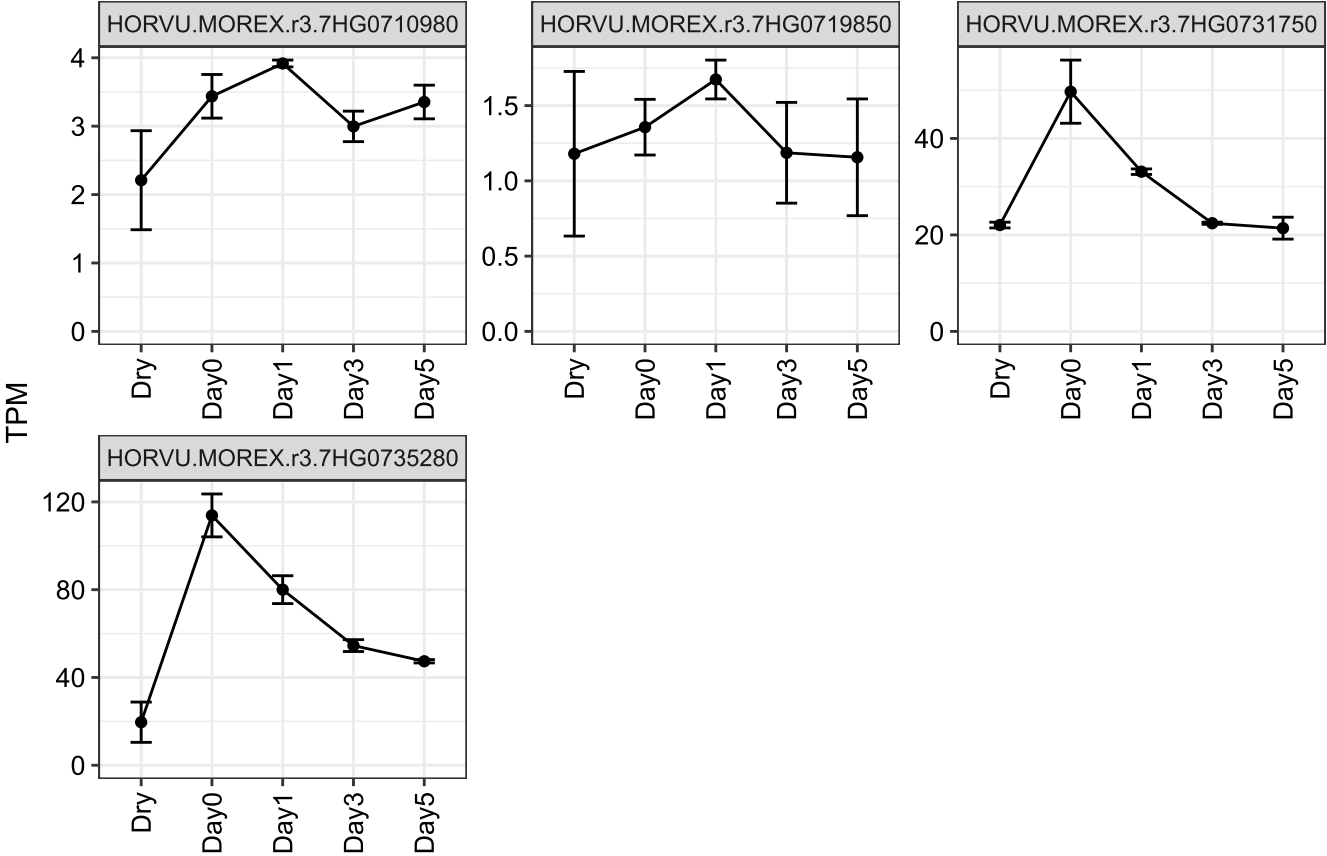

Supplement: Supplementary file 1 [file c24427a16aaf70566a194015.pdf]
