# Supplementary material for: Post-transcriptional gene regulation by microRNAs during barley malting
Source: Research Square preprint supplement (doi:10.21203/rs.3.rs-7190346/v1), 2025-07-28
Supplement: Supplementary file 1 [file ec12088d9bf5254f8bbb8e2e.xlsx]

## Sheet: Captions
Table S1	information describing the 33 loci identified by Shortstack as expressing miRNA during malting time course
majorArm	sepcifies which arm of the putative hairpin has more aligned sRNA reads, -5p or -3p
Table S2	33 MIR loci expression
nCts	median of ratios normalized reads, sum of miRNA-5p and miRNA-3p
Table S3	CleaveLand4 output for all category 0 and category 1 slice sites identified in the degradome libraries
Query	putative targeting miRNA; MIR family (if known) and shortstack cluster ID
type	MIR family (if known) and hairpin arm position (-5p or -3p)
clusterName	shortstack cluster ID(s)
seq	sequence of query miRNA
degradome	degradome library in which the putative slice-site was identified
SiteID	"[transcript]:[slice_site]"
transcriptID	sliced mRNA transcript
TStart	One-based start position of the alignment within the transcript
TStop	One-based stop position of the alignment within the transcript
TSlice	One-based position of the alignment opposite position 10 of the query
MFEperfect	Minimum free energy of a perfectly matched site (approximate)
MFEsite	Minimum free energy of the alignment in question
MFEratio	MFEsite / MFEperfect
AllenScore	Penalty score calculated per Allen et al. (2005) Cell, 121:207-221 [PMID: 15851028].
Paired	String representing paired positions in the query and transcript. The format is Query5'-Query3',Transcript3'-Transcript5'. Positions are one-based. Discrete blocks of pairing are separated by ;
Unpaired	String representing unpaired positions in the query and transcript. The format is Query5'-Query3',Transcript3'-Transcript5'[code]. Possible codes are "UP5" (Unpaired region at 5' end of query), "UP3" (Unpaired region at 3' end of query), "SIL" (symmetric internal loop), "AILt" (asymmetric internal loop with more unpaired nts on the transcript side), "AILq" (asymmetric internal loop with more unpa…
Structure	Structure: Aligned secondary structure. The region before the "&" represents the transcript, 5'-3', while the region after the "&" represents the query, 5'-3'. "(" represents a transcript base that is paired, ")" represents a query based that is paired, "." represents an unpaired base, and "-" represents a gap inserted to facilitate alignment.
Sequence	Aligned sequence. The region before the "&" represents the transcript, 5'-3', while the region after the "&" represents the query, 5'-3'.
DegradomeCategory	Cateogry 0: >1 read, equal to the maximum on the transcript, when there is just 1 position at the the maximum value; Cateogry 1: >1 read, equal to the maximum on the transcript, when there is >1 position at maximum value
DegradomePval	p-value for this degradome hit
Table S4	malting transcriptome
geneIDs correspond to Morex v3
DOI=https://doi.org/10.1016/j.ygeno.2021.07.011
transcripts per million (TPM)

## Sheet: Table S1
locusID	clusterID	chrom	start	end	locusLength	reads	distinctSeq	strand	miRNA-5p_featureSeq	miRNA-3p_featureSeq	majorArm	MIR_family	known_miRNAs
1H:20913602-20913704	Cluster_68	1H	20913602	20913704	103	209	18	+	AAACGAUAUCACCGCCCUACA	GAGGGCGGCGAUAACAUUUUC	-5p	unknown	NA
1H:335384361-335384501	Cluster_426	1H	335384361	335384501	141	310702	233	+	GGAAUGUUGUCUGGUUCAAGG	UCGGACCAGGCUUCAUUCCCC	-3p	miR166	osa-miR166a-5p_zma-miR166bd-5p;hvu-miR166abc_osa-miR166abcd-3p_zma-miR166a-3p_vvi-miR166d_atr-miR166cd;zma-miR166bdgi-3p
1H:367870096-367870239	Cluster_456	1H	367870096	367870239	144	197	7	+	UAUUGGCUCGGCUCACUCAGG	UGAUUGAGCCGCGCCAAUAUC	-5p	miR171	atr-miR171c
2H:192275276-192275527	Cluster_1155	2H	192275276	192275527	252	311	22	-	ACAAAGAUGUCUGUCAGGUCG	ACCUCACAUGCGUCAUUGUUA	-5p	unknown	NA
2H:544572793-544572972	Cluster_1545	2H	544572793	544572972	180	881	18	-	UUUUGUUGGUUGUCAUCUAACC	UUAGAUGACCAUCAGCAAACA	-5p	miR827	NA
2H:547101851-547101982	Cluster_1557	2H	547101851	547101982	132	2114	50	-	UGACAGAAGAGAGUGAGCAC	GCUCACUGCUCUAUCUGUCACC	-5p	miR156	zma-miR156l-3p;hvu-miR156ab;osa-miR156bcfghj-5p_zma-miR156defgil-5p_aly-miR156abcd-5p
2H:557132909-557133014	Cluster_1580	2H	557132909	557133014	106	96	15	-	ACCCACACCGGUGAUCCCGGCC	CCGGGCGUCAUGGCGGGGGAG	-5p	unknown	NA
2H:610738330-610738453	Cluster_1682	2H	610738330	610738453	124	50	5	+	CGGUAUUGGUGCGGUUCAAUC	UUGAGCCGUGCCAAUAUCACG	-3p	miR171	zma-miR171b-3p;aly-miR171bc-3p
2H:640670230-640670380	Cluster_1777	2H	640670230	640670380	151	92	6	+	UCCGUGGCGUUUCCGCUUAAC	UAAGCAGAAACGCCACGGACU	-3p	unknown	NA
2H:648439735-648439874	Cluster_1803	2H	648439735	648439874	140	19369	115	+	UCCACAGGCUUUCUUGAACUG	GUUCAAGAAAGCCCAUGGAAA	-5p	miR396	osa-miR396f-5p;osa-miR396e-5p;osa-miR396e-3p
2H:655580443-655580564	Cluster_1822	2H	655580443	655580564	122	207	14	+	UUCCAAAGGGAUCGCAUUGAU	CAGUGCGAUCCCUCUGGAAUU	-5p	miR393	NA
3H:11949359-11949572	Cluster_1875	3H	11949359	11949572	214	9116	152	-	GAGCUCCUAUCAUUCCAAUGA	UUUGGAUUGAAGGGAGCUCUG	-3p	miR159	hvu-miR159ab_zma-miR159af-3p_tae-miR159a;zma-miR159a-5p
3H:49404011-49404141	Cluster_1973	3H	49404011	49404141	131	883	23	-	UGACAGAAGAGAGUGAGCAC	GCUCACUGCUCUAUCUGUCAGC	-5p	miR156	osa-miR156bcfghj-5p_zma-miR156defgil-5p_aly-miR156abcd-5p
3H:121156063-121156278	Cluster_2046	3H	121156063	121156278	216	30794	180	+	AGAGCGUCCUUCAGUCCACUC	UUGGACUGAAGGGUGCUCCCU	-3p	miR319	zma-miR319b-5p;zma-miR319b-3p
3H:567840082-567840213	Cluster_2558	3H	567840082	567840213	132	227	20	+	UUAAAUUUCUCCAUAGCAUCA	GUGCUAUGGAUAAAUUUAACC	-5p	unknown	NA
4H:558076938-558077060	Cluster_3388	4H	558076938	558077060	123	307	23	+	CCAGUUUCAAGGUUUCAAAGC	UUUGGCACCUUGAAACUGGGA	-3p	miR5051	hvu-miR5051
4H:559503416-559503565	Cluster_3392	4H	559503416	559503565	150	1841	28	+	UGAAGCUGCCAGCAUGAUCUGA	AGGUCAUGUGGCAGCUUCAUU	-5p	miR167	osa-miR167egi-5p_zma-miR167ehij-5p
4H:561565175-561565321	Cluster_3396	4H	561565175	561565321	147	3156	29	+	GGAAUGUUGUCUGGUUGGAGA	UCGGACCAGGCUUCAUUCCCC	-3p	miR166	zma-miR166g-5p;hvu-miR166abc_osa-miR166abcd-3p_zma-miR166a-3p_vvi-miR166d_atr-miR166cd;zma-miR166bdgi-3p
4H:584947356-584947473	Cluster_3461	4H	584947356	584947473	118	231	14	-	UGUUGGCUCGACUCACUCAGA	UGAUUGAGCCGUGCCAAUAUC	-3p	miR171	hvu-miR171-3p_osa-miR171cde-3p_zma-miR171de-3p_tae-miR171a;hvu-miR171-5p
5H:42174025-42174141	Cluster_3623	5H	42174025	42174141	117	3470	46	-	UGAAGCUGCCAGCAUGAUCUGA	AGGUCAUGCUGGAGUUUCAUC	-5p	miR167	osa-miR167egi-5p_zma-miR167ehij-5p
5H:42176655-42176771	Cluster_3624	5H	42176655	42176771	117	116	6	-	UGAAGCUGCCAGCAUGAUCUA	GAUCAUGACUGACAGCCUCAUU	-5p	miR167	osa-miR167a-5p_zma-miR167c-5p_aly-miR167a-5p
5H:86631138-86631245	Cluster_3664	5H	86631138	86631245	108	282	25	+	UGUUUCCGUCUACCUCCAUGG	AUGGAGGUAGACGGAAACGGA	-3p	unknown	NA
5H:457063999-457064137	Cluster_4051	5H	457063999	457064137	139	4814	101	+	GGGUUGUUGUCUGGUUCAAGG	UCGGACCAGGCUUCAAUCCCU	-3p	miR166	osa-miR166kl-3p_zma-miR166jkn-3p
5H:525224887-525225018	Cluster_4244	5H	525224887	525225018	132	121	10	-	UGAAGCUGCCAGCAUGAUCU	AUCGUGCUGUGACAGUUUCACU	-3p	miR167	osa-miR167a-5p_zma-miR167c-5p_aly-miR167a-5p
5H:538351996-538352085	Cluster_4290	5H	538351996	538352085	90	461	32	+	UUCGCCGGUGGUGCGUUUCCC	GAAGCGCACUGCCGUCGAAUG	-5p	unknown	NA
6H:34273952-34274061	Cluster_4564	6H	34273952	34274061	110	9475	140	+	UCGCUUGGUGCAGAUCGGGAC	CCCGCCUUGCACCAAGUGAAU	-5p	miR168	hvu-miR168-5p_osa-miR168a-5p_zma-miR168b-5p;hvu-miR168-3p_osa-miR168a-3p
6H:102023630-102023747	Cluster_4660	6H	102023630	102023747	118	7742	134	-	GCGGCUCUGUGGUGUUCAAGC	UUGAACAUCCCAGAGCCACCG	-3p	miR9662	NA
6H:138383247-138383393	Cluster_4715	6H	138383247	138383393	147	6225	83	-	UGAAGCUGCCAGCAUGAUCUGC	AGAUCAUGCUGCAGCUUCAUU	-5p	miR167	tae-miR167c-5p;osa-miR167egi-5p_zma-miR167ehij-5p
6H:355385244-355385372	Cluster_4963	6H	355385244	355385372	129	945	38	+	UGACAGAAGAGAGUGAGCAC	GCUCACUGCUCUUCCUGUCAUC	-5p	miR156	osa-miR156bcfghj-5p_zma-miR156defgil-5p_aly-miR156abcd-5p;hvu-miR156ab
6H:539320108-539320222	Cluster_5234	6H	539320108	539320222	115	154	21	+	CUCGCGAGCAACGGAUGAAUC	UUUCUCCUUUGCUCGAGCAGAG	-5p	miR9660	NA
6H:557666865-557666994	Cluster_5317	6H	557666865	557666994	130	142	13	+	UGACCCUGAGGCACUCAUACCG	GUAUGAGUGUCUCAGGGUCAAA	-5p	miR6201	hvu-miR6201
7H:50567509-50567636	Cluster_5480	7H	50567509	50567636	128	1851	34	+	UUCCACAGCUUUCUUGAACUG	GUUCAAUAAAGCUGUGGGAAA	-5p	miR396	aly-miR396a-5p
7H:592808125-592808250	Cluster_6224	7H	592808125	592808250	126	93	12	+	UGCCUGGCUCCCUGUAUGCCA	GCGUGCAAGGAGCCAAGCAUG	-5p	miR160	osa-miR160abc-5p_zma-miR160bg-5p_atr-miR160;osa-miR160ab-3p_zma-miR160bg-3p

## Sheet: Table S2
MIR_locusID	clusterID	strand	MIR_family	dataType	DryA	DryB	DryC	Day0A	Day0B	Day0C	Day1A	Day1B	Day1C	Day3A	Day3B	Day3C	Day5A	Day5B	Day5C
1H:20913602-20913704	Cluster_68	+	unknown	nCts	10.779	19.4325	2.16423	23.8314	12.4849	6.29564	14.16	20.2918	5.43039	3.06978	4.99044	17.3745	4.61169	22.8948	12.0493
miR166 1H:335384361-335384501	Cluster_426	+	miR166	nCts	20190.6	10371.8	14034	26600.4	17092.3	13324.7	17583.3	24562.5	21303.4	26704.1	11842.3	16045.3	21936.5	17283.5	9815.29
miR171 1H:367870096-367870239	Cluster_456	+	miR171	nCts	3.07971	0	3.24635	4.53931	4.16163	0	11.7186	21.0165	19.9114	12.2791	26.9484	11.583	4.61169	10.4067	8.79272
2H:192275276-192275527	Cluster_1155	-	unknown	nCts	9.23913	3.8865	2.16423	5.67414	7.28285	7.86955	18.0662	22.4659	19.9114	38.3723	33.436	8.68724	16.4703	27.0575	17.2598
miR827 2H:544572793-544572972	Cluster_1545	-	miR827	nCts	12.3188	16.8415	22.7244	27.2359	26.0102	12.5913	68.8468	47.8306	65.1647	27.6281	74.3576	46.332	37.5523	77.0097	65.4569
miR156 2H:547101851-547101982	Cluster_1557	-	miR156	nCts	81.6123	72.5481	15.1496	74.8986	79.5912	33.0521	143.065	207.991	177.393	153.489	104.3	170.849	142.962	114.474	109.095
2H:557132909-557133014	Cluster_1580	-	unknown	nCts	1.53985	2.591	11.9033	5.67414	5.72224	3.14782	7.8124	10.8706	1.81013	3.06978	5.48948	11.583	1.97644	0	3.58222
miR171 2H:610738330-610738453	Cluster_1682	+	miR171	nCts	4.61956	12.955	0	0	0	4.72173	2.44138	6.52236	6.33546	3.06978	0.998088	0	0.658813	4.16269	1.95394
2H:640670230-640670380	Cluster_1777	+	unknown	nCts	6.15942	1.2955	2.16423	6.80896	9.88387	0	11.2303	10.8706	1.81013	1.53489	3.99235	0	1.97644	2.08134	2.2796
miR396 2H:648439735-648439874	Cluster_1803	+	miR396	nCts	1051.72	446.948	512.923	905.592	1536.16	522.538	1707.5	787.031	1498.79	1188.01	671.214	822.392	1913.19	751.365	611.257
miR393 2H:655580443-655580564	Cluster_1822	+	miR393	nCts	20.0181	20.728	10.8212	19.2921	17.1667	11.0174	5.8593	13.0447	15.3861	10.7442	12.9751	2.89575	5.27051	6.24403	6.18747
miR159 3H:11949359-11949572	Cluster_1875	-	miR159	nCts	130.888	106.231	165.564	710.402	663.26	535.129	639.152	671.803	778.356	776.656	374.782	431.466	438.77	626.484	353.663
miR156 3H:49404011-49404141	Cluster_1973	-	miR156	nCts	36.9565	44.047	120.115	7.94379	41.6163	42.4956	49.8041	44.9318	42.5381	82.8842	28.9446	11.583	70.493	85.3351	40.7071
miR319 3H:121156063-121156278	Cluster_2046	+	miR319	nCts	1339.67	843.371	946.851	2663.44	1845.16	1366.15	2488.74	2476.32	2901.64	1660.75	1408.3	1363.9	1338.71	1423.64	919.979
3H:567840082-567840213	Cluster_2558	+	unknown	nCts	23.0978	7.77301	1.08212	7.94379	11.4445	34.626	13.1834	20.2918	11.7658	7.67446	4.99044	8.68724	9.8822	27.0575	13.0263
miR5051 4H:558076938-558077060	Cluster_3388	+	miR5051	nCts	13.8587	2.591	20.5602	9.07862	11.9647	4.72173	27.3434	23.9153	26.2469	29.163	18.4646	20.2702	16.4703	14.5694	9.76969
miR167 4H:559503416-559503565	Cluster_3392	+	miR167	nCts	281.793	37.5695	2.16423	131.64	81.1518	59.8086	126.952	17.393	64.2596	382.188	36.4302	234.556	247.714	174.833	32.24
miR166 4H:561565175-561565321	Cluster_3396	+	miR166	nCts	9.23913	9.06851	6.49269	7.94379	5.72224	4.72173	238.767	26.0894	2.7152	1.53489	0.499044	5.79149	0	882.49	703.418
miR171 4H:584947356-584947473	Cluster_3461	-	miR171	nCts	0	2.591	0	6.80896	12.4849	1.57391	18.5545	5.79765	24.4368	33.7676	14.9713	0	22.3996	33.3015	7.4901
miR167 5H:42174025-42174141	Cluster_3623	-	miR167	nCts	132.428	141.21	208.848	274.628	208.602	221.921	201.169	362.353	212.69	0	176.662	55.0192	79.7164	176.914	186.275
miR167 5H:42176655-42176771	Cluster_3624	-	miR167	nCts	29.2572	7.77301	1.08212	3.40448	0.520204	3.14782	5.8593	4.34824	7.24052	6.13957	2.49522	17.3745	8.56457	6.24403	8.79272
5H:86631138-86631245	Cluster_3664	+	unknown	nCts	24.6377	16.8415	10.8212	9.07862	18.7273	50.3651	22.9489	22.4659	11.7658	1.53489	6.48757	5.79149	15.8115	27.0575	7.4901
miR166 5H:457063999-457064137	Cluster_4051	+	miR166	nCts	161.685	120.482	133.1	282.572	162.304	92.8607	180.662	263.068	296.861	554.096	263.994	257.722	480.275	393.374	297.976
miR167 5H:525224887-525225018	Cluster_4244	-	miR167	nCts	0	0	1.08212	0	0.520204	0	24.902	13.7694	16.2912	4.60468	6.98662	0	7.90576	4.16269	0
5H:538351996-538352085	Cluster_4290	+	unknown	nCts	6.15942	54.411	93.0619	21.5617	16.1263	62.9564	8.30068	39.8589	43.4431	7.67446	28.9446	8.68724	10.541	12.4881	10.0954
miR168 6H:34273952-34274061	Cluster_4564	+	miR168	nCts	307.971	262.987	190.452	385.841	382.35	204.608	726.065	824.716	1009.15	457.398	551.943	457.528	460.51	553.637	463.735
miR9662 6H:102023630-102023747	Cluster_4660	-	miR9662	nCts	435.779	291.488	428.518	452.796	318.885	302.191	492.67	602.956	416.33	471.212	445.147	437.258	403.852	449.57	375.808
miR167 6H:138383247-138383393	Cluster_4715	-	miR167	nCts	511.232	299.261	416.614	719.481	406.799	426.53	405.757	457.29	419.95	299.304	181.652	246.139	266.161	199.809	169.341
miR156 6H:355385244-355385372	Cluster_4963	+	miR156	nCts	58.5145	89.3896	64.9269	118.022	89.475	9.44346	46.8744	21.7412	22.6266	16.8838	21.9579	20.2702	64.5637	12.4881	58.2925
miR9660 6H:539320108-539320222	Cluster_5234	+	miR9660	nCts	9.23913	5.182	5.41058	9.07862	4.68183	15.7391	7.32413	9.42118	5.43039	30.6978	4.4914	5.79149	21.7408	8.32537	3.25656
miR6201 6H:557666865-557666994	Cluster_5317	+	miR6201	nCts	7.69927	0	4.32846	3.40448	2.60102	1.57391	5.8593	5.07294	11.7658	7.67446	16.9675	5.79149	2.63525	8.32537	14.0032
miR396 7H:50567509-50567636	Cluster_5480	+	miR396	nCts	47.7355	16.8415	48.6952	153.202	103	44.0695	65.4289	102.184	63.3546	194.931	92.3231	110.038	194.35	129.043	113.654
miR160 7H:592808125-592808250	Cluster_6224	+	miR160	nCts	3.07971	2.591	1.08212	2.26965	5.72224	3.14782	3.41793	6.52236	1.81013	1.53489	16.4685	0	5.92932	6.24403	2.93091

## Sheet: Table S3
Query	type	clusterName	seq	MIR_family	degradome	SiteID	transcriptID	TStart	TStop	TSlice	MFEperfect	MFEsite	MFEratio	AllenScore	Paired	Unpaired	Structure	Sequence	DegradomeCategory	DegradomePval
miR156-3p.Cluster_1973	miR156-3p	Cluster_1973	GCUCACUGCUCUAUCUGUCAGC	miR156	Day3	HORVU.MOREX.r3.5HG0440170.1:1769	HORVU.MOREX.r3.5HG0440170.1	1753	1780	1769	-43.5	-29.8	0.685057	13	1-7,1780-1774;8-12,1771-1767;13-16,1763-1760;17-22,1758-1753	x-x,1773-1772[BULt];x-x,1766-1764[BULt];x-x,1759-1759[BULt]	((((((.((((...(((((..(((((((&)))))))--)))))---))))-))))))	GCUGACAAGAUGCAGGAGUAGAGUGAGC&GCUCACU--GCUCU---AUCU-GUCAGC	1	0.0460957
miR156-5p.Cluster_1557.Cluster_1973.Cluster_4963	miR156-5p	Cluster_1557.Cluster_1973.Cluster_4963	UGACAGAAGAGAGUGAGCAC	miR156	Dry	HORVU.MOREX.r3.2HG0180110.1:3788	HORVU.MOREX.r3.2HG0180110.1	3778	3797	3788	-37.2	-26.5	0.712366	4.5	1-17,3797-3781	18-20,3780-3778[UP3]	...(((((((((((((((((&)))))))))))))))))...	GCACUCAUUCUUUUCUGUCA&UGACAGAAGAGAGUGAGCAC	0	0.0125013
miR156-5p.Cluster_1557.Cluster_1973.Cluster_4963	miR156-5p	Cluster_1557.Cluster_1973.Cluster_4963	UGACAGAAGAGAGUGAGCAC	miR156	Dry	HORVU.MOREX.r3.3HG0310780.1:1282	HORVU.MOREX.r3.3HG0310780.1	1272	1291	1282	-37.2	-34.6	0.930108	1	1-13,1291-1279;15-20,1277-1272	14-14,1278-1278[SIL]	((((((.(((((((((((((&))))))))))))).))))))	GUGCUCUCUCUCUUCUGUCA&UGACAGAAGAGAGUGAGCAC	0	0.00101949
miR156-5p.Cluster_1557.Cluster_1973.Cluster_4963	miR156-5p	Cluster_1557.Cluster_1973.Cluster_4963	UGACAGAAGAGAGUGAGCAC	miR156	Dry	HORVU.MOREX.r3.5HG0466060.1:680	HORVU.MOREX.r3.5HG0466060.1	670	690	680	-37.2	-28.3	0.760753	7	1-7,690-684;9-18,681-672	8-8,683-682[AILt];19-20,671-670[UP3]	..((((((((((..(((((((&)))))))-.))))))))))..	GAGCUCACUCUUGGUCUGUCA&UGACAGA-AGAGAGUGAGCAC	0	0.00474873
miR156-5p.Cluster_1557.Cluster_1973.Cluster_4963	miR156-5p	Cluster_1557.Cluster_1973.Cluster_4963	UGACAGAAGAGAGUGAGCAC	miR156	Dry	HORVU.MOREX.r3.5HG0490900.1:861	HORVU.MOREX.r3.5HG0490900.1	851	870	861	-37.2	-34.6	0.930108	1	1-13,870-858;15-20,856-851	14-14,857-857[SIL]	((((((.(((((((((((((&))))))))))))).))))))	GUGCUCUCUCUCUUCUGUCA&UGACAGAAGAGAGUGAGCAC	1	0.00101776
miR156-5p.Cluster_1557.Cluster_1973.Cluster_4963	miR156-5p	Cluster_1557.Cluster_1973.Cluster_4963	UGACAGAAGAGAGUGAGCAC	miR156	Dry	HORVU.MOREX.r3.5HG0494180.1:522	HORVU.MOREX.r3.5HG0494180.1	512	531	522	-37.2	-34.4	0.924731	1	1-13,531-519;15-20,517-512	14-14,518-518[SIL]	((((((.(((((((((((((&))))))))))))).))))))	GUGCUCUCUCUCUUCUGUCA&UGACAGAAGAGAGUGAGCAC	0	0.00237719
miR156-5p.Cluster_1557.Cluster_1973.Cluster_4963	miR156-5p	Cluster_1557.Cluster_1973.Cluster_4963	UGACAGAAGAGAGUGAGCAC	miR156	Dry	HORVU.MOREX.r3.7HG0679980.1:974	HORVU.MOREX.r3.7HG0679980.1	964	983	974	-37.2	-34.6	0.930108	1	1-13,983-971;15-20,969-964	14-14,970-970[SIL]	((((((.(((((((((((((&))))))))))))).))))))	GUGCUCUCUCUCUUCUGUCA&UGACAGAAGAGAGUGAGCAC	0	0.000679775
miR156-5p.Cluster_1557.Cluster_1973.Cluster_4963	miR156-5p	Cluster_1557.Cluster_1973.Cluster_4963	UGACAGAAGAGAGUGAGCAC	miR156	Day0	HORVU.MOREX.r3.3HG0310780.1:1282	HORVU.MOREX.r3.3HG0310780.1	1272	1291	1282	-37.2	-34.6	0.930108	1	1-13,1291-1279;15-20,1277-1272	14-14,1278-1278[SIL]	((((((.(((((((((((((&))))))))))))).))))))	GUGCUCUCUCUCUUCUGUCA&UGACAGAAGAGAGUGAGCAC	0	0.00163601
miR156-5p.Cluster_1557.Cluster_1973.Cluster_4963	miR156-5p	Cluster_1557.Cluster_1973.Cluster_4963	UGACAGAAGAGAGUGAGCAC	miR156	Day0	HORVU.MOREX.r3.4HG0408490.1:1232	HORVU.MOREX.r3.4HG0408490.1	1222	1240	1232	-37.2	-24.4	0.655914	6	2-3,1239-1238;5-18,1237-1224	1-1,1240-1240[UP5];4-4,x-x[BULq];19-20,1223-1222[UP3]	..((((((((((((((-((.&.)).))))))))))))))..	GGGCUCACUUUCUUCU-UCG&UGACAGAAGAGAGUGAGCAC	1	0.0300167
miR156-5p.Cluster_1557.Cluster_1973.Cluster_4963	miR156-5p	Cluster_1557.Cluster_1973.Cluster_4963	UGACAGAAGAGAGUGAGCAC	miR156	Day0	HORVU.MOREX.r3.4HG0410750.1:1333	HORVU.MOREX.r3.4HG0410750.1	1322	1342	1333	-37.2	-30.9	0.830645	4.5	1-1,1342-1342;3-12,1340-1331;13-20,1329-1322	2-2,1341-1341[SIL];x-x,1330-1330[BULt]	((((((((.((((((((((.(&).))))))))))-))))))))	GUGCUCGCGUCUCUUCUGUGA&UGACAGAAGAGA-GUGAGCAC	1	0.00238746
miR156-5p.Cluster_1557.Cluster_1973.Cluster_4963	miR156-5p	Cluster_1557.Cluster_1973.Cluster_4963	UGACAGAAGAGAGUGAGCAC	miR156	Day0	HORVU.MOREX.r3.5HG0490900.1:861	HORVU.MOREX.r3.5HG0490900.1	851	870	861	-37.2	-34.6	0.930108	1	1-13,870-858;15-20,856-851	14-14,857-857[SIL]	((((((.(((((((((((((&))))))))))))).))))))	GUGCUCUCUCUCUUCUGUCA&UGACAGAAGAGAGUGAGCAC	0	0.000818341
miR156-5p.Cluster_1557.Cluster_1973.Cluster_4963	miR156-5p	Cluster_1557.Cluster_1973.Cluster_4963	UGACAGAAGAGAGUGAGCAC	miR156	Day0	HORVU.MOREX.r3.5HG0494180.1:522	HORVU.MOREX.r3.5HG0494180.1	512	531	522	-37.2	-34.4	0.924731	1	1-13,531-519;15-20,517-512	14-14,518-518[SIL]	((((((.(((((((((((((&))))))))))))).))))))	GUGCUCUCUCUCUUCUGUCA&UGACAGAAGAGAGUGAGCAC	0	0.00286126
miR156-5p.Cluster_1557.Cluster_1973.Cluster_4963	miR156-5p	Cluster_1557.Cluster_1973.Cluster_4963	UGACAGAAGAGAGUGAGCAC	miR156	Day0	HORVU.MOREX.r3.7HG0684000.1:870	HORVU.MOREX.r3.7HG0684000.1	860	879	870	-37.2	-34.6	0.930108	1	1-13,879-867;15-20,865-860	14-14,866-866[SIL]	((((((.(((((((((((((&))))))))))))).))))))	GUGCUCUCUCUCUUCUGUCA&UGACAGAAGAGAGUGAGCAC	0	0.0020446
miR156-5p.Cluster_1557.Cluster_1973.Cluster_4963	miR156-5p	Cluster_1557.Cluster_1973.Cluster_4963	UGACAGAAGAGAGUGAGCAC	miR156	Day1	HORVU.MOREX.r3.2HG0189580.1:648	HORVU.MOREX.r3.2HG0189580.1	638	657	648	-37.2	-34.6	0.930108	1	1-13,657-645;15-20,643-638	14-14,644-644[SIL]	((((((.(((((((((((((&))))))))))))).))))))	GUGCUCUCUCUCUUCUGUCA&UGACAGAAGAGAGUGAGCAC	0	0.00162733
miR156-5p.Cluster_1557.Cluster_1973.Cluster_4963	miR156-5p	Cluster_1557.Cluster_1973.Cluster_4963	UGACAGAAGAGAGUGAGCAC	miR156	Day1	HORVU.MOREX.r3.3HG0310780.1:1282	HORVU.MOREX.r3.3HG0310780.1	1272	1291	1282	-37.2	-34.6	0.930108	1	1-13,1291-1279;15-20,1277-1272	14-14,1278-1278[SIL]	((((((.(((((((((((((&))))))))))))).))))))	GUGCUCUCUCUCUUCUGUCA&UGACAGAAGAGAGUGAGCAC	0	0.00203374
miR156-5p.Cluster_1557.Cluster_1973.Cluster_4963	miR156-5p	Cluster_1557.Cluster_1973.Cluster_4963	UGACAGAAGAGAGUGAGCAC	miR156	Day1	HORVU.MOREX.r3.5HG0490900.1:861	HORVU.MOREX.r3.5HG0490900.1	851	870	861	-37.2	-34.6	0.930108	1	1-13,870-858;15-20,856-851	14-14,857-857[SIL]	((((((.(((((((((((((&))))))))))))).))))))	GUGCUCUCUCUCUUCUGUCA&UGACAGAAGAGAGUGAGCAC	0	0.00122074
miR156-5p.Cluster_1557.Cluster_1973.Cluster_4963	miR156-5p	Cluster_1557.Cluster_1973.Cluster_4963	UGACAGAAGAGAGUGAGCAC	miR156	Day1	HORVU.MOREX.r3.5HG0494180.1:522	HORVU.MOREX.r3.5HG0494180.1	512	531	522	-37.2	-34.4	0.924731	1	1-13,531-519;15-20,517-512	14-14,518-518[SIL]	((((((.(((((((((((((&))))))))))))).))))))	GUGCUCUCUCUCUUCUGUCA&UGACAGAAGAGAGUGAGCAC	0	0.00284608
miR156-5p.Cluster_1557.Cluster_1973.Cluster_4963	miR156-5p	Cluster_1557.Cluster_1973.Cluster_4963	UGACAGAAGAGAGUGAGCAC	miR156	Day1	HORVU.MOREX.r3.7HG0679980.1:974	HORVU.MOREX.r3.7HG0679980.1	964	983	974	-37.2	-34.6	0.930108	1	1-13,983-971;15-20,969-964	14-14,970-970[SIL]	((((((.(((((((((((((&))))))))))))).))))))	GUGCUCUCUCUCUUCUGUCA&UGACAGAAGAGAGUGAGCAC	0	0.00244
miR156-5p.Cluster_1557.Cluster_1973.Cluster_4963	miR156-5p	Cluster_1557.Cluster_1973.Cluster_4963	UGACAGAAGAGAGUGAGCAC	miR156	Day1	HORVU.MOREX.r3.7HG0684000.1:870	HORVU.MOREX.r3.7HG0684000.1	860	879	870	-37.2	-34.6	0.930108	1	1-13,879-867;15-20,865-860	14-14,866-866[SIL]	((((((.(((((((((((((&))))))))))))).))))))	GUGCUCUCUCUCUUCUGUCA&UGACAGAAGAGAGUGAGCAC	0	0.000813994
miR156-5p.Cluster_1557.Cluster_1973.Cluster_4963	miR156-5p	Cluster_1557.Cluster_1973.Cluster_4963	UGACAGAAGAGAGUGAGCAC	miR156	Day3	HORVU.MOREX.r3.2HG0189580.1:648	HORVU.MOREX.r3.2HG0189580.1	638	657	648	-37.2	-34.6	0.930108	1	1-13,657-645;15-20,643-638	14-14,644-644[SIL]	((((((.(((((((((((((&))))))))))))).))))))	GUGCUCUCUCUCUUCUGUCA&UGACAGAAGAGAGUGAGCAC	0	0.00160391
miR156-5p.Cluster_1557.Cluster_1973.Cluster_4963	miR156-5p	Cluster_1557.Cluster_1973.Cluster_4963	UGACAGAAGAGAGUGAGCAC	miR156	Day3	HORVU.MOREX.r3.3HG0310780.1:1282	HORVU.MOREX.r3.3HG0310780.1	1272	1291	1282	-37.2	-34.6	0.930108	1	1-13,1291-1279;15-20,1277-1272	14-14,1278-1278[SIL]	((((((.(((((((((((((&))))))))))))).))))))	GUGCUCUCUCUCUUCUGUCA&UGACAGAAGAGAGUGAGCAC	0	0.0024049
miR156-5p.Cluster_1557.Cluster_1973.Cluster_4963	miR156-5p	Cluster_1557.Cluster_1973.Cluster_4963	UGACAGAAGAGAGUGAGCAC	miR156	Day3	HORVU.MOREX.r3.5HG0490900.1:861	HORVU.MOREX.r3.5HG0490900.1	851	870	861	-37.2	-34.6	0.930108	1	1-13,870-858;15-20,856-851	14-14,857-857[SIL]	((((((.(((((((((((((&))))))))))))).))))))	GUGCUCUCUCUCUUCUGUCA&UGACAGAAGAGAGUGAGCAC	0	0.00200449
miR156-5p.Cluster_1557.Cluster_1973.Cluster_4963	miR156-5p	Cluster_1557.Cluster_1973.Cluster_4963	UGACAGAAGAGAGUGAGCAC	miR156	Day3	HORVU.MOREX.r3.5HG0494180.1:522	HORVU.MOREX.r3.5HG0494180.1	512	531	522	-37.2	-34.4	0.924731	1	1-13,531-519;15-20,517-512	14-14,518-518[SIL]	((((((.(((((((((((((&))))))))))))).))))))	GUGCUCUCUCUCUUCUGUCA&UGACAGAAGAGAGUGAGCAC	0	0.00280516
miR156-5p.Cluster_1557.Cluster_1973.Cluster_4963	miR156-5p	Cluster_1557.Cluster_1973.Cluster_4963	UGACAGAAGAGAGUGAGCAC	miR156	Day3	HORVU.MOREX.r3.7HG0679980.1:974	HORVU.MOREX.r3.7HG0679980.1	964	983	974	-37.2	-34.6	0.930108	1	1-13,983-971;15-20,969-964	14-14,970-970[SIL]	((((((.(((((((((((((&))))))))))))).))))))	GUGCUCUCUCUCUUCUGUCA&UGACAGAAGAGAGUGAGCAC	0	0.00120317
miR156-5p.Cluster_1557.Cluster_1973.Cluster_4963	miR156-5p	Cluster_1557.Cluster_1973.Cluster_4963	UGACAGAAGAGAGUGAGCAC	miR156	Day3	HORVU.MOREX.r3.7HG0684000.1:870	HORVU.MOREX.r3.7HG0684000.1	860	879	870	-37.2	-34.6	0.930108	1	1-13,879-867;15-20,865-860	14-14,866-866[SIL]	((((((.(((((((((((((&))))))))))))).))))))	GUGCUCUCUCUCUUCUGUCA&UGACAGAAGAGAGUGAGCAC	0	0.000802277
miR156-5p.Cluster_1557.Cluster_1973.Cluster_4963	miR156-5p	Cluster_1557.Cluster_1973.Cluster_4963	UGACAGAAGAGAGUGAGCAC	miR156	Day5	HORVU.MOREX.r3.3HG0310780.1:1282	HORVU.MOREX.r3.3HG0310780.1	1272	1291	1282	-37.2	-34.6	0.930108	1	1-13,1291-1279;15-20,1277-1272	14-14,1278-1278[SIL]	((((((.(((((((((((((&))))))))))))).))))))	GUGCUCUCUCUCUUCUGUCA&UGACAGAAGAGAGUGAGCAC	0	0.00162536
miR156-5p.Cluster_1557.Cluster_1973.Cluster_4963	miR156-5p	Cluster_1557.Cluster_1973.Cluster_4963	UGACAGAAGAGAGUGAGCAC	miR156	Day5	HORVU.MOREX.r3.5HG0490900.1:861	HORVU.MOREX.r3.5HG0490900.1	851	870	861	-37.2	-34.6	0.930108	1	1-13,870-858;15-20,856-851	14-14,857-857[SIL]	((((((.(((((((((((((&))))))))))))).))))))	GUGCUCUCUCUCUUCUGUCA&UGACAGAAGAGAGUGAGCAC	0	0.00121927
miR156-5p.Cluster_1557.Cluster_1973.Cluster_4963	miR156-5p	Cluster_1557.Cluster_1973.Cluster_4963	UGACAGAAGAGAGUGAGCAC	miR156	Day5	HORVU.MOREX.r3.5HG0494180.1:522	HORVU.MOREX.r3.5HG0494180.1	512	531	522	-37.2	-34.4	0.924731	1	1-13,531-519;15-20,517-512	14-14,518-518[SIL]	((((((.(((((((((((((&))))))))))))).))))))	GUGCUCUCUCUCUUCUGUCA&UGACAGAAGAGAGUGAGCAC	0	0.00284265
miR156-5p.Cluster_1557.Cluster_1973.Cluster_4963	miR156-5p	Cluster_1557.Cluster_1973.Cluster_4963	UGACAGAAGAGAGUGAGCAC	miR156	Day5	HORVU.MOREX.r3.7HG0679980.1:974	HORVU.MOREX.r3.7HG0679980.1	964	983	974	-37.2	-34.6	0.930108	1	1-13,983-971;15-20,969-964	14-14,970-970[SIL]	((((((.(((((((((((((&))))))))))))).))))))	GUGCUCUCUCUCUUCUGUCA&UGACAGAAGAGAGUGAGCAC	0	0.00243705
miR156-5p.Cluster_1557.Cluster_1973.Cluster_4963	miR156-5p	Cluster_1557.Cluster_1973.Cluster_4963	UGACAGAAGAGAGUGAGCAC	miR156	Day5	HORVU.MOREX.r3.7HG0684000.1:870	HORVU.MOREX.r3.7HG0684000.1	860	879	870	-37.2	-34.6	0.930108	1	1-13,879-867;15-20,865-860	14-14,866-866[SIL]	((((((.(((((((((((((&))))))))))))).))))))	GUGCUCUCUCUCUUCUGUCA&UGACAGAAGAGAGUGAGCAC	0	0.00203129
miR159-3p.Cluster_1875	miR159-3p	Cluster_1875	UUUGGAUUGAAGGGAGCUCUG	miR159	Dry	HORVU.MOREX.r3.2HG0195210.1:81	HORVU.MOREX.r3.2HG0195210.1	70	90	81	-37.8	-27	0.714286	6	2-10,89-81;12-18,79-73	1-1,90-90[UP5];11-11,80-80[SIL];19-21,72-70[UP3]	...(((((((.(((((((((.&.))))))))).)))))))...	UCAAGCUCCCCUCAAUCCAAU&UUUGGAUUGAAGGGAGCUCUG	0	0.0248464
miR159-3p.Cluster_1875	miR159-3p	Cluster_1875	UUUGGAUUGAAGGGAGCUCUG	miR159	Dry	HORVU.MOREX.r3.3HG0296070.1:1255	HORVU.MOREX.r3.3HG0296070.1	1244	1264	1255	-37.8	-32.1	0.849206	4.5	2-6,1263-1259;8-20,1257-1245	1-1,1264-1264[UP5];7-7,1258-1258[SIL];21-21,1244-1244[UP3]	.(((((((((((((.(((((.&.))))).))))))))))))).	UGGAGCUCCCUUCACUCCAAG&UUUGGAUUGAAGGGAGCUCUG	0	0.00101949
miR159-3p.Cluster_1875	miR159-3p	Cluster_1875	UUUGGAUUGAAGGGAGCUCUG	miR159	Day0	HORVU.MOREX.r3.3HG0296070.1:1255	HORVU.MOREX.r3.3HG0296070.1	1244	1264	1255	-37.8	-32.1	0.849206	4.5	2-6,1263-1259;8-20,1257-1245	1-1,1264-1264[UP5];7-7,1258-1258[SIL];21-21,1244-1244[UP3]	.(((((((((((((.(((((.&.))))).))))))))))))).	UGGAGCUCCCUUCACUCCAAG&UUUGGAUUGAAGGGAGCUCUG	0	0.00122726
miR159-3p.Cluster_1875	miR159-3p	Cluster_1875	UUUGGAUUGAAGGGAGCUCUG	miR159	Day0	HORVU.MOREX.r3.7HG0719850.1:934	HORVU.MOREX.r3.7HG0719850.1	923	943	934	-37.8	-32.4	0.857143	4	2-6,942-938;8-21,936-923	1-1,943-943[UP5];7-7,937-937[SIL]	((((((((((((((.(((((.&.))))).))))))))))))))	CGGAGUUCCCUUCAUUCCAAU&UUUGGAUUGAAGGGAGCUCUG	0	0.000818341
miR159-3p.Cluster_1875	miR159-3p	Cluster_1875	UUUGGAUUGAAGGGAGCUCUG	miR159	Day1	HORVU.MOREX.r3.3HG0296070.1:1255	HORVU.MOREX.r3.3HG0296070.1	1244	1264	1255	-37.8	-32.1	0.849206	4.5	2-6,1263-1259;8-20,1257-1245	1-1,1264-1264[UP5];7-7,1258-1258[SIL];21-21,1244-1244[UP3]	.(((((((((((((.(((((.&.))))).))))))))))))).	UGGAGCUCCCUUCACUCCAAG&UUUGGAUUGAAGGGAGCUCUG	0	0.00122074
miR159-3p.Cluster_1875	miR159-3p	Cluster_1875	UUUGGAUUGAAGGGAGCUCUG	miR159	Day1	HORVU.MOREX.r3.7HG0719850.1:934	HORVU.MOREX.r3.7HG0719850.1	923	943	934	-37.8	-32.4	0.857143	4	2-6,942-938;8-21,936-923	1-1,943-943[UP5];7-7,937-937[SIL]	((((((((((((((.(((((.&.))))).))))))))))))))	CGGAGUUCCCUUCAUUCCAAU&UUUGGAUUGAAGGGAGCUCUG	0	0.000813994
miR159-3p.Cluster_1875	miR159-3p	Cluster_1875	UUUGGAUUGAAGGGAGCUCUG	miR159	Day3	HORVU.MOREX.r3.3HG0296070.1:1255	HORVU.MOREX.r3.3HG0296070.1	1244	1264	1255	-37.8	-32.1	0.849206	4.5	2-6,1263-1259;8-20,1257-1245	1-1,1264-1264[UP5];7-7,1258-1258[SIL];21-21,1244-1244[UP3]	.(((((((((((((.(((((.&.))))).))))))))))))).	UGGAGCUCCCUUCACUCCAAG&UUUGGAUUGAAGGGAGCUCUG	0	0.00120317
miR159-3p.Cluster_1875	miR159-3p	Cluster_1875	UUUGGAUUGAAGGGAGCUCUG	miR159	Day5	HORVU.MOREX.r3.3HG0296070.1:1255	HORVU.MOREX.r3.3HG0296070.1	1244	1264	1255	-37.8	-32.1	0.849206	4.5	2-6,1263-1259;8-20,1257-1245	1-1,1264-1264[UP5];7-7,1258-1258[SIL];21-21,1244-1244[UP3]	.(((((((((((((.(((((.&.))))).))))))))))))).	UGGAGCUCCCUUCACUCCAAG&UUUGGAUUGAAGGGAGCUCUG	0	0.00121927
miR160-5p.Cluster_6224	miR160-5p	Cluster_6224	UGCCUGGCUCCCUGUAUGCCA	miR160	Dry	HORVU.MOREX.r3.2HG0182280.1:1474	HORVU.MOREX.r3.2HG0182280.1	1463	1483	1474	-45.4	-41.8	0.920705	2	1-17,1483-1467;19-20,1465-1464	18-18,1466-1466[SIL];21-21,1463-1463[UP3]	.((.(((((((((((((((((&))))))))))))))))).)).	AGGGAUACAGGGAGCCAGGCA&UGCCUGGCUCCCUGUAUGCCA	0	0.00203794
miR160-5p.Cluster_6224	miR160-5p	Cluster_6224	UGCCUGGCUCCCUGUAUGCCA	miR160	Day0	HORVU.MOREX.r3.2HG0182280.1:1474	HORVU.MOREX.r3.2HG0182280.1	1463	1483	1474	-45.4	-41.8	0.920705	2	1-17,1483-1467;19-20,1465-1464	18-18,1466-1466[SIL];21-21,1463-1463[UP3]	.((.(((((((((((((((((&))))))))))))))))).)).	AGGGAUACAGGGAGCCAGGCA&UGCCUGGCUCCCUGUAUGCCA	0	0.00245301
miR160-5p.Cluster_6224	miR160-5p	Cluster_6224	UGCCUGGCUCCCUGUAUGCCA	miR160	Day0	HORVU.MOREX.r3.6HG0596670.1:1568	HORVU.MOREX.r3.6HG0596670.1	1557	1577	1568	-45.4	-45.9	1	1	1-20,1577-1558	21-21,1557-1557[UP3]	.((((((((((((((((((((&)))))))))))))))))))).	AGGCAUACAGGGAGCCAGGCA&UGCCUGGCUCCCUGUAUGCCA	0	0.000409254
miR160-5p.Cluster_6224	miR160-5p	Cluster_6224	UGCCUGGCUCCCUGUAUGCCA	miR160	Day1	HORVU.MOREX.r3.2HG0182280.1:1474	HORVU.MOREX.r3.2HG0182280.1	1463	1483	1474	-45.4	-41.8	0.920705	2	1-17,1483-1467;19-20,1465-1464	18-18,1466-1466[SIL];21-21,1463-1463[UP3]	.((.(((((((((((((((((&))))))))))))))))).)).	AGGGAUACAGGGAGCCAGGCA&UGCCUGGCUCCCUGUAUGCCA	0	0.00244
miR160-5p.Cluster_6224	miR160-5p	Cluster_6224	UGCCUGGCUCCCUGUAUGCCA	miR160	Day1	HORVU.MOREX.r3.6HG0596670.1:1568	HORVU.MOREX.r3.6HG0596670.1	1557	1577	1568	-45.4	-45.9	1	1	1-20,1577-1558	21-21,1557-1557[UP3]	.((((((((((((((((((((&)))))))))))))))))))).	AGGCAUACAGGGAGCCAGGCA&UGCCUGGCUCCCUGUAUGCCA	0	0.00040708
miR160-5p.Cluster_6224	miR160-5p	Cluster_6224	UGCCUGGCUCCCUGUAUGCCA	miR160	Day3	HORVU.MOREX.r3.1HG0043670.1:1595	HORVU.MOREX.r3.1HG0043670.1	1584	1604	1595	-45.4	-45.9	1	1	1-20,1604-1585	21-21,1584-1584[UP3]	.((((((((((((((((((((&)))))))))))))))))))).	AGGCAUACAGGGAGCCAGGCA&UGCCUGGCUCCCUGUAUGCCA	0	0.00160391
miR160-5p.Cluster_6224	miR160-5p	Cluster_6224	UGCCUGGCUCCCUGUAUGCCA	miR160	Day3	HORVU.MOREX.r3.1HG0043670.2:1512	HORVU.MOREX.r3.1HG0043670.2	1501	1521	1512	-45.4	-45.9	1	1	1-20,1521-1502	21-21,1501-1501[UP3]	.((((((((((((((((((((&)))))))))))))))))))).	AGGCAUACAGGGAGCCAGGCA&UGCCUGGCUCCCUGUAUGCCA	0	0.00200449
miR160-5p.Cluster_6224	miR160-5p	Cluster_6224	UGCCUGGCUCCCUGUAUGCCA	miR160	Day3	HORVU.MOREX.r3.2HG0182280.1:1474	HORVU.MOREX.r3.2HG0182280.1	1463	1483	1474	-45.4	-41.8	0.920705	2	1-17,1483-1467;19-20,1465-1464	18-18,1466-1466[SIL];21-21,1463-1463[UP3]	.((.(((((((((((((((((&))))))))))))))))).)).	AGGGAUACAGGGAGCCAGGCA&UGCCUGGCUCCCUGUAUGCCA	0	0.0024049
miR160-5p.Cluster_6224	miR160-5p	Cluster_6224	UGCCUGGCUCCCUGUAUGCCA	miR160	Day3	HORVU.MOREX.r3.2HG0216230.1:1322	HORVU.MOREX.r3.2HG0216230.1	1311	1331	1322	-45.4	-46.7	1	0.5	1-21,1331-1311	NA	(((((((((((((((((((((&)))))))))))))))))))))	UGGCAUGCAGGGAGCCAGGCA&UGCCUGGCUCCCUGUAUGCCA	0	0.000802277
miR160-5p.Cluster_6224	miR160-5p	Cluster_6224	UGCCUGGCUCCCUGUAUGCCA	miR160	Day3	HORVU.MOREX.r3.6HG0596670.1:1568	HORVU.MOREX.r3.6HG0596670.1	1557	1577	1568	-45.4	-45.9	1	1	1-20,1577-1558	21-21,1557-1557[UP3]	.((((((((((((((((((((&)))))))))))))))))))).	AGGCAUACAGGGAGCCAGGCA&UGCCUGGCUCCCUGUAUGCCA	0	0.000401219
miR160-5p.Cluster_6224	miR160-5p	Cluster_6224	UGCCUGGCUCCCUGUAUGCCA	miR160	Day3	HORVU.MOREX.r3.7HG0731750.1:1364	HORVU.MOREX.r3.7HG0731750.1	1353	1373	1364	-45.4	-45.9	1	1	1-20,1373-1354	21-21,1353-1353[UP3]	.((((((((((((((((((((&)))))))))))))))))))).	AGGCAUACAGGGAGCCAGGCA&UGCCUGGCUCCCUGUAUGCCA	0	0.00120317
miR160-5p.Cluster_6224	miR160-5p	Cluster_6224	UGCCUGGCUCCCUGUAUGCCA	miR160	Day5	HORVU.MOREX.r3.1HG0043670.1:1595	HORVU.MOREX.r3.1HG0043670.1	1584	1604	1595	-45.4	-45.9	1	1	1-20,1604-1585	21-21,1584-1584[UP3]	.((((((((((((((((((((&)))))))))))))))))))).	AGGCAUACAGGGAGCCAGGCA&UGCCUGGCUCCCUGUAUGCCA	0	0.000813012
miR160-5p.Cluster_6224	miR160-5p	Cluster_6224	UGCCUGGCUCCCUGUAUGCCA	miR160	Day5	HORVU.MOREX.r3.1HG0043670.2:1512	HORVU.MOREX.r3.1HG0043670.2	1501	1521	1512	-45.4	-45.9	1	1	1-20,1521-1502	21-21,1501-1501[UP3]	.((((((((((((((((((((&)))))))))))))))))))).	AGGCAUACAGGGAGCCAGGCA&UGCCUGGCUCCCUGUAUGCCA	0	0.000406588
miR160-5p.Cluster_6224	miR160-5p	Cluster_6224	UGCCUGGCUCCCUGUAUGCCA	miR160	Day5	HORVU.MOREX.r3.2HG0182280.1:1474	HORVU.MOREX.r3.2HG0182280.1	1463	1483	1474	-45.4	-41.8	0.920705	2	1-17,1483-1467;19-20,1465-1464	18-18,1466-1466[SIL];21-21,1463-1463[UP3]	.((.(((((((((((((((((&))))))))))))))))).)).	AGGGAUACAGGGAGCCAGGCA&UGCCUGGCUCCCUGUAUGCCA	0	0.00243705
miR160-5p.Cluster_6224	miR160-5p	Cluster_6224	UGCCUGGCUCCCUGUAUGCCA	miR160	Day5	HORVU.MOREX.r3.6HG0596670.1:1568	HORVU.MOREX.r3.6HG0596670.1	1557	1577	1568	-45.4	-45.9	1	1	1-20,1577-1558	21-21,1557-1557[UP3]	.((((((((((((((((((((&)))))))))))))))))))).	AGGCAUACAGGGAGCCAGGCA&UGCCUGGCUCCCUGUAUGCCA	0	0.00203129
miR166-3p.Cluster_4051	miR166-3p	Cluster_4051	UCGGACCAGGCUUCAAUCCCU	miR166	Dry	HORVU.MOREX.r3.1HG0028230.1:559	HORVU.MOREX.r3.1HG0028230.1	547	568	559	-42.4	-33.7	0.794811	5.5	3-15,566-554;16-21,552-547	1-2,568-567[UP5];x-x,553-553[BULt]	((((((.(((((((((((((..&..)))))))))))))-))))))	GGGGAUGUGAAGUCUGGUCCAG&UCGGACCAGGCUUCA-AUCCCU	0	0.00203794
miR166-3p.Cluster_4051	miR166-3p	Cluster_4051	UCGGACCAGGCUUCAAUCCCU	miR166	Dry	HORVU.MOREX.r3.7HG0688280.1:1532	HORVU.MOREX.r3.7HG0688280.1	1521	1541	1532	-42.4	-27.8	0.65566	6.5	2-17,1540-1525	1-1,1541-1541[UP5];18-21,1524-1521[UP3]	....((((((((((((((((.&.))))))))))))))))....	AACUGUUGAAGCCUGGUUCGC&UCGGACCAGGCUUCAAUCCCU	1	0.0266235
miR166-3p.Cluster_4051	miR166-3p	Cluster_4051	UCGGACCAGGCUUCAAUCCCU	miR166	Day3	HORVU.MOREX.r3.1HG0028230.1:559	HORVU.MOREX.r3.1HG0028230.1	547	568	559	-42.4	-33.7	0.794811	5.5	3-15,566-554;16-21,552-547	1-2,568-567[UP5];x-x,553-553[BULt]	((((((.(((((((((((((..&..)))))))))))))-))))))	GGGGAUGUGAAGUCUGGUCCAG&UCGGACCAGGCUUCA-AUCCCU	0	0.0024049
miR166-3p.Cluster_4051	miR166-3p	Cluster_4051	UCGGACCAGGCUUCAAUCCCU	miR166	Day3	HORVU.MOREX.r3.4HG0417970.1:1029	HORVU.MOREX.r3.4HG0417970.1	1019	1038	1029	-42.4	-36.9	0.870283	3	2-15,1037-1024;17-20,1023-1020	1-1,1038-1038[UP5];16-16,x-x[BULq];21-21,1019-1019[UP3]	.((((-((((((((((((((.&.)))))))))))))).)))).	UGGGA-UGAAGCCUGGUCCGG&UCGGACCAGGCUUCAAUCCCU	0	0.000802277
miR166-3p.Cluster_4051	miR166-3p	Cluster_4051	UCGGACCAGGCUUCAAUCCCU	miR166	Day3	HORVU.MOREX.r3.5HG0429100.1:991	HORVU.MOREX.r3.5HG0429100.1	980	1000	991	-42.4	-37.7	0.889151	3	2-15,999-986;17-20,984-981	1-1,1000-1000[UP5];16-16,985-985[SIL];21-21,980-980[UP3]	.((((.((((((((((((((.&.)))))))))))))).)))).	UGGGAAUGAAGCCUGGUCCGG&UCGGACCAGGCUUCAAUCCCU	0	0.000401219
miR166-3p.Cluster_4051	miR166-3p	Cluster_4051	UCGGACCAGGCUUCAAUCCCU	miR166	Day3	HORVU.MOREX.r3.6HG0603530.1:176	HORVU.MOREX.r3.6HG0603530.1	164	185	176	-42.4	-32.1	0.757075	5	2-14,184-172;17-18,169-168;19-20,166-165	1-1,185-185[UP5];15-16,171-170[SIL];x-x,167-167[BULt];21-21,164-164[UP3]	.((.((..(((((((((((((.&.)))))))))))))..))-)).	CGGUGAAGGAAGCCUGGUCCGU&UCGGACCAGGCUUCAAUC-CCU	1	0.0028051
miR166-3p.Cluster_4051	miR166-3p	Cluster_4051	UCGGACCAGGCUUCAAUCCCU	miR166	Day5	HORVU.MOREX.r3.3HG0244080.1:574	HORVU.MOREX.r3.3HG0244080.1	564	583	574	-42.4	-36.9	0.870283	3	2-15,582-569;17-20,568-565	1-1,583-583[UP5];16-16,x-x[BULq];21-21,564-564[UP3]	.((((-((((((((((((((.&.)))))))))))))).)))).	UGGGA-UGAAGCCUGGUCCGG&UCGGACCAGGCUUCAAUCCCU	0	0.000813012
miR166-3p.Cluster_426.Cluster_3396	miR166-3p	Cluster_426.Cluster_3396	UCGGACCAGGCUUCAUUCCCC	miR166	Dry	HORVU.MOREX.r3.2HG0139920.1:200	HORVU.MOREX.r3.2HG0139920.1	189	209	200	-44.1	-36.4	0.825397	3.5	1-19,209-191	20-21,190-189[UP3]	..(((((((((((((((((((&)))))))))))))))))))..	GAGGAGUGAAGCUUGGUCCGA&UCGGACCAGGCUUCAUUCCCC	0	0.00203794
miR166-3p.Cluster_426.Cluster_3396	miR166-3p	Cluster_426.Cluster_3396	UCGGACCAGGCUUCAUUCCCC	miR166	Day0	HORVU.MOREX.r3.2HG0139920.1:200	HORVU.MOREX.r3.2HG0139920.1	189	209	200	-44.1	-36.4	0.825397	3.5	1-19,209-191	20-21,190-189[UP3]	..(((((((((((((((((((&)))))))))))))))))))..	GAGGAGUGAAGCUUGGUCCGA&UCGGACCAGGCUUCAUUCCCC	0	0.00245301
miR166-3p.Cluster_426.Cluster_3396	miR166-3p	Cluster_426.Cluster_3396	UCGGACCAGGCUUCAUUCCCC	miR166	Day0	HORVU.MOREX.r3.3HG0244080.1:574	HORVU.MOREX.r3.3HG0244080.1	563	583	574	-44.1	-37.4	0.848073	3.5	2-19,582-565	1-1,583-583[UP5];20-21,564-563[UP3]	..((((((((((((((((((.&.))))))))))))))))))..	CUGGGAUGAAGCCUGGUCCGG&UCGGACCAGGCUUCAUUCCCC	0	0.00122726
miR166-3p.Cluster_426.Cluster_3396	miR166-3p	Cluster_426.Cluster_3396	UCGGACCAGGCUUCAUUCCCC	miR166	Day1	HORVU.MOREX.r3.2HG0139920.1:200	HORVU.MOREX.r3.2HG0139920.1	189	209	200	-44.1	-36.4	0.825397	3.5	1-19,209-191	20-21,190-189[UP3]	..(((((((((((((((((((&)))))))))))))))))))..	GAGGAGUGAAGCUUGGUCCGA&UCGGACCAGGCUUCAUUCCCC	0	0.00244
miR166-3p.Cluster_426.Cluster_3396	miR166-3p	Cluster_426.Cluster_3396	UCGGACCAGGCUUCAUUCCCC	miR166	Day1	HORVU.MOREX.r3.3HG0244080.1:574	HORVU.MOREX.r3.3HG0244080.1	563	583	574	-44.1	-37.4	0.848073	3.5	2-19,582-565	1-1,583-583[UP5];20-21,564-563[UP3]	..((((((((((((((((((.&.))))))))))))))))))..	CUGGGAUGAAGCCUGGUCCGG&UCGGACCAGGCUUCAUUCCCC	0	0.00122074
miR166-3p.Cluster_426.Cluster_3396	miR166-3p	Cluster_426.Cluster_3396	UCGGACCAGGCUUCAUUCCCC	miR166	Day3	HORVU.MOREX.r3.2HG0139920.1:200	HORVU.MOREX.r3.2HG0139920.1	189	209	200	-44.1	-36.4	0.825397	3.5	1-19,209-191	20-21,190-189[UP3]	..(((((((((((((((((((&)))))))))))))))))))..	GAGGAGUGAAGCUUGGUCCGA&UCGGACCAGGCUUCAUUCCCC	0	0.0024049
miR166-3p.Cluster_426.Cluster_3396	miR166-3p	Cluster_426.Cluster_3396	UCGGACCAGGCUUCAUUCCCC	miR166	Day3	HORVU.MOREX.r3.3HG0244080.1:574	HORVU.MOREX.r3.3HG0244080.1	563	583	574	-44.1	-37.4	0.848073	3.5	2-19,582-565	1-1,583-583[UP5];20-21,564-563[UP3]	..((((((((((((((((((.&.))))))))))))))))))..	CUGGGAUGAAGCCUGGUCCGG&UCGGACCAGGCUUCAUUCCCC	0	0.00120317
miR166-3p.Cluster_426.Cluster_3396	miR166-3p	Cluster_426.Cluster_3396	UCGGACCAGGCUUCAUUCCCC	miR166	Day5	HORVU.MOREX.r3.2HG0139920.1:200	HORVU.MOREX.r3.2HG0139920.1	189	209	200	-44.1	-36.4	0.825397	3.5	1-19,209-191	20-21,190-189[UP3]	..(((((((((((((((((((&)))))))))))))))))))..	GAGGAGUGAAGCUUGGUCCGA&UCGGACCAGGCUUCAUUCCCC	0	0.00243705
miR166-5p.Cluster_3396	miR166-5p	Cluster_3396	GGAAUGUUGUCUGGUUGGAGA	miR166	Dry	HORVU.MOREX.r3.7HG0649490.1:258	HORVU.MOREX.r3.7HG0649490.1	245	267	258	-37.9	-28.1	0.741425	6.5	1-8,267-260;10-15,258-253;16-21,250-245	9-9,259-259[SIL];x-x,252-251[BULt]	((((((..((((((.((((((((&)))))))).))))))--))))))	UCUCCAUGGCCAGGAAGCAUUCC&GGAAUGUUGUCUGGU--UGGAGA	1	0.0119773
miR166-5p.Cluster_3396	miR166-5p	Cluster_3396	GGAAUGUUGUCUGGUUGGAGA	miR166	Day5	HORVU.MOREX.r3.7HG0649520.1:186	HORVU.MOREX.r3.7HG0649520.1	173	195	186	-37.9	-28.1	0.741425	6.5	1-8,195-188;10-15,186-181;16-21,178-173	9-9,187-187[SIL];x-x,180-179[BULt]	((((((..((((((.((((((((&)))))))).))))))--))))))	UCUCCAUGGCCAGGAAGCAUUCC&GGAAUGUUGUCUGGU--UGGAGA	0	0.0280656
miR167-3p.Cluster_3392	miR167-3p	Cluster_3392	AGGUCAUGUGGCAGCUUCAUU	miR167	Day3	HORVU.MOREX.r3.5HG0428840.1:2366	HORVU.MOREX.r3.5HG0428840.1	2355	2377	2366	-38.3	-28.4	0.741514	7	1-7,2377-2371;8-21,2368-2355	x-x,2370-2369[BULt]	((((((((((((((..(((((((&)))))))--))))))))))))))	GGUGAAGCUGUCACUGAUGACUU&AGGUCAU--GUGGCAGCUUCAUU	1	0.030427
miR167-3p.Cluster_4715	miR167-3p	Cluster_4715	AGAUCAUGCUGCAGCUUCAUU	miR167	Day0	HORVU.MOREX.r3.7HG0636350.1:2907	HORVU.MOREX.r3.7HG0636350.1	2895	2916	2907	-36.3	-26.2	0.721763	8	2-5,2915-2912;8-11,2909-2906;12-21,2904-2895	1-1,2916-2916[UP5];6-7,2911-2910[SIL];x-x,2905-2905[BULt]	((((((((((.((((..((((.&.))))..))))-))))))))))	GAUGGAGCUGACAGCCAGAUCA&AGAUCAUGCUG-CAGCUUCAUU	1	0.0396295
miR167-5p.Cluster_3392.Cluster_3623	miR167-5p	Cluster_3392.Cluster_3623	UGAAGCUGCCAGCAUGAUCUGA	miR167	Dry	HORVU.MOREX.r3.7HG0698540.1:676	HORVU.MOREX.r3.7HG0698540.1	664	685	676	-42.1	-30.3	0.719715	5	2-8,684-678;10-13,676-673;15-22,671-664	1-1,685-685[UP5];9-9,677-677[SIL];14-14,672-672[SIL]	((((((((.((((.(((((((.&.))))))).)))).))))))))	UCAGAUCAGGCUGACGGCUUCG&UGAAGCUGCCAGCAUGAUCUGA	0	0.00846406
miR167-5p.Cluster_3392.Cluster_3623	miR167-5p	Cluster_3392.Cluster_3623	UGAAGCUGCCAGCAUGAUCUGA	miR167	Day1	HORVU.MOREX.r3.7HG0698540.1:676	HORVU.MOREX.r3.7HG0698540.1	664	685	676	-42.1	-30.3	0.719715	5	2-8,684-678;10-13,676-673;15-22,671-664	1-1,685-685[UP5];9-9,677-677[SIL];14-14,672-672[SIL]	((((((((.((((.(((((((.&.))))))).)))).))))))))	UCAGAUCAGGCUGACGGCUUCG&UGAAGCUGCCAGCAUGAUCUGA	0	0.00972432
miR167-5p.Cluster_3392.Cluster_3623	miR167-5p	Cluster_3392.Cluster_3623	UGAAGCUGCCAGCAUGAUCUGA	miR167	Day3	HORVU.MOREX.r3.7HG0698540.1:676	HORVU.MOREX.r3.7HG0698540.1	664	685	676	-42.1	-30.3	0.719715	5	2-8,684-678;10-13,676-673;15-22,671-664	1-1,685-685[UP5];9-9,677-677[SIL];14-14,672-672[SIL]	((((((((.((((.(((((((.&.))))))).)))).))))))))	UCAGAUCAGGCUGACGGCUUCG&UGAAGCUGCCAGCAUGAUCUGA	0	0.0103795
miR167-5p.Cluster_3392.Cluster_3623	miR167-5p	Cluster_3392.Cluster_3623	UGAAGCUGCCAGCAUGAUCUGA	miR167	Day5	HORVU.MOREX.r3.7HG0698540.1:676	HORVU.MOREX.r3.7HG0698540.1	664	685	676	-42.1	-30.3	0.719715	5	2-8,684-678;10-13,676-673;15-22,671-664	1-1,685-685[UP5];9-9,677-677[SIL];14-14,672-672[SIL]	((((((((.((((.(((((((.&.))))))).)))).))))))))	UCAGAUCAGGCUGACGGCUUCG&UGAAGCUGCCAGCAUGAUCUGA	0	0.0105177
miR167-5p.Cluster_4244	miR167-5p	Cluster_4244	UGAAGCUGCCAGCAUGAUCU	miR167	Dry	HORVU.MOREX.r3.2HG0116230.1:736	HORVU.MOREX.r3.2HG0116230.1	726	747	736	-37.6	-26.8	0.712766	8	1-4,747-744;5-17,741-729	x-x,743-742[BULt];18-20,728-726[UP3]	...(((((((((((((..((((&))))--)))))))))))))...	CUCUCAUGCUGGCAGUCUUUCA&UGAA--GCUGCCAGCAUGAUCU	0	0.0406319
miR167-5p.Cluster_4244	miR167-5p	Cluster_4244	UGAAGCUGCCAGCAUGAUCU	miR167	Dry	HORVU.MOREX.r3.6HG0566320.1:2534	HORVU.MOREX.r3.6HG0566320.1	2524	2543	2534	-37.6	-30.6	0.81383	4	3-13,2541-2531;15-20,2529-2524	1-2,2543-2542[UP5];14-14,2530-2530[SIL]	((((((.(((((((((((..&..))))))))))).))))))	AGAUCAGGCUGGCAGCUUGU&UGAAGCUGCCAGCAUGAUCU	0	0.00135909
miR167-5p.Cluster_4244	miR167-5p	Cluster_4244	UGAAGCUGCCAGCAUGAUCU	miR167	Dry	HORVU.MOREX.r3.7HG0735280.1:2453	HORVU.MOREX.r3.7HG0735280.1	2443	2462	2453	-37.6	-30.6	0.81383	4	3-13,2460-2450;15-20,2448-2443	1-2,2462-2461[UP5];14-14,2449-2449[SIL]	((((((.(((((((((((..&..))))))))))).))))))	AGAUCAGGCUGGCAGCUUGU&UGAAGCUGCCAGCAUGAUCU	0	0.00101949
miR167-5p.Cluster_4244	miR167-5p	Cluster_4244	UGAAGCUGCCAGCAUGAUCU	miR167	Day1	HORVU.MOREX.r3.6HG0566320.1:2534	HORVU.MOREX.r3.6HG0566320.1	2524	2543	2534	-37.6	-30.6	0.81383	4	3-13,2541-2531;15-20,2529-2524	1-2,2543-2542[UP5];14-14,2530-2530[SIL]	((((((.(((((((((((..&..))))))))))).))))))	AGAUCAGGCUGGCAGCUUGU&UGAAGCUGCCAGCAUGAUCU	0	0.000813994
miR167-5p.Cluster_4244	miR167-5p	Cluster_4244	UGAAGCUGCCAGCAUGAUCU	miR167	Day1	HORVU.MOREX.r3.7HG0735280.1:2453	HORVU.MOREX.r3.7HG0735280.1	2443	2462	2453	-37.6	-30.6	0.81383	4	3-13,2460-2450;15-20,2448-2443	1-2,2462-2461[UP5];14-14,2449-2449[SIL]	((((((.(((((((((((..&..))))))))))).))))))	AGAUCAGGCUGGCAGCUUGU&UGAAGCUGCCAGCAUGAUCU	0	0.00122074
miR167-5p.Cluster_4244	miR167-5p	Cluster_4244	UGAAGCUGCCAGCAUGAUCU	miR167	Day3	HORVU.MOREX.r3.6HG0566320.1:2534	HORVU.MOREX.r3.6HG0566320.1	2524	2543	2534	-37.6	-30.6	0.81383	4	3-13,2541-2531;15-20,2529-2524	1-2,2543-2542[UP5];14-14,2530-2530[SIL]	((((((.(((((((((((..&..))))))))))).))))))	AGAUCAGGCUGGCAGCUUGU&UGAAGCUGCCAGCAUGAUCU	0	0.00160391
miR167-5p.Cluster_4244	miR167-5p	Cluster_4244	UGAAGCUGCCAGCAUGAUCU	miR167	Day3	HORVU.MOREX.r3.7HG0735280.1:2453	HORVU.MOREX.r3.7HG0735280.1	2443	2462	2453	-37.6	-30.6	0.81383	4	3-13,2460-2450;15-20,2448-2443	1-2,2462-2461[UP5];14-14,2449-2449[SIL]	((((((.(((((((((((..&..))))))))))).))))))	AGAUCAGGCUGGCAGCUUGU&UGAAGCUGCCAGCAUGAUCU	0	0.00120317
miR167-5p.Cluster_4244	miR167-5p	Cluster_4244	UGAAGCUGCCAGCAUGAUCU	miR167	Day5	HORVU.MOREX.r3.6HG0566320.1:2534	HORVU.MOREX.r3.6HG0566320.1	2524	2543	2534	-37.6	-30.6	0.81383	4	3-13,2541-2531;15-20,2529-2524	1-2,2543-2542[UP5];14-14,2530-2530[SIL]	((((((.(((((((((((..&..))))))))))).))))))	AGAUCAGGCUGGCAGCUUGU&UGAAGCUGCCAGCAUGAUCU	0	0.00162536
miR167-5p.Cluster_4244	miR167-5p	Cluster_4244	UGAAGCUGCCAGCAUGAUCU	miR167	Day5	HORVU.MOREX.r3.7HG0735280.1:2453	HORVU.MOREX.r3.7HG0735280.1	2443	2462	2453	-37.6	-30.6	0.81383	4	3-13,2460-2450;15-20,2448-2443	1-2,2462-2461[UP5];14-14,2449-2449[SIL]	((((((.(((((((((((..&..))))))))))).))))))	AGAUCAGGCUGGCAGCUUGU&UGAAGCUGCCAGCAUGAUCU	0	0.00121927
miR168-3p.Cluster_4564	miR168-3p	Cluster_4564	CCCGCCUUGCACCAAGUGAAU	miR168	Day5	HORVU.MOREX.r3.6HG0540130.1:53	HORVU.MOREX.r3.6HG0540130.1	41	63	53	-41	-28.5	0.695122	7.5	1-3,63-61;4-6,59-57;8-13,55-50;15-20,47-42	x-x,60-60[BULt];7-7,56-56[SIL];14-14,49-48[AILt];21-21,41-41[UP3]	.((((((..((((((.(((.(((&)))-))).))))))-.)))))).	UUUCGCUGAGGUGCACGGCUGGG&CCC-GCCUUGCACC-AAGUGAAU	0	0.043748
miR171-3p.Cluster_1682	miR171-3p	Cluster_1682	UUGAGCCGUGCCAAUAUCACG	miR171	Day0	HORVU.MOREX.r3.1HG0055960.1:1219	HORVU.MOREX.r3.1HG0055960.1	1208	1228	1219	-38.7	-34.7	0.896641	2	1-18,1228-1211;20-21,1209-1208	19-19,1210-1210[SIL]	((.((((((((((((((((((&)))))))))))))))))).))	CGAGAUAUUGGCGCGGCUCAA&UUGAGCCGUGCCAAUAUCACG	0	0.00122726
miR171-3p.Cluster_1682	miR171-3p	Cluster_1682	UUGAGCCGUGCCAAUAUCACG	miR171	Day0	HORVU.MOREX.r3.4HG0415480.1:1035	HORVU.MOREX.r3.4HG0415480.1	1024	1044	1035	-38.7	-35.1	0.906977	1	1-18,1044-1027;20-21,1025-1024	19-19,1026-1026[SIL]	((.((((((((((((((((((&)))))))))))))))))).))	CGAGAUAUUGGCACGGCUCAA&UUGAGCCGUGCCAAUAUCACG	0	0.000409254
miR171-3p.Cluster_1682	miR171-3p	Cluster_1682	UUGAGCCGUGCCAAUAUCACG	miR171	Day0	HORVU.MOREX.r3.6HG0601750.1:1240	HORVU.MOREX.r3.6HG0601750.1	1227	1249	1240	-38.7	-35	0.904393	3	1-16,1249-1234;17-21,1231-1227	x-x,1233-1232[BULt]	(((((..((((((((((((((((&))))))))))))))))--)))))	CGUGAGAUAUUGGCGCGGCUCAA&UUGAGCCGUGCCAAUA--UCACG	0	0.000818341
miR171-3p.Cluster_1682	miR171-3p	Cluster_1682	UUGAGCCGUGCCAAUAUCACG	miR171	Day1	HORVU.MOREX.r3.1HG0055960.1:1219	HORVU.MOREX.r3.1HG0055960.1	1208	1228	1219	-38.7	-34.7	0.896641	2	1-18,1228-1211;20-21,1209-1208	19-19,1210-1210[SIL]	((.((((((((((((((((((&)))))))))))))))))).))	CGAGAUAUUGGCGCGGCUCAA&UUGAGCCGUGCCAAUAUCACG	0	0.00162733
miR171-3p.Cluster_1682	miR171-3p	Cluster_1682	UUGAGCCGUGCCAAUAUCACG	miR171	Day1	HORVU.MOREX.r3.6HG0601750.1:1240	HORVU.MOREX.r3.6HG0601750.1	1227	1249	1240	-38.7	-35	0.904393	3	1-16,1249-1234;17-21,1231-1227	x-x,1233-1232[BULt]	(((((..((((((((((((((((&))))))))))))))))--)))))	CGUGAGAUAUUGGCGCGGCUCAA&UUGAGCCGUGCCAAUA--UCACG	0	0.000813994
miR171-3p.Cluster_1682	miR171-3p	Cluster_1682	UUGAGCCGUGCCAAUAUCACG	miR171	Day3	HORVU.MOREX.r3.1HG0055960.1:1219	HORVU.MOREX.r3.1HG0055960.1	1208	1228	1219	-38.7	-34.7	0.896641	2	1-18,1228-1211;20-21,1209-1208	19-19,1210-1210[SIL]	((.((((((((((((((((((&)))))))))))))))))).))	CGAGAUAUUGGCGCGGCUCAA&UUGAGCCGUGCCAAUAUCACG	0	0.00160391
miR171-3p.Cluster_1682	miR171-3p	Cluster_1682	UUGAGCCGUGCCAAUAUCACG	miR171	Day3	HORVU.MOREX.r3.6HG0601750.1:1240	HORVU.MOREX.r3.6HG0601750.1	1227	1249	1240	-38.7	-35	0.904393	3	1-16,1249-1234;17-21,1231-1227	x-x,1233-1232[BULt]	(((((..((((((((((((((((&))))))))))))))))--)))))	CGUGAGAUAUUGGCGCGGCUCAA&UUGAGCCGUGCCAAUA--UCACG	0	0.000802277
miR171-3p.Cluster_1682	miR171-3p	Cluster_1682	UUGAGCCGUGCCAAUAUCACG	miR171	Day5	HORVU.MOREX.r3.1HG0055960.1:1219	HORVU.MOREX.r3.1HG0055960.1	1208	1228	1219	-38.7	-34.7	0.896641	2	1-18,1228-1211;20-21,1209-1208	19-19,1210-1210[SIL]	((.((((((((((((((((((&)))))))))))))))))).))	CGAGAUAUUGGCGCGGCUCAA&UUGAGCCGUGCCAAUAUCACG	0	0.00162536
miR171-3p.Cluster_1682	miR171-3p	Cluster_1682	UUGAGCCGUGCCAAUAUCACG	miR171	Day5	HORVU.MOREX.r3.6HG0601750.1:1240	HORVU.MOREX.r3.6HG0601750.1	1227	1249	1240	-38.7	-35	0.904393	3	1-16,1249-1234;17-21,1231-1227	x-x,1233-1232[BULt]	(((((..((((((((((((((((&))))))))))))))))--)))))	CGUGAGAUAUUGGCGCGGCUCAA&UUGAGCCGUGCCAAUA--UCACG	0	0.000813012
miR171-3p.Cluster_3461	miR171-3p	Cluster_3461	UGAUUGAGCCGUGCCAAUAUC	miR171	Dry	HORVU.MOREX.r3.4HG0415480.1:1038	HORVU.MOREX.r3.4HG0415480.1	1027	1047	1038	-37.5	-39.1	1	0	1-21,1047-1027	NA	(((((((((((((((((((((&)))))))))))))))))))))	GAUAUUGGCACGGCUCAAUCA&UGAUUGAGCCGUGCCAAUAUC	0	0.00101949
miR171-3p.Cluster_3461	miR171-3p	Cluster_3461	UGAUUGAGCCGUGCCAAUAUC	miR171	Dry	HORVU.MOREX.r3.7HG0635740.1:709	HORVU.MOREX.r3.7HG0635740.1	698	718	709	-37.5	-38.7	1	1	1-21,718-698	NA	(((((((((((((((((((((&)))))))))))))))))))))	GAUAUUGGCGCGGCUCAAUCA&UGAUUGAGCCGUGCCAAUAUC	0	0.000339945
miR171-3p.Cluster_3461	miR171-3p	Cluster_3461	UGAUUGAGCCGUGCCAAUAUC	miR171	Day1	HORVU.MOREX.r3.4HG0415480.1:1038	HORVU.MOREX.r3.4HG0415480.1	1027	1047	1038	-37.5	-39.1	1	0	1-21,1047-1027	NA	(((((((((((((((((((((&)))))))))))))))))))))	GAUAUUGGCACGGCUCAAUCA&UGAUUGAGCCGUGCCAAUAUC	0	0.00040708
miR171-3p.Cluster_3461	miR171-3p	Cluster_3461	UGAUUGAGCCGUGCCAAUAUC	miR171	Day3	HORVU.MOREX.r3.4HG0415480.1:1038	HORVU.MOREX.r3.4HG0415480.1	1027	1047	1038	-37.5	-39.1	1	0	1-21,1047-1027	NA	(((((((((((((((((((((&)))))))))))))))))))))	GAUAUUGGCACGGCUCAAUCA&UGAUUGAGCCGUGCCAAUAUC	0	0.000401219
miR171-3p.Cluster_3461	miR171-3p	Cluster_3461	UGAUUGAGCCGUGCCAAUAUC	miR171	Day5	HORVU.MOREX.r3.4HG0415480.1:1038	HORVU.MOREX.r3.4HG0415480.1	1027	1047	1038	-37.5	-39.1	1	0	1-21,1047-1027	NA	(((((((((((((((((((((&)))))))))))))))))))))	GAUAUUGGCACGGCUCAAUCA&UGAUUGAGCCGUGCCAAUAUC	0	0.000813012
miR171-3p.Cluster_3461	miR171-3p	Cluster_3461	UGAUUGAGCCGUGCCAAUAUC	miR171	Day5	HORVU.MOREX.r3.7HG0635740.1:709	HORVU.MOREX.r3.7HG0635740.1	698	718	709	-37.5	-38.7	1	1	1-21,718-698	NA	(((((((((((((((((((((&)))))))))))))))))))))	GAUAUUGGCGCGGCUCAAUCA&UGAUUGAGCCGUGCCAAUAUC	0	0.000406588
miR171-3p.Cluster_456	miR171-3p	Cluster_456	UGAUUGAGCCGCGCCAAUAUC	miR171	Day0	HORVU.MOREX.r3.7HG0635740.1:709	HORVU.MOREX.r3.7HG0635740.1	698	718	709	-39	-40.6	1	0	1-21,718-698	NA	(((((((((((((((((((((&)))))))))))))))))))))	GAUAUUGGCGCGGCUCAAUCA&UGAUUGAGCCGCGCCAAUAUC	0	0.000409254
miR171-3p.Cluster_456	miR171-3p	Cluster_456	UGAUUGAGCCGCGCCAAUAUC	miR171	Day1	HORVU.MOREX.r3.7HG0635740.1:709	HORVU.MOREX.r3.7HG0635740.1	698	718	709	-39	-40.6	1	0	1-21,718-698	NA	(((((((((((((((((((((&)))))))))))))))))))))	GAUAUUGGCGCGGCUCAAUCA&UGAUUGAGCCGCGCCAAUAUC	0	0.00040708
miR171-3p.Cluster_456	miR171-3p	Cluster_456	UGAUUGAGCCGCGCCAAUAUC	miR171	Day3	HORVU.MOREX.r3.7HG0635740.1:709	HORVU.MOREX.r3.7HG0635740.1	698	718	709	-39	-40.6	1	0	1-21,718-698	NA	(((((((((((((((((((((&)))))))))))))))))))))	GAUAUUGGCGCGGCUCAAUCA&UGAUUGAGCCGCGCCAAUAUC	0	0.000802277
miR319-3p.Cluster_2046	miR319-3p	Cluster_2046	UUGGACUGAAGGGUGCUCCCU	miR319	Dry	HORVU.MOREX.r3.2HG0142450.1:43	HORVU.MOREX.r3.2HG0142450.1	29	52	43	-43	-35.7	0.830233	5.5	2-13,51-40;14-20,36-30	1-1,52-52[UP5];x-x,39-37[BULt];21-21,29-29[UP3]	.(((((((...((((((((((((.&.))))))))))))---))))))).	CGGGGGCAGCCCCCUUCAGUCCAC&UUGGACUGAAGGG---UGCUCCCU	1	0.000509009
miR319-3p.Cluster_2046	miR319-3p	Cluster_2046	UUGGACUGAAGGGUGCUCCCU	miR319	Dry	HORVU.MOREX.r3.2HG0152890.1:1296	HORVU.MOREX.r3.2HG0152890.1	1286	1305	1296	-43	-36.3	0.844186	1.5	1-14,1305-1292;16-21,1291-1286	15-15,x-x[BULq]	((((((-((((((((((((((&)))))))))))))).))))))	AGGGGG-ACCCUUCAGUCCAA&UUGGACUGAAGGGUGCUCCCU	0	0.000679775
miR319-3p.Cluster_2046	miR319-3p	Cluster_2046	UUGGACUGAAGGGUGCUCCCU	miR319	Dry	HORVU.MOREX.r3.3HG0243310.1:924	HORVU.MOREX.r3.3HG0243310.1	910	933	924	-43	-31.04	0.72186	8.5	3-17,931-917;19-20,912-911	1-2,933-932[UP5];18-18,916-913[AILt];21-21,910-910[UP3]	.((....(((((((((((((((..&..)))))))))))))))---.)).	UGGCAGUGGCACCCUUCAGUCCUG&UUGGACUGAAGGGUGCU---CCCU	0	0.0151837
miR319-3p.Cluster_2046	miR319-3p	Cluster_2046	UUGGACUGAAGGGUGCUCCCU	miR319	Day0	HORVU.MOREX.r3.2HG0142450.1:43	HORVU.MOREX.r3.2HG0142450.1	29	52	43	-43	-35.7	0.830233	5.5	2-13,51-40;14-20,36-30	1-1,52-52[UP5];x-x,39-37[BULt];21-21,29-29[UP3]	.(((((((...((((((((((((.&.))))))))))))---))))))).	CGGGGGCAGCCCCCUUCAGUCCAC&UUGGACUGAAGGG---UGCUCCCU	0	0.00122726
miR319-3p.Cluster_2046	miR319-3p	Cluster_2046	UUGGACUGAAGGGUGCUCCCU	miR319	Day0	HORVU.MOREX.r3.2HG0152890.1:1296	HORVU.MOREX.r3.2HG0152890.1	1286	1305	1296	-43	-36.3	0.844186	1.5	1-14,1305-1292;16-21,1291-1286	15-15,x-x[BULq]	((((((-((((((((((((((&)))))))))))))).))))))	AGGGGG-ACCCUUCAGUCCAA&UUGGACUGAAGGGUGCUCCCU	0	0.000818341
miR319-3p.Cluster_2046	miR319-3p	Cluster_2046	UUGGACUGAAGGGUGCUCCCU	miR319	Day1	HORVU.MOREX.r3.2HG0152890.1:1296	HORVU.MOREX.r3.2HG0152890.1	1286	1305	1296	-43	-36.3	0.844186	1.5	1-14,1305-1292;16-21,1291-1286	15-15,x-x[BULq]	((((((-((((((((((((((&)))))))))))))).))))))	AGGGGG-ACCCUUCAGUCCAA&UUGGACUGAAGGGUGCUCCCU	0	0.000813994
miR319-3p.Cluster_2046	miR319-3p	Cluster_2046	UUGGACUGAAGGGUGCUCCCU	miR319	Day3	HORVU.MOREX.r3.2HG0096080.1:4166	HORVU.MOREX.r3.2HG0096080.1	4147	4176	4166	-43	-30.9	0.718605	13.5	3-5,4174-4172;6-14,4170-4162;15-21,4153-4147	1-2,4176-4175[UP5];x-x,4171-4171[BULt];x-x,4161-4154[BULt]	(((((((........(((((((((.(((..&..)))-)))))))))--------)))))))	AGGGAGCAAGAGGACGCCCUUCAGCUCCUC&UUGGA-CUGAAGGGU--------GCUCCCU	1	0.01367
miR319-3p.Cluster_2046	miR319-3p	Cluster_2046	UUGGACUGAAGGGUGCUCCCU	miR319	Day3	HORVU.MOREX.r3.2HG0152890.1:1296	HORVU.MOREX.r3.2HG0152890.1	1286	1305	1296	-43	-36.3	0.844186	1.5	1-14,1305-1292;16-21,1291-1286	15-15,x-x[BULq]	((((((-((((((((((((((&)))))))))))))).))))))	AGGGGG-ACCCUUCAGUCCAA&UUGGACUGAAGGGUGCUCCCU	0	0.000802277
miR319-3p.Cluster_2046	miR319-3p	Cluster_2046	UUGGACUGAAGGGUGCUCCCU	miR319	Day3	HORVU.MOREX.r3.3HG0243310.1:924	HORVU.MOREX.r3.3HG0243310.1	910	933	924	-43	-31.04	0.72186	8.5	3-17,931-917;19-20,912-911	1-2,933-932[UP5];18-18,916-913[AILt];21-21,910-910[UP3]	.((....(((((((((((((((..&..)))))))))))))))---.)).	UGGCAGUGGCACCCUUCAGUCCUG&UUGGACUGAAGGGUGCU---CCCU	0	0.0178964
miR393-5p.Cluster_1822	miR393-5p	Cluster_1822	UUCCAAAGGGAUCGCAUUGAU	miR393	Day3	HORVU.MOREX.r3.5HG0482600.1:2747	HORVU.MOREX.r3.5HG0482600.1	2737	2756	2747	-35.6	-25.1	0.705056	6	2-5,2755-2752;7-15,2750-2742;17-21,2741-2737	1-1,2756-2756[UP5];6-6,2751-2751[SIL];16-16,x-x[BULq]	(((((-(((((((((.((((.&.)))).))))))))).)))))	GUCAA-GUGGUCCCUCUGGAU&UUCCAAAGGGAUCGCAUUGAU	0	0.0159238
miR396-3p.Cluster_1803	miR396-3p	Cluster_1803	GUUCAAGAAAGCCCAUGGAAA	miR396	Dry	HORVU.MOREX.r3.1HG0017280.1:1227	HORVU.MOREX.r3.1HG0017280.1	1216	1237	1227	-35.2	-23.3	0.661932	10.5	1-7,1237-1231;10-18,1227-1219	8-9,1230-1228[AILt];19-21,1218-1216[UP3]	...(((((((((...(((((((&)))))))-..)))))))))...	UUCCCAUGGGUUGAACUUGAAU&GUUCAAG-AAAGCCCAUGGAAA	1	0.0447885
miR396-3p.Cluster_5480	miR396-3p	Cluster_5480	GUUCAAUAAAGCUGUGGGAAA	miR396	Day3	HORVU.MOREX.r3.1HG0065890.1:604	HORVU.MOREX.r3.1HG0065890.1	594	613	604	-33	-23.2	0.70303	8	4-14,610-600;16-20,599-595	1-3,613-611[UP5];15-15,x-x[BULq];21-21,594-594[UP3]	.(((((-(((((((((((...&...))))))))))).))))).	AUUCCC-CAGCUUUGUUGUCU&GUUCAAUAAAGCUGUGGGAAA	0	0.0190781
miR396-5p.Cluster_1803	miR396-5p	Cluster_1803	UCCACAGGCUUUCUUGAACUG	miR396	Dry	HORVU.MOREX.r3.2HG0193490.1:672	HORVU.MOREX.r3.2HG0193490.1	661	681	672	-37.4	-35.4	0.946524	2	1-19,681-663	20-21,662-661[UP3]	..(((((((((((((((((((&)))))))))))))))))))..	CCGUUCAAGAAAGCCUGUGGA&UCCACAGGCUUUCUUGAACUG	0	0.000339945
miR396-5p.Cluster_1803	miR396-5p	Cluster_1803	UCCACAGGCUUUCUUGAACUG	miR396	Dry	HORVU.MOREX.r3.6HG0603870.1:518	HORVU.MOREX.r3.6HG0603870.1	507	527	518	-37.4	-35.4	0.946524	2	1-19,527-509	20-21,508-507[UP3]	..(((((((((((((((((((&)))))))))))))))))))..	CCGUUCAAGAAAGCCUGUGGA&UCCACAGGCUUUCUUGAACUG	0	0.00271633
miR396-5p.Cluster_1803	miR396-5p	Cluster_1803	UCCACAGGCUUUCUUGAACUG	miR396	Dry	HORVU.MOREX.r3.7HG0641080.2:643	HORVU.MOREX.r3.7HG0641080.2	632	652	643	-37.4	-35.4	0.946524	2	1-19,652-634	20-21,633-632[UP3]	..(((((((((((((((((((&)))))))))))))))))))..	CCGUUCAAGAAAGCCUGUGGA&UCCACAGGCUUUCUUGAACUG	0	0.00305535
miR396-5p.Cluster_1803	miR396-5p	Cluster_1803	UCCACAGGCUUUCUUGAACUG	miR396	Dry	HORVU.MOREX.r3.7HG0642820.1:1296	HORVU.MOREX.r3.7HG0642820.1	1285	1316	1296	-37.4	-25.24	0.674866	26	1-5,1316-1312;8-21,1298-1285	6-7,1311-1299[AILt]	((((((((((((((.............(((((&)))))-----------..))))))))))))))	CAGUUCAAGAAAGCGGGCAAGAAAAGGGUGGA&UCCAC-----------AGGCUUUCUUGAACUG	1	0.0343568
miR396-5p.Cluster_1803	miR396-5p	Cluster_1803	UCCACAGGCUUUCUUGAACUG	miR396	Dry	HORVU.MOREX.r3.7HG0662690.1:386	HORVU.MOREX.r3.7HG0662690.1	375	395	386	-37.4	-35.4	0.946524	2	1-19,395-377	20-21,376-375[UP3]	..(((((((((((((((((((&)))))))))))))))))))..	CCGUUCAAGAAAGCCUGUGGA&UCCACAGGCUUUCUUGAACUG	0	0.000679775
miR396-5p.Cluster_1803	miR396-5p	Cluster_1803	UCCACAGGCUUUCUUGAACUG	miR396	Day0	HORVU.MOREX.r3.2HG0193490.1:672	HORVU.MOREX.r3.2HG0193490.1	661	681	672	-37.4	-35.4	0.946524	2	1-19,681-663	20-21,662-661[UP3]	..(((((((((((((((((((&)))))))))))))))))))..	CCGUUCAAGAAAGCCUGUGGA&UCCACAGGCUUUCUUGAACUG	0	0.00122726
miR396-5p.Cluster_1803	miR396-5p	Cluster_1803	UCCACAGGCUUUCUUGAACUG	miR396	Day0	HORVU.MOREX.r3.6HG0603870.1:518	HORVU.MOREX.r3.6HG0603870.1	507	527	518	-37.4	-35.4	0.946524	2	1-19,527-509	20-21,508-507[UP3]	..(((((((((((((((((((&)))))))))))))))))))..	CCGUUCAAGAAAGCCUGUGGA&UCCACAGGCUUUCUUGAACUG	0	0.00163601
miR396-5p.Cluster_1803	miR396-5p	Cluster_1803	UCCACAGGCUUUCUUGAACUG	miR396	Day0	HORVU.MOREX.r3.6HG0606810.1:482	HORVU.MOREX.r3.6HG0606810.1	471	491	482	-37.4	-35.4	0.946524	2	1-19,491-473	20-21,472-471[UP3]	..(((((((((((((((((((&)))))))))))))))))))..	CCGUUCAAGAAAGCCUGUGGA&UCCACAGGCUUUCUUGAACUG	0	0.00326935
miR396-5p.Cluster_1803	miR396-5p	Cluster_1803	UCCACAGGCUUUCUUGAACUG	miR396	Day0	HORVU.MOREX.r3.7HG0641080.1:663	HORVU.MOREX.r3.7HG0641080.1	652	672	663	-37.4	-35.4	0.946524	2	1-19,672-654	20-21,653-652[UP3]	..(((((((((((((((((((&)))))))))))))))))))..	CCGUUCAAGAAAGCCUGUGGA&UCCACAGGCUUUCUUGAACUG	0	0.00286126
miR396-5p.Cluster_1803	miR396-5p	Cluster_1803	UCCACAGGCUUUCUUGAACUG	miR396	Day0	HORVU.MOREX.r3.7HG0641080.2:643	HORVU.MOREX.r3.7HG0641080.2	632	652	643	-37.4	-35.4	0.946524	2	1-19,652-634	20-21,633-632[UP3]	..(((((((((((((((((((&)))))))))))))))))))..	CCGUUCAAGAAAGCCUGUGGA&UCCACAGGCUUUCUUGAACUG	0	0.00367726
miR396-5p.Cluster_1803	miR396-5p	Cluster_1803	UCCACAGGCUUUCUUGAACUG	miR396	Day0	HORVU.MOREX.r3.7HG0662690.1:386	HORVU.MOREX.r3.7HG0662690.1	375	395	386	-37.4	-35.4	0.946524	2	1-19,395-377	20-21,376-375[UP3]	..(((((((((((((((((((&)))))))))))))))))))..	CCGUUCAAGAAAGCCUGUGGA&UCCACAGGCUUUCUUGAACUG	0	0.000818341
miR396-5p.Cluster_1803	miR396-5p	Cluster_1803	UCCACAGGCUUUCUUGAACUG	miR396	Day1	HORVU.MOREX.r3.2HG0193490.1:672	HORVU.MOREX.r3.2HG0193490.1	661	681	672	-37.4	-35.4	0.946524	2	1-19,681-663	20-21,662-661[UP3]	..(((((((((((((((((((&)))))))))))))))))))..	CCGUUCAAGAAAGCCUGUGGA&UCCACAGGCUUUCUUGAACUG	0	0.003252
miR396-5p.Cluster_1803	miR396-5p	Cluster_1803	UCCACAGGCUUUCUUGAACUG	miR396	Day1	HORVU.MOREX.r3.4HG0334080.1:668	HORVU.MOREX.r3.4HG0334080.1	657	677	668	-37.4	-35.4	0.946524	2	1-19,677-659	20-21,658-657[UP3]	..(((((((((((((((((((&)))))))))))))))))))..	UCGUUCAAGAAAGCCUGUGGA&UCCACAGGCUUUCUUGAACUG	0	0.00122074
miR396-5p.Cluster_1803	miR396-5p	Cluster_1803	UCCACAGGCUUUCUUGAACUG	miR396	Day1	HORVU.MOREX.r3.6HG0603870.1:518	HORVU.MOREX.r3.6HG0603870.1	507	527	518	-37.4	-35.4	0.946524	2	1-19,527-509	20-21,508-507[UP3]	..(((((((((((((((((((&)))))))))))))))))))..	CCGUUCAAGAAAGCCUGUGGA&UCCACAGGCUUUCUUGAACUG	0	0.000813994
miR396-5p.Cluster_1803	miR396-5p	Cluster_1803	UCCACAGGCUUUCUUGAACUG	miR396	Day1	HORVU.MOREX.r3.6HG0606810.1:482	HORVU.MOREX.r3.6HG0606810.1	471	491	482	-37.4	-35.4	0.946524	2	1-19,491-473	20-21,472-471[UP3]	..(((((((((((((((((((&)))))))))))))))))))..	CCGUUCAAGAAAGCCUGUGGA&UCCACAGGCUUUCUUGAACUG	0	0.00040708
miR396-5p.Cluster_1803	miR396-5p	Cluster_1803	UCCACAGGCUUUCUUGAACUG	miR396	Day1	HORVU.MOREX.r3.7HG0641080.1:663	HORVU.MOREX.r3.7HG0641080.1	652	672	663	-37.4	-35.4	0.946524	2	1-19,672-654	20-21,653-652[UP3]	..(((((((((((((((((((&)))))))))))))))))))..	CCGUUCAAGAAAGCCUGUGGA&UCCACAGGCUUUCUUGAACUG	0	0.00203374
miR396-5p.Cluster_1803	miR396-5p	Cluster_1803	UCCACAGGCUUUCUUGAACUG	miR396	Day1	HORVU.MOREX.r3.7HG0641080.2:643	HORVU.MOREX.r3.7HG0641080.2	632	652	643	-37.4	-35.4	0.946524	2	1-19,652-634	20-21,633-632[UP3]	..(((((((((((((((((((&)))))))))))))))))))..	CCGUUCAAGAAAGCCUGUGGA&UCCACAGGCUUUCUUGAACUG	0	0.00284608
miR396-5p.Cluster_1803	miR396-5p	Cluster_1803	UCCACAGGCUUUCUUGAACUG	miR396	Day1	HORVU.MOREX.r3.7HG0662690.1:386	HORVU.MOREX.r3.7HG0662690.1	375	395	386	-37.4	-35.4	0.946524	2	1-19,395-377	20-21,376-375[UP3]	..(((((((((((((((((((&)))))))))))))))))))..	CCGUUCAAGAAAGCCUGUGGA&UCCACAGGCUUUCUUGAACUG	0	0.00365776
miR396-5p.Cluster_1803	miR396-5p	Cluster_1803	UCCACAGGCUUUCUUGAACUG	miR396	Day3	HORVU.MOREX.r3.1HG0073090.1:3194	HORVU.MOREX.r3.1HG0073090.1	3183	3205	3194	-37.4	-27.4	0.73262	9	1-3,3205-3203;4-9,3200-3195;12-20,3192-3184	x-x,3202-3201[BULt];10-11,3194-3193[SIL];21-21,3183-3183[UP3]	.(((((((((..((((((..(((&)))--))))))..))))))))).	GAGUUCAAGAUUGCCUGUCUGGA&UCC--ACAGGCUUUCUUGAACUG	0	0.0171079
miR396-5p.Cluster_1803	miR396-5p	Cluster_1803	UCCACAGGCUUUCUUGAACUG	miR396	Day3	HORVU.MOREX.r3.1HG0073090.2:3278	HORVU.MOREX.r3.1HG0073090.2	3267	3289	3278	-37.4	-27.4	0.73262	9	1-3,3289-3287;4-9,3284-3279;12-20,3276-3268	x-x,3286-3285[BULt];10-11,3278-3277[SIL];21-21,3267-3267[UP3]	.(((((((((..((((((..(((&)))--))))))..))))))))).	GAGUUCAAGAUUGCCUGUCUGGA&UCC--ACAGGCUUUCUUGAACUG	0	0.0159238
miR396-5p.Cluster_1803	miR396-5p	Cluster_1803	UCCACAGGCUUUCUUGAACUG	miR396	Day3	HORVU.MOREX.r3.2HG0186750.1:597	HORVU.MOREX.r3.2HG0186750.1	586	606	597	-37.4	-35.4	0.946524	2	1-19,606-588	20-21,587-586[UP3]	..(((((((((((((((((((&)))))))))))))))))))..	CCGUUCAAGAAAGCCUGUGGA&UCCACAGGCUUUCUUGAACUG	0	0.00160391
miR396-5p.Cluster_1803	miR396-5p	Cluster_1803	UCCACAGGCUUUCUUGAACUG	miR396	Day3	HORVU.MOREX.r3.2HG0193490.1:672	HORVU.MOREX.r3.2HG0193490.1	661	681	672	-37.4	-35.4	0.946524	2	1-19,681-663	20-21,662-661[UP3]	..(((((((((((((((((((&)))))))))))))))))))..	CCGUUCAAGAAAGCCUGUGGA&UCCACAGGCUUUCUUGAACUG	0	0.000401219
miR396-5p.Cluster_1803	miR396-5p	Cluster_1803	UCCACAGGCUUUCUUGAACUG	miR396	Day3	HORVU.MOREX.r3.4HG0334080.1:668	HORVU.MOREX.r3.4HG0334080.1	657	677	668	-37.4	-35.4	0.946524	2	1-19,677-659	20-21,658-657[UP3]	..(((((((((((((((((((&)))))))))))))))))))..	UCGUUCAAGAAAGCCUGUGGA&UCCACAGGCUUUCUUGAACUG	0	0.000802277
miR396-5p.Cluster_1803	miR396-5p	Cluster_1803	UCCACAGGCUUUCUUGAACUG	miR396	Day3	HORVU.MOREX.r3.6HG0603870.1:518	HORVU.MOREX.r3.6HG0603870.1	507	527	518	-37.4	-35.4	0.946524	2	1-19,527-509	20-21,508-507[UP3]	..(((((((((((((((((((&)))))))))))))))))))..	CCGUUCAAGAAAGCCUGUGGA&UCCACAGGCUUUCUUGAACUG	0	0.00120317
miR396-5p.Cluster_1803	miR396-5p	Cluster_1803	UCCACAGGCUUUCUUGAACUG	miR396	Day3	HORVU.MOREX.r3.6HG0606810.1:482	HORVU.MOREX.r3.6HG0606810.1	471	491	482	-37.4	-35.4	0.946524	2	1-19,491-473	20-21,472-471[UP3]	..(((((((((((((((((((&)))))))))))))))))))..	CCGUUCAAGAAAGCCUGUGGA&UCCACAGGCUUUCUUGAACUG	0	0.0024049
miR396-5p.Cluster_1803	miR396-5p	Cluster_1803	UCCACAGGCUUUCUUGAACUG	miR396	Day3	HORVU.MOREX.r3.7HG0641080.1:663	HORVU.MOREX.r3.7HG0641080.1	652	672	663	-37.4	-35.4	0.946524	2	1-19,672-654	20-21,653-652[UP3]	..(((((((((((((((((((&)))))))))))))))))))..	CCGUUCAAGAAAGCCUGUGGA&UCCACAGGCUUUCUUGAACUG	0	0.00320525
miR396-5p.Cluster_1803	miR396-5p	Cluster_1803	UCCACAGGCUUUCUUGAACUG	miR396	Day3	HORVU.MOREX.r3.7HG0641080.2:643	HORVU.MOREX.r3.7HG0641080.2	632	652	643	-37.4	-35.4	0.946524	2	1-19,652-634	20-21,633-632[UP3]	..(((((((((((((((((((&)))))))))))))))))))..	CCGUUCAAGAAAGCCUGUGGA&UCCACAGGCUUUCUUGAACUG	0	0.00280516
miR396-5p.Cluster_1803	miR396-5p	Cluster_1803	UCCACAGGCUUUCUUGAACUG	miR396	Day3	HORVU.MOREX.r3.7HG0662690.1:386	HORVU.MOREX.r3.7HG0662690.1	375	395	386	-37.4	-35.4	0.946524	2	1-19,395-377	20-21,376-375[UP3]	..(((((((((((((((((((&)))))))))))))))))))..	CCGUUCAAGAAAGCCUGUGGA&UCCACAGGCUUUCUUGAACUG	0	0.00360518
miR396-5p.Cluster_1803	miR396-5p	Cluster_1803	UCCACAGGCUUUCUUGAACUG	miR396	Day5	HORVU.MOREX.r3.1HG0073090.1:3194	HORVU.MOREX.r3.1HG0073090.1	3183	3205	3194	-37.4	-27.4	0.73262	9	1-3,3205-3203;4-9,3200-3195;12-20,3192-3184	x-x,3202-3201[BULt];10-11,3194-3193[SIL];21-21,3183-3183[UP3]	.(((((((((..((((((..(((&)))--))))))..))))))))).	GAGUUCAAGAUUGCCUGUCUGGA&UCC--ACAGGCUUUCUUGAACUG	0	0.0177344
miR396-5p.Cluster_1803	miR396-5p	Cluster_1803	UCCACAGGCUUUCUUGAACUG	miR396	Day5	HORVU.MOREX.r3.2HG0186750.1:597	HORVU.MOREX.r3.2HG0186750.1	586	606	597	-37.4	-35.4	0.946524	2	1-19,606-588	20-21,587-586[UP3]	..(((((((((((((((((((&)))))))))))))))))))..	CCGUUCAAGAAAGCCUGUGGA&UCCACAGGCUUUCUUGAACUG	0	0.000406588
miR396-5p.Cluster_1803	miR396-5p	Cluster_1803	UCCACAGGCUUUCUUGAACUG	miR396	Day5	HORVU.MOREX.r3.2HG0193490.1:672	HORVU.MOREX.r3.2HG0193490.1	661	681	672	-37.4	-35.4	0.946524	2	1-19,681-663	20-21,662-661[UP3]	..(((((((((((((((((((&)))))))))))))))))))..	CCGUUCAAGAAAGCCUGUGGA&UCCACAGGCUUUCUUGAACUG	0	0.00284265
miR396-5p.Cluster_1803	miR396-5p	Cluster_1803	UCCACAGGCUUUCUUGAACUG	miR396	Day5	HORVU.MOREX.r3.6HG0603870.1:518	HORVU.MOREX.r3.6HG0603870.1	507	527	518	-37.4	-35.4	0.946524	2	1-19,527-509	20-21,508-507[UP3]	..(((((((((((((((((((&)))))))))))))))))))..	CCGUUCAAGAAAGCCUGUGGA&UCCACAGGCUUUCUUGAACUG	0	0.00203129
miR396-5p.Cluster_1803	miR396-5p	Cluster_1803	UCCACAGGCUUUCUUGAACUG	miR396	Day5	HORVU.MOREX.r3.6HG0606810.1:482	HORVU.MOREX.r3.6HG0606810.1	471	491	482	-37.4	-35.4	0.946524	2	1-19,491-473	20-21,472-471[UP3]	..(((((((((((((((((((&)))))))))))))))))))..	CCGUUCAAGAAAGCCUGUGGA&UCCACAGGCUUUCUUGAACUG	0	0.00365335
miR396-5p.Cluster_1803	miR396-5p	Cluster_1803	UCCACAGGCUUUCUUGAACUG	miR396	Day5	HORVU.MOREX.r3.6HG0620090.1:561	HORVU.MOREX.r3.6HG0620090.1	550	570	561	-37.4	-35.4	0.946524	2	1-19,570-552	20-21,551-550[UP3]	..(((((((((((((((((((&)))))))))))))))))))..	CCGUUCAAGAAAGCCUGUGGA&UCCACAGGCUUUCUUGAACUG	0	0.000813012
miR396-5p.Cluster_1803	miR396-5p	Cluster_1803	UCCACAGGCUUUCUUGAACUG	miR396	Day5	HORVU.MOREX.r3.7HG0641080.1:663	HORVU.MOREX.r3.7HG0641080.1	652	672	663	-37.4	-35.4	0.946524	2	1-19,672-654	20-21,653-652[UP3]	..(((((((((((((((((((&)))))))))))))))))))..	CCGUUCAAGAAAGCCUGUGGA&UCCACAGGCUUUCUUGAACUG	0	0.00162536
miR396-5p.Cluster_1803	miR396-5p	Cluster_1803	UCCACAGGCUUUCUUGAACUG	miR396	Day5	HORVU.MOREX.r3.7HG0641080.2:643	HORVU.MOREX.r3.7HG0641080.2	632	652	643	-37.4	-35.4	0.946524	2	1-19,652-634	20-21,633-632[UP3]	..(((((((((((((((((((&)))))))))))))))))))..	CCGUUCAAGAAAGCCUGUGGA&UCCACAGGCUUUCUUGAACUG	0	0.00121927
miR396-5p.Cluster_1803	miR396-5p	Cluster_1803	UCCACAGGCUUUCUUGAACUG	miR396	Day5	HORVU.MOREX.r3.7HG0662690.1:386	HORVU.MOREX.r3.7HG0662690.1	375	395	386	-37.4	-35.4	0.946524	2	1-19,395-377	20-21,376-375[UP3]	..(((((((((((((((((((&)))))))))))))))))))..	CCGUUCAAGAAAGCCUGUGGA&UCCACAGGCUUUCUUGAACUG	0	0.00243705
miR396-5p.Cluster_5480	miR396-5p	Cluster_5480	UUCCACAGCUUUCUUGAACUG	miR396	Dry	HORVU.MOREX.r3.2HG0186750.1:597	HORVU.MOREX.r3.2HG0186750.1	586	607	597	-35.1	-29.2	0.831909	4	1-8,607-600;9-19,598-588	x-x,599-599[BULt];20-21,587-586[UP3]	..(((((((((((.((((((((&))))))))-)))))))))))..	CCGUUCAAGAAAGCCUGUGGAA&UUCCACAG-CUUUCUUGAACUG	0	0.00135909
miR396-5p.Cluster_5480	miR396-5p	Cluster_5480	UUCCACAGCUUUCUUGAACUG	miR396	Dry	HORVU.MOREX.r3.6HG0606810.1:482	HORVU.MOREX.r3.6HG0606810.1	471	492	482	-35.1	-29.2	0.831909	4	1-8,492-485;9-19,483-473	x-x,484-484[BULt];20-21,472-471[UP3]	..(((((((((((.((((((((&))))))))-)))))))))))..	CCGUUCAAGAAAGCCUGUGGAA&UUCCACAG-CUUUCUUGAACUG	0	0.00237719
miR396-5p.Cluster_5480	miR396-5p	Cluster_5480	UUCCACAGCUUUCUUGAACUG	miR396	Day1	HORVU.MOREX.r3.2HG0186750.1:597	HORVU.MOREX.r3.2HG0186750.1	586	607	597	-35.1	-29.2	0.831909	4	1-8,607-600;9-19,598-588	x-x,599-599[BULt];20-21,587-586[UP3]	..(((((((((((.((((((((&))))))))-)))))))))))..	CCGUUCAAGAAAGCCUGUGGAA&UUCCACAG-CUUUCUUGAACUG	0	0.00203374
miR396-5p.Cluster_5480	miR396-5p	Cluster_5480	UUCCACAGCUUUCUUGAACUG	miR396	Day3	HORVU.MOREX.r3.4HG0339430.1:932	HORVU.MOREX.r3.4HG0339430.1	921	942	932	-35.1	-29.2	0.831909	4	1-7,942-936;8-19,934-923	x-x,935-935[BULt];20-21,922-921[UP3]	..((((((((((((.(((((((&)))))))-))))))))))))..	UCGUUCAAGAAAGCAUGUGGAA&UUCCACA-GCUUUCUUGAACUG	0	0.00480402
miR396-5p.Cluster_5480	miR396-5p	Cluster_5480	UUCCACAGCUUUCUUGAACUG	miR396	Day3	HORVU.MOREX.r3.4HG0339430.2:752	HORVU.MOREX.r3.4HG0339430.2	741	762	752	-35.1	-29.2	0.831909	4	1-7,762-756;8-19,754-743	x-x,755-755[BULt];20-21,742-741[UP3]	..((((((((((((.(((((((&)))))))-))))))))))))..	UCGUUCAAGAAAGCAUGUGGAA&UUCCACA-GCUUUCUUGAACUG	0	0.00520331
miR396-5p.Cluster_5480	miR396-5p	Cluster_5480	UUCCACAGCUUUCUUGAACUG	miR396	Day3	HORVU.MOREX.r3.4HG0368070.1:580	HORVU.MOREX.r3.4HG0368070.1	569	590	580	-35.1	-29.2	0.831909	4	1-7,590-584;8-19,582-571	x-x,583-583[BULt];20-21,570-569[UP3]	..((((((((((((.(((((((&)))))))-))))))))))))..	ACGUUCAAGAAAGCAUGUGGAA&UUCCACA-GCUUUCUUGAACUG	0	0.0024049
miR396-5p.Cluster_5480	miR396-5p	Cluster_5480	UUCCACAGCUUUCUUGAACUG	miR396	Day3	HORVU.MOREX.r3.6HG0620090.1:561	HORVU.MOREX.r3.6HG0620090.1	550	571	561	-35.1	-29.2	0.831909	4	1-8,571-564;9-19,562-552	x-x,563-563[BULt];20-21,551-550[UP3]	..(((((((((((.((((((((&))))))))-)))))))))))..	CCGUUCAAGAAAGCCUGUGGAA&UUCCACAG-CUUUCUUGAACUG	0	0.00160391
miR396-5p.Cluster_5480	miR396-5p	Cluster_5480	UUCCACAGCUUUCUUGAACUG	miR396	Day5	HORVU.MOREX.r3.4HG0334080.1:668	HORVU.MOREX.r3.4HG0334080.1	657	678	668	-35.1	-29.2	0.831909	4	1-8,678-671;9-19,669-659	x-x,670-670[BULt];20-21,658-657[UP3]	..(((((((((((.((((((((&))))))))-)))))))))))..	UCGUUCAAGAAAGCCUGUGGAA&UUCCACAG-CUUUCUUGAACUG	0	0.00284265
miR396-5p.Cluster_5480	miR396-5p	Cluster_5480	UUCCACAGCUUUCUUGAACUG	miR396	Day5	HORVU.MOREX.r3.4HG0339430.2:752	HORVU.MOREX.r3.4HG0339430.2	741	762	752	-35.1	-29.2	0.831909	4	1-7,762-756;8-19,754-743	x-x,755-755[BULt];20-21,742-741[UP3]	..((((((((((((.(((((((&)))))))-))))))))))))..	UCGUUCAAGAAAGCAUGUGGAA&UUCCACA-GCUUUCUUGAACUG	0	0.00405845
miR6201-5p.Cluster_5317	miR6201-5p	Cluster_5317	UGACCCUGAGGCACUCAUACCG	miR6201	Day5	HORVU.MOREX.r3.3HG0319380.1:1012	HORVU.MOREX.r3.3HG0319380.1	1001	1021	1012	-45.3	-32.7	0.721854	4.5	1-13,1021-1009;16-16,1006-1006;18-22,1005-1001	14-15,1008-1007[SIL];17-17,x-x[BULq]	(((((-(..(((((((((((((&)))))))))))))..).)))))	CGGUG-GCUUGCCUCGGGGUCA&UGACCCUGAGGCACUCAUACCG	1	0.00223324
miR827-5p.Cluster_1545	miR827-5p	Cluster_1545	UUUUGUUGGUUGUCAUCUAACC	miR827	Day0	HORVU.MOREX.r3.3HG0279880.1:811	HORVU.MOREX.r3.3HG0279880.1	798	820	811	-34	-24.3	0.714706	11	5-19,816-802;21-22,799-798	1-4,820-817[UP5];20-20,801-800[AILt]	((..(((((((((((((((....&....)))))))))))))))-.))	GGACUGGAUGGCGACCAACUUCU&UUUUGUUGGUUGUCAUCUA-ACC	0	0.0420699
miR9662-3p.Cluster_4660	miR9662-3p	Cluster_4660	UUGAACAUCCCAGAGCCACCG	miR9662	Dry	HORVU.MOREX.r3.6HG0541280.1:802	HORVU.MOREX.r3.6HG0541280.1	791	811	802	-41.6	-28.3	0.680288	7	3-8,809-804;10-19,802-793	1-2,811-810[UP5];9-9,803-803[SIL];20-21,792-791[UP3]	..((((((((((.((((((..&..)))))).))))))))))..	CCGUGGCUCUGGAAUGUUCCG&UUGAACAUCCCAGAGCCACCG	1	0.0143221
miR9662-3p.Cluster_4660	miR9662-3p	Cluster_4660	UUGAACAUCCCAGAGCCACCG	miR9662	Dry	HORVU.MOREX.r3.6HG0541690.1:780	HORVU.MOREX.r3.6HG0541690.1	769	789	780	-41.6	-32.5	0.78125	4.5	1-11,789-779;13-19,777-771	12-12,778-778[SIL];20-21,770-769[UP3]	..(((((((.(((((((((((&))))))))))).)))))))..	CCGUGGCUCCGGGAUGUUCAG&UUGAACAUCCCAGAGCCACCG	0	0.00169857
miR9662-3p.Cluster_4660	miR9662-3p	Cluster_4660	UUGAACAUCCCAGAGCCACCG	miR9662	Dry	HORVU.MOREX.r3.6HG0543320.1:710	HORVU.MOREX.r3.6HG0543320.1	700	719	710	-41.6	-29.1	0.699519	4.5	1-8,719-712;10-17,710-703;19-20,702-701	9-9,711-711[SIL];18-18,x-x[BULq];21-21,700-700[UP3]	.((-((((((((.((((((((&)))))))).)))))))).)).	AGG-GGCUCUGGUAUGUUCAG&UUGAACAUCCCAGAGCCACCG	0	0.0155185
miR9662-3p.Cluster_4660	miR9662-3p	Cluster_4660	UUGAACAUCCCAGAGCCACCG	miR9662	Dry	HORVU.MOREX.r3.6HG0543350.1:807	HORVU.MOREX.r3.6HG0543350.1	797	816	807	-41.6	-29.1	0.699519	4.5	1-8,816-809;10-17,807-800;19-20,799-798	9-9,808-808[SIL];18-18,x-x[BULq];21-21,797-797[UP3]	.((-((((((((.((((((((&)))))))).)))))))).)).	AGG-GGCUCUGGUAUGUUCAG&UUGAACAUCCCAGAGCCACCG	0	0.0141787
miR9662-3p.Cluster_4660	miR9662-3p	Cluster_4660	UUGAACAUCCCAGAGCCACCG	miR9662	Dry	HORVU.MOREX.r3.6HG0543460.1:695	HORVU.MOREX.r3.6HG0543460.1	683	704	695	-41.6	-34.8	0.836538	2.5	1-17,704-688;19-19,686-686;20-21,684-683	18-18,687-687[SIL];x-x,685-685[BULt]	((.(.(((((((((((((((((&))))))))))))))))).)-))	CGUGCGGCUCUGGGAUGUUCAG&UUGAACAUCCCAGAGCCAC-CG	0	0.000679775
miR9662-3p.Cluster_4660	miR9662-3p	Cluster_4660	UUGAACAUCCCAGAGCCACCG	miR9662	Day0	HORVU.MOREX.r3.6HG0541280.1:802	HORVU.MOREX.r3.6HG0541280.1	791	811	802	-41.6	-28.3	0.680288	7	3-8,809-804;10-19,802-793	1-2,811-810[UP5];9-9,803-803[SIL];20-21,792-791[UP3]	..((((((((((.((((((..&..)))))).))))))))))..	CCGUGGCUCUGGAAUGUUCCG&UUGAACAUCCCAGAGCCACCG	0	0.0345906
miR9662-3p.Cluster_4660	miR9662-3p	Cluster_4660	UUGAACAUCCCAGAGCCACCG	miR9662	Day0	HORVU.MOREX.r3.6HG0541690.1:780	HORVU.MOREX.r3.6HG0541690.1	769	789	780	-41.6	-32.5	0.78125	4.5	1-11,789-779;13-19,777-771	12-12,778-778[SIL];20-21,770-769[UP3]	..(((((((.(((((((((((&))))))))))).)))))))..	CCGUGGCUCCGGGAUGUUCAG&UUGAACAUCCCAGAGCCACCG	0	0.0020446
miR9662-3p.Cluster_4660	miR9662-3p	Cluster_4660	UUGAACAUCCCAGAGCCACCG	miR9662	Day0	HORVU.MOREX.r3.6HG0543460.1:695	HORVU.MOREX.r3.6HG0543460.1	683	704	695	-41.6	-34.8	0.836538	2.5	1-17,704-688;19-19,686-686;20-21,684-683	18-18,687-687[SIL];x-x,685-685[BULt]	((.(.(((((((((((((((((&))))))))))))))))).)-))	CGUGCGGCUCUGGGAUGUUCAG&UUGAACAUCCCAGAGCCAC-CG	0	0.000818341
miR9662-3p.Cluster_4660	miR9662-3p	Cluster_4660	UUGAACAUCCCAGAGCCACCG	miR9662	Day0	HORVU.MOREX.r3.7HG0710980.1:780	HORVU.MOREX.r3.7HG0710980.1	760	789	780	-41.6	-29.2	0.701923	10.5	1-14,789-776;15-16,767-766;17-20,764-761	x-x,775-768[BULt];x-x,765-765[BULt];21-21,760-760[UP3]	.((((.((........((((((((((((((&))))))))))))))--------))-)))).	AGGUGUGCCCCGUUACUCUGGGAUGUUCAG&UUGAACAUCCCAGA--------GC-CACCG	0	0.0158374
miR9662-3p.Cluster_4660	miR9662-3p	Cluster_4660	UUGAACAUCCCAGAGCCACCG	miR9662	Day1	HORVU.MOREX.r3.6HG0541280.1:802	HORVU.MOREX.r3.6HG0541280.1	791	811	802	-41.6	-28.3	0.680288	7	3-8,809-804;10-19,802-793	1-2,811-810[UP5];9-9,803-803[SIL];20-21,792-791[UP3]	..((((((((((.((((((..&..)))))).))))))))))..	CCGUGGCUCUGGAAUGUUCCG&UUGAACAUCCCAGAGCCACCG	0	0.0340168
miR9662-3p.Cluster_4660	miR9662-3p	Cluster_4660	UUGAACAUCCCAGAGCCACCG	miR9662	Day1	HORVU.MOREX.r3.6HG0543460.1:695	HORVU.MOREX.r3.6HG0543460.1	683	704	695	-41.6	-34.8	0.836538	2.5	1-17,704-688;19-19,686-686;20-21,684-683	18-18,687-687[SIL];x-x,685-685[BULt]	((.(.(((((((((((((((((&))))))))))))))))).)-))	CGUGCGGCUCUGGGAUGUUCAG&UUGAACAUCCCAGAGCCAC-CG	0	0.000813994
miR9662-3p.Cluster_4660	miR9662-3p	Cluster_4660	UUGAACAUCCCAGAGCCACCG	miR9662	Day1	HORVU.MOREX.r3.7HG0665830.1:862	HORVU.MOREX.r3.7HG0665830.1	851	871	862	-41.6	-30.1	0.723558	4.5	1-9,871-863;11-19,861-853	10-10,862-862[SIL];20-21,852-851[UP3]	..(((((((((.(((((((((&))))))))).)))))))))..	CCGUGGCUCUGCGAUGUUCAG&UUGAACAUCCCAGAGCCACCG	1	0.00485412
miR9662-3p.Cluster_4660	miR9662-3p	Cluster_4660	UUGAACAUCCCAGAGCCACCG	miR9662	Day1	HORVU.MOREX.r3.7HG0710980.1:780	HORVU.MOREX.r3.7HG0710980.1	760	789	780	-41.6	-29.2	0.701923	10.5	1-14,789-776;15-16,767-766;17-20,764-761	x-x,775-768[BULt];x-x,765-765[BULt];21-21,760-760[UP3]	.((((.((........((((((((((((((&))))))))))))))--------))-)))).	AGGUGUGCCCCGUUACUCUGGGAUGUUCAG&UUGAACAUCCCAGA--------GC-CACCG	0	0.0161546
miR9662-3p.Cluster_4660	miR9662-3p	Cluster_4660	UUGAACAUCCCAGAGCCACCG	miR9662	Day3	HORVU.MOREX.r3.6HG0541280.1:802	HORVU.MOREX.r3.6HG0541280.1	791	811	802	-41.6	-28.3	0.680288	7	3-8,809-804;10-19,802-793	1-2,811-810[UP5];9-9,803-803[SIL];20-21,792-791[UP3]	..((((((((((.((((((..&..)))))).))))))))))..	CCGUGGCUCUGGAAUGUUCCG&UUGAACAUCCCAGAGCCACCG	0	0.0327593
miR9662-3p.Cluster_4660	miR9662-3p	Cluster_4660	UUGAACAUCCCAGAGCCACCG	miR9662	Day3	HORVU.MOREX.r3.6HG0543320.1:710	HORVU.MOREX.r3.6HG0543320.1	700	719	710	-41.6	-29.1	0.699519	4.5	1-8,719-712;10-17,710-703;19-20,702-701	9-9,711-711[SIL];18-18,x-x[BULq];21-21,700-700[UP3]	.((-((((((((.((((((((&)))))))).)))))))).)).	AGG-GGCUCUGGUAUGUUCAG&UUGAACAUCCCAGAGCCACCG	0	0.0171079
miR9662-3p.Cluster_4660	miR9662-3p	Cluster_4660	UUGAACAUCCCAGAGCCACCG	miR9662	Day3	HORVU.MOREX.r3.6HG0543350.1:807	HORVU.MOREX.r3.6HG0543350.1	797	816	807	-41.6	-29.1	0.699519	4.5	1-8,816-809;10-17,807-800;19-20,799-798	9-9,808-808[SIL];18-18,x-x[BULq];21-21,797-797[UP3]	.((-((((((((.((((((((&)))))))).)))))))).)).	AGG-GGCUCUGGUAUGUUCAG&UUGAACAUCCCAGAGCCACCG	0	0.0167133
miR9662-3p.Cluster_4660	miR9662-3p	Cluster_4660	UUGAACAUCCCAGAGCCACCG	miR9662	Day3	HORVU.MOREX.r3.6HG0543370.1:698	HORVU.MOREX.r3.6HG0543370.1	688	707	698	-41.6	-29.1	0.699519	4.5	1-8,707-700;10-17,698-691;19-20,690-689	9-9,699-699[SIL];18-18,x-x[BULq];21-21,688-688[UP3]	.((-((((((((.((((((((&)))))))).)))))))).)).	AGG-GGCUCUGGUAUGUUCAG&UUGAACAUCCCAGAGCCACCG	0	0.0182904
miR9662-3p.Cluster_4660	miR9662-3p	Cluster_4660	UUGAACAUCCCAGAGCCACCG	miR9662	Day3	HORVU.MOREX.r3.6HG0543460.1:695	HORVU.MOREX.r3.6HG0543460.1	683	704	695	-41.6	-34.8	0.836538	2.5	1-17,704-688;19-19,686-686;20-21,684-683	18-18,687-687[SIL];x-x,685-685[BULt]	((.(.(((((((((((((((((&))))))))))))))))).)-))	CGUGCGGCUCUGGGAUGUUCAG&UUGAACAUCCCAGAGCCAC-CG	0	0.000802277
miR9662-3p.Cluster_4660	miR9662-3p	Cluster_4660	UUGAACAUCCCAGAGCCACCG	miR9662	Day3	HORVU.MOREX.r3.7HG0710980.1:780	HORVU.MOREX.r3.7HG0710980.1	760	789	780	-41.6	-29.2	0.701923	10.5	1-14,789-776;15-16,767-766;17-20,764-761	x-x,775-768[BULt];x-x,765-765[BULt];21-21,760-760[UP3]	.((((.((........((((((((((((((&))))))))))))))--------))-)))).	AGGUGUGCCCCGUUACUCUGGGAUGUUCAG&UUGAACAUCCCAGA--------GC-CACCG	0	0.0155289
miR9662-3p.Cluster_4660	miR9662-3p	Cluster_4660	UUGAACAUCCCAGAGCCACCG	miR9662	Day5	HORVU.MOREX.r3.6HG0541280.1:802	HORVU.MOREX.r3.6HG0541280.1	791	811	802	-41.6	-28.3	0.680288	7	3-8,809-804;10-19,802-793	1-2,811-810[UP5];9-9,803-803[SIL];20-21,792-791[UP3]	..((((((((((.((((((..&..)))))).))))))))))..	CCGUGGCUCUGGAAUGUUCCG&UUGAACAUCCCAGAGCCACCG	0	0.0339764
miR9662-3p.Cluster_4660	miR9662-3p	Cluster_4660	UUGAACAUCCCAGAGCCACCG	miR9662	Day5	HORVU.MOREX.r3.6HG0543320.1:710	HORVU.MOREX.r3.6HG0543320.1	700	719	710	-41.6	-29.1	0.699519	4.5	1-8,719-712;10-17,710-703;19-20,702-701	9-9,711-711[SIL];18-18,x-x[BULq];21-21,700-700[UP3]	.((-((((((((.((((((((&)))))))).)))))))).)).	AGG-GGCUCUGGUAUGUUCAG&UUGAACAUCCCAGAGCCACCG	0	0.0169351
miR9662-3p.Cluster_4660	miR9662-3p	Cluster_4660	UUGAACAUCCCAGAGCCACCG	miR9662	Day5	HORVU.MOREX.r3.6HG0543350.1:807	HORVU.MOREX.r3.6HG0543350.1	797	816	807	-41.6	-29.1	0.699519	4.5	1-8,816-809;10-17,807-800;19-20,799-798	9-9,808-808[SIL];18-18,x-x[BULq];21-21,797-797[UP3]	.((-((((((((.((((((((&)))))))).)))))))).)).	AGG-GGCUCUGGUAUGUUCAG&UUGAACAUCCCAGAGCCACCG	0	0.0177344
miR9662-3p.Cluster_4660	miR9662-3p	Cluster_4660	UUGAACAUCCCAGAGCCACCG	miR9662	Day5	HORVU.MOREX.r3.6HG0543460.1:695	HORVU.MOREX.r3.6HG0543460.1	683	704	695	-41.6	-34.8	0.836538	2.5	1-17,704-688;19-19,686-686;20-21,684-683	18-18,687-687[SIL];x-x,685-685[BULt]	((.(.(((((((((((((((((&))))))))))))))))).)-))	CGUGCGGCUCUGGGAUGUUCAG&UUGAACAUCCCAGAGCCAC-CG	0	0.000813012
miR9662-3p.Cluster_4660	miR9662-3p	Cluster_4660	UUGAACAUCCCAGAGCCACCG	miR9662	Day5	HORVU.MOREX.r3.7HG0665830.1:862	HORVU.MOREX.r3.7HG0665830.1	851	871	862	-41.6	-30.1	0.723558	4.5	1-9,871-863;11-19,861-853	10-10,862-862[SIL];20-21,852-851[UP3]	..(((((((((.(((((((((&))))))))).)))))))))..	CCGUGGCUCUGCGAUGUUCAG&UUGAACAUCCCAGAGCCACCG	1	0.00594423
miR9662-3p.Cluster_4660	miR9662-3p	Cluster_4660	UUGAACAUCCCAGAGCCACCG	miR9662	Day5	HORVU.MOREX.r3.7HG0710980.1:780	HORVU.MOREX.r3.7HG0710980.1	760	789	780	-41.6	-29.2	0.701923	10.5	1-14,789-776;15-16,767-766;17-20,764-761	x-x,775-768[BULt];x-x,765-765[BULt];21-21,760-760[UP3]	.((((.((........((((((((((((((&))))))))))))))--------))-)))).	AGGUGUGCCCCGUUACUCUGGGAUGUUCAG&UUGAACAUCCCAGA--------GC-CACCG	0	0.0161353
novel-3p.Cluster_3664	novel-3p	Cluster_3664	AUGGAGGUAGACGGAAACGGA	unknown	Day1	HORVU.MOREX.r3.2HG0184480.1:983	HORVU.MOREX.r3.2HG0184480.1	970	992	983	-39.6	-27.1	0.684343	6.5	2-13,991-980;14-19,977-972	1-1,992-992[UP5];x-x,979-978[BULt];20-21,971-970[UP3]	..((((((..((((((((((((.&.))))))))))))--))))))..	UAUGUUUCGGCGUCUGCCUCCAG&AUGGAGGUAGACG--GAAACGGA	1	0.0430424
novel-5p.Cluster_1777	novel-5p	Cluster_1777	UCCGUGGCGUUUCCGCUUAAC	unknown	Day5	HORVU.MOREX.r3.1HG0020310.1:334	HORVU.MOREX.r3.1HG0020310.1	323	343	334	-39.8	-30.4	0.763819	9.5	2-17,342-327	1-1,343-343[UP5];18-21,326-323[UP3]	....((((((((((((((((.&.))))))))))))))))....	GGGUGGCGGAGGCGCUGCGGG&UCCGUGGCGUUUCCGCUUAAC	0	0.0382882
novel-5p.Cluster_2558	novel-5p	Cluster_2558	UUAAAUUUCUCCAUAGCAUCA	unknown	Day0	HORVU.MOREX.r3.1HG0011450.1:1487	HORVU.MOREX.r3.1HG0011450.1	1476	1496	1487	-29.8	-25.6	0.85906	2	1-14,1496-1483;16-20,1481-1477	15-15,1482-1482[SIL];21-21,1476-1476[UP3]	.(((((.((((((((((((((&)))))))))))))).))))).	CGAUGCCAUGGAGAAAUUUAA&UUAAAUUUCUCCAUAGCAUCA	0	0.00286126
novel-5p.Cluster_2558	novel-5p	Cluster_2558	UUAAAUUUCUCCAUAGCAUCA	unknown	Day0	HORVU.MOREX.r3.1HG0011510.1:1202	HORVU.MOREX.r3.1HG0011510.1	1191	1211	1202	-29.8	-25.6	0.85906	2	1-14,1211-1198;16-20,1196-1192	15-15,1197-1197[SIL];21-21,1191-1191[UP3]	.(((((.((((((((((((((&)))))))))))))).))))).	CGAUGCCAUGGAGAAAUUUAA&UUAAAUUUCUCCAUAGCAUCA	0	0.00408501
novel-5p.Cluster_2558	novel-5p	Cluster_2558	UUAAAUUUCUCCAUAGCAUCA	unknown	Day0	HORVU.MOREX.r3.1HG0011560.1:1475	HORVU.MOREX.r3.1HG0011560.1	1464	1484	1475	-29.8	-25.6	0.85906	2	1-14,1484-1471;16-20,1469-1465	15-15,1470-1470[SIL];21-21,1464-1464[UP3]	.(((((.((((((((((((((&)))))))))))))).))))).	CGAUGCCAUGGAGAAAUUUAA&UUAAAUUUCUCCAUAGCAUCA	0	0.00163601
novel-5p.Cluster_2558	novel-5p	Cluster_2558	UUAAAUUUCUCCAUAGCAUCA	unknown	Day0	HORVU.MOREX.r3.1HG0011590.1:1487	HORVU.MOREX.r3.1HG0011590.1	1476	1496	1487	-29.8	-25.6	0.85906	2	1-14,1496-1483;16-20,1481-1477	15-15,1482-1482[SIL];21-21,1476-1476[UP3]	.(((((.((((((((((((((&)))))))))))))).))))).	CGAUGCCAUGGAGAAAUUUAA&UUAAAUUUCUCCAUAGCAUCA	0	0.00490001
novel-5p.Cluster_2558	novel-5p	Cluster_2558	UUAAAUUUCUCCAUAGCAUCA	unknown	Day0	HORVU.MOREX.r3.1HG0011700.1:846	HORVU.MOREX.r3.1HG0011700.1	835	855	846	-29.8	-25.6	0.85906	2	1-14,855-842;16-20,840-836	15-15,841-841[SIL];21-21,835-835[UP3]	.(((((.((((((((((((((&)))))))))))))).))))).	CGAUGCCAUGGAGAAAUUUAA&UUAAAUUUCUCCAUAGCAUCA	0	0.00245301
novel-5p.Cluster_2558	novel-5p	Cluster_2558	UUAAAUUUCUCCAUAGCAUCA	unknown	Day0	HORVU.MOREX.r3.1HG0011730.1:1037	HORVU.MOREX.r3.1HG0011730.1	1026	1046	1037	-29.8	-25.6	0.85906	2	1-14,1046-1033;16-20,1031-1027	15-15,1032-1032[SIL];21-21,1026-1026[UP3]	.(((((.((((((((((((((&)))))))))))))).))))).	CGAUGCCAUGGAGAAAUUUAA&UUAAAUUUCUCCAUAGCAUCA	0	0.00367726
novel-5p.Cluster_2558	novel-5p	Cluster_2558	UUAAAUUUCUCCAUAGCAUCA	unknown	Day0	HORVU.MOREX.r3.1HG0011760.1:1487	HORVU.MOREX.r3.1HG0011760.1	1476	1496	1487	-29.8	-25.6	0.85906	2	1-14,1496-1483;16-20,1481-1477	15-15,1482-1482[SIL];21-21,1476-1476[UP3]	.(((((.((((((((((((((&)))))))))))))).))))).	CGAUGCCAUGGAGAAAUUUAA&UUAAAUUUCUCCAUAGCAUCA	0	0.00326935
novel-5p.Cluster_2558	novel-5p	Cluster_2558	UUAAAUUUCUCCAUAGCAUCA	unknown	Day3	HORVU.MOREX.r3.1HG0011590.1:1487	HORVU.MOREX.r3.1HG0011590.1	1476	1496	1487	-29.8	-25.6	0.85906	2	1-14,1496-1483;16-20,1481-1477	15-15,1482-1482[SIL];21-21,1476-1476[UP3]	.(((((.((((((((((((((&)))))))))))))).))))).	CGAUGCCAUGGAGAAAUUUAA&UUAAAUUUCUCCAUAGCAUCA	1	0.0028051
novel-5p.Cluster_2558	novel-5p	Cluster_2558	UUAAAUUUCUCCAUAGCAUCA	unknown	Day3	HORVU.MOREX.r3.1HG0011700.1:846	HORVU.MOREX.r3.1HG0011700.1	835	855	846	-29.8	-25.6	0.85906	2	1-14,855-842;16-20,840-836	15-15,841-841[SIL];21-21,835-835[UP3]	.(((((.((((((((((((((&)))))))))))))).))))).	CGAUGCCAUGGAGAAAUUUAA&UUAAAUUUCUCCAUAGCAUCA	0	0.00480402
novel-5p.Cluster_68	novel-5p	Cluster_68	AAACGAUAUCACCGCCCUACA	unknown	Dry	HORVU.MOREX.r3.5HG0534390.1:1021	HORVU.MOREX.r3.5HG0534390.1	1010	1036	1021	-37.3	-26.1	0.699732	16	3-6,1034-1031;7-18,1024-1013;20-21,1011-1010	1-2,1036-1035[UP5];x-x,1030-1025[BULt];19-19,1012-1012[SIL]	((.((((((((((((......((((..&..))))------)))))))))))).))	UGGAGGGCGGUGAUACCAUUUUCGUGA&AAACGA------UAUCACCGCCCUACA	0	0.0288169
novel-5p.Cluster_68	novel-5p	Cluster_68	AAACGAUAUCACCGCCCUACA	unknown	Day0	HORVU.MOREX.r3.5HG0534390.1:1021	HORVU.MOREX.r3.5HG0534390.1	1010	1036	1021	-37.3	-26.1	0.699732	16	3-6,1034-1031;7-18,1024-1013;20-21,1011-1010	1-2,1036-1035[UP5];x-x,1030-1025[BULt];19-19,1012-1012[SIL]	((.((((((((((((......((((..&..))))------)))))))))))).))	UGGAGGGCGGUGAUACCAUUUUCGUGA&AAACGA------UAUCACCGCCCUACA	0	0.0349857

## Sheet: Table S4
geneID	dataType	Day0A	Day0B	Day0C	Day1A	Day1B	Day1C	Day2A	Day2B	Day2C	Day3A	Day3B	Day3C	Day4A	Day4B	Day4C	Day5A	Day5B	Day5C	DryA	DryB	DryC
HORVU.MOREX.r3.1HG0000030	TPM	0.22	0.22	0.54	1	0.56	1	2.5	2.8	2.92	3.13	3.37	5.53	3.12	6.05	5.41	5.07	5.32	1.55	1.85	3.59	1.58
HORVU.MOREX.r3.1HG0000040	TPM	93.96	114.12	105.41	98.71	99.65	117.03	91.09	91.99	94.07	102.4	96.04	92.97	115.05	112.29	109.74	128.22	115.33	97.21	172.56	158.66	171.48
HORVU.MOREX.r3.1HG0000050	TPM	28.1	25.8	27.62	27.99	24.13	27.36	28.84	26.08	26.2	30.6	31.79	32.45	35.94	40.62	36.51	37.57	40.07	36.09	24.5	28.15	23.99
HORVU.MOREX.r3.1HG0000060	TPM	20.69	14.04	16.61	20.11	16.73	15.29	17.05	14.17	16.79	13.01	13.38	15.57	16.46	17.39	18.5	14.14	14.08	15.87	10.32	12.47	14.51
HORVU.MOREX.r3.1HG0000070	TPM	273.55	252.1	249.39	295.96	333.21	362.11	343.63	374.47	346.62	325.87	306.49	312.3	320.81	347.31	326.53	327.76	281.35	276.27	390.94	449.82	396.49
HORVU.MOREX.r3.1HG0000080	TPM	15.05	12.55	12.65	32.88	22.49	25.08	20.45	21.09	20.68	19.59	18.37	19.16	18.47	18.27	18.57	14.66	15.14	18.25	3.6	12.87	8.83
HORVU.MOREX.r3.1HG0000090	TPM	19.82	17.47	17.01	19.19	19.84	16.65	24.3	22.62	22.61	17.38	19.62	19.51	18.66	19.93	18.78	18.01	16.51	17.89	6.38	6.84	11.56
HORVU.MOREX.r3.1HG0000110	TPM	84.04	108.84	107.51	60.74	54.35	55.93	31.64	29.42	33.01	40.6	26.33	37.45	33.99	41.72	35.61	32.15	38.15	40.51	18.75	23.73	29.97
HORVU.MOREX.r3.1HG0000130	TPM	150.19	145.3	159.77	132.06	102.95	106.88	93.3	87.59	102.13	89.16	79.28	101.12	86.94	96.74	96.46	76.24	87.22	122.79	27.51	39.78	42.14
HORVU.MOREX.r3.1HG0000140	TPM	21.46	19.16	18.87	16.58	18.29	16.76	14.43	13.64	13.94	15.12	15.28	14.85	14.13	15.13	14.61	12.92	14.43	14.95	7.34	11.75	12
HORVU.MOREX.r3.1HG0000210	TPM	0.78	0.29	0.33	1.41	0.85	1.53	0.82	0.68	0.78	0.61	0.2	0.66	0.43	0.58	0.41	0.69	0.41	0.39	0	0.02	0.02
HORVU.MOREX.r3.1HG0000220	TPM	1.13	0.88	1.05	1.61	1.14	1.29	1.31	1.16	1	1.55	1	1.42	1.44	1.72	1.46	1.71	1.88	1.59	0.08	0.11	0.08
HORVU.MOREX.r3.1HG0000230	TPM	0	0	0	0	0	0	0	0	0	0	0	0	0	0	0	0	0	0	0	0	0
HORVU.MOREX.r3.1HG0000240	TPM	0.04	0	0	0	0	0	0.04	0.15	0.16	0.1	0.14	0.27	0.11	0.27	0.08	0.07	0.09	0.19	0	0	0
HORVU.MOREX.r3.1HG0000250	TPM	0.12	0.12	0.2	0.25	0.19	0.25	0.13	0.11	0.16	0.14	0.25	0.31	0.28	0.38	0.22	0.21	0.33	0.21	0	0.04	0.04
HORVU.MOREX.r3.1HG0000260	TPM	0.08	0.41	0.08	1.84	0.36	0.34	68.6	43.87	29.19	105.22	240.12	140.66	634.03	370.7	339.59	696.54	701.56	423.06	0	0.36	0.18
HORVU.MOREX.r3.1HG0000270	TPM	0	0	0.11	3.33	0.48	0	0.85	2.84	6.94	2.05	1.9	0.1	3.67	1.78	5.85	0.63	1.89	1.1	0.33	0	0
HORVU.MOREX.r3.1HG0000280	TPM	0	0	0	0	0	0	0	0	0	0	0	0	0	0	0	0	0	0	0	0	0
HORVU.MOREX.r3.1HG0000290	TPM	0	0	0	0	0	0	0	0	0	0	0	0	0	0	0	0	0	0	0	0	0
HORVU.MOREX.r3.1HG0000340	TPM	0	0	0	0	0	0	0	0	0	0	0	0	0.03	0.05	0.02	0	0	0	0	0	0
HORVU.MOREX.r3.1HG0000350	TPM	112.64	130.78	125.59	66.23	82.2	70.94	63.42	67.1	68.47	70.57	74.5	67.94	70.91	77.94	76.61	87.54	79.36	57.52	162.33	138.4	163.62
HORVU.MOREX.r3.1HG0000360	TPM	0	0	0	0	0	0	0	0	0	0	0	0	0	0	0	0	0	0	0	0	0
HORVU.MOREX.r3.1HG0000370	TPM	0	0	0	0	0	0	0	0	0	0	0	0	0	0	0	0	0	0	0	0	0
HORVU.MOREX.r3.1HG0000380	TPM	305.15	122.36	172.98	150.28	135.78	117.23	284.31	270.39	169.19	240.3	358.71	396.44	261.78	230.37	290.67	269.01	193.4	292	66.96	165.54	109.81
HORVU.MOREX.r3.1HG0000390	TPM	470.64	117.38	250	313.79	246.01	237.69	597.32	574.92	341.15	520.12	663.7	873.57	607.77	503.76	642.49	668.21	408.32	805.11	118.39	336.44	164.01
HORVU.MOREX.r3.1HG0000400	TPM	0	0	0	0	0	0	0	0	0	0	0	0	0	0	0	0	0	0	0	0	0
HORVU.MOREX.r3.1HG0000410	TPM	114.46	38.38	61.01	46.3	45.55	32.6	110.18	82.83	58.88	84.16	122.8	161.06	136.03	133.48	168.69	134.18	100.95	146.82	11.11	60.89	28.65
HORVU.MOREX.r3.1HG0000420	TPM	14.46	20.28	31.86	22.3	29.59	11.44	44.04	34.22	86.25	65.42	18.96	18.85	70.64	56.38	132.93	18.19	31.34	3.9	35.29	9.17	0
HORVU.MOREX.r3.1HG0000430	TPM	0	0	0	0	0	0	0	0	0	0	0	0	0	0	0	0	0	0	0	0	0
HORVU.MOREX.r3.1HG0000440	TPM	0	0	0	0	0	0	0	0	0	0	0	0	0	0	0	0	0	0	0	0	0
HORVU.MOREX.r3.1HG0000450	TPM	74.62	32.28	30.86	11.76	18.59	15.22	66.78	66.05	44.16	66.9	72.69	98.84	87.8	81.92	93.92	94.98	67.91	72.37	3.57	9.99	2.91
HORVU.MOREX.r3.1HG0000460	TPM	225.5	70	127.05	174.34	133.24	105.9	340.94	294.24	211.66	291.25	317.78	417.67	397.31	314.34	408.99	335.06	224.66	388.06	73.63	137.77	144.87
HORVU.MOREX.r3.1HG0000470	TPM	82.52	34.79	48.84	48.88	51.29	40.83	109.01	106.15	73.86	94.1	119.08	162.8	107.12	105.43	148.02	104.43	68.22	100.23	10.85	25.57	19.85
HORVU.MOREX.r3.1HG0000480	TPM	70.98	30.66	72.47	83.11	96.35	28.38	110.14	99.59	133.59	164.05	121.06	89.71	161.52	101.23	282	47.1	46.66	134.1	168.83	33.85	101.69
HORVU.MOREX.r3.1HG0000490	TPM	0.75	1.07	0.28	4.36	1.99	2.77	14.99	13.54	15.6	14.06	22.17	20.43	24.73	21.51	24.76	23.63	19.53	17.32	0.25	0.31	0.13
HORVU.MOREX.r3.1HG0000520	TPM	0	0	0	0.03	0	0.04	0	0.04	0.02	0.02	0	0	0	0	0	0	0	0	0	0	0
HORVU.MOREX.r3.1HG0000530	TPM	0	0	0	0	0	0	0	0	0	0	0	0	0	0	0	0	0	0	0	0	0
HORVU.MOREX.r3.1HG0000540	TPM	0	0	0	0	0	0	0	0	0	0	0	0	0	0	0	0	0	0	0	0	0
HORVU.MOREX.r3.1HG0000580	TPM	0	0	0	0	0	0	0	0	0	0.06	0	0	0.06	0.05	0	0.05	0	0.09	0	0	0
HORVU.MOREX.r3.1HG0000590	TPM	2.16	2.11	3.15	1.84	3.32	3.51	1.8	0.6	2.6	2.08	1.21	1.91	4.55	3.46	1.78	3.73	4.81	3.49	7.53	9.63	6.64
HORVU.MOREX.r3.1HG0000600	TPM	0	0.11	0	0.04	0	0.02	0.07	0	0.05	0.19	0.07	0.02	0	0.17	0.05	0	0.22	1.33	0	0	0
HORVU.MOREX.r3.1HG0000610	TPM	57.44	57.12	54.62	50.57	53.09	49.39	40.25	33.09	38.95	40.89	32.98	36	41.23	41.86	35.35	41.78	40.76	49.99	29.03	26.2	44.38
HORVU.MOREX.r3.1HG0000620	TPM	136.14	110.84	129.12	118.49	98.54	99.38	107.82	101.13	125.72	110.13	112.54	109.33	109.83	115.28	123.6	91.69	109.7	114	27.23	51.55	47.74
HORVU.MOREX.r3.1HG0000630	TPM	131.8	68.91	91.14	89.46	86.24	73.44	58.64	57.6	58.33	45.26	43.13	51.39	41.14	41.44	44.85	39.65	39.66	48.12	8.87	22.38	10.87
HORVU.MOREX.r3.1HG0000660	TPM	29.44	31.61	30.16	30.26	33.15	25.96	21.5	20.49	22.35	25.24	26.1	25.53	30.02	30.63	27.65	29.44	30.34	31.36	5.54	8.35	7.75
HORVU.MOREX.r3.1HG0000670	TPM	91.41	65.76	81.1	62.12	61.01	55.19	51.43	52.88	59.88	53	56.76	50.86	43.3	46.33	51.45	48.45	48.19	37.24	49.17	58.21	81.14
HORVU.MOREX.r3.1HG0000680	TPM	1.5	1.17	0.98	0.83	2.31	3.58	0.83	0.84	0.9	0.33	0.34	0.44	0.54	0.39	0.58	0.16	0.13	0.21	0.83	0.27	0.76
HORVU.MOREX.r3.1HG0000690	TPM	1.34	0.77	0.56	0.55	0.1	0.09	1.41	3.19	2	6.14	2.46	7.53	4.76	9.44	4	2.71	8.64	8.71	0.2	0.23	0.15
HORVU.MOREX.r3.1HG0000710	TPM	0	0	0	0	0	0	0	0	0	0	0	0	0	0	0	0	0	0	0	0	0
HORVU.MOREX.r3.1HG0000720	TPM	0.08	0.11	0	0.14	0	0.03	0	0.07	0	0.13	0.06	0.1	0.17	0.03	0	0.06	0.24	0.11	0	0	0.04
HORVU.MOREX.r3.1HG0000730	TPM	0	1.05	0.77	0.42	0.36	0	0.58	0.57	1.35	0.62	0.13	0.3	1.05	0.89	1.66	0.14	0.96	1.45	0.31	0	0.61
HORVU.MOREX.r3.1HG0000780	TPM	56.96	39.48	20.62	10.12	15.5	10.21	8.47	12.35	11.41	6.39	5.89	3.18	3.09	1.86	3.35	3.25	2.11	2.16	27.94	111.39	68.38
HORVU.MOREX.r3.1HG0000800	TPM	67.3	49.06	36.43	16.55	23.86	12.28	22.05	16.91	19.85	12.55	11.35	6.4	9.77	8.34	10.75	6.28	4.47	3.41	63.86	90.29	80.69
HORVU.MOREX.r3.1HG0000810	TPM	28.1	21.42	12.58	6.18	10.12	7.84	6.75	8.93	7.19	4.47	4.31	3.32	3.39	2.23	4.49	2.22	1.33	1.07	26.44	49.87	28.61
HORVU.MOREX.r3.1HG0000850	TPM	79.04	68.23	70.36	169.28	120.15	115.23	274.97	262.25	268.15	256.62	336.84	325.32	310.81	284.43	321.21	314.75	276.8	296.33	54.52	79.95	67.98
HORVU.MOREX.r3.1HG0000870	TPM	0.04	0	0	0	0	0	0.03	0.03	0	0.03	0.03	0.03	0	0	0	0.03	0	0.1	0	0	0
HORVU.MOREX.r3.1HG0000880	TPM	4.71	2.98	2.23	43.41	46.06	65.12	51.25	51.89	49.44	40.14	32.86	37.05	50.02	50.51	42.33	38.29	40.71	30.07	0	1.09	1.52
HORVU.MOREX.r3.1HG0000950	TPM	2.83	4.91	1.65	29.73	36.76	34.86	3.35	2.92	5.15	1.59	1.12	1.64	1.43	0.89	1.57	0.42	0.28	0.31	0.01	0	0
HORVU.MOREX.r3.1HG0000990	TPM	3.78	4.15	3.64	3.07	2.26	2.65	1.76	1.58	1.49	1.56	1.51	2.38	1.44	1.91	1.35	1.72	1.45	1.69	0.23	0.53	1.02
HORVU.MOREX.r3.1HG0001010	TPM	0.83	1.01	0.94	0.53	0.68	0.63	0.39	0.31	0.32	0.32	0.42	0.48	0.34	0.32	0.21	0.35	0.3	0.45	0.01	0.26	0.28
HORVU.MOREX.r3.1HG0001020	TPM	0.1	0.2	0.14	0.02	0.1	0.11	0.01	0.02	0.04	0.01	0.02	0	0.01	0.01	0.04	0	0.01	0	0	0.09	0.02
HORVU.MOREX.r3.1HG0001030	TPM	0.18	0.12	0.18	0.13	0.14	0.24	0.14	0.09	0.11	0.06	0.07	0.12	0.12	0.13	0.05	0.11	0.12	0.13	0	0	0
HORVU.MOREX.r3.1HG0001050	TPM	0.39	0	0.25	0.53	0.11	1.2	0.75	0.97	2.2	0.63	1.4	0.68	1.35	1.23	1.37	0.72	0.86	0.18	0	0	0
HORVU.MOREX.r3.1HG0001070	TPM	1.32	23.24	6.18	3.42	3.15	0.86	4.62	6.92	10.82	2.08	0.22	1.1	4.4	4.02	5.23	1.15	0.76	2.07	26.95	4.54	3.95
HORVU.MOREX.r3.1HG0001100	TPM	490.88	337.27	218.51	69.23	119.21	80.3	80.15	90.81	76.18	46.34	47.24	28.18	19.78	23.08	26.57	23.63	17.58	15.79	265.35	1044.15	691.31
HORVU.MOREX.r3.1HG0001110	TPM	1060.18	688.88	478.98	202.86	324.55	225.07	169.58	210.77	147.31	133.95	136.08	86.51	70.58	60.99	83.58	81.05	44.22	58.3	801.91	2376.88	1269.61
HORVU.MOREX.r3.1HG0001120	TPM	45.36	40.24	38.54	63.67	70.87	74.09	77.94	82.02	76.73	73.45	60.82	64.56	61.14	63.65	65.43	54.03	54.2	36.91	52.25	56.25	53.79
HORVU.MOREX.r3.1HG0001130	TPM	88.24	73.61	77.51	76.2	72.67	63.31	76.11	70.98	65.34	70.94	75.76	75.67	64.85	63.05	59.47	78.78	67.22	67.86	40.46	62.72	51.99
HORVU.MOREX.r3.1HG0001140	TPM	10.89	2.38	5.17	11.71	10.59	13.03	24.86	23.58	14.85	20.3	30.15	26.5	21.7	21.04	19.77	30.33	21.3	15.13	0.93	7.22	2.96
HORVU.MOREX.r3.1HG0001150	TPM	3.06	0.57	0.95	2.08	1.53	5.49	4.21	4.45	2.34	4.71	4.47	4.71	5.04	5.4	4.8	6.98	5.81	3.08	0.33	1.67	0.28
HORVU.MOREX.r3.1HG0001180	TPM	0	0	0	0	0	0	0	0	0	0	0	0	0	0	0	0	0	0	0	0	0
HORVU.MOREX.r3.1HG0001190	TPM	0	0	0	0	0	0	0	0	0	0	0	0	0	0	0	0	0	0	0	0	0
HORVU.MOREX.r3.1HG0001210	TPM	0	0	0	0	0	0	0	0	0	0	0	0	0	0	0	0	0	0	0	0	0
HORVU.MOREX.r3.1HG0001220	TPM	296.1	204.46	154.97	44.07	66.11	41.19	26.82	41.15	51.4	22.59	29.65	19.56	10.9	14.57	14.85	13.53	11.03	11.66	239.14	1085.81	420.24
HORVU.MOREX.r3.1HG0001230	TPM	167.45	83.71	72.39	29.18	44.41	23.65	25.1	28.17	29.9	13.74	18.67	10.05	7.57	8.44	9.21	9.57	5.95	4.62	99.78	364.84	154.07
HORVU.MOREX.r3.1HG0001250	TPM	0	0	0	0	0	0	0	0	0	0	0	0	0	0	0	0	0	0	0	0	0
HORVU.MOREX.r3.1HG0001260	TPM	0	0	0	0	0	0	0	0	0	0	0	0	0	0	0	0	0	0	0	0	0
HORVU.MOREX.r3.1HG0001270	TPM	0	0	0	0	0	0	0	0	0	0	0	0	0	0	0	0	0	0	0	0	0
HORVU.MOREX.r3.1HG0001280	TPM	0	0	0	0	0	0	0	0.08	0.08	0.3	0	0.08	0.24	0.47	0.44	0	0.08	0.38	0.13	0	0
HORVU.MOREX.r3.1HG0001330	TPM	77.88	43.69	37.74	13.21	20.19	14.72	13.35	18.42	21.21	10.9	11.47	6.39	6.26	7.53	8.22	3.93	2.56	2.58	59.24	160.07	80.28
HORVU.MOREX.r3.1HG0001350	TPM	0.58	0.54	0.58	0.36	0	0	0	0.81	0	0	0.67	0	0.28	0	0.15	0	0.17	0.58	0.17	0	0.51
HORVU.MOREX.r3.1HG0001400	TPM	2.91	1.23	1.48	2.35	2.59	2.41	1.08	0.92	1.21	0.97	0.99	1.29	0.95	0.89	0.86	0.77	0.96	0.53	0.11	0.1	0.05
HORVU.MOREX.r3.1HG0001410	TPM	0.59	0.33	0.4	0.38	0.57	0.26	0.11	0.16	0.2	0.17	0.33	0.15	0	0.11	0.18	0.14	0.11	0.3	0.05	1.57	0.71
HORVU.MOREX.r3.1HG0001420	TPM	0.15	123.74	17.49	11.41	14.78	0	25.41	26.51	59.81	13.29	0.06	0	15.43	13.43	20.22	0	3.87	7.34	107.69	0.32	2.83
HORVU.MOREX.r3.1HG0001430	TPM	0	0	0	0	0	0	0	0	0	0	0	0	0	0	0	0	0	0	0	0	0
HORVU.MOREX.r3.1HG0001450	TPM	2.16	0	0.52	1.26	3.05	1.69	1.64	0.33	0.9	1.11	0	0.94	0.48	1.14	0.26	1.14	0.66	0	0	0.31	0.34
HORVU.MOREX.r3.1HG0001460	TPM	0.44	0.13	0.14	0.38	0.4	0.26	0.03	0.06	0	0.04	0	0	0.19	0.15	0.2	0	0	0	0.31	0.11	0.54
HORVU.MOREX.r3.1HG0001470	TPM	0.49	0.57	0.32	0.27	0.31	0.36	0.31	0.29	0.17	0.33	0.17	0.38	0.16	0.27	0.11	0.13	0.15	0.31	0.05	0.05	0.04
HORVU.MOREX.r3.1HG0001480	TPM	0	0	0	0	0.24	0	0	0	0	0	0	0	0	0	0	0	0	0	0	0	0
HORVU.MOREX.r3.1HG0001490	TPM	0	0	0	0	0	0	0	0	0	0	0	0	0	0	0	0	0	0	0	0	0
HORVU.MOREX.r3.1HG0001510	TPM	0.06	0.02	0.04	0.2	0.07	0.1	0.02	0.02	0.02	0.02	0.03	0.03	0.02	0.07	0.06	0	0.07	0.03	0	0	0
HORVU.MOREX.r3.1HG0001530	TPM	4.66	4.22	4.11	3.86	3.53	2.53	2.01	2.14	2.36	2.5	2.87	1.98	2.43	2.49	2.63	3.3	2.58	1.9	1.64	1.76	1.69
HORVU.MOREX.r3.1HG0001540	TPM	0.04	0	0	0.02	0	0	0.01	0	0	0.03	0.01	0	0	0	0	0	0	0	0.08	0.13	0
HORVU.MOREX.r3.1HG0001550	TPM	0	0	0	0	0	0	0	0	0	0	0	0	0	0	0	0	0	0	0	0	0
HORVU.MOREX.r3.1HG0001560	TPM	0	0	0	0	0	0	0	0	0	0	0	0	0	0	0	0	0	0	0	0	0
HORVU.MOREX.r3.1HG0001570	TPM	0	0	0	0	0	0	0	0	0	0	0	0	0	0	0	0	0	0	0	0	0
HORVU.MOREX.r3.1HG0001580	TPM	0	0	0	0	0	0	0	0	0	0	0	0	0	0	0	0	0	0	0	0	0
HORVU.MOREX.r3.1HG0001590	TPM	0	0	0	0	0	0	0	0	0	0	0	0	0	0	0	0	0	0	0	0	0
HORVU.MOREX.r3.1HG0001600	TPM	0	0	0	0	0	0	0	0	0	0	0	0	0	0	0	0	0	0	0	0	0
HORVU.MOREX.r3.1HG0001610	TPM	0	0	0	0	0	0	0	0	0	0	0	0	0	0	0	0	0	0	0	0	0
HORVU.MOREX.r3.1HG0001620	TPM	0	0	0	0	0	0	0	0	0	0	0	0	0	0	0	0	0	0	0	0	0
HORVU.MOREX.r3.1HG0001630	TPM	0	0	0	0	0	0	0	0	0	0	0	0	0	0	0	0	0	0	0	0	0
HORVU.MOREX.r3.1HG0001640	TPM	0.02	0.04	0.02	0.05	0	0.04	0.01	0	0	0	0	0	0	0	0	0	0	0	0.21	0.31	0.27
HORVU.MOREX.r3.1HG0001650	TPM	0.01	0	0.01	0.07	0.08	0.06	0.13	0.1	0.14	0.29	0.28	0.37	0.4	0.62	0.32	0.31	0.49	0.55	0	0	0.02
HORVU.MOREX.r3.1HG0001660	TPM	0.05	0.09	0.12	0.19	0.17	0.2	0.95	1.26	0.96	1.86	1.1	1.49	1.7	2.58	1.71	1.36	2.24	4.59	0.14	0	0.04
HORVU.MOREX.r3.1HG0001670	TPM	0.02	0.05	0.18	0.37	0.13	0.21	0.51	1.11	0.91	1.22	1.2	0.95	1.93	1.87	1.93	1.22	1.65	1.3	0.09	0.15	0
HORVU.MOREX.r3.1HG0001690	TPM	0	0	0	0.02	0	0	0.02	0.01	0.01	0.02	0.01	0.05	0.04	0.05	0.01	0	0.03	0.12	0	0	0
HORVU.MOREX.r3.1HG0001700	TPM	0.03	0.07	0.07	0.19	0.04	0.11	0.53	0.69	0.63	1.1	0.72	1.01	0	1.32	0.99	0.7	1.24	1.45	0.12	0.05	0.03
HORVU.MOREX.r3.1HG0001720	TPM	0	0	0	0.02	0	0	0.02	0.01	0.01	0.02	0.01	0.05	0.04	0.05	0.01	0	0.03	0.12	0	0	0
HORVU.MOREX.r3.1HG0001730	TPM	0.03	0.07	0.07	0.19	0.04	0.11	0.53	0.69	0.63	1.1	0.72	1.01	0	1.32	0.99	0.7	1.24	1.45	0.12	0.05	0.03
HORVU.MOREX.r3.1HG0001750	TPM	0.04	0	0	0.02	0	0	0.01	0	0	0.03	0.01	0	0	0	0	0	0	0	0.08	0.13	0
HORVU.MOREX.r3.1HG0001760	TPM	0	0	0	0	0	0	0	0	0	0	0	0	0	0	0	0	0	0	0	0	0
HORVU.MOREX.r3.1HG0001770	TPM	0	0	0	0	0	0	0	0	0	0	0	0	0	0	0	0	0	0	0	0	0
HORVU.MOREX.r3.1HG0001780	TPM	0	0	0	0	0	0	0	0	0	0	0	0	0	0	0	0	0	0	0	0	0
HORVU.MOREX.r3.1HG0001790	TPM	0.02	0.04	0.02	0.05	0	0.04	0.01	0	0	0	0	0	0	0	0	0	0	0	0.21	0.31	0.27
HORVU.MOREX.r3.1HG0001800	TPM	0.01	0	0.01	0.07	0.08	0.06	0.13	0.1	0.14	0.29	0.28	0.37	0.4	0.62	0.32	0.31	0.49	0.55	0	0	0.02
HORVU.MOREX.r3.1HG0001810	TPM	0.05	0.09	0.12	0.19	0.17	0.2	0.95	1.26	0.96	1.86	1.1	1.49	1.7	2.58	1.71	1.36	2.24	4.59	0.14	0	0.04
HORVU.MOREX.r3.1HG0001820	TPM	0.02	0.05	0.18	0.37	0.13	0.21	0.51	1.11	0.91	1.22	1.2	0.95	1.93	1.87	1.93	1.22	1.65	1.3	0.09	0.15	0
HORVU.MOREX.r3.1HG0001840	TPM	0	0	0	0.02	0	0	0.02	0.01	0.01	0.02	0.01	0.05	0.04	0.05	0.01	0	0.03	0.12	0	0	0
HORVU.MOREX.r3.1HG0001850	TPM	0.03	0.07	0.07	0.19	0.04	0.11	0.53	0.69	0.63	1.1	0.72	1.01	0	1.32	0.99	0.7	1.24	1.45	0.12	0.05	0.03
HORVU.MOREX.r3.1HG0001880	TPM	0	0	0	0.02	0	0	0.02	0.01	0.01	0.02	0.01	0.05	0.04	0.05	0.01	0	0.03	0.12	0	0	0
HORVU.MOREX.r3.1HG0001890	TPM	0.03	0.07	0.07	0.19	0.04	0.11	0.53	0.69	0	1.1	0.72	0	6.02	1.32	0.99	0.66	1.24	1.45	0.12	0.05	0.03
HORVU.MOREX.r3.1HG0001910	TPM	0	0	0.03	0	0.02	0	0	0	0	0	0	0	0	0	0	0	0	0	0	0	0
HORVU.MOREX.r3.1HG0001920	TPM	0	0	0	0	0	1.35	0.3	0.1	0.25	0.36	0	0	0	0	0	0	0	0	0	0	0
HORVU.MOREX.r3.1HG0001930	TPM	0	0	0	0	0	0	0	0	0	0	0	0	0	0	0	0	0	0	0	0	0
HORVU.MOREX.r3.1HG0001940	TPM	0	0	0	1.02	0.6	0	0	0	0	0	0.07	0.15	0.19	0.11	0.1	0	0	0	0	0	0
HORVU.MOREX.r3.1HG0001950	TPM	0	0	0	0	0	0	0	0	0	0	0	0	0	0	0	0	0	0	0	0	0
HORVU.MOREX.r3.1HG0001980	TPM	0.38	0	0.1	0.22	0.81	0.2	0.14	0.03	0.03	0.11	0	0	0.03	0	0.03	0	0	0.05	0	0	0.15
HORVU.MOREX.r3.1HG0001990	TPM	0.56	0	0	0.45	0.88	0.85	0.06	0.06	0.19	0.06	0	0.12	0.06	0.06	0	0	0	0.1	0	0	0
HORVU.MOREX.r3.1HG0002010	TPM	0.56	0	0	6.1	2.36	1.34	9.58	2.41	1.75	3.13	7.78	3.52	6.46	2.74	7.25	3.78	2.99	5.61	0	0	0
HORVU.MOREX.r3.1HG0002020	TPM	0.32	0	0	12.2	2.04	6.14	7.56	6.27	4.17	2.53	6.57	4.62	9.44	7.28	12.43	7.05	3.47	7.56	0	0	0
HORVU.MOREX.r3.1HG0002040	TPM	5.74	4.25	5.2	4.17	3.82	3.45	3.61	1.98	3.56	3.42	4.39	5.95	3.3	5.1	4.06	7.94	3.63	2.89	3.28	3.28	1.72
HORVU.MOREX.r3.1HG0002050	TPM	0	0	0	0	0	0	0	0	0	0	0	0	0	0	0	0	0	0	0	0	0
HORVU.MOREX.r3.1HG0002060	TPM	0.4	0.52	0.5	0.13	0.26	0.76	0.42	0.73	0.5	1	1	1.06	0.82	0.87	0.96	2.32	1.45	1.46	0.38	1.02	0.57
HORVU.MOREX.r3.1HG0002080	TPM	2.87	3.2	2.53	1.54	1.89	1.23	0.47	0.27	0.51	0.69	0.22	1.2	0.14	0.3	0.46	0.48	1.17	1.62	0.26	0.19	0.94
HORVU.MOREX.r3.1HG0002090	TPM	0	0	0	0	0	0	0	0	0	0	0	0.53	0	0	0	0.48	0.5	0	0	0	0.65
HORVU.MOREX.r3.1HG0002100	TPM	0	0	0	0	0	0	0.02	0	0	0	0	0	0.02	0	0	0	0	0	0	0	0
HORVU.MOREX.r3.1HG0002130	TPM	34.34	37.77	34.92	24.68	22.25	18.95	24.11	21.16	24.99	25.56	29.51	27.27	25.77	26.75	29.84	29.53	26.94	21.73	9.56	15.37	17.09
HORVU.MOREX.r3.1HG0002140	TPM	0	0	0	0	0	0	0	0	0	0	0	0	0	0	0	0	0	0	0	0	0
HORVU.MOREX.r3.1HG0002160	TPM	21.04	21.8	21.45	29.85	25.53	23.47	27.49	25.23	29.44	23.23	29.71	29.03	30.29	33.77	32.65	23.48	30.42	36.09	9.63	15.56	15.31
HORVU.MOREX.r3.1HG0002170	TPM	8.91	4.47	7.02	4.18	5.39	6.27	9.57	6.34	9.91	11.21	13.17	14.71	9.8	11.22	10.43	18.13	12.47	11.28	2.93	7.72	7.12
HORVU.MOREX.r3.1HG0002180	TPM	0.94	0.34	0.66	0.48	0.57	0.65	1.09	0.48	0.64	1.02	2.26	1.44	1.02	0.9	0.73	1.13	1.19	1.1	0.21	0.91	3.49
HORVU.MOREX.r3.1HG0002190	TPM	0	0	0	0	0	0	0	0	0	0	0	0	0	0	0	0	0	0	0	0	1.63
HORVU.MOREX.r3.1HG0002200	TPM	0	0	0	0	0	0	0	0	0	0	0	0	0	0	0	0	0	0	0	0	0
HORVU.MOREX.r3.1HG0002210	TPM	0	0	0	0	0	0	0	0	0	0	0	0	0	0	0	0	0	0	0	0	1.63
HORVU.MOREX.r3.1HG0002220	TPM	0	0	0	0	0	0	0	0	0	0	0	0	0	0	0	0	0	0	0	0	0
HORVU.MOREX.r3.1HG0002230	TPM	0	0	0	0	0	0	0	0	0	0	0	0	0	0	0	0	0	0	0	0	0
HORVU.MOREX.r3.1HG0002260	TPM	0	0	0	14.57	2.36	9.02	0.44	0.32	0.26	1.1	0.32	1.27	0.39	0.33	0.63	0.11	0.4	0.66	0	0	0
HORVU.MOREX.r3.1HG0002280	TPM	4.31	1.65	1.9	79.84	28.59	84.9	23.64	29.9	21.83	30.31	17.62	31.82	23.43	35.25	28.08	13.41	18.26	21.43	0.26	1.43	2.65
HORVU.MOREX.r3.1HG0002320	TPM	58.18	69.2	55.38	35.49	58.24	63.69	23.88	20.33	17.63	17.93	14.03	17.07	25.08	21.74	18.43	32.2	19.37	14.03	32.84	23.43	20.12
HORVU.MOREX.r3.1HG0002330	TPM	203.94	200.9	193.05	212.39	196.94	191.59	124.81	123.01	140.6	112.19	96.03	99.99	86.94	90.78	91.51	88.55	92.32	97.04	113.47	168.68	171.74
HORVU.MOREX.r3.1HG0002340	TPM	39.39	33.39	36.23	34.8	31.5	27.01	30.34	27.39	29.69	31.88	31.59	34.84	34.68	37.82	37.5	33.2	35.83	50.17	27.32	33.65	37.39
HORVU.MOREX.r3.1HG0002350	TPM	7.1	8.66	10.62	5.83	4.47	4.74	5.27	4.67	3.89	5.02	5.32	2.69	8.92	5.77	7.71	5.86	6.36	5.63	5.12	6.52	9.92
HORVU.MOREX.r3.1HG0002380	TPM	28.66	5.29	10.7	133.53	58.78	148.08	12.75	15.65	16.47	11.81	7.79	14.24	9.17	12.9	11.59	4.68	4.1	5.02	0.9	3.37	3.32
HORVU.MOREX.r3.1HG0002390	TPM	0	0	0	0	0	0	0	0	0	0	0	0	0	0	0	0	0	0	0	0	0
HORVU.MOREX.r3.1HG0002400	TPM	0	0	0	0	0	0	0	0	0	0	0	0	0	0	0	0	0	0	0	0	0
HORVU.MOREX.r3.1HG0002410	TPM	0	0	0	0	0	0	0.02	0	0	0.02	0.06	0.02	0.07	0.06	0.04	0	0	0.03	0	0	0
HORVU.MOREX.r3.1HG0002440	TPM	0	0	0	0	0	0	0	0	0	0	0	0	0.05	0	0	0	0	0	0	0	0
HORVU.MOREX.r3.1HG0002450	TPM	21.22	0.59	4.22	14.56	5.4	10.21	74.46	59.25	57.64	117.16	127.71	126.31	204.75	124.92	177.69	185.5	166.61	143.36	0.39	40.22	25
HORVU.MOREX.r3.1HG0002470	TPM	2.12	1.58	1.28	39.56	26.85	30.87	104.57	117.68	118.61	81.04	95.44	96.17	76.17	62.41	96.14	48.55	38.24	32.11	8.95	8	10.64
HORVU.MOREX.r3.1HG0002500	TPM	0	0	0	0.05	0.07	0.07	0.13	0.1	0.33	0.2	0.03	0.14	0.18	0.21	0.03	0.1	0.1	0.06	0	0	0
HORVU.MOREX.r3.1HG0002510	TPM	67.68	20.37	35.67	110.87	88.88	86.51	84.68	79.66	80.92	74.4	83.13	90.51	74.03	73.56	83.45	60.22	56.2	68.73	4.53	22.69	9.33
HORVU.MOREX.r3.1HG0002520	TPM	0	0	0	2.07	0.18	0.7	0	0	0.19	0	0	0.38	0.39	0	0.27	0.34	0.18	0.15	0.23	0	0
HORVU.MOREX.r3.1HG0002530	TPM	0.94	4.29	3.36	20.85	21.08	47.67	214.97	267.38	200.47	211.42	180.22	175.81	302.22	303.61	298.62	251.19	228.49	235.64	191.85	100.44	26.78
HORVU.MOREX.r3.1HG0002560	TPM	14.52	13.3	14.32	16.83	15.25	14.42	14.05	13.57	16.96	15.13	16.15	17.74	16.51	15.33	17.89	17.25	15.21	13.33	9.14	12.08	15.78
HORVU.MOREX.r3.1HG0002570	TPM	1.07	0.36	0.64	7.62	3.6	3.74	1.7	1.75	2.01	1.19	0.51	0.91	0.5	0.65	0.84	0.44	0.19	0.13	0.13	0	0.1
HORVU.MOREX.r3.1HG0002580	TPM	3.03	2.17	2.8	6.89	8.89	6.55	1.84	3.66	3.09	2.9	3.51	3.39	1.36	1.15	0.91	1.6	0.63	2.03	0.84	5.57	0.22
HORVU.MOREX.r3.1HG0002590	TPM	25.64	24.22	24.16	17.76	20.73	16.85	15.79	15.32	16.36	16.39	17.98	17.71	20.91	22.02	21.1	21.65	21.29	27.67	10.85	11.01	18.42
HORVU.MOREX.r3.1HG0002630	TPM	8.13	7.09	8.53	6.51	9.37	8.49	5.62	6.5	4.93	4.45	4.94	5.55	5.31	6.24	6.3	6.92	5.46	4.9	21.83	17.43	14.41
HORVU.MOREX.r3.1HG0002640	TPM	0	0	0	0	0	0	0	0	0	0	0	0	0	0	0	0	0	0	0	0	0
HORVU.MOREX.r3.1HG0002660	TPM	30.05	27.63	30.23	27.52	24.41	23.05	20.28	20.24	21.82	19.98	18.57	19.4	16.65	17.55	17.84	15.17	16.73	20.77	9.22	13.33	14.58
HORVU.MOREX.r3.1HG0002670	TPM	0.05	0.09	0	0.12	0.12	0.04	0	0	0	0	0	0.04	0.17	0.04	0	0.11	0.04	0	0.14	0.4	0.61
HORVU.MOREX.r3.1HG0002680	TPM	0	0	0	0	0	0	0	0	0	0	0	0	0	0	0	0	0	0	0	0	0
HORVU.MOREX.r3.1HG0002690	TPM	0	0	0	0	0	0	0	0	0	0	0	0	0	0	0	0	0	0	0	0	0
HORVU.MOREX.r3.1HG0002750	TPM	0	0	0	0	0	0	0	0	0	0	0	0	0	0	0	0	0	0	0	0	0
HORVU.MOREX.r3.1HG0002770	TPM	0	0	0	0	0	0	0	0	0	0	0	0	0	0	0	0	0	0	0	0	0
HORVU.MOREX.r3.1HG0002800	TPM	0.26	0.11	0.11	0.04	0.13	0.04	0	0	0.01	0.01	0	0	0	0	0	0.01	0	0	0	0	0.11
HORVU.MOREX.r3.1HG0002810	TPM	0	0	0	0.07	0	0	0	0.1	0.05	0.05	0.05	0.35	0	0	0.05	0	0	0.08	0	0	0
HORVU.MOREX.r3.1HG0002820	TPM	0	0	0	0	0	0	0	0	0	0	0	0	0	0	0	0	0	0	0	0	0
HORVU.MOREX.r3.1HG0002830	TPM	0.15	0.25	0.13	0.81	0.37	0.81	3.22	4.18	3.52	6.93	4.54	6.4	7.3	9.09	6.06	5.23	8.78	8.99	0.22	0.42	0.07
HORVU.MOREX.r3.1HG0002840	TPM	0.4	0.16	0.08	1.44	1.22	0.99	2.49	3.84	3.34	6.83	5.16	7.08	7.4	10.33	7.52	6.31	11.08	13.85	0.06	0.12	0
HORVU.MOREX.r3.1HG0002850	TPM	0.1	0.07	0.16	0	0	0	0	0	0	0	0	0	0	0	0	0	0	0	0.26	0.1	0
HORVU.MOREX.r3.1HG0002860	TPM	4.21	4.09	4.92	1.87	2.99	2.47	2.32	1.59	1.72	1.79	1.96	1.69	1.8	1.82	2.02	2.48	1.58	2.45	0.93	1.61	4.31
HORVU.MOREX.r3.1HG0002870	TPM	88.69	103.92	95.08	47.88	55.06	49.68	40.69	39.33	42.1	41.94	48.54	44.7	49.68	45.22	50.75	49.18	48.47	52.56	61.66	61.82	91.49
HORVU.MOREX.r3.1HG0002880	TPM	100.14	86.99	85.78	165.57	149.31	200.88	209.43	193.74	181.34	204.96	215.91	214.56	206.51	199.15	209.12	215.1	219.32	202.81	145.45	184.13	148.91
HORVU.MOREX.r3.1HG0002890	TPM	46.81	46.97	48.46	24.23	30.32	22.7	22.03	20.09	23.35	22.53	26	26.18	27.43	31.99	31.66	29.29	32.26	35.63	16.73	21.47	24.54
HORVU.MOREX.r3.1HG0002910	TPM	0	0	0	0.54	0.16	0.15	0.38	0.41	0.75	0.41	0.34	0.45	0.91	0.66	1.2	0.3	0.73	1.06	0	0	0
HORVU.MOREX.r3.1HG0002920	TPM	2.03	1.29	0.55	2.26	2.16	1.77	3.55	3.51	3.32	4.01	6.36	6.39	9.3	6.19	7	8.74	6	6.25	1.22	0.12	0.32
HORVU.MOREX.r3.1HG0002940	TPM	0	0	0.04	0.08	0.06	0	0.09	0.02	0.02	0	0.02	0	0	0.02	0.02	0	0	0	0	0	0
HORVU.MOREX.r3.1HG0002950	TPM	0	0	0.03	0	0.1	0.05	0	0	0	0	0	0	0	0.05	0.05	0	0.07	0	0	0	0
HORVU.MOREX.r3.1HG0002960	TPM	0.06	0.3	0.36	0	0.07	0.02	0	0.13	0.14	0.03	0.21	0.36	0.12	0.12	0.08	0.03	0.06	0.3	0	0.04	0.06
HORVU.MOREX.r3.1HG0002980	TPM	0	0	0	0	0	0	0	0	0	0	0	0	0	0	0	0	0	0	0	0	0
HORVU.MOREX.r3.1HG0002990	TPM	0.3	0.28	0.36	0.42	0.31	0.24	0.81	0.88	1.38	0.83	1.13	0.94	1.39	1.44	1.84	1.29	1.21	1.18	0.27	0.04	0
HORVU.MOREX.r3.1HG0003000	TPM	0	0	0.04	0.08	0.06	0	0.09	0.02	0.02	0	0.02	0	0	0.02	0.02	0	0	0	0	0	0
HORVU.MOREX.r3.1HG0003010	TPM	0	0	0.03	0	0.1	0.05	0	0	0	0	0	0	0	0.05	0.05	0	0.07	0	0	0	0
HORVU.MOREX.r3.1HG0003030	TPM	0	0.13	0.12	0	0	0.18	0	0	0	0	0	0.25	0	0.08	0	0.42	0	0.47	0	0	0.06
HORVU.MOREX.r3.1HG0003040	TPM	0.3	0.28	0.36	0.42	0.31	0.24	0.81	0.88	1.38	0.83	1.13	0.94	1.39	1.44	1.84	1.29	1.21	1.18	0.27	0.04	0
HORVU.MOREX.r3.1HG0003050	TPM	0	0	0	0	0	0	0	0	0	0	0	0	0	0	0	0	0	0	0	0	0
HORVU.MOREX.r3.1HG0003060	TPM	0	0	0	0.1	0	0	0	0	0	0	0	0	0	0	0	0	0	0	0	0	0
HORVU.MOREX.r3.1HG0003070	TPM	0	0	0	0	0	0	0	0	0	0	0	0	0	0	0.06	0	0	0	0	0	0
HORVU.MOREX.r3.1HG0003080	TPM	0	0	0	0	0	0	0	0	0	0	0	0	0	0	0	0	0	0	0	0	0
HORVU.MOREX.r3.1HG0003090	TPM	131.89	5.13	27.6	158.86	190.95	99.1	106.98	121.7	86.51	122.5	134.94	97.26	190.49	117.48	124.02	117.72	119.88	94.51	5.51	82.19	58.04
HORVU.MOREX.r3.1HG0003100	TPM	0	0	0	0	0	0	0	0	0	0	0	0	0	0	0	0	0	0	0	0	0
HORVU.MOREX.r3.1HG0003110	TPM	0	0	0	0.08	0	0	0	0.1	0	0	0	0	0.05	0.05	0	0	0	0	0	0	0
HORVU.MOREX.r3.1HG0003120	TPM	0	0	0	0	0	0.05	0	0	0	0	0	0	0	0	0	0	0	0	0	0	0
HORVU.MOREX.r3.1HG0003130	TPM	18.21	8.2	12.52	14.28	14.5	13.4	12.8	11.11	11.85	10.07	10.88	12	11.72	12.04	11.62	9.08	9.67	11.42	1.33	2.78	1.88
HORVU.MOREX.r3.1HG0003140	TPM	642.76	513.81	534.34	671.01	673.27	578.2	515.59	478.27	496.55	503.26	493.14	517.61	496.37	434.45	470.1	456.9	435.65	389.97	286.61	435.46	404.55
HORVU.MOREX.r3.1HG0003150	TPM	40.95	29.92	33.63	33.46	32.71	24.43	33.17	32.82	35.74	29.03	34.85	36.94	30.64	34.72	41.06	31.41	33.47	31.41	34.66	32.4	28.01
HORVU.MOREX.r3.1HG0003160	TPM	0.04	0	0.14	0.77	0.18	0.2	0.18	0.32	0.1	0.09	0.12	0.28	0.13	0.19	0.2	0.22	0.18	0.2	0	0	0.04
HORVU.MOREX.r3.1HG0003170	TPM	0	0	0	0	0	0	0	0.9	0	0	0	0	0	0	0	0	0	0	0	0	0
HORVU.MOREX.r3.1HG0003180	TPM	0.13	0.46	0.08	0.11	0.14	0.24	0.18	0.07	0.11	0.21	0.04	0	0.38	0.41	0.21	0.47	0.14	0.06	0	0	0
HORVU.MOREX.r3.1HG0003200	TPM	10.25	7.64	6.91	11.27	13.48	10.31	4.14	3.73	4.18	4.63	2.96	2.65	2.21	2.56	2.01	2.53	2.35	2.93	1.29	3.21	0.79
HORVU.MOREX.r3.1HG0003210	TPM	3.47	1.92	2.17	2.7	2.42	3.01	0.91	1.03	0.73	1.02	0.72	1.02	0.79	0.86	0.64	0.66	0.52	1.08	0.16	0.37	0.18
HORVU.MOREX.r3.1HG0003220	TPM	0.06	0	0	0	0	0.05	0	0	0	0	0	0	0	0	0	0.01	0	0	0.04	0	0.16
HORVU.MOREX.r3.1HG0003230	TPM	0.68	0.21	0.41	0.34	0.4	0.47	0.17	0.13	0.24	0.17	0.13	0.19	0.05	0.32	0.17	0.17	0.09	0.15	0	0.06	0
HORVU.MOREX.r3.1HG0003240	TPM	0	0	0	0	0	0	0	0	0	0	0	0	0	0	0	0	0	0	0	0	0
HORVU.MOREX.r3.1HG0003260	TPM	0.37	0.23	0.36	0.19	0.27	0.15	0.13	0.02	0.09	0.04	0.04	0.15	0.12	0.04	0.06	0.11	0.14	0.07	0.02	0.04	0.16
HORVU.MOREX.r3.1HG0003270	TPM	0	0	0	0	0	0	0	0	0	0	0	0	0	0	0	0	0	0	0	0	0
HORVU.MOREX.r3.1HG0003280	TPM	1.18	0.7	1.04	0.9	0.6	0.6	0.3	0.23	0.44	0.45	0.27	0.29	0.48	0.54	0.32	0.18	0.26	0.48	0.01	0.06	1.02
HORVU.MOREX.r3.1HG0003290	TPM	6.34	7.26	5.53	5.32	3.47	3.67	5.1	4.51	4.25	4.54	4.19	5.75	5.72	6.52	7.15	6.32	5.26	6.01	1.89	2.3	3.38
HORVU.MOREX.r3.1HG0003300	TPM	2.49	1.42	0.78	4.85	13.12	16.6	1.36	1.88	1.61	1.51	0.59	0.66	0.63	0.57	0.38	1.27	0.47	0.33	0.03	2.92	0.1
HORVU.MOREX.r3.1HG0003310	TPM	3.86	2.42	3.47	2.06	1.57	1.43	1.62	1.91	1.96	1.45	1.35	1.39	1.11	1.25	1.82	0.87	1.03	1.2	0.27	0.44	1.39
HORVU.MOREX.r3.1HG0003380	TPM	0	0	0	0	0	0	0	0	0	0	0	0	0	0	0	0	0	0	0	0	0
HORVU.MOREX.r3.1HG0003390	TPM	0.76	0.61	0.87	0.5	0.54	0.28	0.62	0.3	0.41	0.39	0.43	0.49	0.86	0.47	0.35	0.57	0.22	0.58	0	0	0.85
HORVU.MOREX.r3.1HG0003410	TPM	2.63	1.9	1.97	2.92	1.91	1.84	1.81	2.07	1.92	1.6	1.64	2.3	2.9	1.85	2	1.72	1.77	1.77	0.07	0.12	0.17
HORVU.MOREX.r3.1HG0003430	TPM	13.18	8.39	9.58	18.3	14.34	14.34	14.17	14.49	15.1	13.14	13.14	14.67	11.96	12.02	13.53	10.64	10.48	12.14	4.44	7.67	7.27
HORVU.MOREX.r3.1HG0003440	TPM	0.07	0.07	0.1	0.04	0.03	0.19	0	0.06	0.03	0.03	0.11	0.15	0	0.06	0.08	0.08	0.11	0	0.02	0.04	0
HORVU.MOREX.r3.1HG0003450	TPM	0	0	0	0	0	0	0	0	0	0	0	0	0	0	0	0	0	0	0	0	0
HORVU.MOREX.r3.1HG0003470	TPM	0	0	0	0	0	0	0	0	0	0	0	0	0	0	0	0	0	0	0	0	0
HORVU.MOREX.r3.1HG0003490	TPM	0	0	0	0	0	0	0	0	0	0	0	0	0	0	0	0	0	0	0	0	0
HORVU.MOREX.r3.1HG0003520	TPM	0	0	0	0	0	0	0	0	0	0	0	0	0	0	0	0	0	0	0	0	0
HORVU.MOREX.r3.1HG0003550	TPM	0	0	0	0	0	0	0	0	0	0	0	0	0	0	0	0	0	0	0	0	0
HORVU.MOREX.r3.1HG0003580	TPM	0	0	0	0	0	0	0	0	0	0	0	0	0	0	0	0	0	0	0	0	0
HORVU.MOREX.r3.1HG0003590	TPM	0	0	0	0	0	0	0	0	0	0	0	0	0	0	0	0	0	0	0	0	0
HORVU.MOREX.r3.1HG0003600	TPM	0	0	0	0	0	0	0	0	0	0	0	0	0	0	0	0	0	0	0	0	0
HORVU.MOREX.r3.1HG0003610	TPM	17.59	9.87	18.69	21.68	22.99	15.43	17.52	14.25	15.39	8.89	14.09	12.81	8.78	10.02	9.54	8.78	8.44	6.17	3.01	6.55	4.72
HORVU.MOREX.r3.1HG0003620	TPM	0.45	0.3	0.17	1.67	0.58	0.78	0.37	0.14	0.87	0.34	0.2	0.37	0.53	0.51	0.2	0.16	0.35	0.53	0.02	0.18	0
HORVU.MOREX.r3.1HG0003630	TPM	0	0	0	0	0	0	0	0	0	0	0	0	0	0	0	0	0	0	0	0	0
HORVU.MOREX.r3.1HG0003650	TPM	0	0.03	0	0.2	0.05	0.08	0.24	0	0.06	0.05	0.03	0	0	0.03	0	0.05	0	0	0.02	0	0
HORVU.MOREX.r3.1HG0003660	TPM	12.88	16.38	20.26	16.31	14.67	11.58	8.64	9.9	12.7	8.57	11.01	9.68	6.64	9.94	7.85	6.33	8.21	9.14	22.01	17.47	14.99
HORVU.MOREX.r3.1HG0003690	TPM	55.07	38.71	46.89	80.89	54.83	62.3	74.4	68.15	77.15	75.6	73.58	82.98	77.48	76.55	79.71	57.52	72.13	86.04	7.21	15.92	12.56
HORVU.MOREX.r3.1HG0003700	TPM	0.06	0.06	0.06	0.08	0.03	0.05	0	0.18	0.11	0.07	0.15	0.3	0.36	0.16	0.07	0.12	0.15	0.17	0	0.07	0
HORVU.MOREX.r3.1HG0003710	TPM	28.65	16.87	24.68	33.85	36.54	27.48	17.62	23.29	22.72	20.07	20.64	19.26	15.6	15.94	14.75	15.71	12.59	15.2	6.22	10.69	11.89
HORVU.MOREX.r3.1HG0003720	TPM	0.83	1.16	2.06	1.91	1.52	1.47	1.24	1.34	1.26	1.19	1.86	1.19	1.12	1.31	1.48	0.78	1.42	0.86	2.68	1.88	4.1
HORVU.MOREX.r3.1HG0003780	TPM	77.93	2.14	10.93	312.4	260.36	383.39	107.63	135.05	80.52	163.07	123.05	78.36	125.14	119.17	86.05	137.96	127.31	51.77	2.93	149.25	3.89
HORVU.MOREX.r3.1HG0003800	TPM	0	0	0	0	0	0	0	0	0	0	0	0	0	0	0	0	0	0	0	0	0
HORVU.MOREX.r3.1HG0003810	TPM	0	0	0	0	0	0	0	0	0	0	0	0	0	0	0	0	0	0	0	0	0
HORVU.MOREX.r3.1HG0003820	TPM	0.18	0	0	1.4	0.59	1.54	0.15	0.38	0.13	0.35	0.18	0.22	0.57	0.28	0.32	0.36	0.47	0.2	0.03	0.08	0
HORVU.MOREX.r3.1HG0003860	TPM	27.47	19.82	18.78	41.67	36.49	41.41	43.26	47.75	39.4	39.33	39.08	38.11	42.57	44.56	38.81	42.69	42.85	29.11	60.93	50.11	63.6
HORVU.MOREX.r3.1HG0003870	TPM	1.91	1.4	0.93	0.3	0.4	0.39	0.2	0.4	0.21	0.2	0	0.21	0.43	0.21	0.39	0.19	0.4	0	2.06	4.34	0.78
HORVU.MOREX.r3.1HG0003890	TPM	6.43	6.35	4.91	5.04	8.1	7.77	4.36	2.56	4.34	5.53	3.79	5.55	3.36	3.7	3.84	4.71	3.78	3.25	2.27	7.28	1.83
HORVU.MOREX.r3.1HG0003900	TPM	20.71	19.64	20.89	19.08	18.82	14.91	19.11	18.79	19.41	18.06	21.73	19.37	22.48	22.61	22.04	22.38	19.22	21.16	15.39	17.77	17.95
HORVU.MOREX.r3.1HG0003910	TPM	0	0	0	0	0	0	0	0	0	0	0	0	0	0	0	0	0	0	0	0	0
HORVU.MOREX.r3.1HG0003920	TPM	0	0	0	0	0	0	0	0	0	0	0	0	0	0	0	0	0	0	0	0	0
HORVU.MOREX.r3.1HG0003950	TPM	31.53	25.65	23.75	33.89	25.93	28.34	29.1	28.87	28.82	33.08	28.97	33.74	28.48	30.85	29.79	27.13	31.82	36.51	9.53	12.64	17.32
HORVU.MOREX.r3.1HG0003970	TPM	0	0	0	0	0	0	0	0	0	0.29	0	0	0	0	0	0	0	0	0	0	0
HORVU.MOREX.r3.1HG0003980	TPM	0	0	0	0	0	0	0	0	0	0	0	0	0	0	0	0	0	0	0	0	0
HORVU.MOREX.r3.1HG0003990	TPM	0.09	0.46	0.46	0	0.24	0.15	0	0	0.17	0.08	0	0	0	0	0.16	0.08	0.08	0	0.07	0	0
HORVU.MOREX.r3.1HG0004000	TPM	0.06	0.06	0.24	0	0.1	0	0	0.1	0	0	0.1	0.11	0.11	0	0.05	0	0.1	0.09	0	0	0
HORVU.MOREX.r3.1HG0004020	TPM	0	0	0	0	0	0	0	0	0	0	0	0	0	0	0	0	0	0	0	0	0
HORVU.MOREX.r3.1HG0004030	TPM	0.06	0	0	0	0	0	0.1	0.05	0	0	0	0	0.05	0	0	0	0.05	0	0	0	0
HORVU.MOREX.r3.1HG0004060	TPM	0	0.08	0	0	0	0	0.13	0	0	0	0.06	0	0	0	0.06	0	0	0	0	0	0
HORVU.MOREX.r3.1HG0004110	TPM	4.95	6.81	4.25	0.37	2.2	8.28	0.48	0.24	0	0.72	0	0.26	0.53	0.25	0	1.39	0	0	1.47	0.62	0
HORVU.MOREX.r3.1HG0004130	TPM	0.04	0.08	0.12	0.1	0	0.06	0	0	0	0	0	0	0	0	0	0	0	0.05	0	0	0.09
HORVU.MOREX.r3.1HG0004150	TPM	29.28	26.48	26.92	30.76	31.99	25.85	32.38	28.27	33.63	32.13	33.81	32.36	28.12	30.43	29.85	21.68	24.76	32.11	5.94	10.08	10.01
HORVU.MOREX.r3.1HG0004160	TPM	12.56	13.68	12.77	6.38	6.77	6.26	6.41	5.7	6.94	6.92	8.53	6.41	7.64	8.21	8.44	7.76	8.28	9.06	6.41	7.87	9.84
HORVU.MOREX.r3.1HG0004210	TPM	38.81	33.89	35.92	32.72	35.38	28.41	35.44	35.03	34.62	38.97	39.82	36.94	32.79	38.61	35.5	37.59	37.97	33.81	81.76	62.58	91.11
HORVU.MOREX.r3.1HG0004220	TPM	8.92	4.73	4.07	38.5	34.87	51.26	38.99	47.96	36.47	31.33	28.4	33.34	22.32	24.67	20.67	17.46	16.39	13.62	0.71	4.14	3.7
HORVU.MOREX.r3.1HG0004230	TPM	2.46	3.06	2.88	1.41	1.29	1.19	0.93	1.02	1.26	1.09	1.96	1.87	1.52	2.03	1.35	1.08	1.82	1.98	1.15	1.4	1.94
HORVU.MOREX.r3.1HG0004240	TPM	7.56	5.49	7.99	4.23	6.1	4.72	5.04	4.85	4.97	4.74	5.69	5.45	2.93	4.17	4	3.05	3.74	6.15	14.39	6.92	4.99
HORVU.MOREX.r3.1HG0004250	TPM	0	0	0	0	0	0	0	0	0	0	0	0	0	0	0	0	0	0	0	0	0
HORVU.MOREX.r3.1HG0004260	TPM	0	0	0	0	0	0	0	0	0	0	0	0	0	0	0	0	0	0	0	0	0
HORVU.MOREX.r3.1HG0004270	TPM	0	0	0	0	0	0	0	0	0	0	0	0	0	0	0	0	0	0	0	0	0
HORVU.MOREX.r3.1HG0004280	TPM	15.86	1.59	6.5	46.68	21.11	35.01	53.2	55.66	36.82	85.26	89.35	52.83	102.26	68.31	75.35	102.5	59.12	65.22	1.36	52.57	32
HORVU.MOREX.r3.1HG0004290	TPM	870.57	348.58	520.12	2259.73	1630.71	2200.82	5031.53	5035.77	3357.53	5599.84	5769.37	6223.69	5837.64	3891.89	5074.48	5391.41	4017.59	4637.79	331.31	2135.98	1428.59
HORVU.MOREX.r3.1HG0004300	TPM	0.02	0.02	0.03	0.03	0.06	0.03	0.02	0.02	0.02	0.02	0	0	0.02	0	0.02	0.03	0	0	0	0.07	0.14
HORVU.MOREX.r3.1HG0004310	TPM	0	0	0	0	0	0.41	0	0	0	0	0	0	0	0	0	0	0	0	0	0	59.91
HORVU.MOREX.r3.1HG0004320	TPM	0.27	0.78	0.4	0	0.99	0	0	0.32	0	0	0	0	0	0	0	0	0	0	0.86	0.42	10.33
HORVU.MOREX.r3.1HG0004340	TPM	0.98	0.62	0.82	0.81	0.6	0.8	0.96	0.6	0.72	0.77	0.34	0.63	0.73	1.32	0.99	0.65	1.01	1.03	0	0	0.09
HORVU.MOREX.r3.1HG0004350	TPM	0.14	0.11	0.13	0.16	0.34	0.13	0	0.09	0	0.09	0	0.1	0.3	0	0.53	0.18	0.09	0	0	0	0.12
HORVU.MOREX.r3.1HG0004370	TPM	0.05	0.03	0.03	0.07	0.05	0.01	0.05	0.07	0.04	0.01	0.02	0.06	0.02	0.03	0.03	0.03	0.03	0.04	0.01	0.01	0.08
HORVU.MOREX.r3.1HG0004380	TPM	0	0	0	0	0	0	0	0	0	0	0	0	0	0	0	0	0	0	0	0	0
HORVU.MOREX.r3.1HG0004410	TPM	0.01	0.03	0	0.02	0.01	0	0.01	0.02	0.01	0.01	0.01	0.01	0.04	0.01	0	0.01	0	0.02	0.01	0.05	0.14
HORVU.MOREX.r3.1HG0004440	TPM	0	0	0.02	0	0	0	0	0	0.01	0	0	0	0	0	0	0	0.07	0	0	0	0
HORVU.MOREX.r3.1HG0004450	TPM	0.05	0.03	0.03	0.07	0.05	0.01	0.05	0.07	0.04	0.01	0.02	0.06	0.02	0.03	0.03	0.03	0.03	0.04	0.01	0.01	0.08
HORVU.MOREX.r3.1HG0004460	TPM	0	0	0	0	0	0	0	0	0	0	0	0	0	0	0	0	0	0	0	0	0
HORVU.MOREX.r3.1HG0004490	TPM	0.01	0.03	0	0.02	0.01	0	0.01	0.02	0.01	0.01	0.01	0.01	0.04	0.01	0	0.01	0	0.02	0.01	0.05	0.14
HORVU.MOREX.r3.1HG0004520	TPM	0	0	0.02	0	0	0	0	0	0.01	0	0	0	0	0	0	0	0.07	0	0	0	0
HORVU.MOREX.r3.1HG0004540	TPM	78.14	69.51	79.79	65.89	71.07	53.95	52.76	52.99	48.41	48.83	50.95	58.1	46.03	47.4	47.4	35.19	47.31	55.35	12.26	27.34	20.08
HORVU.MOREX.r3.1HG0004550	TPM	0	0	0	0	0	0.25	0	0	0	0	0	0	0	0	0	0	0	0	0	0	0
HORVU.MOREX.r3.1HG0004560	TPM	52.79	70.16	59.75	44.99	29.79	31.67	31.73	28.63	28.15	50.75	45.8	48.37	31.93	27.86	20.91	34.56	47.7	48.07	33.31	65.3	48.73
HORVU.MOREX.r3.1HG0004600	TPM	0	0	0	0	0	0	0	0	0	0	0	0	0	0	0	0	0	0	0	0	0
HORVU.MOREX.r3.1HG0004610	TPM	0	0	0	0	0	0	0	0	0	0	0	0	0	0	0	0	0	0	0	0	0
HORVU.MOREX.r3.1HG0004640	TPM	0	0	0	0	0	0	0	0	0	0	0	0	0	0	0	0	0	0	0	0	0
HORVU.MOREX.r3.1HG0004650	TPM	0	0	0	0	0	0	0	0	0	0	0	0	0	0	0	0	0	0	0	0	0
HORVU.MOREX.r3.1HG0004660	TPM	13.45	9.91	12	40.16	24.34	31.87	83.62	82.63	75.54	56.05	69.54	77.45	50.01	45.5	56.23	49.46	41.34	51.4	4.26	8.12	8.53
HORVU.MOREX.r3.1HG0004670	TPM	0	0	0	0	0	0	0	0.02	0	0	0	0	0	0	0	0	0.02	0.84	0	0	0
HORVU.MOREX.r3.1HG0004690	TPM	0	0	0	0	0	0	0	0	0	0	0	0	0	0	0	0.32	0	0	0	0	0
HORVU.MOREX.r3.1HG0004700	TPM	0	0	0	0	0	0	0	0	0	0	0	0	0	0	0	0	0	0	0	0	0
HORVU.MOREX.r3.1HG0004730	TPM	14.79	19.51	16.82	11.57	19.7	26.61	12.8	7.07	5.11	5.11	3.28	3.93	15.2	10.86	10.37	8.61	14.98	9.69	2.82	2.93	4.25
HORVU.MOREX.r3.1HG0004780	TPM	0	0	0	0	0	0	0	0	0	0	0	0	0	0	0	0	0	0	0	0	0
HORVU.MOREX.r3.1HG0004840	TPM	0	0	0	0	0	0	0	0	0	0	0	0	0	0	0	0	0	0	0	0	0
HORVU.MOREX.r3.1HG0004870	TPM	56.66	38.44	51.09	53.35	61.23	43.32	37.65	37.15	38.71	30.13	35.76	38.8	33.98	35.41	37.22	32.98	33.78	35.26	13.64	21.46	18.11
HORVU.MOREX.r3.1HG0004880	TPM	56.2	44.49	46.79	51.66	53.38	51.39	50.16	45.39	47.4	51.4	51.45	47.07	50.07	51.9	49.54	44.35	46.54	49.21	49.5	64.41	70.52
HORVU.MOREX.r3.1HG0004890	TPM	11.02	9.96	12.41	15.41	14.19	12.38	12.97	11.87	15.89	11.36	12.72	12.54	13.51	12.59	15.97	12.26	11.78	11.66	8.46	10.42	11.05
HORVU.MOREX.r3.1HG0004910	TPM	0	0	0	0	0	0	0	0	0	0	0	0	0	0	0	0	0	0	0	0	0
HORVU.MOREX.r3.1HG0004940	TPM	16.36	18.5	17.98	48.81	47.36	57.82	719.49	718.63	522.86	793.97	871.31	907.57	1295.62	1268.42	1319.28	1859.89	1390.26	1230.88	41.51	426.34	456.18
HORVU.MOREX.r3.1HG0004990	TPM	0	0	0	0	0	0	0	0	0	0	0	0	0	0	0	0	0	0	0	0	0
HORVU.MOREX.r3.1HG0005000	TPM	0	0	0	0.13	0	0	0.08	0.24	0.4	0.24	0.13	0.13	0.12	0.54	0.48	0.11	0.19	0.13	0	0	0
HORVU.MOREX.r3.1HG0005040	TPM	21.05	23.23	24.01	14.04	14.6	16.37	16.77	14.93	15.13	20.4	15.42	15.62	19.9	19.51	18.38	22.37	23.71	17.4	14.58	20.18	17.09
HORVU.MOREX.r3.1HG0005060	TPM	0	0	0	0	0	0	0	0	0	0	0	0	0	0	0	0	0	0	0	0	0
HORVU.MOREX.r3.1HG0005070	TPM	0	0.15	0.33	0	0.13	0	0	0	0	0	0	0	0	0.13	0	0	0	0	0	0.58	0
HORVU.MOREX.r3.1HG0005090	TPM	0	0	0	0	0	0	0.72	0.49	0.14	0.31	0.31	0.11	0.39	0.27	0.69	0.2	0.16	0.22	0	0	0
HORVU.MOREX.r3.1HG0005110	TPM	0.23	0.3	0.25	0.3	0.46	0.25	0.3	0.22	0.21	0.06	0.17	0.28	0.12	0.23	0.23	0.14	0.11	0.14	0	0.11	0.03
HORVU.MOREX.r3.1HG0005130	TPM	0	0	0	0.27	0	0.17	0.35	0	0	0	0	0	0	0	0.17	0	0.18	0	0	0	0
HORVU.MOREX.r3.1HG0005170	TPM	0	0	0	0	0	0	0	0	0	0	0	0	0	0	0	0	0	0	0	0	0
HORVU.MOREX.r3.1HG0005190	TPM	0	0	0	0	0	0	0	0	0	0	0	0	0	0	0	0	0	0	0	0	0
HORVU.MOREX.r3.1HG0005200	TPM	0	0	0	0	0	0	0	0	0	0	0	0	0	0	0	0	0	0	0	0	0
HORVU.MOREX.r3.1HG0005210	TPM	0	0	0	0	0	0	0	0	0	0	0	0	0	0	0	0	0	0	0	0	0
HORVU.MOREX.r3.1HG0005220	TPM	0	0	0	0	0	0	0	0	0	0	0	0	0	0	0	0	0	0	0	0	0
HORVU.MOREX.r3.1HG0005230	TPM	0	0	0	0	0	0	0	0	0	0	0	0	0	0	0	0	0	0	0	0	0
HORVU.MOREX.r3.1HG0005240	TPM	0	0	0	0	0	0	0	0	0	0	0	0	0	0	0	0	0	0	0	0	0
HORVU.MOREX.r3.1HG0005250	TPM	0	0	0	0	0	0	0	0	0	0	0	0	0	0	0	0	0	0	0	0	0
HORVU.MOREX.r3.1HG0005260	TPM	0	0	0	0	0	0	0	0	0	0	0	0	0	0	0	0	0	0	0	0	0
HORVU.MOREX.r3.1HG0005270	TPM	0	0	0	0	0	0	0	0	0	0	0	0	0	0	0	0	0	0	0	0	0
HORVU.MOREX.r3.1HG0005340	TPM	0	0	0	0	0	0	0	0	0	0	0	0	0	0	0	0	0	0	0	0	0
HORVU.MOREX.r3.1HG0005350	TPM	0	0	0	0	0	0	0	0	0	0	0	0	0	0	0	0	0	0	0	0	0
HORVU.MOREX.r3.1HG0005360	TPM	0.16	0.15	0.12	0.15	0.07	0.1	0.1	0.07	0.14	0.13	0.03	0.14	0.04	0.14	0.13	0.06	0.1	0.11	0.28	0	0.21
HORVU.MOREX.r3.1HG0005370	TPM	23.43	22.39	21.7	14.11	14.4	12.87	9.25	7.99	8.59	8.98	8.96	10.39	8.55	8.39	8.93	8.97	9.06	8.14	1.99	3.11	3.63
HORVU.MOREX.r3.1HG0005380	TPM	0	0	0	0	0	0	0	0	0	0	0	0.09	0	0	0	0	0	0	0	0	0
HORVU.MOREX.r3.1HG0005390	TPM	0	0	0	0	0	0	0	0	0	0	0	0	0	0	0	0	0.06	0	0	0	0
HORVU.MOREX.r3.1HG0005400	TPM	30.88	28.13	28.2	34.9	27.33	29.51	35.99	34.75	34.43	40.97	39.41	38.96	37.95	36.47	33.82	42.55	41.05	42.37	40.52	37.35	47.71
HORVU.MOREX.r3.1HG0005410	TPM	68.8	84.42	83.67	42.93	44.98	44.38	60.69	59.27	54.37	67.5	75.88	76.08	84.44	94.42	83.7	112.06	98.31	74.6	110.83	125.75	122.66
HORVU.MOREX.r3.1HG0005420	TPM	1.11	4.01	1.76	3.11	2.28	6.35	4.24	2.93	1.22	2.43	1.4	1.81	6.45	5.86	3.34	3.57	5.89	5.13	0.13	0.3	0.45
HORVU.MOREX.r3.1HG0005430	TPM	0	0	0	0	0	0	0	0	0	0	0	0	0	0.09	0	0	0	0	0	0	0
HORVU.MOREX.r3.1HG0005440	TPM	0	0	0	0	0	0	0	0	0	0	0	0	0	0	0	0	0	0	0	0	0
HORVU.MOREX.r3.1HG0005450	TPM	0	0	0	0	0	0	0	0	0	0	0	0	0	0	0	0	0	0	0	0	0
HORVU.MOREX.r3.1HG0005480	TPM	8.8	7.78	10.4	14.08	16.04	16.94	15.96	15.47	12.47	10.91	11.89	11.41	11.09	12.81	11.84	8.77	9.79	8.63	10.32	15.7	6.37
HORVU.MOREX.r3.1HG0005490	TPM	0	0	0	0	0	0	0	0	0	0	0	0	0	0	0	0	0	0	0	0	0
HORVU.MOREX.r3.1HG0005580	TPM	10.55	11.74	6.4	16.19	9.94	14.05	87.01	79.12	83.78	96.42	124.22	107.93	154.08	119.67	135.99	162.9	123.14	106.77	30.31	27.37	12.97
HORVU.MOREX.r3.1HG0005590	TPM	30.58	34.24	34.18	56.06	67.01	81.44	114.28	111.94	102.3	119.73	144.62	139.99	160.42	142.94	157.19	174.49	133.76	117.1	46.04	42.42	47.6
HORVU.MOREX.r3.1HG0005600	TPM	518.84	510.24	427.26	1403.96	1547.4	1907.25	2861.99	2825.26	2318.86	3204.76	3576.96	3154.9	4444.76	4490.5	4553.59	5524.01	4279.6	4360.1	1483.25	1795.57	1308.05
HORVU.MOREX.r3.1HG0005610	TPM	0.42	0	0.34	0.18	0.32	0.51	0	0	0.06	0.2	0	0.06	0.06	0.03	0.03	0.06	0.03	0.1	0.05	0.15	0
HORVU.MOREX.r3.1HG0005620	TPM	5.6	4.17	5.33	8.68	7.21	6.93	8.61	6.78	9.54	8.16	8.8	8.57	7.58	7.73	8.06	6.32	6.85	8.86	3.24	4.12	5.34
HORVU.MOREX.r3.1HG0005640	TPM	0.02	0.12	0	0.25	0.21	0.12	0.41	0.41	0.11	0.66	0.66	0.91	0.64	0.73	0.54	0.58	1.04	1.33	0	0	0.13
HORVU.MOREX.r3.1HG0005660	TPM	0	0	0	0	0	0	0	0	0	0	0	0	0	0	0	0	0	0	0	0	0
HORVU.MOREX.r3.1HG0005680	TPM	0	0	0	0	0	0	0	0	0	0	0	0	0	0	0	0	0	0	0	0	0
HORVU.MOREX.r3.1HG0005700	TPM	0	0	0	0	0	0	0	0.08	0	0	0	0	0	0	0	0	0	0	0	0	0
HORVU.MOREX.r3.1HG0005720	TPM	0.63	3.54	1.71	0.64	0.11	0.51	0	0	0	0	0	0	0.11	0	0	0.3	0.31	0.17	0	0	0
HORVU.MOREX.r3.1HG0005730	TPM	1.29	4.06	0.28	3.11	0.72	2.68	0.48	0.12	0.13	0	0.6	0	1.03	0.38	0.24	0.91	2.03	2.39	0	0.31	0
HORVU.MOREX.r3.1HG0005750	TPM	71.93	82.85	75.1	38.21	56.68	71.78	54.94	59.04	55.16	63.54	60.16	59.8	79.42	95.22	99.27	98.51	79.21	52.3	19.39	31.05	24.43
HORVU.MOREX.r3.1HG0005760	TPM	0	0	0	0	0	0	0	0	0	0	0	0	0	0	0	0	0	0	0	0	0
HORVU.MOREX.r3.1HG0005770	TPM	0	0	0	0	0	0	0	0	0	0	0	0	0	0	0	0	0	0	0	0	0
HORVU.MOREX.r3.1HG0005780	TPM	13.18	17.63	15.65	6.42	7.73	6.44	5.28	5.53	5.61	3.65	4.02	4.25	4	4.8	3.97	4.2	3.83	2.58	7.48	6.52	9.5
HORVU.MOREX.r3.1HG0005790	TPM	4.43	11.5	8.57	3.03	6.27	7.49	1.13	1.52	1.35	1.43	0.9	1.07	1.2	1.84	1.14	1.59	1.71	1.85	4.22	4	5.16
HORVU.MOREX.r3.1HG0005810	TPM	20.54	17.45	17.24	17.28	19.03	16	12.8	14.27	13.85	11.54	13.07	11.57	12.88	12.88	11.51	12.27	10.95	11.27	16.68	18.38	14.61
HORVU.MOREX.r3.1HG0005830	TPM	10.51	7.35	8.7	6.54	7.36	7.77	3.73	4.69	4.61	4.12	2.96	4.35	3.39	3.49	3.53	3.08	2.88	2.97	1.45	2.04	1.98
HORVU.MOREX.r3.1HG0005840	TPM	12.98	10.86	13.3	10.04	12.51	10.23	9.04	9.97	10.22	9.03	7.95	8	7.15	6.74	8.58	6.84	6.81	6.39	13.32	16.29	12.97
HORVU.MOREX.r3.1HG0006070	TPM	0	0	0	0	0	0	0	0	0	0	0	0	0	0	0	0	0	0	0	0	0
HORVU.MOREX.r3.1HG0006080	TPM	0.34	0.43	0.18	0	0.4	0.19	0.27	0.21	0	0.26	0.13	0.14	0	0.14	0.18	0.36	0.27	0.45	0.12	0.34	0
HORVU.MOREX.r3.1HG0006090	TPM	0	0	0	0.18	0	0.09	0	0	0	0	0	0	0.09	0	0	0	0	0	0	0	0
HORVU.MOREX.r3.1HG0006100	TPM	0	0	0	0	0	0	0	0	0	0	0	0	0	0	0	0	0	0	0	0	0
HORVU.MOREX.r3.1HG0006110	TPM	0	0	0	0	0	0	0	0	0	0	0	0	0	0	0	0	0	0	0	0	0
HORVU.MOREX.r3.1HG0006120	TPM	0	0	0	0	0	0	0	0	0	0	0	0	0	0	0	0	0	0	0	0	0
HORVU.MOREX.r3.1HG0006130	TPM	29.5	23.61	3.27	2.79	0.63	0.5	4.52	6.03	9.08	3.46	0.4	0.22	3.52	1.2	3.98	0.19	0.18	0.79	11.76	94.92	46.75
HORVU.MOREX.r3.1HG0006160	TPM	0.88	0.28	0.32	0.39	0.34	0.46	0.25	0.38	0.25	0.34	0.33	0.38	0.27	0.35	0.2	0.24	0.33	0.24	0.01	0.07	0.02
HORVU.MOREX.r3.1HG0006210	TPM	4.3	8.95	8.17	1.42	2.56	1.24	0.21	0.19	0.8	1.83	0.26	0.61	1.05	1.87	0.41	1.92	2.25	5.22	0.54	0.06	0.54
HORVU.MOREX.r3.1HG0006230	TPM	6.64	3.1	4.02	4.57	3.34	4.19	2.59	2.83	2.63	2.25	2.4	3.62	2.47	3.48	2.66	2.51	2.81	3.24	0.03	0.26	0.1
HORVU.MOREX.r3.1HG0006310	TPM	0	0	0	0	0	0	0	0	0	0	0	0	0	0	0	0	0	0	0	0	0
HORVU.MOREX.r3.1HG0006340	TPM	46.29	59.57	55.09	34.61	39.52	30.39	41.88	38.74	37.9	54.8	67.1	60.34	44.6	44.71	48.48	40	58.21	64.09	35.47	43.52	58.01
HORVU.MOREX.r3.1HG0006400	TPM	23.75	17.66	19.52	18.25	17.05	15.56	13.6	13.34	14.32	7.83	8.47	10.09	12.35	10.95	12.51	9.78	8.37	9.79	4.21	3.94	6.21
HORVU.MOREX.r3.1HG0006410	TPM	0	0	0	0.04	0.18	0.02	0	0	0	0	0.05	0	0	0	0	0	0	0	0	0	0
HORVU.MOREX.r3.1HG0006420	TPM	3.86	4.48	4.6	3.46	3.11	3.59	4.94	4.6	4.48	4.39	4.5	5.26	4.8	6.2	6.69	4.82	5.54	5.86	0.79	0.69	0.98
HORVU.MOREX.r3.1HG0006430	TPM	0	0	0	0	0	0	0	0	0	0	0	0	0.02	0	0	0.02	0	0.31	0	0	0
HORVU.MOREX.r3.1HG0006440	TPM	0.14	0.21	0.14	0.09	0.91	0.47	0.42	0.3	0.26	0.59	0.36	0.19	0.19	0	0.35	0.23	0.48	0.2	0	0.08	0
HORVU.MOREX.r3.1HG0006450	TPM	0	0	0	0	0	0	0	0	0	0	0	0	0	0	0	0	0	0	0	0	0
HORVU.MOREX.r3.1HG0006460	TPM	0	0	0	0	0.16	0.1	1.27	1.22	1.32	0.16	0.16	0.22	0.74	0.17	0.1	0.05	0.05	0.09	0	0.07	0
HORVU.MOREX.r3.1HG0006480	TPM	0.84	1.16	0.84	1.05	2.1	3.73	6.64	6.73	3.19	8.22	6.11	6.96	10.59	12.12	9.73	21.18	14.65	13.78	8.17	16.7	6.8
HORVU.MOREX.r3.1HG0006490	TPM	198.88	136.2	163.35	208.62	214.33	164.48	166.66	153.11	169.81	124.2	144.02	143.09	109.88	112.12	120.59	102.22	94.45	88.93	127.75	138.03	112.75
HORVU.MOREX.r3.1HG0006500	TPM	0	0	0	0	0	0	0	0	0	0	0	0	0	0	0	0	0	0	0	0.58	0
HORVU.MOREX.r3.1HG0006530	TPM	0.09	0.03	0.06	0	0	0.02	0.02	0	0	0.02	0	0	0	0	0	0	0	0	0	0	0
HORVU.MOREX.r3.1HG0006570	TPM	263.28	269.13	245.92	303.5	269.09	267.74	402.24	415.34	360.87	411.79	347.59	377.12	321.51	309.16	278.4	280.98	308.35	295.03	108.01	187.78	133.66
HORVU.MOREX.r3.1HG0006580	TPM	41.93	41.06	42.49	45.15	37.63	36.26	79.6	86.43	107.68	106.93	120.31	106.2	126.3	127.89	137.53	109.41	126.4	92.14	148.79	159.61	143.51
HORVU.MOREX.r3.1HG0006610	TPM	47.36	29.69	22.94	216.98	250.17	467.48	232.04	267.62	159.21	165.46	158.06	181.33	119.82	133.4	144.28	133.41	107.9	115.57	44.11	95.96	21.8
HORVU.MOREX.r3.1HG0006630	TPM	0	0	0	0	0	0	0	0	0	0	0	0	0	0	0	0	0	0	0	0	1.1
HORVU.MOREX.r3.1HG0006650	TPM	23.28	8.52	8.83	176.29	179.34	373.31	203.04	246.62	151.63	165.57	147.91	170.77	133.92	143.06	150.03	156.89	117.15	102.75	26.75	58.14	7.77
HORVU.MOREX.r3.1HG0006660	TPM	75.5	70.5	46.95	57.26	72.2	51.16	21.07	22.9	21.82	20.56	17.02	19.56	15.46	11.42	14.42	10.58	11.6	10.72	13.26	22.46	8.57
HORVU.MOREX.r3.1HG0006690	TPM	32.66	23.2	30.49	35.73	28.52	27.57	38.37	35.49	36.21	31.94	36.42	43.63	33.02	36.87	38.44	34.8	33.52	48.4	4.54	8.5	6.06
HORVU.MOREX.r3.1HG0006720	TPM	0	0	0	0	0	0	0	0	0	0	0	0	0	0	0	0	0	0	0	0	0
HORVU.MOREX.r3.1HG0006730	TPM	0	0	0	0	0	0	0	0	0	0	0	0	0	0	0	0	0	0	0	0	0
HORVU.MOREX.r3.1HG0006740	TPM	0	0	0	0	0	0	0	0	0	0	0	0	0	0	0	0	0	0	0	0	0
HORVU.MOREX.r3.1HG0006770	TPM	0	0	0	0	0	0	0	0	0	0	0	0	0	0	0	0	0	0	0	0	0
HORVU.MOREX.r3.1HG0006780	TPM	0	0	0	0	0	0	0	0	0	0	0	0	0	0	0	0	0	0	0	0	0
HORVU.MOREX.r3.1HG0006820	TPM	8.86	6.64	13.25	9.21	4.67	4.69	3.94	3.44	5.02	5.43	3.97	4.01	4.27	3.78	5.08	3.12	5.34	6	1.78	1.1	4.7
HORVU.MOREX.r3.1HG0006840	TPM	11.68	11.58	11.56	13.47	6.17	1.15	3.83	4.09	14.67	10	1.18	1.25	13.4	6.75	17.93	0.52	6.05	8.77	15.76	6.46	0.82
HORVU.MOREX.r3.1HG0006880	TPM	2.87	2.19	2.25	1.4	1.49	1.63	0.37	0.49	0.56	0.56	0.32	0.29	0.51	0.41	0.36	0.23	0.22	0.37	0.09	0	0
HORVU.MOREX.r3.1HG0007100	TPM	0	0	0	0	0	0	0	0	0	0	0	0	0	0	0	0	0	0	0	0	0
HORVU.MOREX.r3.1HG0007110	TPM	0	0	0	0	0	0	0	0	0	0	0	0	0	0	0	0	0	0	0	0	0
HORVU.MOREX.r3.1HG0007160	TPM	26.33	20.55	23.68	33.07	24.95	24.69	31.99	31.48	34.53	30.87	31.39	32.07	31.03	31.53	29.22	28.24	27.76	38.76	13.32	16.34	16.81
HORVU.MOREX.r3.1HG0007170	TPM	0.43	1.09	1.26	0.55	0.54	0.73	0.5	0.25	0.47	0.14	0.18	0.23	0.16	0.34	0.25	0.21	0.18	0.18	1.49	1.98	1.92
HORVU.MOREX.r3.1HG0007200	TPM	572.15	714.54	584.7	259.24	254.26	240.55	117.44	115.29	146.21	139.96	120.18	130.4	116.09	115.95	120.8	112.59	106.93	122.37	194.34	141.67	177.79
HORVU.MOREX.r3.1HG0007220	TPM	36.73	21.21	27.95	68.17	56.06	48.31	70.55	75.45	67.78	55.78	63.52	59.8	45.47	48.66	53.25	41.59	44.13	43.51	25.44	43	32.28
HORVU.MOREX.r3.1HG0007230	TPM	56.48	55.28	59.1	40.31	45.27	33.99	30.02	31.47	30.48	27.98	28.43	29.98	27.58	30.33	28.53	29.55	27.98	37.87	19.1	23.02	22.68
HORVU.MOREX.r3.1HG0007240	TPM	0.41	0.2	0.8	2	2.23	3.26	0.06	0.28	0.25	0.11	0.06	0	0.06	0	0.22	0.16	0.11	0.38	0.44	0.15	0.22
HORVU.MOREX.r3.1HG0007250	TPM	0.15	0	0	2.04	0.56	2	0.17	0.21	0.28	0.21	0.3	0.14	0.23	0.13	0.13	0.25	0.09	0.07	0	0.06	0
HORVU.MOREX.r3.1HG0007280	TPM	0.23	0.27	0.49	0.88	0.85	1.05	0.76	0.35	0.29	0.57	0.15	0.12	0.33	0.36	0.23	0.37	0.38	0.45	0.53	0.4	0.75
HORVU.MOREX.r3.1HG0007290	TPM	55.9	50.74	58.36	59.62	55.46	46.85	40.29	37.12	39.19	30.79	34.46	36.72	29.94	37.88	32.84	27.36	34.68	40.79	47.39	46.91	51
HORVU.MOREX.r3.1HG0007300	TPM	0	0	0.61	0	0	0.17	0	0	0	0	0	0	0	0	0	0	0	0	0	0	0
HORVU.MOREX.r3.1HG0007320	TPM	0	0	0	0	0	0	0	0	0	0	0	0	0	0	0	0	0	0	0	0	0
HORVU.MOREX.r3.1HG0007330	TPM	0	0	0.53	0	0	0	0.11	0	0	0	0	0	0	0	0	0	0	0	0	0	0
HORVU.MOREX.r3.1HG0007340	TPM	0	0	0	0	0	0	0	0	0	0	0	0	0	0	0	0	0	0	0	0	0
HORVU.MOREX.r3.1HG0007360	TPM	0.64	0.66	0.7	1.46	1.74	2.47	1.37	1.46	2.06	1.77	1.05	1.2	0.81	1.06	2.03	0.68	1.26	1.25	0.28	0.38	0.31
HORVU.MOREX.r3.1HG0007370	TPM	25.13	24.96	26.36	22.02	22.41	19.01	17.85	16.97	19.34	19.35	19.08	20.03	16	16.02	17.75	16.48	15.66	18.1	5.36	6.59	7.1
HORVU.MOREX.r3.1HG0007460	TPM	0	0	0	0	0	0	0	0	0	0	0	0	0	0	0	0	0	0	0	0	0
HORVU.MOREX.r3.1HG0007510	TPM	0	0	0.36	0	0	0	0	0	0	0	0	0	0	0	0	0	0	0	0	0	0
HORVU.MOREX.r3.1HG0007520	TPM	0	0	0	0	0	0	0.04	0	0.04	0.1	0.04	0	0	0.07	0	0	0	0	0	0	0
HORVU.MOREX.r3.1HG0007570	TPM	1.02	1.79	1.01	1.17	1.53	0.63	0.38	0.1	1.86	0.36	0.57	0.27	0.84	0.77	1.45	0.09	0.38	0.8	1.46	0	0.37
HORVU.MOREX.r3.1HG0007590	TPM	0	0	0	9.39	1.4	4.06	7.35	8.95	7.78	3.72	5.39	6.64	4.83	4.07	6.08	2.1	1.89	1.95	0	0.06	0
HORVU.MOREX.r3.1HG0007600	TPM	101.63	95.08	84.7	130.8	126.72	125.96	97.27	102.23	103.38	101.46	71.45	82.38	92.44	96.99	87.56	88.88	90.02	92.2	11.5	21.98	19.31
HORVU.MOREX.r3.1HG0007610	TPM	0	0	0	0	0	0	0	0	0	0	0.21	0	0	0	0	0	0	0	0	0	0
HORVU.MOREX.r3.1HG0007620	TPM	0	0	0	0	0	0	0	0	0	0	0	0	0	0	0	0	0	0	0	0	0
HORVU.MOREX.r3.1HG0007630	TPM	0	0	0	0	0	0	0	0	0	0	0	0	0	0	0	0	0	0	0	0	0
HORVU.MOREX.r3.1HG0007690	TPM	4.69	4.12	3.65	5.03	5.11	4.79	7.62	6.57	8.7	7.71	8.17	8.87	6.67	6.63	7.69	5.52	6.81	8.47	6.76	6.73	10.9
HORVU.MOREX.r3.1HG0007700	TPM	0	0	0	0	0	0	0	0	0	0	0	0	0.26	0	0.1	0	0	0	0	0	0
HORVU.MOREX.r3.1HG0007740	TPM	15.08	2.58	5.79	38.8	92.02	61.38	8.5	5.7	9.72	6.61	1.94	2.73	3.77	0.77	2.26	0.96	0.55	1.38	0	0.47	0
HORVU.MOREX.r3.1HG0007770	TPM	0	0	0	0.04	0.18	0	0.23	0.25	0.13	0	0.02	0	0.21	0	0.13	0	0.51	0.31	0	0	0
HORVU.MOREX.r3.1HG0007840	TPM	37.14	34.66	36.77	47.55	42.49	39.41	60.86	55.83	61.91	61.51	62.91	67.7	69.55	66.01	67.69	65.51	68.36	68.38	41.83	40.52	49.66
HORVU.MOREX.r3.1HG0007850	TPM	64.6	58.96	65.54	63.87	54.11	51.1	55.05	51.07	58.44	61.93	60.96	65.37	59.46	64.79	65.08	59.11	65.67	75.91	24.83	36.95	37.43
HORVU.MOREX.r3.1HG0007900	TPM	0	0	0	0.05	0	0	0.07	0.27	0.11	0.03	0.14	0.11	0.15	0.11	0.17	0.16	0.1	0.17	0	0	0
HORVU.MOREX.r3.1HG0007910	TPM	12.38	6.85	8.06	19.96	17.52	14.44	16.94	14.66	14.84	13.14	14.95	16.13	16.95	17.69	17.31	15.83	13.33	19.75	4.07	5.5	4.71
HORVU.MOREX.r3.1HG0007940	TPM	0.1	4.7	0.82	2.81	8.26	0	0.69	0.26	11.12	2.58	0	0	0.66	0	2.49	0	4.72	0.29	1.66	0	17.62
HORVU.MOREX.r3.1HG0007950	TPM	0	0	0	0	0	0	0	0	0	0	0	0	0	0	0	0	0	0	0	0	0
HORVU.MOREX.r3.1HG0007970	TPM	0	0	0	0	0	0	0	0	0	0	0	0	0	0	0	0	0	0	0	0	0
HORVU.MOREX.r3.1HG0008000	TPM	0	0	0	0	0	0	0	0	0	0	0	0	0	0	0	0	0	0	0	0	0
HORVU.MOREX.r3.1HG0008070	TPM	4.25	4.59	4.37	1.46	2.04	2.51	2.02	2.1	1.89	2.09	2.07	2.2	2.01	2.82	2.98	3.13	3.02	1.92	1.59	1.16	1.39
HORVU.MOREX.r3.1HG0008080	TPM	0.17	0.1	0.2	11.93	4.11	10.27	55.5	51.64	39.13	59.55	66.55	68.08	95.15	86.51	116.37	95.53	76.23	61.52	0.05	0.04	0.07
HORVU.MOREX.r3.1HG0008100	TPM	0	0	0	0	0	0	0	0	0	0	0	0	0	0	0	0	0	0	0	0	0
HORVU.MOREX.r3.1HG0008130	TPM	0.39	0.13	0	6.89	2.7	7.41	16.1	17.07	12.97	16.22	21.1	23.46	36.21	28.36	38.7	33.98	21.97	20.04	0	0.09	0.05
HORVU.MOREX.r3.1HG0008140	TPM	1.64	0.84	1.18	35.69	18.16	28.75	122.39	139.59	102.35	128.06	139.95	160.77	187.96	158.81	226.05	151.16	128.37	104.46	0.21	1.3	0.43
HORVU.MOREX.r3.1HG0008150	TPM	0	0	0	0	0	0	0	0	0	0	0	0	0	0.05	0	0	0	0	0	0	0
HORVU.MOREX.r3.1HG0008160	TPM	0	0	0	0	0	0	0	0	0	0	0	0	0	0	0	0	0	0	0	0	0
HORVU.MOREX.r3.1HG0008290	TPM	0	0	0	0.06	0.04	0	0.7	0.62	0.53	1.1	0.79	1	3.21	2.5	4.06	3.58	1.61	1.72	0	0	0
HORVU.MOREX.r3.1HG0008310	TPM	0.63	0.26	0.13	3.72	1.81	1.4	16.92	14.09	11.54	15.06	19.66	20.87	25.02	19.99	37.03	21.12	15.97	13.27	0.12	0.57	0.11
HORVU.MOREX.r3.1HG0008320	TPM	0.17	0.33	0.08	0.16	0	0.03	0	0.03	0.04	0	0	0.07	0.08	0.04	0	0.03	0.14	0	0.15	0	0
HORVU.MOREX.r3.1HG0008380	TPM	3.78	3.18	3.18	5.95	4.29	5.26	6.6	6.12	5.57	5.62	5.46	6.12	4.28	5.51	5.87	4.26	4.5	6.16	0.27	1.27	1.58
HORVU.MOREX.r3.1HG0008390	TPM	3.6	1.54	2.85	3.73	3.96	3.11	1.68	0.75	1.62	1.3	1.13	0.99	2.43	1.57	1.11	1.07	1.13	2.81	0.16	0.24	0.49
HORVU.MOREX.r3.1HG0008400	TPM	10.31	9.35	11.55	8.65	8.53	8.75	14.13	14.01	11.33	12.94	16.49	15.05	13.42	12.26	13.5	11.85	14.62	10.97	5.48	8.56	8.05
HORVU.MOREX.r3.1HG0008410	TPM	0	0	0	0	0	0.1	0	0	0	0	0	0	0	0	0	0	0	0	0	0	0
HORVU.MOREX.r3.1HG0008440	TPM	225.98	346.91	264.52	380.91	292.48	324.66	1488.95	1522.43	1166.63	1762.23	2122.48	1956.33	2400.57	2316.19	2364.65	2943.9	2516.11	1954.18	690.59	883.84	679.43
HORVU.MOREX.r3.1HG0008450	TPM	96.06	61.05	62.49	145.44	119.64	147.05	252.79	280.71	231.13	267.31	272.53	280.18	268.02	245.95	255.28	276.1	327.16	191.94	129.91	306.16	192.42
HORVU.MOREX.r3.1HG0008460	TPM	0	0	0	0	0	0	0	0	0	0	0	0	0	0	0	0	0	0	0.06	0.45	0
HORVU.MOREX.r3.1HG0008470	TPM	0	0	0	0	0	0	0	0	0	0	0	0	0	0	0	0	0	0	0	0	0
HORVU.MOREX.r3.1HG0008490	TPM	0	0	0	0	0	0	0	0	0	0	0	0	0	0	0	0	0	0	0	0	0
HORVU.MOREX.r3.1HG0008500	TPM	0	0	0	0	0	0	0	0	0	0	0	0	0	0	0	0	0	0	0	0	0
HORVU.MOREX.r3.1HG0008510	TPM	30.58	25.5	28.01	60.02	43.53	43.73	77.6	77.62	83.33	69.37	96.36	83.54	93.89	81.53	89.54	75.64	79.54	87.93	35.97	49.63	44.45
HORVU.MOREX.r3.1HG0008520	TPM	36.26	26.66	30.01	30.51	31.43	28.82	21.2	23.11	24.28	23.35	22.55	22.07	20.81	21.03	19.9	19.01	19.77	21.07	5.15	9.4	11.65
HORVU.MOREX.r3.1HG0008600	TPM	29.44	39.89	31.59	13.44	18.9	11.74	8.36	8.74	8.16	14.82	7.64	9.45	9.68	11.01	11.54	8.55	12.54	13.93	9.54	7.06	6.24
HORVU.MOREX.r3.1HG0008610	TPM	0.59	0.48	0.76	1.88	1.15	1.67	0.57	0.74	0.71	0.81	0.57	0.26	1.06	1.03	1.21	0.47	0.65	1.36	1.34	0.1	0.21
HORVU.MOREX.r3.1HG0008620	TPM	51.97	42.83	47.52	51.12	51.55	48.09	51.59	50.44	51.83	44.12	47.78	49.06	41.31	46.7	41.16	34.18	37.97	46.05	28.06	38.12	39.06
HORVU.MOREX.r3.1HG0008630	TPM	0	0	0	0	0	0	0	0	0	0	0	0	0	0	0	0	0	0	0	0	0
HORVU.MOREX.r3.1HG0008640	TPM	1.89	2.69	2.18	2.2	6.06	12.85	4	5.32	5.43	5.1	5.48	3.04	8.68	7.97	9.75	13.69	8.76	7.88	3.47	2.58	3.36
HORVU.MOREX.r3.1HG0008650	TPM	93.65	80.31	82.98	97.48	78.08	74.61	79.94	74.58	81.74	73.01	69.5	74.58	65	65.76	67.44	57.18	62.44	74.66	32.78	54.57	55.1
HORVU.MOREX.r3.1HG0008660	TPM	0.18	0	0	0.12	0.08	0.22	0.38	0.08	0.25	0.15	0.08	0.08	0	0	0.15	0	0	0	0	0	0
HORVU.MOREX.r3.1HG0008680	TPM	0	0	0.1	0.04	0.12	0	0	0.17	0.35	0.11	0	0	0.19	0.03	0.17	0	0.06	0.05	0	0	0
HORVU.MOREX.r3.1HG0008690	TPM	0	0	0	0	0	0	0	0	0	0	0	0	0	0	0	0	0	0	0	0	0
HORVU.MOREX.r3.1HG0008790	TPM	0.73	0.12	0.36	10.65	9.24	14.62	12.67	15.38	9.9	24.71	8.85	13.74	20.64	36.8	10.95	28.96	28.53	15.48	0.02	0.07	1.2
HORVU.MOREX.r3.1HG0008810	TPM	19.93	12.15	11.76	211.58	186.56	204.08	129.22	147.98	167.98	99.38	107.51	104.14	74.07	95.78	67.41	95.2	221.43	72.18	49.06	75.77	38.25
HORVU.MOREX.r3.1HG0008820	TPM	111.81	84.62	101.85	131.19	112.63	111.11	99.35	97.43	113.8	91.19	95.31	91.33	84.45	80.67	89.87	82.07	73.54	70.25	64.13	89.15	110.62
HORVU.MOREX.r3.1HG0008840	TPM	0.25	0.24	0.29	0.26	0.17	0.28	0.25	0.25	0.22	0.04	0.04	0.22	0.27	0.26	0.04	0.12	0.33	0.49	0.47	0.11	0.38
HORVU.MOREX.r3.1HG0008860	TPM	3.45	2.74	2.74	2.64	4.84	5.84	0.98	0.82	0.93	0.45	0.5	0.48	0.58	0.22	0.53	0.9	0.33	0.27	0.28	1.11	1.13
HORVU.MOREX.r3.1HG0008890	TPM	80.65	81.54	87.27	60.65	67.85	64.33	47.85	47.71	59.07	50.06	55.21	52.51	71.91	64.87	66.58	77.93	67.45	62.5	79.99	84.73	110.42
HORVU.MOREX.r3.1HG0008900	TPM	11.57	7.4	9.8	2.99	7.31	6.96	1.15	1.48	1.52	0.86	0.33	0.65	0.94	0.87	0.75	1.27	0.51	0.36	4.28	2.88	1.98
HORVU.MOREX.r3.1HG0008910	TPM	2.33	0	0	0	0	0	0	0	0	0	0	0	0	0	0	0	0	0	0	0	0
HORVU.MOREX.r3.1HG0008930	TPM	0	0	0	0	0	0	0	0	0	0	0	0	0	0	0	0	0	0	0	0	0
HORVU.MOREX.r3.1HG0008950	TPM	4.29	3.68	5.24	4.12	4.94	5.01	2.48	2.69	2.53	2.36	1.56	1.78	2.44	2.1	2.54	1.85	1.72	1.01	1.79	1.55	2.98
HORVU.MOREX.r3.1HG0008980	TPM	2.13	3.08	2.53	1.41	3.7	3.84	1.63	1.97	2.13	2.4	1.19	1.46	1.85	2.89	1.81	2.13	2.04	2.3	2.5	2.53	2.31
HORVU.MOREX.r3.1HG0009000	TPM	0	0	0	0	0	0	0	0	0	0	0	0	0	0	0	0	0	0	0	0	0
HORVU.MOREX.r3.1HG0009020	TPM	0	0	0	0	0.09	0	0	0	0	0	0	0	0	0	0	0	0	0	0	0	0
HORVU.MOREX.r3.1HG0009050	TPM	7.62	10.45	6.63	13.79	29.01	64.71	17.76	13.71	13.15	11.72	9.8	12.83	22.8	23.93	24.64	26.33	20.52	21.06	1.64	0.39	1.38
HORVU.MOREX.r3.1HG0009100	TPM	0	0.15	0	0	0	0	0	0	0.08	0	0	0	0	0	0	0	0	0.14	0	0.18	0
HORVU.MOREX.r3.1HG0009110	TPM	0.63	0.68	0.88	0.55	1.19	1.55	0.44	0.77	0.53	0.36	0.36	0.26	0.36	0.59	0.6	0.57	0.4	0.33	1.17	0.83	0.78
HORVU.MOREX.r3.1HG0009120	TPM	1.01	0.85	0.71	2.57	1.69	1.19	2.01	2.79	2.51	2.22	5.17	1.82	2.35	2.72	2.74	1.82	2.79	2.78	1.98	1.18	1.29
HORVU.MOREX.r3.1HG0009210	TPM	15.24	11.08	10.72	8.97	9.72	7.35	5.53	5.93	6.21	3.08	2.98	4.75	3.78	3.7	4.31	2.16	2.13	3.3	0.1	0.24	0.27
HORVU.MOREX.r3.1HG0009220	TPM	0	0	0	0	0	0	0	0	0	0	0	0	0	0	0	0	0	0	0	0	0
HORVU.MOREX.r3.1HG0009270	TPM	0	0.12	0	0.05	0	0.38	0	0	0.11	0	0	0	0	0	0	0	0	0	0	0	0
HORVU.MOREX.r3.1HG0009360	TPM	53.54	34.49	47.86	53.71	49.81	43.32	32.13	29.12	45.64	22.78	15.33	14.89	18.76	18.3	24.1	10.55	16.95	19.45	42.73	34.88	42.95
HORVU.MOREX.r3.1HG0009380	TPM	0	0	0	0	0	0	0	0	0	0	0	0	0	0	0	0	0	0	0	0	0
HORVU.MOREX.r3.1HG0009390	TPM	0	0	0	0.11	0	0.01	0.2	0.12	0.07	0.11	0.14	0.37	0.21	0.3	0.27	0.29	0.11	0.23	0	0	0
HORVU.MOREX.r3.1HG0009400	TPM	0	0	0	0	0.02	0	0	0	0	0	0	0	0	0	0	0	0.02	0	0	0	0
HORVU.MOREX.r3.1HG0009420	TPM	10.19	6.04	6.93	13.95	9.57	9.46	10.39	9.73	9.88	8.47	9.46	11.65	9.55	9.06	9.74	7.81	8.37	10	2.07	3.44	1.75
HORVU.MOREX.r3.1HG0009450	TPM	1.85	1.81	1.81	1.97	0.78	2.13	30.4	32.53	19.91	32.06	42.87	39.64	56.41	51.32	45.16	63.57	84.91	41.63	169.76	89.06	63.8
HORVU.MOREX.r3.1HG0009460	TPM	0.1	0.14	0	0.25	0.08	0.4	0.36	0.81	0.4	1.4	0.49	0.56	1.89	4.6	0.76	0.85	1.47	0.95	0	0	0.11
HORVU.MOREX.r3.1HG0009470	TPM	0	0	0	0	0	0	0	0	0	0	0	0	0	0	0	0	0	0	0	0	0
HORVU.MOREX.r3.1HG0009480	TPM	0.06	0.21	0.36	0.4	0.26	0.83	2.25	1.66	0.98	6.81	2.35	6.47	4.35	7.64	2.99	6.49	5.01	7.1	0.02	0	0.98
HORVU.MOREX.r3.1HG0009490	TPM	0.25	0.21	0.18	0.6	0.34	0.25	0.21	0.05	0.14	0.51	0.13	0.25	0.28	0.49	0.15	0.52	0.44	0.74	0	0	0.7
HORVU.MOREX.r3.1HG0009610	TPM	0	0	0	0	0	0	0	0	0	0	0	0	0	0	0	0	0	0.2	0	0	0
HORVU.MOREX.r3.1HG0009630	TPM	0	0	0	0	0	0	0	0	0	0	0	0.03	0	0	0	0	0	0	0	0	0.13
HORVU.MOREX.r3.1HG0009640	TPM	0	0	0	0	0	0	0	0	0	0	0	0	0	0	0	0	0	0	0	0	0
HORVU.MOREX.r3.1HG0009650	TPM	0	0	0	0	0	0	0	0	0	0	0	0	0	0	0	0	0	0	0	0	0
HORVU.MOREX.r3.1HG0009670	TPM	0	0	0	0	0	0	0	0	0	0	0	0	0	0	0	0	0	0	0	0	0
HORVU.MOREX.r3.1HG0009680	TPM	0	0	0	0	0	0	0	0	0	0	0	0	0	0	0	0	0	0	0	0	0
HORVU.MOREX.r3.1HG0009730	TPM	0	0	0	0	0	0	0	0	0	0	0	0	0	0	0	0	0	0	0	0	0
HORVU.MOREX.r3.1HG0009740	TPM	0	0	0	0	0.11	0	0	0	0	0	0	0	0	0	0	0	0	0	0	0	0.05
HORVU.MOREX.r3.1HG0009760	TPM	0	0	0	0	0	0	0	0	0	0	0	0	0	0	0	0	0	0	0	0	0
HORVU.MOREX.r3.1HG0009770	TPM	0.21	0	0.07	0.18	0.35	0.11	0.52	0.23	0.38	0.35	0.82	0.56	0.63	0.61	0.69	0.78	0.82	0.78	0	0	0
HORVU.MOREX.r3.1HG0009810	TPM	0.21	0	0.07	0.18	0.35	0.11	0.52	0.23	0.38	0.35	0.82	0.56	0.63	0.61	0.69	0.78	0.82	0.78	0	0	0
HORVU.MOREX.r3.1HG0009860	TPM	0.11	0	0.21	0	0	0.26	0	0	0	0	0	0	0	0	0	0	0.09	0	0.23	0	0.46
HORVU.MOREX.r3.1HG0009870	TPM	0	0	0	0	0	0	0	0	0	0	0	0	0	0	0	0	0	0	0	0	0
HORVU.MOREX.r3.1HG0009920	TPM	0	0	0	0	0	0	0.03	0.04	0	0	0	0	0	0	0	0	0	0	0	0.02	0
HORVU.MOREX.r3.1HG0009930	TPM	0.08	0.31	0	2.36	1.28	4.54	3.13	3.42	2.68	1.19	0.81	0.71	1.59	1.61	0.79	1.4	2.14	1.21	0.06	0.6	0
HORVU.MOREX.r3.1HG0009940	TPM	0	0	0	0	0	0	0	0	0	0	0	0	0	0	0	0	0	0	0	0	0
HORVU.MOREX.r3.1HG0009950	TPM	0	0	0	0	0	0	0	0	0	0	0	0	0	0	0	0	0	0	0	0	0
HORVU.MOREX.r3.1HG0009960	TPM	0	0	0	0	0	0	0	0	0	0	0	0	0	0	0	0	0	0	0	0	0
HORVU.MOREX.r3.1HG0010020	TPM	0.52	0	0.25	0.66	0.11	0.74	0.32	0.22	0	0.43	0.33	0.69	0.12	0.57	0.32	0.21	0.11	0.54	0	0	0
HORVU.MOREX.r3.1HG0010030	TPM	0.4	0.17	0.13	0.28	0.3	0.29	0.11	0.34	0.24	0.25	0.22	0.2	0.32	0.24	0.33	0.34	0.14	0.18	0.06	0	0
HORVU.MOREX.r3.1HG0010060	TPM	0	0	0	0	0	0	0	0	0	0	0	0	0	0	0	0	0	0	0	0	0
HORVU.MOREX.r3.1HG0010070	TPM	0	0	0	0	0	0	0	0	0	0	0	0	0	0	0	0	0	0	0	0	0
HORVU.MOREX.r3.1HG0010080	TPM	0	0	0	0.03	0	0	0.04	0	0.03	0.06	0.11	0.03	0.05	0.08	0.04	0	0.03	0.03	0	0	0
HORVU.MOREX.r3.1HG0010090	TPM	0	0	0	0	0	0	0	0	0	0	0	0	0	0	0	0	0	0	0	0	0
HORVU.MOREX.r3.1HG0010130	TPM	0	0	0	0	0	0	0	0	0	0	0	0	0	0	0	0	0.03	0	0	0	0
HORVU.MOREX.r3.1HG0010140	TPM	0	0	0	0	0	0	0	0.25	0	0.14	0	0	0	0	0	0	0	0.18	0	0	0
HORVU.MOREX.r3.1HG0010170	TPM	0	0	0	0.07	0	0	0.09	0	0	0	0.22	0.05	0.19	0.05	0.09	0	0.09	0	0	0	0
HORVU.MOREX.r3.1HG0010270	TPM	0	0	0	0	0	0	0	0	0	0	0	0	0	0	0	0	0	0	0	0	0
HORVU.MOREX.r3.1HG0010310	TPM	0	0	0	0	0	0	0	0	0	0	0	0	0	0	0	0	0	0	0	0	0
HORVU.MOREX.r3.1HG0010330	TPM	0.89	0.29	0.79	0.57	0.25	2.35	0.62	0.68	0.67	0.49	0.43	0	0.4	0.52	0.73	0.41	0.19	0.62	0.43	0.24	0.08
HORVU.MOREX.r3.1HG0010340	TPM	0	0	0	0.1	0.06	0.83	0.06	0.07	0.07	0	0	0.14	0.21	0.07	0	0.18	0	0.23	0	0	0
HORVU.MOREX.r3.1HG0010350	TPM	0.05	0.27	0.36	0	0	0.07	0	0.02	0	0.04	0	0	0.1	0	0.06	0	0	0	0	0.63	0
HORVU.MOREX.r3.1HG0010370	TPM	48.96	38.07	48.12	47.91	42.16	38.73	35.75	33.56	35.01	29.35	27.33	36.13	28.09	31.16	30.16	26.28	27.28	33.92	6.7	12.96	9.85
HORVU.MOREX.r3.1HG0010380	TPM	0.06	0	0	0.08	0	0.05	0.11	0.27	0.06	0	0.05	0	0.11	0.28	0.26	0.3	0.85	0.09	0	0	0.07
HORVU.MOREX.r3.1HG0010400	TPM	0	0	0	0	0	0	0	0	0	0	0	0	0	0	0	0	0	0	0	0	0
HORVU.MOREX.r3.1HG0010450	TPM	0.4	0.13	0.08	2.88	6.07	7.46	3.03	6.88	8.59	4.69	7.9	6.39	4.7	5.81	4.83	3.37	4.47	4.43	0.23	0.11	2.28
HORVU.MOREX.r3.1HG0010470	TPM	188.62	175.02	189.24	151.81	139.08	120.21	151.49	139.05	135.05	167.23	158.15	141.26	131.67	130.09	120.19	157.03	155.15	122.66	241.83	241.91	267.81
HORVU.MOREX.r3.1HG0010480	TPM	0	0	0	0	0	0	0	0	0	0	0	0	0	0	0	0	0	0	0	0	0
HORVU.MOREX.r3.1HG0010490	TPM	137.9	115.99	131.6	110.71	115.61	113.4	119.42	116.48	127.73	118.18	132.91	125.99	123.51	126.61	132.32	122.08	122.94	163.64	131.9	138.31	164.71
HORVU.MOREX.r3.1HG0010520	TPM	0	0	0	0	0	0	0	0	0	0	0	0	0	0	0	0	0	0	0	0	0
HORVU.MOREX.r3.1HG0010530	TPM	42.91	43.41	38.44	35.79	41.26	39.07	24.03	23.45	31.5	26.65	22.13	23.72	27.77	30.79	29.86	24.06	23.67	25.95	17.55	20.65	34.51
HORVU.MOREX.r3.1HG0010600	TPM	0	0.04	0	0	0	0	0.07	0.69	0	3.32	0.03	0.95	1.89	4.28	2.4	2.19	5.77	4.76	0	0	0
HORVU.MOREX.r3.1HG0010610	TPM	0.98	1.19	1.25	1.01	2.05	3.52	1.82	1.33	1.49	1.46	1.48	1.24	1.82	1.55	1.55	2.23	1.63	1.02	3.48	2.95	1.93
HORVU.MOREX.r3.1HG0010620	TPM	0	0	0	0	0	0	0	0	0	0	0	0	0	0	0	0	0	0	0	0	0
HORVU.MOREX.r3.1HG0010640	TPM	0.91	0.33	0.37	7.4	1.45	4.59	7.23	9.44	7.16	2.4	4.33	4.36	7.81	9	8.18	8.23	6.52	7	1.28	1.13	1.09
HORVU.MOREX.r3.1HG0010650	TPM	0	0	0	3.59	1.09	3.52	4.94	5.7	2.63	5.44	5.99	3.64	3.12	3.12	4.27	3.88	2.35	1.81	0	0	0
HORVU.MOREX.r3.1HG0010660	TPM	47.52	22.07	29.07	58.91	71.28	105.73	43.9	54.24	38.46	54.5	83.18	52.36	46.32	36.7	47.28	56.69	35.06	28.38	10.59	54.47	12.97
HORVU.MOREX.r3.1HG0010690	TPM	0	0	0	0	0	0	0	0	0	0	0	0	0	0	0	0	0	0	0	0	0
HORVU.MOREX.r3.1HG0010700	TPM	0	0	0	0	0	0	0	0	0	0	0	0	0	0	0	0	0	0	0	0	0
HORVU.MOREX.r3.1HG0010720	TPM	0	0	0	0	0	0	0	0	0	0	0	0	0	0	0	0	0	0	0	0	0
HORVU.MOREX.r3.1HG0010730	TPM	0	0	0	0	0	0	0	0	0	0.01	0	0	0.01	0	0	0	0	0	0	0.02	0
HORVU.MOREX.r3.1HG0010750	TPM	0	0	0	0	0	0	0	0	0	0	0	0	0	0	0	0	0	0	0	0	0
HORVU.MOREX.r3.1HG0010780	TPM	0	0	0	0	0	0	0	0	0	0	0	0	0	0	0	0	0	0	0	0	0
HORVU.MOREX.r3.1HG0010790	TPM	0.09	0.04	0.14	0.24	0.09	0.27	0.02	0.02	0.06	0.04	0.01	0.02	0.04	0	0.02	0.01	0.03	0	0.04	0.3	0.12
HORVU.MOREX.r3.1HG0010800	TPM	0.41	0.12	0.16	0.16	0.27	0.63	0.51	0.44	0.07	0.13	0.24	0.14	0.59	0.39	0.37	0.42	0.24	0.11	0.15	0.39	0.18
HORVU.MOREX.r3.1HG0010810	TPM	0	0	0	0	0	0	0	0	0	0	0	0	0	0	0	0	0	0	0	0	0
HORVU.MOREX.r3.1HG0010840	TPM	0	0	0	0	0	0	0	0.08	0.08	0	0	0	0	0	0	0	0	0.39	0	0	0
HORVU.MOREX.r3.1HG0010890	TPM	403.94	434.45	359.46	400.82	326.62	470.6	699.1	769.37	587.57	537.89	474.36	462.54	625.52	578.95	481.96	594.54	650.2	500.4	827.18	878.04	535.59
HORVU.MOREX.r3.1HG0010920	TPM	3.12	4.3	3.09	13.92	14.82	22.51	29.84	28.79	25.25	25.68	26.36	25.6	30.33	29.1	29.43	25.72	26.01	15.45	5.17	14.76	7.4
HORVU.MOREX.r3.1HG0010930	TPM	62.94	63.55	61.31	84.95	116.09	115.62	55.85	55.23	58.32	43.03	43.37	43.39	41.43	48.03	50.71	46.08	62.3	27.65	51.04	59.72	51.77
HORVU.MOREX.r3.1HG0010950	TPM	0	0	0	0	0	0	0	0	0	0	0	0	0	0	0	0	0	0	0	0	0
HORVU.MOREX.r3.1HG0010970	TPM	0.16	0	0.23	0	0	0.13	0	0	0	0	0	0.07	0	0	0	0	0	0	0	0	0
HORVU.MOREX.r3.1HG0010980	TPM	0	0	0	0	0	0	0	0	0	0.09	0	0	0	0	0	0.09	0	0	0	0	0
HORVU.MOREX.r3.1HG0010990	TPM	0	0	0	0	0	0	0	0	0	0	0	0	0	0	0	0	0	0	0	0	0
HORVU.MOREX.r3.1HG0011010	TPM	1.51	1.19	0.51	0.92	0	0	1.81	0.65	1.35	0.21	2.19	2.78	1.89	1.36	3.8	2.35	2.07	4.92	1.38	2.11	4.79
HORVU.MOREX.r3.1HG0011020	TPM	31.7	30.16	31.6	28.64	27.01	24.41	27.71	23.4	25.44	21.74	27.76	27.64	24.48	26.91	26.74	24.43	24.21	23.8	16.79	19.88	14.06
HORVU.MOREX.r3.1HG0011080	TPM	0	0	0	0	0	0	0	0	0	0	0	0	0	0	0	0	0	0	0	0	0
HORVU.MOREX.r3.1HG0011090	TPM	0	0	0	0	0	0	0	0	0	0	0	0	0.12	0	0	0	0.11	0	0	0	0
HORVU.MOREX.r3.1HG0011100	TPM	0	0	0	0	0	0	0	0	0	0	0	0	0	0	0	0	0	0	0	0	0
HORVU.MOREX.r3.1HG0011110	TPM	57.89	71.97	70.39	32.91	37.7	28.01	41.53	41.58	44.75	44	49.94	50.66	50.26	55.19	54.6	51.08	50.82	51.48	28.39	30.59	39.87
HORVU.MOREX.r3.1HG0011130	TPM	0	0	0	0	0	0	0	0	0	0	0	0	0	0	0	0	0	0	0	0	0
HORVU.MOREX.r3.1HG0011140	TPM	0	0	0	0	0	0	0	0	0	0	0	0	0	0	0	0	0	0	0	0	0
HORVU.MOREX.r3.1HG0011170	TPM	8.82	9.14	10.76	7.67	11.45	11.37	6.87	5.1	6.43	4.32	4.08	4.16	5.02	4.92	4.4	4.91	4.83	4.59	3.94	10.09	8.71
HORVU.MOREX.r3.1HG0011180	TPM	42.84	35.06	46.17	29.87	26.49	23.53	28.24	27.94	28.46	28.51	27.78	31.05	29.27	29.93	30.25	22.14	29.32	30.28	9.88	22.18	22.72
HORVU.MOREX.r3.1HG0011190	TPM	19.1	11.21	12.08	21.88	15.76	20.05	19.37	17.97	17.22	19.46	17.09	21.61	17.45	17.45	20.18	16.62	15.61	22.82	1.06	4.13	1.55
HORVU.MOREX.r3.1HG0011220	TPM	0.05	0	0.36	0	0.18	0.07	0	0.02	0	0.04	0	0	0	0	0	0	0	0.4	0.74	0.63	1.15
HORVU.MOREX.r3.1HG0011250	TPM	1.51	1.23	1.16	0.8	0.74	0.75	0.52	0.74	0.58	0.65	0.59	0.85	0.81	1.02	0.91	0.87	0.92	1.07	0.72	0.87	0.7
HORVU.MOREX.r3.1HG0011260	TPM	0	0	0	0	0	0	0	0	0	0	0	0	0	0	0	0	0	0	0	0	0
HORVU.MOREX.r3.1HG0011270	TPM	21.69	22.87	24.14	17.62	15.14	15.26	22.81	20.3	24.33	27.1	29.29	32.21	31.38	31.06	32.37	31.99	30.99	40.76	7.06	6.52	6.64
HORVU.MOREX.r3.1HG0011280	TPM	0	0	0	0	0	0	0	0	0	0	0	0	0	0	0	0	0	0	0	0	0
HORVU.MOREX.r3.1HG0011360	TPM	31.28	16.77	20.56	37.55	35.33	31.29	35.05	34.27	37.79	30.69	34.06	28.85	41.03	34.03	35	32.79	38.87	26.66	34.99	39.86	40.98
HORVU.MOREX.r3.1HG0011370	TPM	3.7	2.07	2.83	6.83	6.57	6	10.54	9.83	9.57	8.12	10.01	11.58	10.12	12.17	11.93	7.76	8.63	11.34	2.77	3.43	3.43
HORVU.MOREX.r3.1HG0011380	TPM	30.26	26.1	32.19	23.88	23.4	20.64	26.79	27.43	29.39	26.75	28.52	29.34	30	33.95	31.84	28.79	29.93	36.09	31.95	33.58	34.18
HORVU.MOREX.r3.1HG0011400	TPM	0.3	0.76	0.81	1.02	0.34	0.23	0.76	0.66	0.67	0.35	0.72	0.82	0.79	0.8	0.67	0.56	0.84	0.8	0.18	0.33	0.3
HORVU.MOREX.r3.1HG0011440	TPM	0.21	0.2	0.15	0.37	0.55	1.65	0.09	0.22	0	0	0.13	0.09	0.14	0.05	0	0.21	0	0.07	0.11	0	0.06
HORVU.MOREX.r3.1HG0011450	TPM	1.3	1.59	1.25	0.95	0.77	0.97	0.83	0.9	0.92	0.76	0.72	0.79	0.72	1	1.14	0.86	1.05	1.33	0.35	0.62	0.22
HORVU.MOREX.r3.1HG0011510	TPM	0.63	0.54	0.57	0.42	0.44	0.43	0.44	0.36	0.35	0.23	0.33	0.11	0.12	0.14	0.37	0.18	0.21	0	0.32	0.3	0.46
HORVU.MOREX.r3.1HG0011540	TPM	0	0	0	0	0	0	0	0	0.05	0	0	0	0	0	0	0	0	0	0	0	0
HORVU.MOREX.r3.1HG0011550	TPM	0	0	0	0	0	0	0	0	0	0.12	0	0	0	0	0	0	0	0	0	0.2	0
HORVU.MOREX.r3.1HG0011560	TPM	1.11	1.27	1.31	0.94	0.49	0.58	0.61	0.35	0.81	0.53	0.2	0.8	0.72	0.55	0.62	0.59	0.4	0.65	0.29	0.15	0.1
HORVU.MOREX.r3.1HG0011570	TPM	0	0	0	0	0.12	0	0	0	0	0	0	0	0	0	0	0	0	0	0	0	0
HORVU.MOREX.r3.1HG0011590	TPM	1.44	1.34	1.46	1.15	0.93	1.1	0.91	0.97	1.45	0.99	0.85	0.85	1.05	1.36	0.74	0.76	1.2	1.78	0.67	0.53	0.4
HORVU.MOREX.r3.1HG0011660	TPM	0	0	0.05	0.09	0.16	0.21	0.09	0	0	0.13	0	0.05	0	0	0.04	0	0.04	0.07	0	0	0
HORVU.MOREX.r3.1HG0011680	TPM	1.33	1.82	1.9	1.18	1.22	1	1.21	1.28	1.04	1.03	1.31	1.36	1.39	1.15	0.92	1.04	1.15	0.94	0.71	1.13	1.4
HORVU.MOREX.r3.1HG0011700	TPM	1.99	1.82	1.54	0.97	1.36	1.01	1.21	0.81	1.15	0.87	0.63	1.19	1.32	0.41	0.93	0.94	1.17	2.55	0	0.52	1.04
HORVU.MOREX.r3.1HG0011730	TPM	1.69	1.67	2.2	2.38	1.2	1.78	1.4	0.88	1.31	0.9	1.19	1.54	1.26	2.02	1.16	1.26	0.93	1.16	1.43	1.35	1.22
HORVU.MOREX.r3.1HG0011760	TPM	2.44	2.92	3.21	1.79	1.06	0.98	1.23	1.27	1.1	1.22	1.24	1.87	1.62	1.68	1.17	1.47	1.69	1.66	0.45	0.82	0.8
HORVU.MOREX.r3.1HG0011790	TPM	2.77	3.59	3.38	3.09	2.09	1.76	1.86	1.9	1.93	2.39	1.76	2.73	2.46	2.91	3.05	2.59	3.01	3.85	1.14	2.29	2.29
HORVU.MOREX.r3.1HG0011820	TPM	0.07	0.53	0.2	0.87	0.4	0.56	0.17	0.23	0.68	0.06	0.17	0.12	0.06	0.06	0	0.05	0	0.1	0.1	0.44	0.15
HORVU.MOREX.r3.1HG0011870	TPM	13.61	4.69	5.78	16.98	28.33	31.13	6.62	5.64	7.09	4.8	2.57	3.53	3.69	3.75	3.61	6.26	2.13	1.99	1.48	1.32	0.78
HORVU.MOREX.r3.1HG0011880	TPM	1.59	1.11	1.55	2.32	2.1	5.54	0.19	0	0.21	0	0.95	0	0	0.8	0.75	0.36	0.38	0	2.62	1.46	3.21
HORVU.MOREX.r3.1HG0011890	TPM	37.76	46.64	49.05	21.14	25.54	21.45	26.31	23.67	25.33	31.98	32.82	34.08	35.25	39.35	39.3	43.89	46.66	36.09	81.85	68.56	86.16
HORVU.MOREX.r3.1HG0011900	TPM	5.02	0.96	2.24	32.04	20.9	36.37	8.63	9.63	8.23	5.71	3.61	5.88	5.74	6.47	5.39	4.7	3.6	5.61	0.78	1.71	1.73
HORVU.MOREX.r3.1HG0011910	TPM	1.27	3.27	2.03	0.69	0.18	1.1	0	0	0.09	0	0.08	0	0	0	0	0	0	0	0.86	0.71	0.32
HORVU.MOREX.r3.1HG0011960	TPM	0	0	0	0	0	0	0	0	0	0	0	0	0	0	0	0	0	0	0	0	0
HORVU.MOREX.r3.1HG0011970	TPM	0	0	0	0	0	0	0	0	0	0	0	0	0	0	0	0	0	0	0	0	0
HORVU.MOREX.r3.1HG0012000	TPM	0	0	0	0	0	0	0	0	0.16	0	0	0	0	0.16	0.15	0	0	0.25	0	0	0
HORVU.MOREX.r3.1HG0012010	TPM	0	0	0	0	0	0	0	0	0	0	0	0	0	0	0	0	0	0	0	0	0
HORVU.MOREX.r3.1HG0012020	TPM	5.54	5.57	4.37	8.99	5.63	6.69	13.03	13.53	12.87	11.48	15.55	15.16	20.02	19.94	21.16	21.19	20.09	21.05	2.15	3.93	3.3
HORVU.MOREX.r3.1HG0012030	TPM	0	0	0	0	0	0	0	0	0	0	0	0	0	0	0	0	0	0	0	0	0
HORVU.MOREX.r3.1HG0012040	TPM	0	0	0	0	0	0	0	0	0	0	0	0	0	0.1	0	0	0	0	0	0	0
HORVU.MOREX.r3.1HG0012100	TPM	13.56	11.9	12.55	13.77	13.4	13.32	14.12	11.76	11.9	13.69	16.05	15.79	16.09	15.14	15.16	15.05	15.51	18.07	4.59	3.84	5.8
HORVU.MOREX.r3.1HG0012110	TPM	2.89	2.24	2.63	10.7	10.72	8.01	4.14	3.62	4.63	3.82	2.17	3.13	3.46	2.48	2.29	2.14	1.75	2.57	0.58	3.64	2.82
HORVU.MOREX.r3.1HG0012140	TPM	0	0	0	0	0	0	0	0	0	0	0.39	0	0	0	0	0	0	0	0	0	0.25
HORVU.MOREX.r3.1HG0012160	TPM	2.43	1.35	1.49	6.87	5.21	5.59	0.9	0.82	0.78	0.94	0.54	0.59	0.45	0.63	0.46	0.21	0.22	0.34	0.01	0.04	6.86
HORVU.MOREX.r3.1HG0012170	TPM	3.56	2.31	3.24	3.86	3.29	3.85	3.41	2.85	3.08	2.85	2.95	2.82	2.98	2.44	2.42	2.86	2.58	2.18	0.36	0.93	1.3
HORVU.MOREX.r3.1HG0012180	TPM	0	0	0	0	0.06	0	0	0	0.02	0	0.02	0.04	0	0.08	0.09	0.04	0.09	0.03	0	0	2.71
HORVU.MOREX.r3.1HG0012250	TPM	114.8	69.19	78.72	79.11	86.75	91.21	26.56	31.26	33.25	34.02	38.73	44.92	19.38	19.38	25.36	18.28	26.1	26.88	28.44	30.54	31.61
HORVU.MOREX.r3.1HG0012290	TPM	0	0.07	0	0.03	0	0	0	0	0	0.02	0	0	0	0	0	0	0	0	0	0	0
HORVU.MOREX.r3.1HG0012300	TPM	0	0	0	0	0	0	0	0	0	0	0	0	0	0	0	0.15	0	0	0	0	0
HORVU.MOREX.r3.1HG0012310	TPM	1.61	1.57	1.74	2.36	1.65	2.32	2.87	2.73	3.7	2.55	2.74	2.84	2.57	2.81	3.37	2.6	1.99	2.57	0.26	0.7	0
HORVU.MOREX.r3.1HG0012320	TPM	0	0	0	0	0	0	0	0	0	0	0	0	0	0	0	0	0	0	0.09	0	0
HORVU.MOREX.r3.1HG0012330	TPM	23.8	19.08	17.25	38.59	31.53	31.88	25.13	26.93	24.41	21.87	21.81	24.14	19.97	20.35	21.76	17.87	16.88	16.97	3.2	6.82	6.63
HORVU.MOREX.r3.1HG0012340	TPM	2.7	5.06	2.92	0.98	1.76	1.91	0.71	0.68	1.04	0.42	0.14	0.19	0.35	0.49	0.49	0.34	0.46	0.18	0.19	0.14	0
HORVU.MOREX.r3.1HG0012370	TPM	0	0	0	0	0	0	0	0	0	0	0	0	0	0	0	0	0	0	0	0	0
HORVU.MOREX.r3.1HG0012390	TPM	0	0	0	23.86	0	0	0	0	0	0	0	0	0	0	0	0	0	0	7.93	0	19.13
HORVU.MOREX.r3.1HG0012400	TPM	258.27	31.34	43.72	74.15	139.43	87.36	22.25	24.27	18.75	81.79	58.6	21.39	60.31	68.17	54.79	72.35	72.33	60.58	25.02	139.23	38.56
HORVU.MOREX.r3.1HG0012410	TPM	112.85	18.77	27.64	27.11	46.79	50.01	9.98	15	11.29	31.71	27.13	10.73	24.57	25.71	14.99	42.1	34.11	12.67	4.18	59.11	19.18
HORVU.MOREX.r3.1HG0012420	TPM	112.85	18.77	27.64	27.11	46.79	50.01	9.98	15	11.29	31.71	27.13	10.73	24.57	25.71	14.99	42.1	34.11	12.67	4.18	59.11	19.18
HORVU.MOREX.r3.1HG0012430	TPM	112.85	18.77	27.64	27.11	46.79	50.01	9.98	15	11.29	31.71	27.13	10.73	24.57	25.71	14.99	42.1	34.11	12.67	4.18	59.11	19.18
HORVU.MOREX.r3.1HG0012440	TPM	0	0	0	0	0	0	0	0.01	0	0	0	0.02	0.02	0	0	0	0	0	0	0	0
HORVU.MOREX.r3.1HG0012480	TPM	5.94	10.62	8.19	3.79	2.08	2.01	66.34	65.94	40.26	122.63	97.8	128.68	120.34	167.3	103.89	164.64	183.56	137.45	12.5	34.42	52.9
HORVU.MOREX.r3.1HG0012490	TPM	5.03	1.62	0.92	17.97	10.2	14.83	11.85	13.49	6.4	31.09	27.04	21.28	32.14	19.55	23.45	34.56	15.44	23.44	0.53	14.24	0
HORVU.MOREX.r3.1HG0012520	TPM	0.53	0	0	1.34	0	2.08	6.59	6.18	8.83	10.71	10.58	2.78	19.17	9.65	7.24	10.59	7.02	9.67	0	0.56	3.95
HORVU.MOREX.r3.1HG0012530	TPM	0	0	0	0	0	0	0	0	0	0	0	0	0	0	0	0	0	0	0	0	0
HORVU.MOREX.r3.1HG0012540	TPM	0	0	0	0	0	0	0	0	0	0	0	0	0	0	0	0	0	0	0	0	0
HORVU.MOREX.r3.1HG0012570	TPM	373.11	138.44	165.37	76.84	116.63	93.99	87.63	112.77	61.33	66.65	68.2	36.13	39.76	35.14	46.42	32.4	27.69	19.91	389.94	822.3	687.66
HORVU.MOREX.r3.1HG0012580	TPM	515.99	208.19	236.18	94.85	161.58	141.41	114.94	140	80.04	78.66	90.23	50.5	59.77	37.25	57.1	40.47	37.24	36.35	606.64	1140.11	944.39
HORVU.MOREX.r3.1HG0012590	TPM	0	0	0	0	0	0	0	0	0	0	0	0	0	0	0	0	0	0	0	0	0
HORVU.MOREX.r3.1HG0012620	TPM	552.22	333.95	419.85	677.79	748.98	728.59	214.24	221.71	253.18	180.77	129.99	122.65	130.31	120.18	138.34	140.13	84.51	98.84	55.65	201.9	117.45
HORVU.MOREX.r3.1HG0012630	TPM	0.21	0.35	0.15	0.18	0.15	0.09	0.22	0.15	0.22	0.61	0.48	0.25	0.83	0.47	0.5	0.59	0.5	1.25	0.15	4.21	1.48
HORVU.MOREX.r3.1HG0012640	TPM	121.2	67.93	46.65	18.95	33.49	31.58	17.41	27.4	17.53	18.53	18.22	8.43	10.31	6	7.83	11.22	7.64	11.06	121.08	199.62	135.54
HORVU.MOREX.r3.1HG0012650	TPM	0.23	0.15	0	0.09	0	0.13	0.05	0	0.19	0.06	0.13	0.07	0	0.2	0.13	0.06	0.31	0.21	0	0	0
HORVU.MOREX.r3.1HG0012660	TPM	0.12	0	0.43	0.87	0.29	0.19	0.19	0	0.21	0.29	0.1	0.21	0.1	0.2	0	0.37	0.29	0.65	0.17	0	0
HORVU.MOREX.r3.1HG0012670	TPM	0.35	0.37	0.17	0.39	0.24	0.36	0.32	0.21	0.11	0.25	0.15	0.3	0.29	0.34	0.2	0.26	0.37	0.44	0.02	0	0
HORVU.MOREX.r3.1HG0012680	TPM	0	0	0	0	0	0	0	0	0	0	0	0	0	0	0	0	0	0	0	0	0
HORVU.MOREX.r3.1HG0012720	TPM	0	0	0	0	0	0	0	0	0	0	0	0	0	0	0	0	0	0	0	0	0.77
HORVU.MOREX.r3.1HG0012730	TPM	1.6	2.5	2.06	2.04	2.58	6.53	0.83	0.74	1.07	0.95	0.25	0.36	1.57	1.07	0.46	2.42	0.9	1.03	0.16	0.87	1.05
HORVU.MOREX.r3.1HG0012760	TPM	0	0	0	0	0	0	0	0	0	0	0	0	0	0	0	0	0	0	0	0	0
HORVU.MOREX.r3.1HG0012840	TPM	0.56	0.3	0.34	0.74	0.6	0.54	0.39	0.32	0.45	0.2	0.25	0.43	0.3	0.32	0.51	0.27	0.34	0.36	0.03	0.07	0
HORVU.MOREX.r3.1HG0012850	TPM	0	0	0	0	0	0	0	0	0	0	0	0	0	0	0	0	0	0	0	0	0
HORVU.MOREX.r3.1HG0012860	TPM	0	0	0	0	0.03	0	0	0	0	0	0	0	0	0	0	0	0	0	0	0	0
HORVU.MOREX.r3.1HG0012870	TPM	0.04	0.04	0	0	0	0	0.04	0	0	0	0	0	0	0	0	0	0	0	0	0	0
HORVU.MOREX.r3.1HG0012880	TPM	0	0	0	0	0	0	0	0	0	0	0	0	0	0.03	0	0	0	0	0	0	0
HORVU.MOREX.r3.1HG0012890	TPM	0	0	0	0	0	0	0	0	0	0	0	0	0	0	0	0	0	0	0	0	0
HORVU.MOREX.r3.1HG0012950	TPM	0	0	0	0	0	0	0	0	0	0	0	0	0	0	0	0	0	0	0	0	0
HORVU.MOREX.r3.1HG0012990	TPM	0.26	0.25	0.25	0.13	0.26	0.34	0.04	0.04	0	0.04	0.09	0	0.14	0.18	0	0.17	0.04	0	0	0	0
HORVU.MOREX.r3.1HG0013000	TPM	8.61	5.53	7.93	18.55	13.63	15.12	18.59	16.59	18.99	20.1	20.46	23.62	19.42	20.3	19.49	17.35	20.77	25.56	8.55	9.94	11.75
HORVU.MOREX.r3.1HG0013020	TPM	1.92	2.37	2.29	2.63	1.97	2.15	2.82	2.34	3.15	2.64	3.87	3.66	4.28	3.5	4.45	5.44	4.24	3.38	2.54	2.41	3.31
HORVU.MOREX.r3.1HG0013030	TPM	0	0	0	0	0	0	0	0	0	0	0	0	0	0	0	0	0	0	0	0	0
HORVU.MOREX.r3.1HG0013050	TPM	226.93	226.14	243.56	178.95	178.44	155.39	149.12	157.29	167.64	135.09	154.48	140.68	133.27	138.08	147.96	137.77	127.22	172.73	123.92	169.54	162.31
HORVU.MOREX.r3.1HG0013070	TPM	0.06	0.23	0.11	0.23	0.3	0.24	0.2	0.39	0.48	0.48	0.44	0.21	0.27	0.57	0.19	0.23	0.59	0.57	0.13	0.25	0.13
HORVU.MOREX.r3.1HG0013140	TPM	0	0	0	0	0	0	0.17	0	0	0	0.18	0.75	0.19	0	0.17	0	0.18	0.29	0	0	0
HORVU.MOREX.r3.1HG0013150	TPM	0	0	0	0	0	0	0	0	0	0	0	0	0	0	0	0	0	0	0	0	0
HORVU.MOREX.r3.1HG0013170	TPM	0	0	0	0	0	0.08	0	0	0	0	0	0	0	0	0	0	0	0	0	0	0
HORVU.MOREX.r3.1HG0013180	TPM	3.9	5.9	6	3.98	4.89	8.34	8.85	8.55	7	15.55	8.82	11.25	14.11	16.72	14.48	24.92	17.7	15.55	20.91	15.49	16.16
HORVU.MOREX.r3.1HG0013220	TPM	59.7	74.2	70.34	39.52	52.58	49.07	36.48	39.13	35.52	47.6	44.9	43.05	43.23	46.91	44.44	53.18	58.82	49.28	87.38	98.19	93.08
HORVU.MOREX.r3.1HG0013230	TPM	0	0	0	0	0	0	0	0	0	0	0	0	0	0	0	0	0	0	0	0	0
HORVU.MOREX.r3.1HG0013240	TPM	0	0	0	0	0	0	0	0	0	0	0	0	0	0	0	0	0	0	0	0	0
HORVU.MOREX.r3.1HG0013250	TPM	0	0	0	0	0	0	0	0	0	0	0	0	0	0	0	0	0	0	0	0	0
HORVU.MOREX.r3.1HG0013270	TPM	19.79	31.9	29.53	3.57	6.86	2.8	32.15	43.49	36.64	72.1	75.02	60.14	62.63	54.33	56.87	52.72	79.76	48.63	361.42	255.88	270.26
HORVU.MOREX.r3.1HG0013280	TPM	0.11	0.11	0.11	0	0	0.09	0	0.09	0	0.09	0	0	0	0.19	0	0.26	0	0	0	0	0.12
HORVU.MOREX.r3.1HG0013300	TPM	34.47	37.88	36.81	30.79	36.95	27.96	24.78	23.16	25.06	23.9	28.21	27.44	32.02	36.4	32.01	35.16	35.31	42.34	15.98	18.96	22.62
HORVU.MOREX.r3.1HG0013310	TPM	0	0.48	0	0	0	0	0.11	0.11	0.8	0.6	0	0.11	0.22	0.21	0.35	0	0.11	0.18	0.64	0.52	0
HORVU.MOREX.r3.1HG0013330	TPM	0.26	0.28	0.26	0.34	0	0	0	0	0	0.48	0	0	0.02	0.82	0	0	0	0	0	0.32	0.29
HORVU.MOREX.r3.1HG0013340	TPM	0	0	0	0	0	0	0	0	0	0	0	0	0	0	0	0	0	0	0	0	0
HORVU.MOREX.r3.1HG0013350	TPM	0	0	0	0	0	0	0	0	0	0	0	0	0	0	0	0	0	0	0	0	0
HORVU.MOREX.r3.1HG0013380	TPM	0	0	0	0	0	0	0	0	0	0	0	0	0	0	0	0	0	0	0	0	0
HORVU.MOREX.r3.1HG0013400	TPM	0.26	0	0	0	0	0	0	0	0	0.21	0	0	0	0	0	0	0	0	0	0	0.28
HORVU.MOREX.r3.1HG0013440	TPM	0	0	0	0	0	0	0	0	0	0	0	0	0	0	0	0	0	0	0	0	0
HORVU.MOREX.r3.1HG0013450	TPM	0	0	0	0	0	0	0	0	0	0	0	0	0	0	0	0	0	0	0	0	0
HORVU.MOREX.r3.1HG0013470	TPM	0	0	0	0	0	0	0	0	0	0	0	0	0	0	0	0	0	0	0	0	0
HORVU.MOREX.r3.1HG0013480	TPM	0	0	0	0	0	0	0	0	0	0	0	0	0.08	0.1	0.07	0	0	0.12	0.16	0	0
HORVU.MOREX.r3.1HG0013490	TPM	0.12	0	0	0	0	0	0	0	0.32	0.69	0	0	0	0.38	1.45	0	0.3	0	0.48	1.93	0.39
HORVU.MOREX.r3.1HG0013510	TPM	0	0	0	0	0	0	0	0	0	0	0	0	0.08	0.1	0.07	0	0	0.12	0.16	0	0
HORVU.MOREX.r3.1HG0013540	TPM	0	0	0	0	0	0	0	0	0	0	0	0	0.08	0.1	0.07	0	0	0.12	0.16	0	0
HORVU.MOREX.r3.1HG0013570	TPM	0	0	0	0	0	0	0	0	0	0	0	0	0	0.35	0	0	0	0	0	0	0
HORVU.MOREX.r3.1HG0013590	TPM	0	0	0	0	0	0	0	0	0	0	0	0	0	0.23	0	0	0	0	0	0	0
HORVU.MOREX.r3.1HG0013650	TPM	0	0	0	0	0	0	0	0	0	0	0	0	0	0	0	0	0	0	0	0	0
HORVU.MOREX.r3.1HG0013690	TPM	19.5	18.98	20.22	15.93	15.99	16.64	12.92	12.29	11.61	12.7	13.8	14.49	13.82	15.58	13.63	13.26	13.49	20.49	4.42	5.75	6.29
HORVU.MOREX.r3.1HG0013700	TPM	16.19	15.52	17.26	16.17	18.54	21.18	17.46	18.84	17.16	17.24	22.5	23.07	23.16	25.46	21.1	28.86	24.16	25.41	12.16	15.2	15.63
HORVU.MOREX.r3.1HG0013800	TPM	55.85	41.06	43.05	43.13	46.37	39.03	25	22.21	23.67	17.23	16.05	18.37	19.24	17.45	18.03	16.42	17.26	13.29	10.97	18.18	15.87
HORVU.MOREX.r3.1HG0013820	TPM	59.05	41.02	43.95	53.77	55.28	61.41	36.12	35.36	37.41	27.91	26.31	30.11	30.29	29.82	31.3	26.83	29.06	19.92	14.57	20.1	15.46
HORVU.MOREX.r3.1HG0013910	TPM	0	0	0	0	0	0	0	0	0	0	0	0	0	0	0	0	0	0	0	0	0
HORVU.MOREX.r3.1HG0013920	TPM	0	0.13	0	0.25	0.17	0.11	0	0.11	0.12	0.05	0	0.06	0	0.06	0	0.05	0.06	0	0.05	0.14	0.14
HORVU.MOREX.r3.1HG0013940	TPM	0	0	0	0	0	0	0	0	0	0	0	0	0	0	0	0	0	0	0	0	0
HORVU.MOREX.r3.1HG0013960	TPM	0	0	0	0	0	0	0	0	0	0	0	0	0	0	0	0	0	0	0	0	0
HORVU.MOREX.r3.1HG0013970	TPM	1.86	0	0.68	1.19	0.98	0	0.58	0.19	0.42	0.38	0.2	0	0.42	0.2	0.96	0	0.58	0	1.01	0	0.51
HORVU.MOREX.r3.1HG0013980	TPM	5.53	1.39	1.22	0	0.6	0	0.89	0.15	0.96	0.15	0.15	0	0.96	0.31	1.02	0	0.74	0	1.67	1.72	2.13
HORVU.MOREX.r3.1HG0014090	TPM	0	0	0	0	0	0	0	0	0	0	0	0	0	0	0	0	0	0	0	0	0
HORVU.MOREX.r3.1HG0014100	TPM	6.97	8.57	8.09	8.37	6.69	7.02	4.41	4.11	4.81	4.2	3.38	3.6	3.42	3.85	3.49	3.42	4	4.16	1.68	4.58	3.02
HORVU.MOREX.r3.1HG0014120	TPM	1.49	3.78	1.7	0.82	2.21	3.87	1.21	1.13	1.25	1.58	1.19	1.85	1.92	2.3	1.72	2.09	2.34	1.34	1.95	3.7	2.16
HORVU.MOREX.r3.1HG0014190	TPM	20.37	30	23.34	36.37	19.03	29.12	8.02	6.77	9.66	16.6	9.14	11.15	12.07	12.02	10.89	8.51	15.09	20.55	5.81	6.38	8.32
HORVU.MOREX.r3.1HG0014220	TPM	3.23	4.68	3.56	4.02	2.74	2.04	4.95	4.58	3.77	2.68	2.62	2.61	2.61	3.19	2.49	2.22	3.26	3.45	2.94	3.14	2.88
HORVU.MOREX.r3.1HG0014240	TPM	0	0	0	0	0	0	0	0	0	0	0	0	0	0	0	0	0	0	0	0	0
HORVU.MOREX.r3.1HG0014260	TPM	0	0	0	0	0	0	0	0	0	0	0	0	0	0	0	0	0	0	0	0	0
HORVU.MOREX.r3.1HG0014320	TPM	8.77	8.8	9.06	8.69	7.92	7.72	5.79	5.96	6.11	5	5.9	6.42	5.04	5	5.99	5.12	4.74	4.97	1.19	1.89	1.62
HORVU.MOREX.r3.1HG0014340	TPM	90.88	92.02	97.86	57.69	59.87	64.61	38.92	35.02	43.44	39.44	39.27	46.16	45.24	53.26	48.72	39.95	46.39	71.55	17.88	21.89	28.64
HORVU.MOREX.r3.1HG0014350	TPM	2.23	2.38	1.78	1.87	2.56	4.61	1.21	1.9	1.57	1.57	1.12	2.05	1.28	2.23	1.7	2.84	1.46	1.47	0.91	1.04	0.75
HORVU.MOREX.r3.1HG0014380	TPM	0	0	0	0	0.44	0.85	0.11	0.22	0.12	0	0.22	0.23	0.24	0.34	0.32	0.41	0	0	0	0	0.43
HORVU.MOREX.r3.1HG0014400	TPM	11.1	10.8	6.68	3.8	6.23	4.45	4.08	5.78	4.09	3.03	3.39	2.66	1.99	1.78	1.73	2.1	1.17	2.19	11.62	34.94	25.84
HORVU.MOREX.r3.1HG0014410	TPM	2.03	3.09	2.96	2.13	4.06	6.39	2.06	2.13	1.64	1.31	1.23	1.3	1.66	1.39	2.43	1.21	1.33	0.6	1.33	0.62	0.55
HORVU.MOREX.r3.1HG0014430	TPM	16.92	12.54	13.31	20.38	16.95	16.18	20.65	21.03	23.17	19.99	22.96	22.4	19.1	21.25	21.19	16	18.57	21.25	8.91	13.06	10.4
HORVU.MOREX.r3.1HG0014440	TPM	3.78	5.24	4.44	12.94	9.27	10.19	10.34	11.33	13.32	14.5	14.14	14.33	16.55	17.97	17.51	15.36	15.56	20.68	0.44	0.91	1.4
HORVU.MOREX.r3.1HG0014490	TPM	1.01	0.53	0.72	1.48	1.1	0.76	0.9	0.89	0.89	0.71	0.62	1.07	0.78	0.65	0.85	0.59	0.7	0.93	0.07	0.24	0.16
HORVU.MOREX.r3.1HG0014500	TPM	0	0	0	0.01	0	0	0	0	0	0	0	0	0.06	0	0	0	0	0	0	0	0
HORVU.MOREX.r3.1HG0014520	TPM	0	0.04	0	0	0	0.03	0	0	0	0	0	0.03	0	0	0	0	0	2.73	0.03	0	0
HORVU.MOREX.r3.1HG0014530	TPM	644.11	869.35	1044.75	622.2	820.47	688.6	514.92	520.25	623.91	451.36	470.65	471.85	395.69	400.73	397.42	363.43	369.01	467.07	378.87	474.65	514.51
HORVU.MOREX.r3.1HG0014540	TPM	0	0	0.03	0	0	0	0	0	0	0	0	0	0	0	0	0	0	0	0	0	0
HORVU.MOREX.r3.1HG0014550	TPM	0	0	0	0	0	0	0	0	0	0	0	0	0	0	0	0	0	0	0	0	0
HORVU.MOREX.r3.1HG0014560	TPM	4.9	10.24	9.52	4.05	6.31	9.14	3.2	3.6	5	3.52	2.05	2.97	3.24	3.57	5.76	3.35	3.46	2.59	3.3	4.13	4.79
HORVU.MOREX.r3.1HG0014570	TPM	29.74	9.21	7.19	14.01	11.86	0.04	4.51	4.3	16.12	8.96	5.06	0.08	9.47	5.99	13.41	0	4.57	6.39	19.54	9.71	22.66
HORVU.MOREX.r3.1HG0014580	TPM	7.39	9.11	6.84	4.42	3.54	4.21	8.21	9.02	6.93	12.62	11.7	14.8	12.07	15.28	11.11	12.76	15.28	20.61	4.02	11.54	8.49
HORVU.MOREX.r3.1HG0014590	TPM	0.37	0.54	0.47	0.7	0.51	1.04	0.81	0.97	0.82	2.2	3.21	2.96	1.65	1.7	1.25	2.76	4.07	2.29	4.52	3.46	2.71
HORVU.MOREX.r3.1HG0014620	TPM	110.17	92.17	114.26	87.12	79.12	59.99	54.77	49.23	52.32	44.44	42.48	59.48	42.86	53.08	48.22	43.51	45.08	65.83	11.66	18.04	11.31
HORVU.MOREX.r3.1HG0014640	TPM	0.81	0.66	0.42	0.7	0.96	0.71	0.64	0.74	0.82	0.56	0.68	0.67	0.65	0.63	0.64	0.48	0.44	0.62	0.28	0.46	0.19
HORVU.MOREX.r3.1HG0014650	TPM	0.96	0.99	1.06	1.31	0.97	0.92	0.92	0.86	0.64	0.61	0.6	0.87	0.64	0.71	0.55	0.49	0.62	0.86	0.25	0.74	0.7
HORVU.MOREX.r3.1HG0014660	TPM	3.19	3.94	3.74	2.05	1.35	1.55	1.58	1.49	1.43	1.28	1.08	1.31	1.96	1.53	1.62	1.24	1.34	1.96	0.61	1.59	1.21
HORVU.MOREX.r3.1HG0014680	TPM	1.55	3.84	1.35	6.74	3.9	6.01	4.24	3.77	3.84	4.17	2.8	3.29	2.86	3.55	3.3	2.76	3.46	2.68	0.36	1.35	1.73
HORVU.MOREX.r3.1HG0014690	TPM	49.43	40.13	43.2	80.25	75.03	69.4	67.63	67.78	65.76	61.17	61.44	59.5	56.66	51.54	55.07	57.38	52.92	44.97	46.72	65.53	44.8
HORVU.MOREX.r3.1HG0014700	TPM	0	0	0	0	0	0	0	0	0	0	0	0	0	0	0	0	0	0	0	0	0
HORVU.MOREX.r3.1HG0014710	TPM	0.07	0	0	0	0	0	0	0	0.03	0	0	0	0	0	0	0	0	0	0	0	0
HORVU.MOREX.r3.1HG0014730	TPM	0	0	0.09	0.11	0	0.14	0.22	0.58	0.08	0.29	0.37	0.23	0.39	0.38	0.14	0.49	0.22	0.12	0.5	0.19	0
HORVU.MOREX.r3.1HG0014740	TPM	195.25	252.64	240.5	130.51	131.68	107.46	68.01	64.35	75.18	75.03	69.81	75.66	66.06	68.24	67.54	68.98	65.52	79.45	31.84	56.06	67.58
HORVU.MOREX.r3.1HG0014790	TPM	14.81	20.54	23.08	6.75	13.14	13.56	0.97	0.62	2.57	1.31	0.97	1.87	1.05	1.48	1.04	1.6	1.06	2.06	1.68	0.68	1.72
HORVU.MOREX.r3.1HG0014800	TPM	0.38	0.64	0	1.56	1.58	3.06	1.48	1.73	1.27	1.24	0.87	1.67	0.59	1.07	0.7	0.52	1.02	4.97	0.14	0.3	0.41
HORVU.MOREX.r3.1HG0014850	TPM	0	0	0	0	0	0	0	0	0	0	0	0	0	0	0	0	0	0	0	0	0
HORVU.MOREX.r3.1HG0014890	TPM	1.72	1.29	1.58	0.65	0.94	1.23	0.93	0.51	1.1	0.83	0.85	0.72	1.19	0.71	0.75	0.73	0.68	0.56	1.1	0.54	1.76
HORVU.MOREX.r3.1HG0014910	TPM	0	0	0	0	0	0	0	0	0	0	0	0	0.17	0	0	0	0	0	0	0	0
HORVU.MOREX.r3.1HG0014930	TPM	0	0	0	0	0	0	0	0	0	0	0	0	0	0	0	0	0	0	0	0	0.18
HORVU.MOREX.r3.1HG0015000	TPM	0	0	0	0	0	0	0	0	0	0	0	0	0	0	0	0	0	0	0	0	0
HORVU.MOREX.r3.1HG0015080	TPM	0	0	0.01	0	0	0	0	0	0	0	0	0	0	0	0	0	0	0	0.08	0	0
HORVU.MOREX.r3.1HG0015090	TPM	0	0	0	0	0	0	0	0	0	0	0	0	0	0	0	0	0	0	0	0	0
HORVU.MOREX.r3.1HG0015110	TPM	3.98	3.96	5.63	7.03	9.61	7.69	9.86	10.1	12.24	12.21	15.87	15.25	19.64	18.79	18.39	17.89	15.56	19.34	5.59	5.11	8.69
HORVU.MOREX.r3.1HG0015120	TPM	0	0	0	0	0	0	0	0	0	0	0	0	0	0	0	0	0	0	0	0	0
HORVU.MOREX.r3.1HG0015130	TPM	103.2	101.44	111.23	116.16	111.23	129.04	102.24	102.84	124.67	91.66	83.41	82.54	78.4	80.17	88.42	65.2	73.74	86.92	35.47	30.72	54.39
HORVU.MOREX.r3.1HG0015170	TPM	101.89	87.6	96.82	98.65	102.59	89.53	91.29	86.38	96.85	84.38	84.71	87.06	79.53	78.64	81.21	75.91	73.04	98.24	52.64	59.27	63.09
HORVU.MOREX.r3.1HG0015180	TPM	0.07	0	0	0	0.03	0	0	0	0	0	0.03	0	0	0	0	0	0	0	0	0.14	0
HORVU.MOREX.r3.1HG0015190	TPM	0	0	0	0	0.03	0	0	0	0	0	0	0	0	0	0	0	0	0	0	0	0
HORVU.MOREX.r3.1HG0015240	TPM	0.23	0.11	0.17	0.67	0.39	0.61	0.43	0.63	0.52	1.19	1.02	0.82	1.15	0.66	0.48	1.11	1.26	0.81	0.08	0.37	0.38
HORVU.MOREX.r3.1HG0015250	TPM	40.72	56.41	43.26	47.06	48.98	64.82	41.11	34.13	26.37	26.93	21.1	20.15	48.21	39.27	31.84	42.61	43.84	30.71	19.7	27.47	23.68
HORVU.MOREX.r3.1HG0015270	TPM	84.64	71.83	88.38	81.95	95.08	65.11	59.24	64.09	61.45	47.93	52.01	46.23	40.49	39.39	43.82	37.73	39.2	49.44	39.01	64.35	56.43
HORVU.MOREX.r3.1HG0015290	TPM	0	0	0	0	0	0	0	0	0	0	0	0	0	0	0	0	0	0	0	0	0
HORVU.MOREX.r3.1HG0015330	TPM	0	0	0	0.16	0.07	0	0	0	0	0	0.03	0	0.04	0	0.03	0	0	0	0	0	0
HORVU.MOREX.r3.1HG0015360	TPM	0	0	0	0	0	0	0	0	0	0	0	0	0	0	0	0	0	0	0	0	0
HORVU.MOREX.r3.1HG0015390	TPM	0	0	0	0.22	0.07	0.28	0.56	0.57	0.53	0.49	0.85	0.52	1.37	2	0.56	2.63	1.06	1.06	0	0.09	0
HORVU.MOREX.r3.1HG0015420	TPM	1.56	4.57	3.55	4.32	1.75	1.06	1.95	0.65	1.41	2.36	1.75	0.92	2.35	2.73	1.71	0.41	2.18	0.72	0.94	0.28	1.7
HORVU.MOREX.r3.1HG0015430	TPM	2.32	3.51	2.22	0.52	1.45	2.36	0.72	0.61	0.33	0.79	0.23	0.12	0.61	0.75	0.86	0.61	0.46	0.38	0.2	0.88	0.94
HORVU.MOREX.r3.1HG0015460	TPM	0.11	0.22	0.45	0.15	0.39	0.09	0	0	0	0	0	0	0	0	0	0	0	0	0.41	0	0
HORVU.MOREX.r3.1HG0015470	TPM	11.94	13.22	16.89	15.44	27.47	33.79	4.03	5.14	11.19	7.67	2.24	2.19	4.68	3.48	6.53	4.52	2.71	4.19	60.01	20.71	25.06
HORVU.MOREX.r3.1HG0015480	TPM	26.49	30.87	31.07	21.53	21.49	19.64	18.09	18.67	17.98	15.49	17.41	16.64	19.52	18.6	16.9	20.76	17.3	20.09	29.39	31.79	28.79
HORVU.MOREX.r3.1HG0015510	TPM	0	0	0	0	0	0	0	0	0	0	0	0	0	0	0	0	0	0	0	0	0
HORVU.MOREX.r3.1HG0015520	TPM	6.49	4.75	7.47	12.82	12.35	9.18	14.46	11.24	15.32	19.83	12.92	15.84	11.28	17.2	10.96	13.65	14.8	15.12	1.12	5.58	3.32
HORVU.MOREX.r3.1HG0015530	TPM	0	0	0	0	0	0	0	0	0	0	0	0	0	0	0	0	0	0	0	0	0
HORVU.MOREX.r3.1HG0015610	TPM	0	0	0	0	0	0	0	0	0	0	0	0	0	0	0	0	0	0	0	0	0
HORVU.MOREX.r3.1HG0015620	TPM	0	0	0	0	0	0	0	0	0	0.06	0	0	0	0	0	0	0	0	0	0	0
HORVU.MOREX.r3.1HG0015640	TPM	0	0	0	0	0	0	0	0	0	0	0	0	0	0	0	0	0	0	0	0	0
HORVU.MOREX.r3.1HG0015670	TPM	0	0	0	0	0	0	0	0	0	0	0	0	0	0.3	0	0	0	0	0	0	0
HORVU.MOREX.r3.1HG0015680	TPM	0.03	0.03	0	0.49	0.4	0.65	1.3	1.02	1.18	1.79	1.53	2.89	4.53	7.3	4.92	2.6	5	8.2	0	0	0
HORVU.MOREX.r3.1HG0015720	TPM	1.39	1.6	1.21	2.87	1.91	5.9	3.04	2.26	1.43	1.91	1.14	1.38	3.52	3.05	2.8	2.25	3.54	2.41	0.97	1.54	0.8
HORVU.MOREX.r3.1HG0015740	TPM	0	0	0	0	0	0	0	0	0	0	0	0	0	0	0.05	0	0	0	0	0.25	0
HORVU.MOREX.r3.1HG0015750	TPM	0.17	0.1	0.1	2.19	1.38	2.17	2.53	1.74	2.1	1.47	1.92	1.85	1.08	1.05	1.38	1.17	1.06	0.91	0.05	0.15	0.07
HORVU.MOREX.r3.1HG0015760	TPM	20	13.08	22.03	23.32	22.17	19.13	14.8	14.26	15.22	13.38	12.35	14.67	14.47	14.8	15.14	14.04	13.41	14.49	2.37	2.83	3.12
HORVU.MOREX.r3.1HG0015780	TPM	0	0	0	0	0	0	0	0	0	0	0	0	0	0	0	0	0	0	0.17	0	0
HORVU.MOREX.r3.1HG0015790	TPM	0	0	0	0	0	0	0	0	0	0	0	0	0	0	0	0	0	0	0	0	0
HORVU.MOREX.r3.1HG0015890	TPM	16.04	16.31	18.76	12	12.95	11.18	9.57	8.9	9.63	10.29	9.49	10.74	9.95	11.15	11.53	9.49	11.42	13.99	3.2	5.1	4.24
HORVU.MOREX.r3.1HG0015960	TPM	0	0	0	0.02	0	0	0.02	0.02	0.03	0.02	0.03	0.03	0	0	0.02	0	0	0	0	0	0
HORVU.MOREX.r3.1HG0015990	TPM	0	0	0.16	0	0.14	0	0	0	0	0	0	0	0	0	0	0	0	0	0	0	0.18
HORVU.MOREX.r3.1HG0016030	TPM	6	2.67	4	14.37	13.33	14.34	10.82	11.86	14.02	12.73	14.54	17.02	18.48	17.83	21.84	14.22	17.56	16.67	2.73	9.69	28.23
HORVU.MOREX.r3.1HG0016050	TPM	0	0	0	0	0	0	0	0	0	0.1	0	0	0	0.1	0.1	0	0	0.16	0	0	0
HORVU.MOREX.r3.1HG0016090	TPM	42.25	39.76	45.32	38.1	34.65	31.13	29.09	27.08	31.04	27.43	30.35	31.26	28.08	29.15	30.95	25.09	28.68	36.13	12.72	20.73	25.17
HORVU.MOREX.r3.1HG0016100	TPM	0	0	0	0	0	0.04	0.04	0	0.04	0	0.04	0	0	0	0	0	0	0	0.1	0.05	0.05
HORVU.MOREX.r3.1HG0016110	TPM	113.1	112.21	122.8	78.75	83.41	70.07	67.5	64.85	79.14	86.69	91.5	84.43	81.47	79.07	82.31	90.42	90.57	100.4	65.27	88.33	109.52
HORVU.MOREX.r3.1HG0016120	TPM	0	0	0	0	0	0	0	0	0	0	0	0	0	0	0	0	0	0	0	0	0
HORVU.MOREX.r3.1HG0016130	TPM	0	0	0	0	0	0	0	0	0	0	0	0	0	0	0	0	0	0	0	0	0
HORVU.MOREX.r3.1HG0016150	TPM	0	0	0	0	0	0	0	0	0	0	0	0	0	0	0	0	0	0	0	0	0
HORVU.MOREX.r3.1HG0016160	TPM	0	0	0	0	0	0	0	0	0	0	0	0	0	0	0	0	0	0	0	0	0
HORVU.MOREX.r3.1HG0016170	TPM	0	0	0	0	0	0	0	0	0	0	0	0	0	0	0	0	0	0	0	0	0
HORVU.MOREX.r3.1HG0016190	TPM	0	0	0	0	0	0	0	0	0	0	0	0	0	0	0	0	0	0	0	0	0
HORVU.MOREX.r3.1HG0016200	TPM	59.65	46.62	46.26	97.44	77.35	93.8	81.88	82.05	85.72	86.83	81.02	85.21	73.58	77.41	80.56	72.23	72.97	56.46	50.43	73.23	75.33
HORVU.MOREX.r3.1HG0016210	TPM	0	0	0	0	0	0	0	0	0	0	0	0	0	0	0	0	0	0.12	0	0	0
HORVU.MOREX.r3.1HG0016240	TPM	0	0	0	0	0	0	0	0	0	0	0	0	0	0	0	0	0	0	0	0	0
HORVU.MOREX.r3.1HG0016260	TPM	1.03	1.78	1.8	1.14	1.7	3.87	0.26	1.18	0.69	0.85	0.61	0.67	0.97	2.48	1.03	2.19	2.14	0.41	0.94	1.11	0.48
HORVU.MOREX.r3.1HG0016290	TPM	0	0	0	0	0	0	0	0	0	0	0	0	0	0	0	0	0	0	0	0	0
HORVU.MOREX.r3.1HG0016310	TPM	201.64	247.98	203.96	111.64	159.49	142.67	48.27	46.13	44.29	54.24	33.57	48.25	58.15	53.77	45.91	66.91	47.99	42.41	74.85	94.95	67.22
HORVU.MOREX.r3.1HG0016340	TPM	0	0	0	0	0	0	0	0	0	0	0	0	0	0	0	0	0	0	0	0	0
HORVU.MOREX.r3.1HG0016360	TPM	0	0	0	0	0	0	0	0	0	0	0	0	0	0	0	0	0	0	0	0	0
HORVU.MOREX.r3.1HG0016370	TPM	20.06	12.68	13.93	22.3	17.45	24.24	14.67	15.54	13.71	12.94	9.55	12.06	9.3	10.59	11.01	10.33	9.4	6.52	8.64	15.78	10.67
HORVU.MOREX.r3.1HG0016410	TPM	18.78	10.86	13.72	28.46	25.07	22.14	20.56	17.63	21	17.19	15.22	17.29	16.07	17.9	17.67	15.88	15.32	19.06	11.42	13.8	13.35
HORVU.MOREX.r3.1HG0016450	TPM	5.65	5.43	6.02	4.1	5.81	5.19	1.93	2.75	4.16	3.07	2.83	3.69	2.04	2.56	2.66	1.32	3.37	3	1.9	1.54	2.86
HORVU.MOREX.r3.1HG0016480	TPM	1.5	1.86	2.26	1.32	0.99	1.09	2.06	1.98	1.96	2.23	3.12	2.45	2.44	2.2	2.2	2	3.28	2.19	1.61	1.65	3.05
HORVU.MOREX.r3.1HG0016510	TPM	0.24	0.12	0.08	0.55	0.89	0.99	0.26	0.07	0.21	0.16	0	0.07	0.11	0.17	0.1	0.03	0	0.16	0	0.08	0
HORVU.MOREX.r3.1HG0016530	TPM	0	0	0.1	0	0	0	0	0.09	0.09	0	0	0	0	0	0	0	0	0	0	0.08	0
HORVU.MOREX.r3.1HG0016550	TPM	0.29	0.04	0.36	0.16	0.73	0.61	0.17	0.07	0.15	0.24	0	0.04	0.04	0.04	0.24	0.1	0.07	0.12	0.09	0.4	0.32
HORVU.MOREX.r3.1HG0016580	TPM	0	0	0	0	0	0.08	0	0	0	0	0	0	0	0	0	0	0	0	0	0	0
HORVU.MOREX.r3.1HG0016590	TPM	1.87	0.98	1.5	0.6	1.18	2.11	0.22	0.39	0.36	0.44	0.5	0.71	0.3	0.35	0.33	0.37	0.45	0.37	0.67	3.08	3.34
HORVU.MOREX.r3.1HG0016620	TPM	0	0	0	0	0	0.17	0	0	0.19	0	0	0	0	0	0	0	0	0	0	0	0
HORVU.MOREX.r3.1HG0016660	TPM	0.22	0	0.32	1.53	1.33	1.64	0.72	0.87	0.79	0.36	0.32	0.39	0.34	0.38	0.81	0.26	0.41	0.38	0	0.06	0
HORVU.MOREX.r3.1HG0016680	TPM	0	0	0	0	0	0	0	0	0	0	0	0	0	0	0	0	0	0	0	0	0
HORVU.MOREX.r3.1HG0016710	TPM	0	0.13	0	10.97	1.65	3.05	19.85	15.21	21.19	18.61	25.28	20.16	19.51	23.08	19.36	15.59	21.99	12.21	0	0.35	0
HORVU.MOREX.r3.1HG0016730	TPM	9.08	9.7	8.79	5.11	5.78	5.13	4.54	5.29	4.79	5.31	6.11	4.61	4.95	4.93	5.58	5.4	4.24	5.92	4.89	7.05	7.97
HORVU.MOREX.r3.1HG0016740	TPM	96.1	115.47	105.12	89.45	72.95	77.91	57.28	54.03	58.25	55.15	55.19	57.28	51.13	53.99	53.49	50.12	52.83	59.8	30.47	62.43	52.28
HORVU.MOREX.r3.1HG0016760	TPM	26.14	23.7	21.24	22.7	22.61	21.4	18.92	19	20.34	19.56	21.28	20.19	22.34	20.17	21.97	22.52	23.09	18.31	17.4	20.54	19.22
HORVU.MOREX.r3.1HG0016770	TPM	1.18	1.15	0.86	1.17	0.91	0.74	0.7	0.95	0.62	1.24	1.07	1.21	0.65	0.91	0.8	0.68	0.87	0.86	0.38	1.44	0.71
HORVU.MOREX.r3.1HG0016790	TPM	45.03	46.92	43.38	65.46	43.45	56.53	68.88	63.33	68.8	67.85	74.68	84.56	78.97	71.21	83.15	74.3	65	87.05	5.61	9.7	7.92
HORVU.MOREX.r3.1HG0016810	TPM	28.18	21.05	25.95	45.53	39.67	37.89	39.11	34.4	35.32	35.08	38.33	39.91	33.26	33.5	36.15	34.32	33.32	33.5	11.39	21.73	15.73
HORVU.MOREX.r3.1HG0016820	TPM	8.21	5.96	6.73	5.68	5.55	7.58	4.7	3.7	3.77	4.01	3.45	4.35	5.1	4.58	4.78	4.2	4.26	2.6	1.96	2.94	2.86
HORVU.MOREX.r3.1HG0016840	TPM	0	0	0	0	0	0	0	0	0	0	0	0	0	0	0	0	0	0	0	0	0
HORVU.MOREX.r3.1HG0016850	TPM	5.22	4.87	5.29	4.46	5.24	4.84	3.7	3.22	3.44	3.1	2.55	2.84	4.16	3.27	3.89	3.9	4.63	2.91	2.08	4.31	3.65
HORVU.MOREX.r3.1HG0016910	TPM	1.82	1.46	1.46	5.55	2.87	2.88	5.27	4.39	4.86	5.21	4.58	5.47	4.41	4.88	5.27	4.07	4.68	4.98	0.7	1.27	0.87
HORVU.MOREX.r3.1HG0016940	TPM	2.42	1.4	2.36	14.71	7.69	8.95	18.51	16.12	18.71	13.06	19.4	18.76	19.05	16.48	19.53	16.58	14.92	16.26	0.47	1.72	0.74
HORVU.MOREX.r3.1HG0016950	TPM	36.23	22.79	28.81	34.33	32.63	28.92	33.32	30.87	32.61	24.24	26.41	31.56	27.42	28.02	28.8	18.46	23.87	29.02	8.49	12.89	11.09
HORVU.MOREX.r3.1HG0017020	TPM	0	0	0	0	0	0	0	0	0	0	0	0	0	0	0	0	0	0	0	0	0
HORVU.MOREX.r3.1HG0017040	TPM	0	0	0	0	0	0	0	0	0	0	0	0	0	0	0	0	0	0	0	0	0
HORVU.MOREX.r3.1HG0017050	TPM	0.07	0.2	0.07	0.09	0	0.38	0.34	0.17	0	0.5	0.06	0.24	0.91	0.47	0.17	0.91	0.62	0.47	0.05	0.07	0
HORVU.MOREX.r3.1HG0017060	TPM	0	0	0	0	0	0	0	0	0	0	0	0	0	0	0	0	0	0	0	0	0
HORVU.MOREX.r3.1HG0017070	TPM	15	17.23	16.61	34.93	20.1	26.31	37.97	36.43	41.21	35.1	37	33.69	40.95	37.13	43.33	40.19	35.79	43.72	34.59	32.72	32.03
HORVU.MOREX.r3.1HG0017080	TPM	24.35	25.16	28.35	21.12	18.28	17.32	15.73	14.06	19.84	17.34	21.2	18.29	21.65	18.34	19.88	19.94	20.77	21.73	21.17	21.93	26.3
HORVU.MOREX.r3.1HG0017090	TPM	0	0	0	0	0	0	0	0	0	0	0	0	0	0	0	0	0	0	0	0	0
HORVU.MOREX.r3.1HG0017100	TPM	0.12	0.06	0.06	0	0	0.05	0	0	0	0	0	0	0	0	0	0	0	0	0	0	0.06
HORVU.MOREX.r3.1HG0017110	TPM	219.47	214.6	210.1	160.79	182.21	146.77	97.88	86.37	123.19	105.43	98.51	103.93	110.64	104.62	106.51	106.71	101.53	124.73	60.25	83.93	100.44
HORVU.MOREX.r3.1HG0017130	TPM	3.57	3.9	4.18	3.1	2.93	2.03	1.91	1.81	1.89	2.2	2.36	2.35	2.32	2.12	2.04	2.36	2.07	2.4	1.37	1.35	2.4
HORVU.MOREX.r3.1HG0017140	TPM	0	0	0	0	0	0	0	0	0	0	0	0	0	0	0	0	0	0	0	0	0
HORVU.MOREX.r3.1HG0017150	TPM	1.89	1.47	1.98	1.66	1.56	0.72	1	0.96	1.38	1.09	0.86	1.25	1.25	1.29	0.99	1.29	1.3	1.48	0.34	0.57	0.55
HORVU.MOREX.r3.1HG0017240	TPM	24.23	28.63	25.76	22.21	24.69	31.28	29.49	34.21	30.58	39.03	37.54	32.82	38.62	34.12	37.18	36.19	46.85	38.17	63.57	56.33	67.66
HORVU.MOREX.r3.1HG0017250	TPM	76.01	96.96	86.94	41.75	39.36	37.83	21.81	19.45	25.04	22.5	24.06	25.54	26.09	29.21	27.06	27.53	27.33	36.74	32.26	34.42	45.8
HORVU.MOREX.r3.1HG0017280	TPM	1.32	1	1.66	24.52	16.98	37.84	21.48	22.9	20.75	11.72	12.58	11.46	11.91	14.24	14.07	12.69	9.04	13	3.29	2.24	2.5
HORVU.MOREX.r3.1HG0017310	TPM	22.42	12.91	15.76	14.1	23.87	21.46	9.44	11.59	8.74	7.01	6.02	7.21	9.18	7.98	8.14	8.73	7.09	4.85	5.95	9.69	2.97
HORVU.MOREX.r3.1HG0017340	TPM	2.36	0.23	0.23	1.81	0.2	0.19	0	0.39	0.43	0.39	0.59	0.21	0.21	0	0.58	0.19	0.39	1.63	0	0	0
HORVU.MOREX.r3.1HG0017350	TPM	0.05	0	0	4.99	4.19	8.89	0	0.14	0.05	0.09	0	0.05	0.1	0	0	0	0	0	0	0	0
HORVU.MOREX.r3.1HG0017370	TPM	0.09	0	0	7.66	5.15	11.52	0.49	0.65	0.49	0.49	0.08	0.12	0.25	0.04	0.08	0.11	0.08	0.06	0.03	0.05	0
HORVU.MOREX.r3.1HG0017410	TPM	17.32	7.61	7.56	9.69	13.06	20.06	3.16	2.11	2.86	3.21	1.44	0.83	1.62	2.02	1.55	1.02	0.93	1.61	0.43	1.29	0.37
HORVU.MOREX.r3.1HG0017420	TPM	0	0	0	0	0	0	0.53	1.17	0.29	0.84	0.27	0.28	0.34	0.39	0.73	0.41	0.43	0.44	0.05	0	0
HORVU.MOREX.r3.1HG0017430	TPM	0	0	0	0	0	0.12	0	0	0	0.04	0	0.04	0	0	0	0.04	0.04	0.07	0	0	0
HORVU.MOREX.r3.1HG0017440	TPM	16.93	19.72	18.56	17.44	14.84	13.84	19.2	18.37	21.11	17.18	20.96	20.52	19.83	16.8	19.29	16.42	16.05	17.55	8.28	8.76	9.06
HORVU.MOREX.r3.1HG0017460	TPM	0	0.1	0	0.13	0.04	0.2	0.45	0.37	0.4	0.36	0.08	0.09	0.13	0.21	0	0	0.41	0.34	0	0	0
HORVU.MOREX.r3.1HG0017480	TPM	2.9	0.06	0.19	0.51	2.71	1.71	1.15	0.77	0.71	0.49	0.22	0.47	1.37	1.61	1.62	1.36	0.66	0.37	0	0	0
HORVU.MOREX.r3.1HG0017520	TPM	0.05	0	0	0	0	0.04	0	0	0	0	0	0	0.05	0	0	0.08	0.04	0	0.29	0.05	0
HORVU.MOREX.r3.1HG0017530	TPM	0.05	0	0	0	0	0.04	0	0	0	0	0	0	0.05	0	0	0.08	0.04	0	0.29	0.05	0
HORVU.MOREX.r3.1HG0017560	TPM	0	0	0	0	0	0	0	0	0	0	0	0	0	0	0	0	0	0	0	0	0
HORVU.MOREX.r3.1HG0017580	TPM	0	0	0	0	0	0	0	0	0	0	0	0	0	0	0	0	0	0	0	0	0
HORVU.MOREX.r3.1HG0017620	TPM	0	0	0	0	0	0.08	2.04	1.15	0.47	2.3	4.24	3.26	2.69	2.56	4.43	2.11	2.49	1.65	0	0	0.26
HORVU.MOREX.r3.1HG0017630	TPM	0.63	0.78	0.94	0.64	0.42	0.71	0.9	0.56	0.94	0.45	0.46	0.78	0.45	0.66	0.69	0.6	0.63	1.42	0.72	0.09	0.91
HORVU.MOREX.r3.1HG0017660	TPM	0	0	0	0	0	0	0	0	0	0	0	0	0	0	0	0	0	0	0	0	0
HORVU.MOREX.r3.1HG0017670	TPM	0.13	0	0.13	0	0	0	0	0	0	0	0.22	0	0	0	0	0	0	0	0	0	0
HORVU.MOREX.r3.1HG0017680	TPM	0	0	0	0	0	0	0	0	0	0	0	0	0	0	0	0	0	0	0	0	0
HORVU.MOREX.r3.1HG0017700	TPM	0	0	0	0	0	0	0	0	0	0	0	0	0	0	0.04	0	0	0	0	0	0.06
HORVU.MOREX.r3.1HG0017720	TPM	289.41	171.12	157.95	1373.73	1033	1428.58	563.34	614.06	510.96	784.1	464.28	582.16	446.07	522.81	415.83	620.06	580.18	530.38	358.81	473.62	276.84
HORVU.MOREX.r3.1HG0017730	TPM	2.57	2.77	2.33	1.92	1.79	1.65	1.1	0.85	0.48	0.84	0.85	0.9	1.12	1.08	1.02	1.3	0.92	0.37	0.32	1.09	0.82
HORVU.MOREX.r3.1HG0017750	TPM	130.39	158.76	127.31	170.18	135.12	144.19	131.92	107.53	111.96	118.51	104.47	109.59	150.93	116.03	103.81	164.79	125.42	144.01	64.79	80.6	89.92
HORVU.MOREX.r3.1HG0017760	TPM	9.22	5.38	8.11	9.89	8.19	9.96	12.49	11.18	9.86	12.29	12.82	13.69	10.83	9.34	11.34	8.96	10.91	14.78	15.32	20.23	19.14
HORVU.MOREX.r3.1HG0017770	TPM	6.52	2.12	1.82	23.72	31.49	41.02	21.69	20.58	14.71	10.22	12.07	13.01	14.94	11.94	14.07	11.26	7.21	5.79	0.45	1.6	0.27
HORVU.MOREX.r3.1HG0017780	TPM	0	0	0	0	0	0	0	0	0	0	0	0	0	0	0	0	0	0	0	0	0
HORVU.MOREX.r3.1HG0017790	TPM	0	0	0	0	0	0	0	0	0	0	0	0	0	0	0	0	0	0	0	0	0
HORVU.MOREX.r3.1HG0017820	TPM	0	0	0	0	0	0	0	0	0	0	0	0	0	0	0	0	0	0	0	0	0
HORVU.MOREX.r3.1HG0017870	TPM	15.4	12.01	17.56	12.06	18.21	13.12	9.76	9.86	8.55	7.01	6.04	6.33	6.45	6.89	6.59	6.2	6.71	4.04	7.75	9.65	10.26
HORVU.MOREX.r3.1HG0017880	TPM	27.7	18.61	26.34	24.12	25.29	17.77	21.74	20.22	20.61	20.84	22.23	23.38	21.9	24.08	24.92	20.09	22.4	24.03	4.19	6.84	4.86
HORVU.MOREX.r3.1HG0017890	TPM	21.47	16.88	20.76	23.05	19.6	17.18	23.32	22.59	21.32	18.69	20.57	20.56	17.87	20.21	20.01	19.43	19.31	21.44	19.19	21.67	17.07
HORVU.MOREX.r3.1HG0017900	TPM	0	0	0	0	0	0	0	0	0	0	0	0	0	0	0	0	0	0	0	0	0
HORVU.MOREX.r3.1HG0017920	TPM	0	0	0	0	0	0	0	0	0	0	0	0	0	0	0	0	0	0	0	0	0
HORVU.MOREX.r3.1HG0017930	TPM	4.11	2.76	1.91	8.39	4.94	5.07	2.8	2.78	2.83	3.31	2.22	2.75	2.75	2.96	1.91	2.14	2.66	2.92	0.59	1.52	2.78
HORVU.MOREX.r3.1HG0017940	TPM	0	0	0	0	0	0	0	0	0	0	0	0	0	0	0	0	0	0	0	0	0
HORVU.MOREX.r3.1HG0017960	TPM	0	0	0.44	0.24	0	0	0	0.16	0.17	0.15	0	0	0	0	0.23	0	0	0	0	0	0.2
HORVU.MOREX.r3.1HG0017980	TPM	89.93	130.1	87.51	57.24	46.08	48.22	19	19.35	19.47	26.33	20.56	21.26	24.11	18.57	17.91	26.1	26.46	29.97	44.41	51.59	57.34
HORVU.MOREX.r3.1HG0018000	TPM	0.06	0	0	0	0	0	0	0	0	0	0	0	0	0	0	0	0	0	0	0	0
HORVU.MOREX.r3.1HG0018050	TPM	0.04	0	0	0.63	0.42	0.99	0.98	0.67	0.48	0.94	1.05	1.01	0.96	0.8	1.09	1.45	1.3	0.58	0.11	0	0
HORVU.MOREX.r3.1HG0018110	TPM	155.75	147.74	152.96	121.87	95.16	106.75	72.14	72.88	74.82	94.34	71.21	99.1	81.36	92.8	86.16	71.48	87.71	101.05	14.51	33.28	26.71
HORVU.MOREX.r3.1HG0018130	TPM	87.76	110.35	106.01	56.17	57.86	57.58	49.96	50.52	52.74	62.02	66.17	57.25	64.31	59.52	59.73	73.52	71.33	74.49	66.31	97.24	107.15
HORVU.MOREX.r3.1HG0018150	TPM	0	0	0	0.07	0.04	0	0.09	0	0	0	0	0	0.05	0	0	0.04	0	0	0	0.11	0
HORVU.MOREX.r3.1HG0018160	TPM	0	0	0	0	0	0	0	0	0	0	0	0	0	0	0	0	0	0	0	0	0
HORVU.MOREX.r3.1HG0018170	TPM	0.14	0.27	0.04	0.35	0.58	0.59	0.3	0.96	0.25	2.49	0.92	2.67	2.56	4.44	1.43	3.39	4.89	2.68	0.2	0.29	0.1
HORVU.MOREX.r3.1HG0018190	TPM	75.37	81.75	80.16	104.75	81.03	79.07	235.32	209.38	210.25	268.61	317.23	295.75	339.25	355.13	362	345.6	390.45	373.61	146.02	159.27	168.12
HORVU.MOREX.r3.1HG0018200	TPM	0.73	0.55	0.55	1.55	1.49	0.59	2.28	1.41	1.82	2.52	1.83	2.14	3.49	2.68	2.72	2.5	2.29	2.58	0.64	0.95	0.7
HORVU.MOREX.r3.1HG0018210	TPM	14.21	9.69	9.82	19.01	21.52	29.53	12.23	15.69	19.03	13.24	11.15	12.3	7.99	11.95	12.15	9.09	11.3	9.41	12.31	14.66	17.81
HORVU.MOREX.r3.1HG0018240	TPM	22.44	13.39	12.11	15.05	21.61	21.22	5.36	6.54	7.92	5.98	4.33	4.99	3.93	4.51	5.1	8.67	3.37	3.48	6.4	10.21	12.54
HORVU.MOREX.r3.1HG0018250	TPM	6.93	4.18	3.68	4.53	12.48	11.84	2.43	2.44	2.54	2.32	1.09	1.34	1.47	2.02	1.53	1.52	1.79	0.94	2.23	5.92	2.82
HORVU.MOREX.r3.1HG0018260	TPM	1027	1612.3	1444.68	762.17	1047.93	705.81	283.7	317.72	461.74	474.09	406.29	370.07	377.8	328.73	271.18	431.6	545.68	298.67	1956.2	1458.8	1654.5
HORVU.MOREX.r3.1HG0018270	TPM	171.37	188.52	206.89	139.61	165.23	145.46	110.03	107.37	133.98	124.5	118.99	124.81	107.73	123.6	118.61	117.21	116.87	117.35	194.26	187.69	200.9
HORVU.MOREX.r3.1HG0018350	TPM	0.46	0.33	0.22	0	0.19	0.37	0	0	0.1	0.19	0	0	0.1	0.3	0	0.09	0	0	0.25	0	0.62
HORVU.MOREX.r3.1HG0018360	TPM	0	0	0	0	0	0	0	0	0	0	0	0	0	0	0	0	0	0	0	0	0
HORVU.MOREX.r3.1HG0018390	TPM	4.9	2.59	1.92	31.49	37.63	81.33	41.47	47.42	28.76	26.2	32.33	30.51	19.93	21.16	22.55	15.68	16.01	15.17	2.19	5.79	0.91
HORVU.MOREX.r3.1HG0018400	TPM	0.28	0.72	0.85	0.34	0.22	0.83	0	0	0.08	0.32	0	0.55	0.59	0.77	0	0.51	0.27	0	0.41	1.02	2.36
HORVU.MOREX.r3.1HG0018410	TPM	0	0	0	0	0	0	0	0	0	0	0	0	0	0	0	0	0	0	0	0	0
HORVU.MOREX.r3.1HG0018420	TPM	0.29	0.28	0.42	0.18	0.12	0	0.24	0.24	0.13	0	0.12	0	0.13	0.13	0.12	0.23	0.24	0.4	0	0	0.31
HORVU.MOREX.r3.1HG0018430	TPM	5.07	1.53	0.8	16.82	23.69	30.39	29.09	28.58	19.08	17.51	21.66	26.28	16.49	15.36	19.49	15.85	10.56	6.98	3.78	3.2	0.78
HORVU.MOREX.r3.1HG0018480	TPM	0	0	0	0	0	0	0	0	0	0	0	0	0	0	0	0	0	0	0	0	0
HORVU.MOREX.r3.1HG0018490	TPM	0	0	0	0	0	0	0	0	0	0	0	0.53	0	0	0	0	0	0	0	0	0
HORVU.MOREX.r3.1HG0018510	TPM	6.63	6.31	6.55	6.9	8.35	15.83	10.83	13.63	9.84	10.21	10.11	12.06	13.48	14.37	14.69	15.35	12.24	9.35	2.12	3.46	1.94
HORVU.MOREX.r3.1HG0018570	TPM	0	0	0	0	0	0	0	0	0	0	0	0	0	0	0	0	0	0	0	0	0
HORVU.MOREX.r3.1HG0018590	TPM	9.66	6.88	7.3	10.73	12.82	11.35	4.34	3.74	5.48	2.48	2.33	2.95	2.45	1.97	2.4	2.63	1.56	2.08	1.41	2.67	1.18
HORVU.MOREX.r3.1HG0018610	TPM	0	0	0	0	0	0	0	0	0	0	0	0	0	0	0	0	0	0	0	0	0
HORVU.MOREX.r3.1HG0018620	TPM	0	0	0	0	0	0.12	0.3	0.24	0.26	0.77	0.6	1.21	0.2	0.06	0.18	0.23	1.33	1	0	0	0
HORVU.MOREX.r3.1HG0018630	TPM	0	0	0	0	0	0	0	0	0	0	0	0	0	0	0	0	0	0	0	0	0
HORVU.MOREX.r3.1HG0018640	TPM	0	0	0	0	0	0	0	0	0	0	0	0	0	0	0	0	0	0	0	0	0
HORVU.MOREX.r3.1HG0018730	TPM	131.24	111.53	122.95	154.55	149.5	159.64	143.73	148.43	141.3	148.06	141.55	146.62	139.07	132.58	140.2	136.53	130.9	157.67	249.66	253.09	242.5
HORVU.MOREX.r3.1HG0018760	TPM	0	0	0	0	0	0	0	0	0	0	0	0	0	0	0	0	0	0	0	0	0
HORVU.MOREX.r3.1HG0018770	TPM	0	0	0	0	0	0	0	0	0	0	0	0	0	0	0	0	0	0	0	0	0
HORVU.MOREX.r3.1HG0018780	TPM	0	0	0	0	0	0	0	0	0.02	0	0	0	0.19	0	0	0	0	0	0	0	0.12
HORVU.MOREX.r3.1HG0018790	TPM	0	0	0	0	0	0	0	0	0	0	0	0	0	0	0	0	0	0	0	0	0
HORVU.MOREX.r3.1HG0018800	TPM	264.47	279.18	371.09	26.78	12.1	19.72	118.96	131.4	114.28	136	126.46	122.17	136.32	112.63	100.26	129.13	157.18	99.22	4038.44	2685.4	1734.19
HORVU.MOREX.r3.1HG0018810	TPM	26.9	29.16	29.02	25.67	18.13	19.15	41.04	40.94	40.45	39.32	46.61	42.57	44.99	46.41	46.34	48.73	48.51	42.68	48.42	60.01	46.69
HORVU.MOREX.r3.1HG0018820	TPM	0.05	0.05	0.05	0.19	0.13	0.45	0.04	0.04	0	0.08	0	0.04	0.14	0.22	0.25	0.44	0.13	0.42	0.29	0.05	0.06
HORVU.MOREX.r3.1HG0018830	TPM	0	0	0	0.05	0	0.17	0	0	0.08	0.07	0	0	0	0	0	0	0	0	0	0	0
HORVU.MOREX.r3.1HG0018930	TPM	1.04	1.68	1.89	1.06	0.9	1.31	0.39	0.87	0.71	1.09	0.87	0.7	0.97	0.85	0.97	1.2	0.99	0.8	2.98	2.7	1.95
HORVU.MOREX.r3.1HG0018940	TPM	12.3	9.95	8.27	15.37	14.8	16.28	16.86	14.38	16.46	15.15	17.52	16.1	13.51	15.74	12.41	13.65	12.02	13.53	6.78	6.34	8.43
HORVU.MOREX.r3.1HG0018950	TPM	0.01	0.19	0.18	0.17	0	0.15	0	0.16	0.02	0	0	0.06	0	0	0	0	0	0	0	0	0
HORVU.MOREX.r3.1HG0019040	TPM	0	0	0	0	0	0	0	0	0	0	0	0	0	0	0	0	0	0	0	0	0
HORVU.MOREX.r3.1HG0019050	TPM	0	0	0	0	0	0	0	0	0	0	0	0	0	0	0	0	0	0	0	0	0
HORVU.MOREX.r3.1HG0019060	TPM	45.84	44.83	44.78	50.58	44.56	49.29	33.41	33.02	36.44	35.7	33.19	37.95	35.93	41.08	39.18	38.27	36.22	38.95	15.23	22.96	23.65
HORVU.MOREX.r3.1HG0019070	TPM	0	0	0	0	0	0	0	0	0	0	0	0	0	0	0	0	0	0	0	0	0
HORVU.MOREX.r3.1HG0019100	TPM	18.03	27.9	15.86	9.28	15.19	18.88	4.13	3.99	3.76	6.75	2.42	3.51	6.97	4.41	4.08	6.04	6.17	4.58	3.78	5.69	7.16
HORVU.MOREX.r3.1HG0019140	TPM	0	0	0	0.37	0	0.47	0.24	0.49	0	0.48	0	0.26	0.26	0.76	1.2	0.93	1.7	0.4	0	0	0
HORVU.MOREX.r3.1HG0019150	TPM	0	0	0	0.56	0.09	0.27	0.73	1.74	0.99	1.08	0.18	0.39	0.89	0.86	0.18	0.61	0.73	0.3	0	0	0
HORVU.MOREX.r3.1HG0019160	TPM	0	0	0	1.87	1.09	1.85	23.01	31.87	21.45	20.54	25.28	23.65	28.36	36.19	26.37	31.78	38.12	23.77	0.47	1.4	0.35
HORVU.MOREX.r3.1HG0019170	TPM	9.53	5.25	7.03	15.6	13.44	12.15	10.79	9.39	10.04	9.03	8.18	9.45	6.87	6.95	7.63	5.83	5.5	6.26	0.59	1.83	1.15
HORVU.MOREX.r3.1HG0019220	TPM	0.63	0.12	0.12	5.91	2.94	2.74	5.19	7.11	4.51	3.3	3.88	5.76	7.33	6.67	6.58	4.38	4.39	3.48	0.36	0	0.54
HORVU.MOREX.r3.1HG0019230	TPM	5.11	2.24	2.64	33.16	23.54	30.97	36.17	44.92	42.17	28.83	21.49	26.46	29.4	27.97	25.42	23.39	24.28	23.04	0.45	1.23	2.95
HORVU.MOREX.r3.1HG0019240	TPM	3.07	2.14	3.05	6.47	5.67	5.18	4.31	4.54	5.47	4.74	4.98	6.31	5.64	5.19	6.52	5.62	5.85	7.57	2.17	2.15	5.64
HORVU.MOREX.r3.1HG0019260	TPM	1970.22	2826.35	2356.74	804.31	1196.91	822.89	441.72	426.87	552	665.1	485.56	546.46	466.83	478.41	442.81	595.61	513.75	618.58	292.41	194.58	299.13
HORVU.MOREX.r3.1HG0019270	TPM	2.06	4.62	4.66	1.58	1.25	3.8	2.52	2.23	2.22	2.16	2.46	1.59	4.73	3.64	2.95	5.24	3.65	3.15	15.25	9.93	8.72
HORVU.MOREX.r3.1HG0019320	TPM	11.72	10.59	10.77	23.7	22.7	22.23	16.33	13	16.8	15.05	15.45	16.54	15.65	14.37	15.05	13.77	14.63	19.23	6.41	7.88	8.6
HORVU.MOREX.r3.1HG0019330	TPM	0.24	0.12	0.16	1.09	0.82	1.06	2.84	3.8	2.57	2.88	2.97	3.31	3.92	4.16	4.78	4.11	5.71	3.62	0.41	0.92	0.66
HORVU.MOREX.r3.1HG0019340	TPM	12.45	14.01	11.24	13.58	10.32	9.61	15.43	15.5	12.98	21.23	20.66	18.32	22.22	19.39	17.22	28.42	25.57	23.9	15.6	13.24	17.29
HORVU.MOREX.r3.1HG0019350	TPM	0	0	0	0	0	0	0.04	0	0	0	0	0	0	0	0	0	0	0	0	0	0
HORVU.MOREX.r3.1HG0019360	TPM	210.12	217.77	197.68	134.05	152.78	125.38	78.83	70.72	92.8	73.23	80.15	76.83	63.74	67.83	68.22	63.39	65.55	77.52	61.11	79.66	106.48
HORVU.MOREX.r3.1HG0019380	TPM	285.52	304.25	314.8	172.46	202.01	146.31	129.87	133.19	139.28	126.25	141.38	139.11	140.01	159.85	152.86	160.89	153.93	201.8	174.12	198.79	227.85
HORVU.MOREX.r3.1HG0019390	TPM	0.46	0	0.45	0.59	1.93	4.5	0.77	1.16	0.42	0.38	0.39	0.82	1.66	1.21	1.52	2.57	0.39	0.64	1.66	0.99	0.5
HORVU.MOREX.r3.1HG0019400	TPM	0	0	0	0	0	0	0	0	0	0	0	0	0	0	0	0	0	0	0	0	0.21
HORVU.MOREX.r3.1HG0019410	TPM	7.32	5.03	7.9	16.23	11.92	10.94	23.95	22.48	23.44	27.68	30.57	30.22	29.12	27.29	26.47	25.55	32.15	34.19	17.09	20.42	19.56
HORVU.MOREX.r3.1HG0019420	TPM	32.73	24.06	27.49	41.97	38.03	30.62	35.98	31.36	40.53	34.7	37.95	41.47	33.76	35.76	34.15	26.28	34.9	36.96	18.72	23.03	20.24
HORVU.MOREX.r3.1HG0019550	TPM	41.83	35.63	44.03	36.33	42.9	39.87	28.65	29.2	35.55	24.22	26.18	26.36	20.41	27.17	25.27	20.08	24.25	30.24	55.13	40.92	76.04
HORVU.MOREX.r3.1HG0019580	TPM	5.44	6.28	5.4	3.15	3.29	4.09	3.64	3.31	2.86	3.91	3.44	3.64	3.64	4.62	4.28	4.22	4.16	4.69	1.77	2.73	2.37
HORVU.MOREX.r3.1HG0019650	TPM	0.7	0.58	0.61	0.85	0.87	1.05	0.58	0.46	0.53	1.49	1.21	0.72	1.23	1.07	0.88	1.3	2.1	1.6	1.42	1.99	1.37
HORVU.MOREX.r3.1HG0019660	TPM	0.06	0.14	0.06	0.37	0.33	0.3	0.31	0.03	0.15	0.1	0.16	0.11	0.04	0.07	0.09	0.08	0.05	0.17	0.02	0	0.02
HORVU.MOREX.r3.1HG0019680	TPM	7.32	4.92	4.81	27.7	19.61	14.95	17.47	17.12	22.45	24.39	26.86	29.79	27.3	24.59	28.41	23.26	20.96	33.8	2.64	2.85	8.08
HORVU.MOREX.r3.1HG0019690	TPM	0	0	0	0	0	0	0	0	0	0	0	0	0	0	0	0	0	0	0	0	0
HORVU.MOREX.r3.1HG0019730	TPM	78.67	88.6	92.9	63.04	52.36	48.36	45.74	41.72	46.29	42.66	42.07	46.07	46.88	51.55	51.55	44.62	50.43	69.38	27.59	40.35	41.53
HORVU.MOREX.r3.1HG0019840	TPM	0	0	0	0	0	0	0	0	0	0	0	0	0	0	0	0	0	0	0	0	0
HORVU.MOREX.r3.1HG0019870	TPM	84.17	113.53	101.57	65.22	55.02	55.79	41.35	36.01	43.34	44.44	39.04	43.49	47.97	44.31	43.92	41.67	45.42	53.92	31.39	37.11	36.8
HORVU.MOREX.r3.1HG0019920	TPM	65.93	77.55	62.83	76.76	66.19	61.96	62.9	61.65	67.91	63.95	60.88	60.26	67.97	60.06	64	58.17	63.67	55.78	20.58	32.81	33.04
HORVU.MOREX.r3.1HG0019930	TPM	21.56	20.31	19.51	24.04	18.38	21.58	21.31	18.99	19.07	18.09	16.74	19.68	15.96	16.58	17.48	14.92	14.81	18.06	4.69	7.32	5.46
HORVU.MOREX.r3.1HG0019940	TPM	0	0	0	0	0	0	0	0	0	0	0	0	0	0	0	0	0	0	0	0	0
HORVU.MOREX.r3.1HG0019950	TPM	0	0	0	0	0	0	0	0	0	0	0	0	0	0	0	0	0	0	0	0	0
HORVU.MOREX.r3.1HG0019960	TPM	0.36	0.11	0.07	0.73	0.46	0.68	1.1	0.47	0.57	2.48	0.59	0.9	3.31	3.92	1.67	1.31	5.54	4.63	0	0.04	0.16
HORVU.MOREX.r3.1HG0019970	TPM	0.16	0.08	0	0.26	0.16	0.28	0.47	0.18	0.43	1.36	0.47	0.89	1.77	2.59	1.24	0.7	3.17	1.52	0	0	0
HORVU.MOREX.r3.1HG0019980	TPM	21.5	21.97	25.36	17.64	16.28	17.85	21.28	21.26	23.47	24.08	22.14	24.57	25.53	28.12	25.1	25.13	27.82	33.91	37.14	36.86	40.31
HORVU.MOREX.r3.1HG0019990	TPM	0	0	0	0	0	0	0	0	0	0	0	0	0	0	0	0	0	0	0	0	0
HORVU.MOREX.r3.1HG0020010	TPM	0	0	0	0	0	0	0	0	0	0	0	0	0	0	0	0	0	0	0	0	0
HORVU.MOREX.r3.1HG0020170	TPM	0	0	0	0	0	0	0	0	0.21	0	0	0	0	0	0	0	0	0	0	0	0
HORVU.MOREX.r3.1HG0020180	TPM	0.04	0.2	0.2	0	0.07	0	0	0	0	0	0	0	0	0	0	0	0	0	0.06	0	0.04
HORVU.MOREX.r3.1HG0020190	TPM	7.13	6.82	6.23	9.95	5.68	6.68	12.34	20.61	11.65	54.56	31.24	52.39	37.39	62.82	37.32	34.62	60.22	77.2	1.03	1.14	1.36
HORVU.MOREX.r3.1HG0020210	TPM	22.04	23.16	24.56	10.17	11.94	8.93	9.06	8.8	7.82	7.84	7.98	9.83	7.17	8.98	8.81	8.29	9.4	12.01	5.14	8.13	10.64
HORVU.MOREX.r3.1HG0020220	TPM	40.48	36.35	37.71	38.8	36.22	32.6	29.75	26.95	30.58	23.85	21.85	24.81	24.22	23.89	22.42	17.84	23.19	25.8	9.5	14.22	17.05
HORVU.MOREX.r3.1HG0020250	TPM	0	0	0	0	0	0	0	0	0	0	0	0	0	0	0	0	0	0	0	0	0
HORVU.MOREX.r3.1HG0020260	TPM	0	0	0	0.16	0.03	0.03	1.1	1.17	0.52	1.16	1.11	0.88	0.78	0.58	1.36	2.43	1.14	1.78	0	0.13	0.04
HORVU.MOREX.r3.1HG0020270	TPM	94.3	96.22	98.9	90.04	76.54	78.21	74.87	70.28	75.8	73.46	71.42	73.18	72.66	79.21	72.34	73.71	75.4	102.56	62.51	94.66	94.24
HORVU.MOREX.r3.1HG0020280	TPM	73	55.54	61.51	95.62	79.03	79.49	94.29	88.91	90.53	87.39	94.08	99.23	83.91	89.79	92.69	76.01	78.8	93.58	44.57	60.62	49.79
HORVU.MOREX.r3.1HG0020290	TPM	6.83	3.81	5.73	4.74	4.05	3.18	3.51	3.51	3.77	2.61	2.58	3.42	2.53	2.39	3.3	2.05	2.47	3.11	0.65	0.86	0.44
HORVU.MOREX.r3.1HG0020300	TPM	45.76	38.47	40.78	36.21	37.91	27.41	26.65	25.31	25.59	20.39	20.78	24.74	19.74	22.52	22.31	18.87	20.18	23.51	8.09	15.33	12.53
HORVU.MOREX.r3.1HG0020310	TPM	0.21	0.41	0.27	0.98	0.47	0.28	0.41	0.23	0.31	0.29	0.12	0.06	0.38	0.18	0.4	0.22	0.12	0.19	0.4	0.22	0.68
HORVU.MOREX.r3.1HG0020320	TPM	1.97	1.92	1.76	1.91	1.76	1.75	1.43	1.8	1.72	1.4	1.58	1.74	1.65	1.85	1.5	1.34	1.64	1.4	0.9	1.3	1.58
HORVU.MOREX.r3.1HG0020390	TPM	0.04	0	0	0	0.03	0	0	0	0	0	0	0	0	0.09	0	0	0	0.05	0	0	0
HORVU.MOREX.r3.1HG0020430	TPM	0	0	0	0.12	0.08	0	0	0	0	0	0	0	0	0	0	0	0	0	0	0	0
HORVU.MOREX.r3.1HG0020440	TPM	0.04	0.13	0.39	0.98	0.08	0.87	1.19	0.64	0.4	1.22	0.41	0.6	1.21	2.47	1.81	0.68	1.61	1.88	0.29	0	0.24
HORVU.MOREX.r3.1HG0020450	TPM	0	0.06	0.03	0.08	0	0.1	0.59	4.67	0	13.19	0.41	2.95	5.79	19.17	1.6	10	19.29	12.47	0	0	0
HORVU.MOREX.r3.1HG0020460	TPM	0	0	0	0	0	0	0	0	0	0	0	0	0	0	0	0	0	0	0	0	0
HORVU.MOREX.r3.1HG0020520	TPM	0	0	0	0	0	0	0	0	0	0	0	0	0	0	0	0	0	0	0	0	0.22
HORVU.MOREX.r3.1HG0020590	TPM	0	0	0	0	0	0	0	0	0	0	0	0	0	0	0	0	0	0	0	0	0
HORVU.MOREX.r3.1HG0020650	TPM	5.71	4.61	4.26	3.38	1.88	2.88	3.08	3.18	3.21	4.37	2.6	3.34	4.49	5.53	5.26	4.78	6.96	4.88	3.09	3.02	1.74
HORVU.MOREX.r3.1HG0020680	TPM	0.14	0.14	0.32	0.12	0	0.11	0	0	0	0.04	0	0.04	0	0.08	0.04	0.04	0	0	0.1	0.2	0.31
HORVU.MOREX.r3.1HG0020730	TPM	0	0	0	0	0	0	0	0	0	0	0	0	0	0	0	0	0	0	0	0	0
HORVU.MOREX.r3.1HG0020760	TPM	0	0	0	0.01	0	0	0	0	0	0	0	0	0.06	0	0	0	0.01	0	0	0	0
HORVU.MOREX.r3.1HG0020780	TPM	0	0	0	0	0	0	0	0	0	0	0	0	0	0	0	0	0	0	0	0	0
HORVU.MOREX.r3.1HG0020790	TPM	0	0	0	0	0	0	0	0	0	0	0	0	0	0	0	0	0	0	0	0.29	0
HORVU.MOREX.r3.1HG0020800	TPM	0	0	0	0	0	0	0	0	0	0	0	0	0	0	0	0	0	0	0	0	0
HORVU.MOREX.r3.1HG0020820	TPM	7.82	5.55	6.07	36.11	18.39	22.98	62.92	62.64	60.07	36.14	52.1	58.21	41.67	38.23	44.73	37.07	32.27	39.3	0.89	2.91	0.69
HORVU.MOREX.r3.1HG0020840	TPM	1.75	1.44	1.41	1.39	1.75	1.71	1.2	0.91	1.51	1.23	0.95	1.04	0.79	0.9	1.29	1.03	0.98	1.48	0.79	1.21	0.8
HORVU.MOREX.r3.1HG0020850	TPM	0.62	1.17	1.12	0.58	0.45	0.55	0.7	0.49	1	1.27	1.24	1.63	1.28	1.13	1.54	1.05	1.45	1.94	0.61	0.79	0.49
HORVU.MOREX.r3.1HG0020900	TPM	5.44	2.5	1.15	34.54	37.76	66.44	45.24	53.14	33.11	37.57	35.81	42.71	33.11	33.73	34.81	33.08	28.71	16.17	3.97	4.7	0
HORVU.MOREX.r3.1HG0020910	TPM	8.53	2.84	4.8	43.49	48.45	92.48	52.28	61.7	36.17	33.86	31	34.9	22.85	21.05	28.15	26.18	16.32	17.37	1.91	4.5	0.75
HORVU.MOREX.r3.1HG0020930	TPM	19.72	17.29	19.19	19.85	20.35	21.42	14.98	14.14	15.52	13.15	13.28	14.22	13.45	15.78	14.32	14.38	14.57	14.05	9.33	9.94	13.23
HORVU.MOREX.r3.1HG0020980	TPM	3.74	0.96	0.95	25.89	10.39	23.22	6.78	6.83	7.68	3.32	4.87	4.58	4.72	2.57	4.25	3.76	2.64	2.88	0.12	1.11	0.81
HORVU.MOREX.r3.1HG0020990	TPM	0.55	0.61	0.38	1.1	1.84	2.76	0.97	0.82	0.46	0.8	0.75	0.66	1.27	0.72	0.67	0.9	1.11	1.14	0	0	0
HORVU.MOREX.r3.1HG0021010	TPM	6.84	4	6.05	3.1	4.84	3.93	2.93	3.15	3.19	2.06	2.46	2.71	2.68	2.81	2.77	1.55	1.86	1.99	1.58	1.07	2.51
HORVU.MOREX.r3.1HG0021020	TPM	1.84	1.99	1.98	1.99	1.61	1.08	2.24	1.37	1.53	1.95	1.4	1.62	2.28	1.73	1.65	1.84	1.93	1.71	1.41	1.05	0.94
HORVU.MOREX.r3.1HG0021090	TPM	2.9	1.96	2.78	3.88	3.5	3.23	4.04	5.23	4.84	4.39	4.35	4.47	4.38	4.45	4.99	3.12	5.27	3.45	1.45	2.51	5.59
HORVU.MOREX.r3.1HG0021100	TPM	5.16	6.35	5.3	4.69	2.41	2.67	5.39	4.29	4.98	6.67	6.36	7.9	10.84	10.99	10.98	10.7	10.2	13	1.31	1.45	1.4
HORVU.MOREX.r3.1HG0021110	TPM	4.36	6.69	5.11	3.03	1.53	2.91	3.76	2.58	2.64	4.13	2.78	4.69	8.56	8.2	8.02	8.96	7.05	8.22	1.16	1.36	1.02
HORVU.MOREX.r3.1HG0021120	TPM	0	0	0	0	0	0	0	0	0	0	0	0	0	0	0	0	0	0	0	0	0
HORVU.MOREX.r3.1HG0021130	TPM	2.73	3.67	3.28	2.11	1.64	2.11	2.68	1.99	2.69	3.25	2.99	3.91	4.68	4.2	4.78	4.33	4.46	4.22	0.58	0.83	1.24
HORVU.MOREX.r3.1HG0021150	TPM	2.94	3.5	2.83	2.85	1.2	1.81	2.51	2.06	1.93	2.23	1.43	3.06	2.08	3.41	2.45	1.99	2.72	3.65	0.11	0.13	0.39
HORVU.MOREX.r3.1HG0021190	TPM	0	0	0	0	0	0.08	0	0	0	0	0	0.09	0	0	0	0	0	0.14	0	0	0
HORVU.MOREX.r3.1HG0021200	TPM	0	0	0.08	0.5	0.13	0.28	0.58	0.65	1.02	0.74	0.95	0.34	0.49	0.71	0.77	0.46	0.68	0.87	0.08	0.13	0
HORVU.MOREX.r3.1HG0021220	TPM	0	0.35	0.42	0.26	0.1	0.09	0	0	0.16	0.05	0	0.09	0	0.44	0.24	0	0.07	0.59	0.46	0	0.55
HORVU.MOREX.r3.1HG0021240	TPM	6.66	8.04	6.15	18.57	10.5	13.48	16.18	14.48	17.04	18.48	19.91	21.04	21.41	19.82	19.19	17.95	25.26	24.51	3.77	3.17	5.39
HORVU.MOREX.r3.1HG0021280	TPM	0	0	0	0	0	0	0	0	0	0	0	0	0	0	0	0	0	0	0	0	0
HORVU.MOREX.r3.1HG0021290	TPM	0.09	0.08	0.13	0.11	0.11	0.21	0.25	0.29	0	0.18	0	0.04	0.15	0	0.04	0.03	0.04	0	0	0	0
HORVU.MOREX.r3.1HG0021310	TPM	0.04	0.04	0.07	0.05	0.03	0	0.1	0	0.03	0.03	0.05	0.1	0.07	0.07	0.03	0.09	0.06	0	0.06	0.37	0.21
HORVU.MOREX.r3.1HG0021320	TPM	47.82	34.1	45.85	88.9	77.86	66.05	79.1	80.41	78.42	61.34	71.71	72.6	56.79	53.58	59.33	51.72	46.62	53.39	31.91	44.6	33.29
HORVU.MOREX.r3.1HG0021330	TPM	158.94	131.76	142.32	168.08	168.24	147.67	130.37	125.58	123.1	99.77	96.9	109.12	97.74	103.58	104.05	91.95	92.9	108.1	52.14	89.16	70.83
HORVU.MOREX.r3.1HG0021340	TPM	18.05	26.01	24.05	125.2	104.39	226.13	24.88	26.4	29.31	45.4	32.21	28.71	35.4	47.81	28.59	37.78	45.45	56.39	7.29	8.09	8.27
HORVU.MOREX.r3.1HG0021350	TPM	14.48	17.99	15.29	50.42	50.87	122.86	8.23	8.56	10.26	15.5	9.66	9.12	12.56	12.94	7.92	16.95	15.44	12.58	18.27	20.19	14.5
HORVU.MOREX.r3.1HG0021360	TPM	42.11	67.71	54.79	16.42	21.83	28.41	6.01	6.66	8.32	13.56	8.97	7.58	8.45	10.2	9.4	10.34	13.38	16.02	65.75	45.13	88.32
HORVU.MOREX.r3.1HG0021380	TPM	2.15	5.02	1.94	3.92	7.02	12.39	1.72	1.41	1.04	3.03	0.9	1.76	1.8	2.15	0.88	3.17	1.6	1.6	1.66	3.45	5.34
HORVU.MOREX.r3.1HG0021390	TPM	0.08	0.82	0.08	14.81	6.7	23.46	0.21	0.14	0.61	0.55	0.21	0.15	0.23	0.44	0	0.4	0.84	0	0	0	0.18
HORVU.MOREX.r3.1HG0021400	TPM	0	0	0	0.36	0.36	0.35	0.24	0.53	0.26	0.35	0.24	0.19	0.57	0.31	0.41	0.28	0.12	0.1	0	0.08	0
HORVU.MOREX.r3.1HG0021430	TPM	0	0	0	0	0.02	0.09	0	0	0	0	0	0	0	0	0	0	0	0	0	0	0
HORVU.MOREX.r3.1HG0021440	TPM	0	0	0	0	0	0	0	0	0	0	0	0	0	0	0	0	0	0	0	0	0
HORVU.MOREX.r3.1HG0021450	TPM	23.35	20.59	23.77	19.27	21.21	16.81	9.36	11.94	12.78	10.17	9.84	10.39	6.62	6.98	9.38	6.71	9.39	8.6	14.27	13.07	18.05
HORVU.MOREX.r3.1HG0021570	TPM	0	0	0	0	0	0	0	0	0	0	0	0	0	0	0	0	0	0.4	0	0	0
HORVU.MOREX.r3.1HG0021610	TPM	6.42	7.3	6.99	6.96	5.6	4.83	10.31	10.01	12.14	9.6	9.55	8.17	6.84	8.68	6.95	4.16	6.32	5.74	9.58	4.27	5.12
HORVU.MOREX.r3.1HG0021620	TPM	0	0	0	0	0	0	0	0	0	0	0	0	0	0	0	0	0	0	0	0	0
HORVU.MOREX.r3.1HG0021640	TPM	0	0	0	0	0.04	0.04	0.16	0.08	0.04	0.46	0.24	0.37	1.18	1.15	0.31	1.16	0.9	0.33	0	0	0
HORVU.MOREX.r3.1HG0021670	TPM	0	0	0	0	0	0	0	0	0	0	0	0	0	0	0	0	0	0	0	0	0
HORVU.MOREX.r3.1HG0021690	TPM	0	0	0	0.13	0.13	0.33	2.43	1.29	1.71	6.77	3.53	4.86	10.92	13.02	7.67	8.62	10.29	6.22	0	0	0
HORVU.MOREX.r3.1HG0021710	TPM	0.05	0	0	0.79	0.17	0.25	2.38	4.71	2.49	7.01	3.65	4.63	4.16	6.63	6.19	5.18	9.29	8.14	0	0	0
HORVU.MOREX.r3.1HG0021720	TPM	0.73	0.84	0.37	0.74	0.74	0.49	0.61	0.44	0.23	0.46	0.25	0.53	0.23	0.33	0.21	0.38	0.5	0.39	0.42	0.49	0.93
HORVU.MOREX.r3.1HG0021740	TPM	0	0	0	0	0	0	0	0	0	0	0	0	0	0	0	0	0	0	0	0	0
HORVU.MOREX.r3.1HG0021770	TPM	35.71	29.86	38.51	34.89	39.06	28.75	26.41	25.52	27.15	23.08	22.5	27.43	22.61	24.94	24.56	22.01	20.91	25.9	8.25	12.97	12
HORVU.MOREX.r3.1HG0021780	TPM	7.69	9.31	9.89	4.99	1.76	1.99	40.18	34.46	35.41	40.68	46.41	44.06	49.18	49.21	47.55	36.16	50.23	59.78	16.66	26.8	24.55
HORVU.MOREX.r3.1HG0021800	TPM	3.32	3.67	3.38	0.8	1.61	2.12	0.34	0.31	0.56	0.18	0.19	0.1	0.2	0.55	0.18	0.26	0.12	0.41	7.55	5.57	8.21
HORVU.MOREX.r3.1HG0021810	TPM	0	0	0	0	0	0	0	0	0	0	0	0	0	0	0	0	0	0	0	0	0
HORVU.MOREX.r3.1HG0021820	TPM	0	0	0	0	0	0	0	0	0	0	0	0	0	0	0	0	0	0	0	0	0
HORVU.MOREX.r3.1HG0021830	TPM	164.81	149.8	169.3	160.31	159.28	133.14	115.12	112.56	124.3	114.25	122.25	125.21	109.17	111.36	111.49	115.44	114.34	126.17	160.37	150.79	152.22
HORVU.MOREX.r3.1HG0021840	TPM	0	0	0	0	0.05	0	0	0	0	0	0	0	0.05	0	0	0.05	0	0	0	0	0
HORVU.MOREX.r3.1HG0021870	TPM	13.35	19.17	14.57	10.02	11.97	18.57	9.35	8.86	7.39	10.38	8.68	9.92	11.58	12.81	11.59	16.97	14.68	9.26	18.84	21.95	23.76
HORVU.MOREX.r3.1HG0021880	TPM	3.07	2.62	3.55	3.68	4.73	4.21	3.72	4.86	4.78	4.84	5.68	5.88	6.22	4.42	5.51	6.31	6.57	5.87	0.97	1.99	3.27
HORVU.MOREX.r3.1HG0021960	TPM	1.02	1.02	0.69	1.27	1.98	1.43	5.16	8.29	2.1	28.54	5.04	23.99	17.03	24.33	16.8	22.59	22.66	35.93	0.96	3.27	1.72
HORVU.MOREX.r3.1HG0021970	TPM	10.76	10.58	12.08	10.27	23.32	27.38	5.4	10.25	22.94	28.18	9.97	25.83	17.03	25.65	22.64	18.72	22.65	33.62	4.35	2.53	7.39
HORVU.MOREX.r3.1HG0021980	TPM	0.65	0.27	0.2	0.78	1.2	1.94	0.23	0.31	0.28	0.11	0.23	0.18	0.15	0.12	0.08	0.22	0.26	0.14	0	0.51	0
HORVU.MOREX.r3.1HG0022060	TPM	262.44	234.79	264.4	219.57	209.32	191.67	147.81	139.11	158.04	151.14	136.96	156.65	147.53	162.79	150.05	140.16	151.47	196.18	80.52	116.74	123.24
HORVU.MOREX.r3.1HG0022070	TPM	150.35	143.54	160.51	159.14	146.87	135.96	128.4	114.32	138.97	125.95	130.98	134.51	138.27	140.47	140.06	127.62	143.17	186.32	58.67	75.36	83.6
HORVU.MOREX.r3.1HG0022080	TPM	0	0	0	0	0	0	0	0	0	0	0	0	0	0	0	0	0	0	0	0	0
HORVU.MOREX.r3.1HG0022090	TPM	42.19	33.81	37.36	55.47	48.64	48.48	44.04	40.37	42.12	44.04	44.14	46.95	41.89	45.06	42.4	42.47	43.26	60.3	18.58	30.18	31.09
HORVU.MOREX.r3.1HG0022100	TPM	6.36	10.31	13.02	1.17	1.36	0.52	0	0.04	0.19	0.04	0.05	0	0	0	0	0.04	0.09	0.07	13.79	5.25	6.32
HORVU.MOREX.r3.1HG0022120	TPM	7.42	5.44	8.09	20.72	12.74	15.15	19.69	17.99	18.66	16.69	17.04	20.92	18.24	17.6	19.4	16.21	17.09	19.72	7.02	10.48	8.73
HORVU.MOREX.r3.1HG0022320	TPM	0	0	0	0	0	0	0	0	0	0	0	0	0	0	0	0	0	0	0	0	0
HORVU.MOREX.r3.1HG0022330	TPM	0.01	0.01	0.01	0.05	0.02	0.04	0.03	0.02	0	0.06	0.07	0.07	0.06	0.09	0.07	0.02	0.08	0.16	0	0	0.03
HORVU.MOREX.r3.1HG0022340	TPM	0	0	0	0.27	0	0.17	0.17	0	0.38	0.34	0	0.18	0.19	0.36	0.68	0.33	0.17	0.29	0	0	0
HORVU.MOREX.r3.1HG0022350	TPM	39.27	36.42	38.16	66.38	52.9	56.22	60.91	60.54	60.32	63.73	63.33	64.51	55.59	62.04	55.7	50.46	61.33	62.4	33.73	48.75	52.23
HORVU.MOREX.r3.1HG0022360	TPM	1.33	1.2	1.53	2.48	2.06	1.63	2.01	1.82	2.46	2.22	2.06	2.44	2.55	2.83	2.07	1.95	2.28	3.09	0.12	0.22	0.15
HORVU.MOREX.r3.1HG0022380	TPM	0	0	0	0	0	0	0	0	0	0	0	0	0	0	0	0	0	0	0	0	0
HORVU.MOREX.r3.1HG0022400	TPM	4.42	5.03	4.35	3.25	2.8	4.25	2.96	3.15	1.37	2.4	2.2	1.63	3.32	2.97	4.64	3.79	4.49	4.3	9.66	8.13	6.63
HORVU.MOREX.r3.1HG0022430	TPM	0.34	0.3	0.48	0	1.04	1.8	0.82	1.51	1.34	2.41	1.44	1.6	1.88	2.35	1.14	2.55	1.57	2.75	2.02	1.89	3.35
HORVU.MOREX.r3.1HG0022440	TPM	90.62	75.08	82.81	104.19	72.34	79.56	72.23	68.39	71.08	68.64	58.02	76.17	62.3	72.28	72.11	57.5	65.14	95.06	22.36	41.59	34.12
HORVU.MOREX.r3.1HG0022450	TPM	109.57	103.72	116.82	62.26	69.71	56.3	49.89	43.8	51.78	50.27	44.54	45.05	42.54	44.01	44.44	41.84	43.52	42.4	104.8	113.91	146.77
HORVU.MOREX.r3.1HG0022460	TPM	234.64	226.74	243.18	162.22	145.65	128.78	166.7	156.03	162.3	180.59	183.41	191.83	169.58	171.39	176.87	159.71	181.58	189.49	108.39	167.11	144.03
HORVU.MOREX.r3.1HG0022490	TPM	15.55	11.78	13.41	20.3	14.46	15.04	12.9	13.52	12.89	12.19	12.24	14.39	13.2	14.91	14.97	11.42	11.8	17.43	2.32	4.66	3.17
HORVU.MOREX.r3.1HG0022500	TPM	0.2	0.33	0.23	0.94	0.46	0.55	0.34	0.32	0.5	0.96	0.35	0.48	0.26	0.52	0.38	0.29	0.29	0.58	0.05	0.11	0.1
HORVU.MOREX.r3.1HG0022530	TPM	2.46	1.6	2.7	1.85	3.38	7.2	0.94	1.26	0.91	1.3	0.69	0.56	1.59	1.6	1.09	0.55	1.21	1.4	0.55	0.81	0.48
HORVU.MOREX.r3.1HG0022540	TPM	0	0	0	0	0	0	0	0	0	0	0	0	0	0	0	0	0	0	0.09	0.28	0.14
HORVU.MOREX.r3.1HG0022550	TPM	0	0	0	0	0.12	0.11	0	0	0	0	0	0	0	0	0	0.06	0	0	0	0.15	0
HORVU.MOREX.r3.1HG0022560	TPM	0.07	0.07	0	0	0	0	0.06	0	0	0.06	0	0.12	0	0.06	0	0.06	0.06	0	0.05	0	0
HORVU.MOREX.r3.1HG0022570	TPM	5.62	5.86	6.29	4.62	4.12	7.8	5.03	3.93	3.66	3.4	3.57	2.68	3.95	5.53	3.5	5.49	4.36	2.33	3.45	2.77	2.39
HORVU.MOREX.r3.1HG0022580	TPM	0	0	0	0	0	0	0	0	0	0	0	0.15	0	0	0.14	0	0	0	0.12	0.18	0.36
HORVU.MOREX.r3.1HG0022660	TPM	33.19	35.2	31.37	73.31	55.46	68.98	116.6	120.28	113.14	113.67	112.79	114.85	113.73	105.81	106.39	108.94	99.31	85.38	40.68	60.96	51.25
HORVU.MOREX.r3.1HG0022680	TPM	35.27	26	31.25	50.09	44.25	35.41	40.8	38.1	35.47	28.93	26.18	31.76	27.45	28.87	26.96	22.46	23.07	30.24	6.68	15.25	14.08
HORVU.MOREX.r3.1HG0022700	TPM	0	0	0	0	0	0	0	0	0.05	0	0	0	0.05	0	0	0	0	0	0	0	0
HORVU.MOREX.r3.1HG0022730	TPM	0.56	1.48	0.63	0.65	0.79	0.27	6.55	6.76	7.43	9.83	13	9.92	7.13	5.37	6.99	6.93	8.69	6.12	7.81	15.54	8.18
HORVU.MOREX.r3.1HG0022740	TPM	0	0	0	0	0	0	0	0	0	0	0	0	0	0	0	0	0	0	0	0	0
HORVU.MOREX.r3.1HG0022750	TPM	0	0	0	0	0	0.29	1	0.7	0.65	0.4	1.21	0.75	1.52	1.37	1.58	1.44	2.21	2.01	4.61	3.62	2.62
HORVU.MOREX.r3.1HG0022760	TPM	0.12	0.33	0	0.35	0.28	0.3	1.65	1.43	1.54	1.63	1.28	1.7	0.91	1.6	1.25	0.63	1.56	0.98	0	0.03	0.33
HORVU.MOREX.r3.1HG0022780	TPM	504.39	823.19	591.98	224.91	323.96	340.99	184.11	141.6	122	206.29	165.53	131.44	196.83	162.78	116.06	306.06	270.91	166.11	581.6	469.41	543.79
HORVU.MOREX.r3.1HG0022790	TPM	0.14	0.15	0	0	0.12	0.12	0	0	0	0	0	0	0	0	0	0	0	1.98	0	0	0
HORVU.MOREX.r3.1HG0022860	TPM	19.97	16.82	16.52	22.13	18.6	19.67	19.97	18.86	19.73	19.83	19.33	20.4	19.15	17.77	19.16	17.21	19.46	19.44	7.31	9.95	9.75
HORVU.MOREX.r3.1HG0022870	TPM	0	0	0	0	0.12	0.17	0.06	0.18	0	0.06	0.06	0	0	0	0.12	0	0	0	0	0.15	0.31
HORVU.MOREX.r3.1HG0022890	TPM	0	0.04	0	0	0	0	0	0	0	0	0	0	0	0	0	0	0	0	0	0	0
HORVU.MOREX.r3.1HG0022910	TPM	3.24	2.38	2.58	10.23	7.49	8.36	5	5.37	5.81	6.86	4.47	6.8	5.51	4.09	4.97	4.31	4.21	5.12	0.35	0.63	0.32
HORVU.MOREX.r3.1HG0022990	TPM	1.04	1.14	1.3	2.39	1.6	1.76	1.5	1.23	1.53	0.96	1.03	1.51	0.81	1.4	1.32	0.69	1.17	1.72	1.54	1.11	1.85
HORVU.MOREX.r3.1HG0023010	TPM	0	0	0	0.04	0	0.03	1.88	0.91	0.06	3.11	4.37	5.63	3.74	5.56	4.78	2.59	3.6	4.5	0	0	0
HORVU.MOREX.r3.1HG0023130	TPM	0	0	0	0	0	0	0	0	0	0	0	0	0	0	0	0	0	0	0	0	0
HORVU.MOREX.r3.1HG0023140	TPM	1.51	1.79	1.07	1.2	1.23	1.16	1.15	0.99	0.77	1.11	1.19	1.04	0.59	1.07	1.14	0.97	0.78	1.13	0.38	0.7	0.58
HORVU.MOREX.r3.1HG0023150	TPM	1.92	0.02	0	0.15	0.02	0.02	0.12	0.1	0.02	0	0.02	0	0	0.02	0.02	0.02	0	0	0	0	0.05
HORVU.MOREX.r3.1HG0023200	TPM	0.63	0.21	0.1	0.14	0	0.34	0	0	0	0.09	0	0.09	0	0.18	0.09	0.08	0	0.15	0.31	0.11	0.34
HORVU.MOREX.r3.1HG0023210	TPM	16.4	11.29	14.56	20.67	21.1	16.17	18.85	16.98	19.04	16.58	20.39	20.18	20.61	21.61	21.59	16.27	20.87	26.93	4.62	6.33	9.27
HORVU.MOREX.r3.1HG0023220	TPM	0.25	0	0	0	0.26	1.35	0.45	0	0.42	0	0.57	0.91	0.38	1.35	0	0	0.28	0	0.46	0.94	0
HORVU.MOREX.r3.1HG0023230	TPM	132.68	162.92	151.67	94.09	93.87	88.44	79.69	84.45	85.51	86.42	79.73	79.07	76.29	75.59	79.27	71.1	78.13	71.12	87.84	112.62	113.38
HORVU.MOREX.r3.1HG0023240	TPM	0	0	0	0	0	0	0	0	0	0	0	0	0	0	0	0	0	0	0	0	0
HORVU.MOREX.r3.1HG0023250	TPM	0	0	0	0	0	0	0	0	0	0	0	0	0	0	0	0	0	0	0	0	0
HORVU.MOREX.r3.1HG0023300	TPM	0	0	0	0	0	0	0	0	0	0	0	0	0	0	0	0	0	0	0	0	0
HORVU.MOREX.r3.1HG0023370	TPM	122.11	68.67	87.24	183.12	136.56	137.51	137.53	128.26	138.44	125.33	114.71	131.75	109.71	111.52	119.22	92.97	96.03	132.51	19.02	45.74	34.65
HORVU.MOREX.r3.1HG0023420	TPM	2.52	1.17	2.45	3.21	1.31	1.17	1.49	1.2	1.3	0.59	0.7	0.85	1.3	1.15	1.08	1.53	1.1	1.5	0.17	1.28	0.91
HORVU.MOREX.r3.1HG0023540	TPM	78.03	86.63	80.3	58.08	56.11	50.99	37.86	34.06	36.11	42.23	41.28	38.28	38.18	38.52	35.5	44.45	44.05	52.97	34.03	35.82	56.25
HORVU.MOREX.r3.1HG0023550	TPM	0	0	0	0	0	0.08	0	0	0	0	0	0	0	0	0	0	0	0	0	0	0
HORVU.MOREX.r3.1HG0023580	TPM	0	0	0	0	0	0	0	0	0.08	0.05	0.05	0	0	0	0.09	0.05	0	0	0	0	0
HORVU.MOREX.r3.1HG0023590	TPM	0	0	0	0	0	0	0	0	0	0	0	0	0	0	0	0	0	0	0	0	0
HORVU.MOREX.r3.1HG0023600	TPM	0	0	0	0	0	0	0	0	0	0	0	0	0	0	0	0	0	0	0	0	0
HORVU.MOREX.r3.1HG0023610	TPM	7.88	8.28	9.33	23.99	32.97	87.48	33.85	45.14	19.37	29.55	26.25	31.26	22.87	22.16	26.06	32.48	22.57	15.97	8.64	13.77	5.14
HORVU.MOREX.r3.1HG0023620	TPM	12.28	7.18	6.42	49.89	53.69	104.04	64.03	71.17	47.45	51.81	55.63	59.27	44.33	38.62	45.53	45.52	37.18	24.73	9.13	14.2	4.41
HORVU.MOREX.r3.1HG0023630	TPM	0	0	0	0	0	0	0	0	0	0	0	0	0	0	0	0	0	0	0	0	0
HORVU.MOREX.r3.1HG0023640	TPM	0.89	1.82	1.2	6.66	3.29	5.44	7.79	8.5	7.77	9.52	8	8.13	11.27	12.21	11.54	11.06	12.21	12.49	0.43	0.2	0.31
HORVU.MOREX.r3.1HG0023650	TPM	65.35	56.23	65.93	81.94	71.87	67.35	62.98	61.29	65.17	56.24	56.56	57.71	50.98	50.89	54.68	48.53	47.58	50.86	44.91	58.51	59.4
HORVU.MOREX.r3.1HG0023680	TPM	8.77	6.46	7.88	6.61	7.25	6.2	7.67	7.18	8.33	6.93	8.18	6.87	6.91	7.24	7.7	7.06	6.32	7.68	6.33	5.91	5.03
HORVU.MOREX.r3.1HG0023710	TPM	4.29	3.37	5.09	4.2	3.2	3.94	4.68	3.66	4.33	4	4.25	3.51	4.61	5.2	4.07	5.82	5.1	3.42	2.9	3.75	3.86
HORVU.MOREX.r3.1HG0023740	TPM	2.91	4.66	3.72	5.18	5.69	5.39	5.51	3.91	3.87	6.8	5.6	7.43	7.66	7.09	8.38	6.53	8.29	6.11	0.62	1.13	1.4
HORVU.MOREX.r3.1HG0023760	TPM	0.24	0	0	0	0	0.19	0	0	0	0	0	0	0	0	0	0	0	0	0	0	0.13
HORVU.MOREX.r3.1HG0023770	TPM	0	0	0	0	0	0	0	0	0	0	0	0	0	0	0	0	0	0	0	0	0
HORVU.MOREX.r3.1HG0023810	TPM	0	0.33	0	0	0	0	0	0	0	0	0	0	0	0	0	0.13	0	0	0	0	0
HORVU.MOREX.r3.1HG0023820	TPM	0	0	0	0	0	0	0	0	0	0	0	0	0	0	0	0	0	0	0	0	0
HORVU.MOREX.r3.1HG0023840	TPM	50.14	40.23	47.01	32.6	32.01	31.41	29.7	29.97	30.69	22.57	16.78	21.64	22.17	27.27	24.97	18.11	18.31	19.7	22.91	37.24	31.99
HORVU.MOREX.r3.1HG0023870	TPM	1.29	2.12	2.39	1.54	3.17	3.69	6.14	8.31	6.3	9.66	8.15	8.31	12.6	12.01	11.15	17.59	19.05	16.87	8.52	7.15	7.41
HORVU.MOREX.r3.1HG0023920	TPM	0	0	0	0	0	0	0	0	0	0	0	0	0	0	0	0	0	0	0	0	0
HORVU.MOREX.r3.1HG0023930	TPM	0	0	0	0	0	0	0	0	0	0	0	0	0	0	0	0	0	0	0	0	0
HORVU.MOREX.r3.1HG0023940	TPM	73.27	49.26	58	61.41	69.02	52.22	38.3	34.48	40.94	30.7	25.36	30.29	23.06	24.74	22.53	18.32	19.78	24.63	21.73	29.54	31.62
HORVU.MOREX.r3.1HG0023950	TPM	128.95	124.13	137.16	114.37	103.92	91.22	122.62	113.93	121.03	134.8	122.52	128.51	101.49	111.02	104.49	102.61	110.85	128.95	172.95	177.82	204.68
HORVU.MOREX.r3.1HG0023970	TPM	19.14	27.78	20.52	15.61	12.82	22.59	9.08	8.73	10.29	10.59	11.73	8.11	8.26	11.67	10.83	13.44	9.13	14.51	9.74	7.24	14.33
HORVU.MOREX.r3.1HG0023990	TPM	420.39	369.59	391.4	346.91	353.88	308.87	213.46	205.09	220.98	195.09	183.42	199.23	163.38	170.25	175.22	161.36	160.04	162.18	185.54	251.74	270.1
HORVU.MOREX.r3.1HG0024020	TPM	18.96	17.55	17.6	22.71	25.24	21.81	23.48	21.85	26.15	23.35	26.96	23.49	27.64	27.12	26.21	22.75	22.96	27.52	12.88	14.98	20.78
HORVU.MOREX.r3.1HG0024030	TPM	9.92	10.74	10.31	8.52	7.46	6.99	9.98	10.54	9.13	11.11	13.4	12.56	13.82	14.45	14.77	18.62	15.29	12.59	10.05	13.37	13.02
HORVU.MOREX.r3.1HG0024040	TPM	697.05	580.29	623.33	872.84	728.07	732	922.96	890.17	892.56	834.76	812.59	872.61	677.55	735.68	723.45	625.69	662.26	788.54	504.51	755.17	587.68
HORVU.MOREX.r3.1HG0024050	TPM	0.09	0.09	0	0.23	0.15	0.45	0.15	0.31	0.41	0.61	0.46	0.73	0.58	1.53	0.23	0.22	1.61	0.38	0	0	0
HORVU.MOREX.r3.1HG0024060	TPM	0	0	0	0	0	0	0	0	0	0	0	0	0	0	0	0	0	0	0	0	0
HORVU.MOREX.r3.1HG0024070	TPM	0	0	0	0	0	0	0	0	0	0	0	0	0	0	0	0	0	0	0	0	0
HORVU.MOREX.r3.1HG0024090	TPM	9.84	9.56	10.11	4.47	6.19	5.44	5.19	5.67	6.08	5.11	7.27	6.48	8.6	8.16	8.07	9.82	9.51	9.28	13.89	10.77	15.08
HORVU.MOREX.r3.1HG0024140	TPM	3.64	0.86	0.75	5.45	4.38	7.48	3.38	3.67	2.6	1.82	2.37	2.36	2.64	2.2	3.29	2.56	2.17	1.55	0.02	0.4	0.02
HORVU.MOREX.r3.1HG0024150	TPM	0	0	0	0	0	0	0	0	0	0	0	0	0	0	0	0	0	0	0	0	0
HORVU.MOREX.r3.1HG0024200	TPM	0	0	0	0	0	0	0	0	0	0	0	0	0	0	0	0	0	0	0	0	0
HORVU.MOREX.r3.1HG0024210	TPM	50.71	21.45	33.19	83.19	77.2	63.61	61.51	66.88	76.39	47.31	41.06	49.16	33.67	38.14	33.64	26.86	30.54	34.01	9.28	26.91	12.11
HORVU.MOREX.r3.1HG0024220	TPM	0	0.15	0.07	0	0	0	0	0	0	0.06	0	0	0.07	0	0	0	0	0	0	0	0
HORVU.MOREX.r3.1HG0024230	TPM	32.97	15.18	22.11	51.47	46.18	39.04	40.88	39.18	40.18	36	37.05	42.23	36.35	34.41	36.24	31.25	32.67	39.88	4.3	12.28	6.83
HORVU.MOREX.r3.1HG0024260	TPM	3.3	4.57	3.04	1.11	1.89	2.4	2.88	3.19	2.5	2.57	1.6	3.84	2.5	4.85	5.41	1.8	4.64	7.47	0.63	1.67	0.75
HORVU.MOREX.r3.1HG0024280	TPM	78.38	55.7	62.45	164.08	126.45	122.31	185.4	169.38	168.39	174	190.29	207.9	169.41	166.46	170.13	144.57	140.82	170.07	31.27	61.19	47.22
HORVU.MOREX.r3.1HG0024290	TPM	7.71	4.74	5.66	12.28	9.83	9.82	12.6	10.62	11.68	10.55	11.38	13.01	12.08	13.09	13.14	10.88	11.29	16.43	2.97	3.19	3.03
HORVU.MOREX.r3.1HG0024310	TPM	0.14	0	0	0	0	0.11	0	0	0	0	0	0	0	0	0	0	0	0	0	0.15	0
HORVU.MOREX.r3.1HG0024340	TPM	0	0.09	0	0.03	0.02	0.02	0.02	0.02	0.04	0.02	0	0	0	0.02	0	0.02	0.06	0.03	0.05	0.13	0.18
HORVU.MOREX.r3.1HG0024360	TPM	0	0	0	0	0.03	0	0	0.03	0.03	0	0	0	0	0	0	0	0	0.05	0	0	0
HORVU.MOREX.r3.1HG0024370	TPM	0	0	0	0	0	0	0	0	0	0	0	0	0	0	0.02	0	0	0	0	0	0
HORVU.MOREX.r3.1HG0024380	TPM	7.07	2.51	3.97	36.48	29.17	33.43	11.43	9.89	13.28	6.08	6.13	5.68	5.34	4.49	5.48	4.68	3.4	5.22	0.28	1.42	0.58
HORVU.MOREX.r3.1HG0024440	TPM	74.74	157.74	103.29	35.74	51.8	43.18	16.43	17.96	18.3	23.21	15.21	20.73	20.45	25.36	19.24	26.22	25.97	12.83	33.34	13.96	37.78
HORVU.MOREX.r3.1HG0024500	TPM	25.58	22.81	24.26	19.7	24.23	25.83	29.71	27.66	29.43	34.87	36.84	35.16	36.72	37.62	39.41	41.1	37.66	34.61	28.03	31.42	27.8
HORVU.MOREX.r3.1HG0024510	TPM	100.67	152.44	131.22	62.65	65.96	63.76	93.79	92	88.36	120.86	108.27	114.7	152.26	135.92	126.97	149.23	174.46	108.37	361.74	232.91	256.81
HORVU.MOREX.r3.1HG0024560	TPM	5.79	5.06	5.26	11.92	7.48	8.67	15.01	15.4	14.41	14.54	16.85	19.04	15.76	15.56	18.43	16.85	13.27	15.65	3.3	3.16	3.7
HORVU.MOREX.r3.1HG0024570	TPM	0.63	0.62	0.7	4.84	2.19	3	0.22	0.53	0.41	0.37	0.15	0	0.32	0.16	0.22	0.22	0.08	0.25	0	0.1	0.1
HORVU.MOREX.r3.1HG0024600	TPM	0	0.03	0.12	0	0	0.02	0	0	0	0	0	0	0	0	0	0	0	0	0.01	0	0.02
HORVU.MOREX.r3.1HG0024650	TPM	0	0	0	0	0	0	0.19	0	0.21	0	0	0	0	0	0.19	0	0	0	0	0	0
HORVU.MOREX.r3.1HG0024670	TPM	0.76	0.84	1.18	1.42	1.23	1.15	1.93	2.2	2.05	1.29	0.47	0.9	1.19	1.19	1.5	0.81	0.59	0.35	0.04	0.22	0.17
HORVU.MOREX.r3.1HG0024690	TPM	39.07	29.45	33.12	62.54	43.53	50.77	43.13	38.46	42.87	42.47	42.61	50.46	43.49	51.86	45.91	36.4	45.98	60.39	11.31	17.06	17.13
HORVU.MOREX.r3.1HG0024710	TPM	140.96	93.97	106.24	139.21	145.4	124.85	118.24	109.5	115.63	111.79	120.13	118.48	104.11	106.63	99.21	89.55	101.5	104.79	70.39	96.38	83.62
HORVU.MOREX.r3.1HG0024730	TPM	27.29	22.78	24.6	25.31	33.73	46.1	20.86	19.8	16.22	21.77	13.21	17.04	21.76	23.45	18.18	21.89	21.39	18	20.11	21.92	20.27
HORVU.MOREX.r3.1HG0024740	TPM	36.34	31.63	31.72	42.35	48.48	43.29	37.44	38.04	35.71	45.03	35.97	38.02	38.94	39.81	43.47	43.09	42.82	41.01	14.38	25.09	21.24
HORVU.MOREX.r3.1HG0024800	TPM	0.05	0.09	0.14	0.43	0.36	0.31	0.24	0.32	0.43	0.34	0.26	0.38	0.17	0.38	0.36	0.25	0.6	0.44	0.05	0.05	0.16
HORVU.MOREX.r3.1HG0024860	TPM	0.06	0.06	0	0	0.21	0.05	0.05	0.05	0.17	0	0.16	0.17	0	0	0.05	0	0.05	0.09	0.05	0.2	0.2
HORVU.MOREX.r3.1HG0024880	TPM	244.66	212.25	241.94	375.9	306.15	281.4	444.25	430.9	412.38	437.9	416.28	427.71	357.64	355.01	351.17	278.51	331.43	355.36	152.96	228.36	204.08
HORVU.MOREX.r3.1HG0024900	TPM	38.31	25.97	33.16	44.6	38.08	44.78	37.05	37.58	40.84	35.64	37.61	36.7	36.4	37.81	36.75	34.93	32.47	31.5	34.45	49.76	52.46
HORVU.MOREX.r3.1HG0024910	TPM	849.18	815.82	780.55	1143.47	1351.37	1341.67	1231.97	1336.02	1119.93	929.33	889.4	907.7	912.27	937.28	934.41	949.02	790.76	596.99	924.02	994.63	789.91
HORVU.MOREX.r3.1HG0024920	TPM	0	0	0	0	0	0	0	0	0	0	0	0	0	0	0	0	0	0	0	0	0
HORVU.MOREX.r3.1HG0024930	TPM	0	0	0	0	0	0	0	0	0	0	0	0	0	0	0	0	0	0	0	0	0
HORVU.MOREX.r3.1HG0024980	TPM	1.77	1.18	1.36	1.75	1.31	1.54	3.56	4.02	3.92	4.4	7.27	7.04	5.66	5.81	7.37	6.18	5.5	7.79	0.72	1.1	2.1
HORVU.MOREX.r3.1HG0024990	TPM	0	0	0	0	0	0	0	0	0	0	0	0	0	0	0	0	0	0	0	0	0
HORVU.MOREX.r3.1HG0025010	TPM	0	0	0	0	0.16	0	0	0	0	0	0	0	0	0	0	0	0	0	0	0.21	0.83
HORVU.MOREX.r3.1HG0025050	TPM	0.56	0.2	0.3	5.71	5.93	9.24	1.94	2.59	4.62	2.8	0.89	1.57	1.74	1.42	0.96	0.73	0.72	0.49	0	0.22	0
HORVU.MOREX.r3.1HG0025060	TPM	27.24	20.64	23.32	47.31	32.21	34.4	42.85	40.14	48.34	40.9	42.35	45.01	47.06	50.71	45.26	40.59	44.05	60.23	15.75	21.88	24.59
HORVU.MOREX.r3.1HG0025100	TPM	0	0	0.13	0	0	0.11	0.33	0.22	0.35	0.11	0.22	0.23	0.59	0.57	0.32	0.1	0.33	1.46	0	0	0
HORVU.MOREX.r3.1HG0025110	TPM	0	0	0	0	0	0	0	0	0	0	0	0	0	0	0	0	0	0	0	0	0
HORVU.MOREX.r3.1HG0025150	TPM	0	0	0	0	0	0	0	0.01	0	0	0	0.02	0.02	0	0	0	0	0	0	0	0
HORVU.MOREX.r3.1HG0025200	TPM	0	0	0	0	0	0	0	0	0	0	0	0	0	0	0	0	0	0	0	0	0
HORVU.MOREX.r3.1HG0025230	TPM	0	0	0	0	0	0	0	0	0	0	0	0	0	0	0	0	0	0	0	0	0
HORVU.MOREX.r3.1HG0025320	TPM	17.4	22.99	17.03	21.42	21.66	19.15	13.85	11.63	11.89	11.87	9.4	10.64	12.8	10.13	10.19	10.88	12.4	11.05	2.12	4.13	3.41
HORVU.MOREX.r3.1HG0025340	TPM	0.33	0.32	0	0	0.28	0.54	0.27	0.28	0.3	0.27	0.83	0.29	0.6	2.02	0	0	1.93	1.37	0.24	0.35	1.43
HORVU.MOREX.r3.1HG0025350	TPM	29.1	24.68	33.08	28.08	33.04	21.31	14.17	13.04	16.79	12.16	12.34	12.77	9.41	8.55	10.12	9.84	9.07	8.05	18.57	23.92	25.94
HORVU.MOREX.r3.1HG0025440	TPM	23.02	19.09	22.75	24.26	23.91	23.94	21.98	19.69	21.14	21.06	22.66	24.5	21.14	21.67	25.77	28.09	27.14	24.22	30.06	33.88	25.98
HORVU.MOREX.r3.1HG0025460	TPM	0	0.11	0	0	0	0.09	0	0	0	0	0	0	0	0	0	0	0	0	0	0	0
HORVU.MOREX.r3.1HG0025500	TPM	172.82	134.62	165.73	212.67	192.4	161.7	162.42	155.64	158.59	144.45	154.91	167.73	157.69	158.83	157.18	153.41	149.54	180.16	40.7	80.51	60.44
HORVU.MOREX.r3.1HG0025510	TPM	4.43	7.14	4.66	2.79	1.24	3.31	1.4	0.65	0.82	1.74	0.41	0.87	9.38	4.3	2.14	4.2	4.58	2.45	6.6	11.92	5.2
HORVU.MOREX.r3.1HG0025520	TPM	71.22	74.58	69.25	57.34	48.2	50.74	39.98	40.77	47.43	41.26	38.95	37.46	39.29	37.03	40.59	41.59	41.48	42.44	37.88	55.86	70.88
HORVU.MOREX.r3.1HG0025530	TPM	0	0	0.08	0	0	0	0	0	0	0	0	0	0	0	0	0	0	0	0.06	0.74	0.28
HORVU.MOREX.r3.1HG0025550	TPM	69.67	70.68	72.42	76.29	75.12	78.42	71.51	69.87	72.64	74.95	74.31	73.1	71.85	73.34	78.5	73.04	70.4	71.88	94.17	92.45	101.86
HORVU.MOREX.r3.1HG0025580	TPM	0	0	0	0.22	0	0	0	0	0	0	0	0.1	0	0	0	0	0.1	0	0	0	0.28
HORVU.MOREX.r3.1HG0025590	TPM	0	0.31	0	0	0	0	0	0	0	0	0	0	0	0	0	0	0	0	0	0	0
HORVU.MOREX.r3.1HG0025600	TPM	0.03	0	0.03	0	0	0.02	0	0	0	0	0	0	0	0	0	0	0.02	1.29	0	0	0
HORVU.MOREX.r3.1HG0025620	TPM	171.65	184.03	165.14	203.78	197.34	198.82	190.08	192.53	225.28	170.04	166.36	166.09	149.01	153.01	140.77	130.22	148.54	160.92	121.94	153.18	188.04
HORVU.MOREX.r3.1HG0025660	TPM	7.06	2.23	1.6	9.35	8.64	9.25	1.23	0.71	1.67	1.35	0.22	0.8	0.29	0.23	0.35	2.74	0.31	1.25	0	0.17	3.98
HORVU.MOREX.r3.1HG0025690	TPM	0	0	0	0	0	0	0	0	0	0	0	0	0	0	0	0	0	0	0	0	0
HORVU.MOREX.r3.1HG0025720	TPM	8.91	9.4	8.53	33.19	11.96	20.91	43.94	45.68	50.04	36.5	40.87	41.02	41.11	39.89	44.57	32.26	32.32	41.64	4.16	10.85	8.02
HORVU.MOREX.r3.1HG0025730	TPM	0.25	0	0.12	0.16	0.21	0.3	0	0.62	0	0.2	0.1	0	0	0.64	0.2	0.59	0	0.17	0.44	1.45	0
HORVU.MOREX.r3.1HG0025750	TPM	6.76	8.69	8.31	5.9	6	6.95	7.98	8.03	9.83	10.02	9.99	9.84	11.99	12.59	11.85	13.33	14.62	13.91	10.21	11.17	12.37
HORVU.MOREX.r3.1HG0025790	TPM	5.73	5.32	6.21	7.09	6.04	5.69	5.32	4.34	6.44	4.01	4.65	4.4	5.32	6.22	5.78	5.1	5.44	7.13	4.57	4.01	6.85
HORVU.MOREX.r3.1HG0025810	TPM	0	0	0	0	0	0	0	0	0	0	0	0	0	0	0	0	0	0	0	0	0
HORVU.MOREX.r3.1HG0025820	TPM	0	0	0	0	0	0	0	0	0	0	0	0	0	0	0	0	0	0	0	0	0
HORVU.MOREX.r3.1HG0025840	TPM	2.52	2.33	2.82	6.83	5.62	5.76	6.39	5.12	7.82	6.66	5.47	7.59	5.92	6.25	7.23	4.14	5.66	7.96	0.73	1.17	1.71
HORVU.MOREX.r3.1HG0025870	TPM	6.18	5.96	5.69	3.73	7.58	10.41	3.89	5.67	5.87	1.62	2.39	2.88	3	2.91	5.68	5.94	1.76	1.89	0.88	2.4	0.59
HORVU.MOREX.r3.1HG0025880	TPM	16.68	15.86	16.68	12.34	15.55	12.49	13.13	11.2	13.36	11.45	15.11	13.66	13.14	15	14.55	16.35	14.59	16.87	21.44	17.61	29.77
HORVU.MOREX.r3.1HG0025890	TPM	1.07	3.12	1.61	0.99	1.63	1.18	0.16	0.57	0.26	0.56	0.32	0.34	0.26	0.51	0.32	0.31	0.4	0.67	2.24	1.97	1.37
HORVU.MOREX.r3.1HG0025900	TPM	5.64	3.73	2.66	7.35	7.53	13.52	7.64	7.38	7.15	6.78	7.87	6.86	9.22	10.37	8.7	10.79	9.51	7.42	0.83	1.69	1.65
HORVU.MOREX.r3.1HG0025910	TPM	0	0	0	0	0	0	0.2	0	0	0	0	0	0	0	0	0	0	0	0.09	0	0
HORVU.MOREX.r3.1HG0025960	TPM	9.35	8.33	9.59	11.71	11.69	10.54	21.92	21.19	21.16	25.28	26.57	28.16	27.72	29.28	29.45	29.58	26.66	26.25	10.18	15.17	16.75
HORVU.MOREX.r3.1HG0025970	TPM	0	0	0	0	0	0	0	0	0	0	0	0	0	0	0	0	0	0	0	0	0
HORVU.MOREX.r3.1HG0025980	TPM	36.66	24.07	27.93	56.8	50.1	48.62	53.63	46.32	47.69	40.93	43.75	48.2	39.07	42.03	38.03	32.43	35.09	48.37	26.35	35.72	35.1
HORVU.MOREX.r3.1HG0025990	TPM	113.06	91.83	80.88	76.51	83.97	64.12	38.73	34.65	38.53	26.81	32.13	30.55	27.28	27.63	27.23	21.92	23.01	33.29	16.26	27.8	21.68
HORVU.MOREX.r3.1HG0026010	TPM	71.02	70.35	87.13	57.86	70.63	52.67	33.78	30.32	39.1	27.52	29.49	32.78	27.14	28.37	29.16	22.73	21.4	29.11	14.52	21.58	19.96
HORVU.MOREX.r3.1HG0026020	TPM	0	0	0	0	0	0	0	0	0	0	0	0	0	0	0	0	0	0	0	0	0
HORVU.MOREX.r3.1HG0026030	TPM	25.61	29.05	29.79	23.63	19.24	21.65	29.08	31.61	31.51	46.33	39.3	49.65	44.68	47.6	44.99	44.83	62.6	56.48	49.55	48.49	48.59
HORVU.MOREX.r3.1HG0026070	TPM	3089.93	3868.82	3426.45	2879.22	2819.1	2564.64	1964.37	2033.97	2012.28	1756.24	1805.35	1801.53	1560.56	1520.29	1516.37	1569.79	1415.39	1185.98	1823.87	2275.32	2385.42
HORVU.MOREX.r3.1HG0026080	TPM	37.19	43.17	45.52	30.5	28.18	26.08	29.5	28.96	35.34	33.74	37.43	31.74	36.9	38.47	40.74	34.74	38.42	36.25	41.24	51.87	50.99
HORVU.MOREX.r3.1HG0026100	TPM	4.28	4.39	5.04	6.33	4.81	5.83	7.75	9.45	11.28	10.89	13.34	11.76	14.56	14.62	14.75	12.94	15.47	14.48	4.85	4.86	6.85
HORVU.MOREX.r3.1HG0026110	TPM	0	0	0	0	0	0	0	0	0	0	0	0	0	0	0	0	0	0	0	0	0
HORVU.MOREX.r3.1HG0026140	TPM	0	0	0	0	0	0.07	0	0	0	0	0	0	0.08	0	0	0	0.13	0	0	0	0
HORVU.MOREX.r3.1HG0026170	TPM	88.71	91.88	86.93	93.21	81.29	77.04	86.13	81.54	78.95	84.87	82.21	80.71	74.85	79.92	86.3	84.72	85.31	75.4	84.48	77.45	103.99
HORVU.MOREX.r3.1HG0026180	TPM	13.99	13.98	15.94	26.58	18.89	12.49	31.21	23.98	25.87	19.98	32.09	23.88	27.72	21.49	23.28	18.21	26.53	18.43	25.36	29.95	30.38
HORVU.MOREX.r3.1HG0026190	TPM	20.37	8.93	12.94	14.89	17.84	22.53	11.27	8.51	9.44	4.01	7.18	8.75	9.84	8.13	7.27	9.16	4.81	3.28	2.56	1.74	4.01
HORVU.MOREX.r3.1HG0026220	TPM	0	0	0	0	0	0	0	0	0.11	0	0	0	0	0.13	0.12	0	0	0	0	0	0
HORVU.MOREX.r3.1HG0026230	TPM	0	0	0	0	0	0	0	0	0	0	0	0	0	0	0	0	0	0	0	0	0
HORVU.MOREX.r3.1HG0026240	TPM	39.98	30.69	17.34	26.8	30.77	20.86	10.99	9.52	12.91	19.58	11.1	17.76	11.46	18.21	9.89	10.45	17.89	20.73	4.25	8.37	14.49
HORVU.MOREX.r3.1HG0026280	TPM	0	0	0	0	0	0	0	0	0	0	0	0	0	0	0	0	0	0	0	0	0
HORVU.MOREX.r3.1HG0026300	TPM	0	0	0	0	0	0	0	0	0	0	0	0	0	0	0	0	0	0	0	0	0
HORVU.MOREX.r3.1HG0026350	TPM	0	0	0	0	0	0	0	0	0	0	0	0	0	0	0	0	0	0	0	0	0
HORVU.MOREX.r3.1HG0026380	TPM	0	0	0	0	0	0	0	0	0	0	0	0	0	0	0	0	0	0	0	0	0
HORVU.MOREX.r3.1HG0026390	TPM	0.15	0	0.09	0.25	0.2	0.2	0.2	0.08	0	0.04	0.08	0.13	0.04	0	0.04	0.04	0	0.13	0	0.05	0
HORVU.MOREX.r3.1HG0026420	TPM	0.12	0.08	0.08	0.05	0.1	0.06	0.1	0.03	0	0.16	0.13	0.11	0.11	0.17	0.07	0.13	0.2	0.06	0.86	0.81	0.6
HORVU.MOREX.r3.1HG0026430	TPM	19.17	17.84	14.82	18.62	18.41	16.56	13.43	12.86	13.04	14.82	13.98	14.23	13.91	13.41	12.6	13.74	13.95	10.14	4.94	8.48	9.61
HORVU.MOREX.r3.1HG0026440	TPM	0	0	0	0	0.12	0	0	0	0	0.06	0.06	0	0	0	0	0	0	0	0	0	0
HORVU.MOREX.r3.1HG0026470	TPM	12.2	15.52	11.11	6.36	9.43	12.27	2.7	3.3	2.48	1.82	1.01	1	1.63	2.26	1.4	2.18	1.45	1.04	3.2	4.31	1.35
HORVU.MOREX.r3.1HG0026520	TPM	0	0	0	0	0	0	0	0	0	0	0	0	0	0	0	0	0	0	0	0	0
HORVU.MOREX.r3.1HG0026530	TPM	1.03	1.05	1.85	0.95	0.59	0.61	0.71	0.39	0.11	0.3	0.12	0.41	0.67	0.66	0.78	0.39	0.82	1.32	1.76	1.04	1.35
HORVU.MOREX.r3.1HG0026570	TPM	0	0.03	0.17	0.04	0	0.06	0.19	0.07	0.1	0	0.1	0.13	0.05	0.08	0.04	0.05	0.02	0	0.15	0.06	0
HORVU.MOREX.r3.1HG0026580	TPM	0	1.26	0.47	0	0	0	1.42	0	0.44	0	0.49	0	0.77	0.75	1.03	0	0	0.54	0.62	0.46	2.21
HORVU.MOREX.r3.1HG0026590	TPM	0	0.16	0	0	0	0	0.07	0	0	0	0	0.07	0.08	0	0	0	0	0	0	0	0
HORVU.MOREX.r3.1HG0026630	TPM	1.03	1.05	1.85	0.95	0.59	0.61	0.71	0.39	0.11	0.3	0.12	0.41	0.67	0.66	0.78	0.39	0.82	1.32	1.76	1.04	1.35
HORVU.MOREX.r3.1HG0026640	TPM	0	0	0	0	0	0	0	0	0	0.28	0	0	0	0	0	0	0	0	0	0	0
HORVU.MOREX.r3.1HG0026650	TPM	0	0	0	0	0	0	0	0	0	0	0	0	0	0	0	0	0	0	0	0	0
HORVU.MOREX.r3.1HG0026660	TPM	0	0	0	0	0	0	0	0	0	0	0	0	0	0	0	0	0	0	0	0	0
HORVU.MOREX.r3.1HG0026720	TPM	32.33	28.21	22.06	32.54	91.73	94.29	12.49	11.49	13.78	9.3	6.69	7.66	7.19	6.29	7.73	7.41	4.73	3.75	1.08	2.2	1.94
HORVU.MOREX.r3.1HG0026750	TPM	28.45	10.48	16.5	28.34	25.34	24.11	26.61	24.58	25.67	22.54	23.82	23.75	24.02	26.27	26.23	21.11	21.28	24.46	8.92	12.46	8.5
HORVU.MOREX.r3.1HG0026830	TPM	1.11	1.22	0.94	3.74	3.66	4.12	3.05	3.5	2.9	2.59	3.35	3.55	3.87	3.28	3.54	3.03	2.82	1.84	0.19	0.08	0.35
HORVU.MOREX.r3.1HG0026860	TPM	0.3	0	0	0	0.26	2.23	0	0	0.27	0	0	0.27	0	0	0	0	0	0.42	0.22	0.33	0.66
HORVU.MOREX.r3.1HG0026870	TPM	1.52	1.01	0.76	1.71	1.29	1.02	0.46	0.51	1.18	0.85	0.25	0.27	0.64	0.26	0	1.04	0.4	0.28	0.05	1.71	0.03
HORVU.MOREX.r3.1HG0026900	TPM	15.96	12.81	13.95	7.46	8.07	7.28	10.82	10.74	10.14	8.64	10.1	10.33	12.12	13.39	11.64	11.31	13.5	17.85	22.75	21.06	22.55
HORVU.MOREX.r3.1HG0026930	TPM	33.17	31.86	33.58	32.34	33.44	34.18	28.06	26.31	29.87	30.27	29.33	28.77	28.69	30.88	27.72	27.19	28.23	30.76	29.63	26.7	37.35
HORVU.MOREX.r3.1HG0026940	TPM	8.88	6.07	7.69	22.71	19.77	17.19	16.81	15.06	16.22	10.4	11.74	10.51	7.99	8.27	6.93	5.96	6.61	7.34	3.99	5.58	4.59
HORVU.MOREX.r3.1HG0026950	TPM	0.47	1.03	0.66	0.36	0.75	0.97	0.12	0.12	0.15	0.21	0.04	0.06	0.15	0.04	0.08	0.09	0.06	0.03	0.14	0.3	0.28
HORVU.MOREX.r3.1HG0026960	TPM	0	0	0	0	0	0	0	0	0	0	0	0	0	0	0	0	0	0	0	0	0
HORVU.MOREX.r3.1HG0027000	TPM	3.88	4.75	5.63	9.42	7.21	11.05	26.19	23.11	18.01	19.9	23.19	24.47	27.47	23.65	29.89	33.51	32.75	22.73	34.67	24.13	16.53
HORVU.MOREX.r3.1HG0027030	TPM	8.43	6.38	6.86	17.03	15.09	15.21	25.72	28.5	26.06	26.63	28.65	25.89	22.66	23.32	19.33	16.9	24.77	23.29	8.91	14.29	10.12
HORVU.MOREX.r3.1HG0027040	TPM	0	0.21	0.1	0	0	0.26	0.18	0.09	0	0.09	0.09	0.19	0.19	0.09	0.09	0.25	0.18	0	0.08	0.46	0.12
HORVU.MOREX.r3.1HG0027050	TPM	0	0	0	0	0	0	0	0	0	0	0	0	0	0	0	0	0	0	0	0	0
HORVU.MOREX.r3.1HG0027080	TPM	0	0	0	0	0	0	0	0	0	0	0	0	0	0	0	0	0	0	0	0	0
HORVU.MOREX.r3.1HG0027090	TPM	36.49	32.55	43.16	29.72	27.2	23.68	161.87	165.76	158.9	223.22	223.98	172.09	203.4	155.34	147.87	226.9	266.53	169.97	207.71	203.8	320.72
HORVU.MOREX.r3.1HG0027120	TPM	19.89	19.51	28.12	4.28	4.44	7.81	5.11	4.15	5.74	10.23	5.61	5.64	7.01	4.25	3.19	8.6	12.81	6.46	177.02	142.55	137.4
HORVU.MOREX.r3.1HG0027140	TPM	0	0	0	0	0.1	0	0	0	0	0	0	0	0	0	0	0	0.1	0	0	0	0
HORVU.MOREX.r3.1HG0027150	TPM	0	0	0	0	0	0	0	0	0	0	0	0	0	0	0	0	0	0	0	0	0
HORVU.MOREX.r3.1HG0027180	TPM	72.79	78.28	82.35	42.16	44.77	40.79	37.08	34.33	37.09	41.32	43.28	38.71	41.29	39.34	37.61	39.25	44.44	49.01	60.33	80.05	76.88
HORVU.MOREX.r3.1HG0027190	TPM	29.17	26.78	30.31	28.66	27.15	24.55	24.75	22.92	28.13	22.69	23.16	26.41	24.73	24.32	27.06	26.55	24.9	29.38	15.12	14.94	14.33
HORVU.MOREX.r3.1HG0027200	TPM	43.14	49.9	44.67	34.73	60.62	51.98	26.11	27.25	29.4	24.64	17.92	23.31	23.02	27.5	23.13	26.47	23.14	25.27	44.47	61.69	42.3
HORVU.MOREX.r3.1HG0027220	TPM	26.1	21.95	24.08	20.26	22.09	21.94	18.67	19.02	17.29	18.29	18.14	17.96	16.66	17.3	17.72	17.13	15.79	17.46	8.17	12.31	10.8
HORVU.MOREX.r3.1HG0027280	TPM	2.3	0.55	1.03	4.15	4.24	6.48	1.08	1.68	1.37	0.96	1.09	0.94	1.43	0.8	1.39	1.29	1.27	0.98	0.2	0.19	0.27
HORVU.MOREX.r3.1HG0027330	TPM	0.04	0.25	0.25	0.09	0	0	0.21	0.34	0.13	1.28	0.96	1.27	1.1	0.42	0.51	0.56	2.49	1.9	0.59	0.87	0.48
HORVU.MOREX.r3.1HG0027350	TPM	0	0	0	0	0	0	0	0	0	0	0	0	0	0	0	0	0	0	0	0	0
HORVU.MOREX.r3.1HG0027360	TPM	0	0	0	0	0.07	0.07	0.04	0	0.04	0.04	0.11	0.08	0.19	0.26	0.14	0.37	0.14	0.12	0	0	0
HORVU.MOREX.r3.1HG0027380	TPM	6.16	6.52	7.45	4.34	5.04	3.36	2.44	2.05	2.18	1.35	1.59	1.35	1.34	1.66	1.74	1.51	1.03	1.92	0.43	1.16	0.65
HORVU.MOREX.r3.1HG0027400	TPM	2.1	2.1	1.88	3.11	1.93	2.07	3.22	3.12	3.6	3.01	3.2	4.21	3.72	3.19	4.3	3.36	4.92	2.56	0.57	1.37	0.28
HORVU.MOREX.r3.1HG0027460	TPM	8.64	7.43	19.26	7.13	6.39	4.96	5.49	4.68	8.26	3.77	3.84	5.41	7.34	8.45	6.27	4.86	5.1	10.52	0.37	0	0.55
HORVU.MOREX.r3.1HG0027490	TPM	26.58	33.04	22.93	39.02	51.43	53.29	45.22	72.84	65.4	86.77	104.93	108.93	63.58	53.08	77.08	164.09	81.94	102.59	88.57	64.75	93.72
HORVU.MOREX.r3.1HG0027520	TPM	0	0	0	0	0	0	0	0	0	0	0	0	0	0	0	0	0	0	0	0	0
HORVU.MOREX.r3.1HG0027530	TPM	0.02	0.01	0.04	0.14	0.1	0.01	0.06	0.05	0.14	0.15	0.1	0.2	0.06	0.08	0.1	0.12	0.2	0.17	0.01	0	0
HORVU.MOREX.r3.1HG0027560	TPM	0	0	0	0	0	0	0	0	0	0	0	0	0	0	0	0	0	0	0	0	0
HORVU.MOREX.r3.1HG0027590	TPM	0	0.22	0.65	0.28	0.93	2.53	0.18	0	0.2	0	0	0.39	0.4	0.58	0.18	0.18	0.19	0	1.6	5.24	1.93
HORVU.MOREX.r3.1HG0027640	TPM	13.13	17.41	14.36	34.17	34.43	39.12	37.01	40.5	35.49	37.03	43.62	37.22	41.98	30.03	38.49	30.37	56.63	42.86	54.53	57.99	152.41
HORVU.MOREX.r3.1HG0027650	TPM	29.16	43.33	39.6	42.68	45.68	42.3	24.36	22.05	22.49	25.33	22.34	21.02	30.93	20.41	20.42	22.87	35.02	25.31	70.09	56.28	167.75
HORVU.MOREX.r3.1HG0027680	TPM	24.68	26.44	21.78	30.66	25.94	21.51	29.85	25.25	28.96	28.72	23.6	26.15	18.41	23.81	22.5	20.55	17.61	17.44	10.67	18.25	16.34
HORVU.MOREX.r3.1HG0027710	TPM	0.16	0.78	0.63	0.1	0	0.13	0	0	0	0	0	0	0.14	0.07	0.07	0.13	0.29	0.22	0.6	1.13	0.6
HORVU.MOREX.r3.1HG0027740	TPM	0	0	0.09	0.1	0.13	0	0	0	0.07	0.07	0	0	0	0	0.07	0	0.34	0	0.24	0	0
HORVU.MOREX.r3.1HG0027750	TPM	0	0	0	0	0	0	0	0	0	0	0	0	0	0.07	0.07	0	0	0	0	0.42	0
HORVU.MOREX.r3.1HG0027800	TPM	0.49	0.34	0.59	0.7	0.49	0.85	1.01	0.61	0.86	0.57	0.7	0.74	1.02	0.99	1.24	0.78	1.02	0.69	0.29	0.68	0.66
HORVU.MOREX.r3.1HG0027810	TPM	0	0	0	0	0	0	0	0	0	0	0	0	0	0	0.18	0	0	0	0	0	0
HORVU.MOREX.r3.1HG0027820	TPM	0	0	0	0	0	0	0	0	0	0	0	0	0	0	0	0	0	0	0	0	0
HORVU.MOREX.r3.1HG0027850	TPM	106.99	55	61.74	146.26	97.02	108.72	120.08	108.68	110.77	119.59	105.91	121.84	107.61	107.26	107.62	91.38	98.98	118.78	11.68	32.79	23.92
HORVU.MOREX.r3.1HG0027880	TPM	0	0	0	0	0	0	0	0	0	0	0	0	0	0	0	0	0	0	0	0	0
HORVU.MOREX.r3.1HG0027890	TPM	0	0.11	0	0	0	0.18	0	0	0	0	0	0	0	0	0	0	0	0	0	0.12	0
HORVU.MOREX.r3.1HG0027930	TPM	5.71	6.22	5.95	4.07	8.02	6.36	6.61	9.64	11.24	5.57	5.12	7.75	5.86	6.61	6.65	4.75	5.32	2.95	8.52	7.4	19.76
HORVU.MOREX.r3.1HG0027940	TPM	7.36	5.03	5.81	8.66	13.91	15.82	3.87	4.18	4.66	5.64	3.77	6.51	5.86	6.37	5.87	5.91	7.76	8.25	2.11	1.02	2.37
HORVU.MOREX.r3.1HG0027950	TPM	0.3	0.25	0.33	0.22	0.5	0.72	0.25	0.28	0.27	0.14	0.11	0.22	0.38	0.18	0.21	0.3	0.67	0.35	0.4	0.36	0.32
HORVU.MOREX.r3.1HG0028030	TPM	0	0	0	0	0	0	0	0	0	0	0	0	0	0	0	0	0	0	0	0	0
HORVU.MOREX.r3.1HG0028070	TPM	0	0	0	0	0	0	0.07	0.21	0	0.28	0.36	0.38	0.31	0.15	0	0	0.07	0	0	0	0
HORVU.MOREX.r3.1HG0028080	TPM	0	0	0	0	0	0	0	0	0	0	0	0	0	0	0	0	0	0	0	0	0
HORVU.MOREX.r3.1HG0028100	TPM	3.77	5.4	5.01	4.45	4.47	7.75	4.88	2.54	4.03	3.41	3.03	3.93	2.12	5.18	3.68	2.86	1.72	2.3	0.71	0.98	1.65
HORVU.MOREX.r3.1HG0028110	TPM	43.57	58.4	55.89	35.09	26.91	31.56	30.03	34.81	40.51	36.32	35.11	32.41	37.68	39.22	35.5	33.93	35.51	41.72	74.99	79.97	88.03
HORVU.MOREX.r3.1HG0028150	TPM	81.46	62.93	77.33	77.65	108.31	119.37	40.35	35.51	36.14	39.44	32.72	37.02	37.86	39.58	40.68	42.34	41.91	37.26	26.87	26.76	41.65
HORVU.MOREX.r3.1HG0028190	TPM	0.87	1.27	1.06	0.83	0.73	1.06	1.26	1.09	2.16	0.54	0.55	0.96	0.2	1.14	0.18	0.87	0.54	0.6	1.41	1.16	0.71
HORVU.MOREX.r3.1HG0028220	TPM	19.16	15.82	20	21.2	18.44	16.9	25.36	21.02	24.77	20.93	26.35	28.69	28.17	30.69	28.5	22.7	26.26	42.55	10.54	13.03	14.59
HORVU.MOREX.r3.1HG0028230	TPM	6.81	5.55	5.83	6.58	6.78	6.94	11.05	9.49	10.16	9.52	9.37	10.23	8.98	8.54	10.97	8.43	8.32	5.95	11.01	10.58	7.08
HORVU.MOREX.r3.1HG0028240	TPM	0	0	0	0	0	0	0	0	0	0	0	0	0	0	0	0	0	0	0	0	0
HORVU.MOREX.r3.1HG0028250	TPM	3.64	2.87	2.4	3.18	3.35	2.57	1.42	1.67	1.86	1.53	1.3	1.6	0.91	1.19	0.71	0.9	0.84	1.27	0.27	0.6	1.15
HORVU.MOREX.r3.1HG0028280	TPM	25.52	22.3	27.83	31.65	36.58	41.34	38.91	35.22	36.01	36.31	36.04	38.04	33.86	34.12	35.68	35.75	32.37	27.4	64.18	55.58	57.66
HORVU.MOREX.r3.1HG0028320	TPM	77.74	45.15	42.17	97.01	57.85	60.14	104.49	83.44	58.88	107.46	84.16	75.98	72.45	72.59	53.26	112.95	91.83	93.22	38.18	45.73	33.31
HORVU.MOREX.r3.1HG0028360	TPM	0	0	0	0	0.3	0.29	0.31	0	0.42	0	0	0	0	0.6	0	0.28	0.3	0	3.77	0.9	0.88
HORVU.MOREX.r3.1HG0028380	TPM	12.51	27.09	15.96	4.36	18.42	9.79	5.45	4.47	3.29	2.6	1.63	3.13	8.42	7.85	8.05	6.72	7.93	11.48	86.18	104.89	93.73
HORVU.MOREX.r3.1HG0028400	TPM	12.51	27.09	15.96	4.36	18.42	9.79	5.45	4.47	3.29	2.6	1.63	3.13	8.42	7.85	8.05	6.72	7.93	11.48	86.18	104.89	93.73
HORVU.MOREX.r3.1HG0028440	TPM	14.62	34.78	23.94	7.79	4.56	4.79	3.94	1.49	0.67	1.09	1.39	1.35	4	3.79	5.53	5.39	6.09	10.17	76.78	120.99	131.91
HORVU.MOREX.r3.1HG0028450	TPM	0	0.21	0	0	0.36	0	0	0	0	0.06	0	0	0.19	0	0	0	0	14.56	1.13	0.68	0.46
HORVU.MOREX.r3.1HG0028570	TPM	3.98	4.45	3.79	2.17	3.04	1.15	2.12	0.7	1.35	1.27	0.33	1.49	2.08	3.61	2.47	1	1.2	12.5	17.26	24.47	15.24
HORVU.MOREX.r3.1HG0028790	TPM	4.89	10.89	5.49	2.7	4.79	3.72	1.79	1.92	2.02	3.03	0.25	0.3	3.05	2.62	3.59	2.02	1.71	5.25	28.91	35.5	29.37
HORVU.MOREX.r3.1HG0028850	TPM	10.16	18.58	10.88	7.51	13.98	7.7	3.64	2.52	0.65	1.58	1.31	4.07	6.74	8.16	7.7	9.71	5.77	3.95	114.81	106.91	69.33
HORVU.MOREX.r3.1HG0028870	TPM	0	0	0	0	0	0	0	0	0	0	0	0	0	0	0	0	0	0	0	0	0
HORVU.MOREX.r3.1HG0029060	TPM	456.39	365.22	353.88	488.84	363.76	373.69	338.95	307.76	290.47	311.9	245.19	323.68	245.41	257.54	253.23	226.98	253.62	300.07	68.16	131.1	91.5
HORVU.MOREX.r3.1HG0029090	TPM	0	0	0	0.29	0	0	0	0.19	0.21	0	0.39	0	0	0	0	0.18	0	0	0	0.25	0.25
HORVU.MOREX.r3.1HG0029100	TPM	14.81	9.32	12.44	26	32.71	57.95	40.09	47.5	33.08	31.27	26.28	31.01	30.54	38.13	31.1	31.85	27.16	28.16	26.07	36.22	18.95
HORVU.MOREX.r3.1HG0029140	TPM	0	0	0	0	0	0	0	0	0	0	0	0	0	0	0	0	0	0	0	0	0
HORVU.MOREX.r3.1HG0029150	TPM	0	0	0	0	0	0	0	0	0.02	0	0	0	0	0.02	0	0	0	0	0	0	0
HORVU.MOREX.r3.1HG0029190	TPM	0	0	0	0	0	0	0	0	0	0	0	0	0	0	0.14	0	0	0	0	0	0
HORVU.MOREX.r3.1HG0029200	TPM	0	0	0	0	0	0	0.12	0	0	0	0	0	0	0	0	0	0	0	0	0	0
HORVU.MOREX.r3.1HG0029210	TPM	0	0	0	0	0	0	0	0	0	0	0	0	0	0	0	0	0	0	0	0	0
HORVU.MOREX.r3.1HG0029220	TPM	0.45	0.66	0.33	0	0.19	0.91	0	0.09	0	0.09	0	0.2	0	0	0.09	0	0.09	0	1.62	3.49	1.71
HORVU.MOREX.r3.1HG0029240	TPM	14.88	11.94	12.61	18.1	19.95	17.14	20.81	24.1	23.07	17.38	19.54	16.26	14.75	12.92	16.25	12.88	15.06	16.64	13.08	18.11	18.17
HORVU.MOREX.r3.1HG0029270	TPM	109.4	79.9	81.19	101.77	111.9	102.29	88.71	85.13	92.68	84.8	83.88	91.79	85.4	82.42	85.64	81.84	77.58	65.1	45.74	74.82	68.41
HORVU.MOREX.r3.1HG0029280	TPM	215.06	184.46	205.48	222.51	194.39	193.2	172.16	166.75	186.05	158.2	158.9	163.33	151.38	172.13	156.14	144.77	158.18	214.04	145.51	173.81	172.4
HORVU.MOREX.r3.1HG0029300	TPM	0.6	0	0.33	0	0.07	0.07	0	0	0.08	0	0	0	0	0.15	0	0.14	0	0.24	0.12	0	0
HORVU.MOREX.r3.1HG0029320	TPM	7.52	5.59	6.07	7.96	7.6	6.1	5.65	5.33	4.49	4.93	4.51	4.99	4.8	3.62	4.81	3.76	4.07	3.75	1.73	2.35	1.84
HORVU.MOREX.r3.1HG0029340	TPM	208.71	200.45	240.1	183	173.09	165.15	138.5	129.81	150.53	136.11	131.85	141.52	135.84	140.31	129.71	129.26	139.51	178.29	239.26	235.57	293.73
HORVU.MOREX.r3.1HG0029360	TPM	3.77	3.92	2.51	2.65	2.53	4.99	7.39	7.54	4.58	15.18	4.63	9.99	14.53	16.51	11.9	14.48	11.26	15.28	5.12	4.31	4.09
HORVU.MOREX.r3.1HG0029430	TPM	28.12	36.85	35.77	25.23	25.87	23.02	23.81	22.15	24.05	26.4	25.97	27.67	21.18	23.97	24.1	21.63	22.93	30.37	13.82	14.24	20.64
HORVU.MOREX.r3.1HG0029470	TPM	24.64	23.65	25.33	18.02	13.81	15.77	15.85	13.56	17.27	15.11	11.48	16.54	17.39	20.84	20.98	17.15	16.93	23.89	4.05	3.7	5.21
HORVU.MOREX.r3.1HG0029480	TPM	0.98	2.83	1.61	2.73	1.79	7.66	4.47	1.67	1.4	1.17	0.9	0.39	10.99	6.53	4.79	3.19	10.18	5.95	0.35	0.76	0.53
HORVU.MOREX.r3.1HG0029490	TPM	24.27	22.16	21.18	19.77	20.06	20.35	34.09	32.06	28.09	37.24	47.01	43.69	47.27	44.67	47.03	53.81	47.03	51.74	28.45	28.96	33.49
HORVU.MOREX.r3.1HG0029500	TPM	0	0	0	0	0	0	0	0	0	0	0	0	0	0	0	0	0	0	0	0	0
HORVU.MOREX.r3.1HG0029510	TPM	3.69	2.97	2.71	7.46	4.44	5.02	6.54	5.22	6.52	6.42	5.96	7.09	5.88	6.19	7.31	4.86	5.79	7.26	1.18	2.16	1.66
HORVU.MOREX.r3.1HG0029520	TPM	0	0	0	0	0	0	0	0	0	0	0	0	0	0	0	0	0	0	0	0	0
HORVU.MOREX.r3.1HG0029540	TPM	0	0	0	0	0	0	0	0	0	0	0	0	0	0	0	0	0	0	0	0	0
HORVU.MOREX.r3.1HG0029600	TPM	0	0	0	0	0	0	0	0	0	0	0	0	0	0	0	0	0	0	0	0	0
HORVU.MOREX.r3.1HG0029620	TPM	14.96	18.17	17.33	24.2	18.97	20.65	17.25	14.3	22.02	13.69	15.19	13.09	14.68	13.22	13.92	10.45	9.86	16.39	8.51	3.38	9.03
HORVU.MOREX.r3.1HG0029650	TPM	0	0	0	0	0	0	0.22	0	0	0	0	0.23	0	0	0	0	0	0	0	0	0
HORVU.MOREX.r3.1HG0029680	TPM	0	0.02	0	0	0	0	0	0	0	0	0	0	0	0	0	0	0	0	0	0	0
HORVU.MOREX.r3.1HG0029690	TPM	0	0	0	0	0	0	0	0	0	0	0	0	0	0	0	0	0	0	0	0	0
HORVU.MOREX.r3.1HG0029730	TPM	164.74	139.11	92.03	117.76	88.83	145.15	71.49	80.55	60.39	141.91	51.46	118.9	109.21	121.14	112.29	95.44	104.19	99.77	14.13	18.03	35.6
HORVU.MOREX.r3.1HG0029780	TPM	0	0	0	0	0	0	0	0	0	0	0	0	0	0	0	0	0	0	0	0	0
HORVU.MOREX.r3.1HG0029820	TPM	0	0	0	0	0	0	0	0	0	0	0	0	0	0	0	0	0	0	0	0	0
HORVU.MOREX.r3.1HG0029890	TPM	2.3	0.49	1.94	5.33	3.97	5.61	4.08	4.1	4.26	1.89	2.35	2.31	2.97	3.48	3.63	2.13	1.66	2.6	2.29	1.73	1.35
HORVU.MOREX.r3.1HG0029900	TPM	301.15	270.16	281.28	378.14	340.6	335.67	294.35	291.82	303.57	256.19	245.83	258.74	212.53	195.88	214.62	193.6	219.61	203.49	159.03	216.85	190.07
HORVU.MOREX.r3.1HG0029910	TPM	54.88	54.33	63	47.52	45.06	44.54	25.16	24.07	27.98	28.87	23.77	25.98	26.12	27.91	25.63	25.3	27.77	34.54	40.74	39.61	43.58
HORVU.MOREX.r3.1HG0029990	TPM	0	0	0	0	0	0	0	0	0	0	0	0	0	0	0	0	0	0	0	0	0
HORVU.MOREX.r3.1HG0030000	TPM	0	0	0	0	0	0	0	0	0	0	0	0	0	0	0	0	0	0	0	0	0
HORVU.MOREX.r3.1HG0030010	TPM	0.61	0.38	0.7	2.52	2.74	4.65	3	3.2	2.32	2.56	2.37	2.98	2.61	2.69	2.61	3.56	2.42	1.59	0.36	2.3	0.23
HORVU.MOREX.r3.1HG0030080	TPM	87.39	62.45	68.72	152.75	142.66	123.18	169.3	167.49	196.88	151.5	175.07	167.74	129.82	136.59	132.48	105.27	121.95	116	79.91	97.43	99.3
HORVU.MOREX.r3.1HG0030090	TPM	2.55	0.36	1.32	1.54	3.74	3.67	3.48	3.29	2.76	2.76	2.78	4.19	2.86	2.55	3.32	1.77	3.04	2.89	0.74	1.76	0.79
HORVU.MOREX.r3.1HG0030120	TPM	35.29	34.52	36.79	37.17	39.45	32.69	32.32	30.37	30.01	25.41	28.34	31.41	30.18	27.35	28.22	27.57	23.55	26.93	10.72	20.29	17.89
HORVU.MOREX.r3.1HG0030200	TPM	4.03	2.55	3.46	2.89	4.85	7.28	2.48	2.96	1.66	2.26	1.57	2.55	2.82	2.1	2.51	3.51	2.38	2.08	1.3	3.61	1.44
HORVU.MOREX.r3.1HG0030210	TPM	0	0	0	0	0	0	0	0	0	0	0	0	0	0	0	0	0	0	0	0	0
HORVU.MOREX.r3.1HG0030220	TPM	0	0	0	0	0	0	0	0	0	0	0	0	0	0	0	0	0	0	0	0	0
HORVU.MOREX.r3.1HG0030230	TPM	0	0	0	0	0	0	0	0	0	0	0	0	0	0	0	0	0	0	0	0	0
HORVU.MOREX.r3.1HG0030240	TPM	19.99	16.73	21.28	18.11	13.25	13.84	19.08	17.99	17.66	20	19.89	21.34	17.91	19.79	19.44	23.52	23.66	24.96	18.8	27.89	29.5
HORVU.MOREX.r3.1HG0030280	TPM	0	0	0	0	0	0	0	0	0	0	0	0	0.17	0	0	0	0	0	0	0.4	0
HORVU.MOREX.r3.1HG0030290	TPM	0	0.07	0	0.54	0.53	1.08	0.06	0.06	0.13	0	0.18	0.12	0.13	0.12	0.29	0.28	0.47	0.1	0.05	0.67	0.15
HORVU.MOREX.r3.1HG0030320	TPM	58.22	45.07	41.22	56.01	75.28	66.42	74.23	68.3	54.78	81.03	69.55	75.51	75.43	73.29	73.93	91.55	80.72	67.79	22.58	63.12	33.05
HORVU.MOREX.r3.1HG0030330	TPM	33.27	28.73	25.94	18.46	15.16	13.42	16.22	12.93	13.54	15.65	13.01	17.2	22.68	18.73	22.12	22.17	18.58	23.12	2.92	2.57	2.92
HORVU.MOREX.r3.1HG0030350	TPM	0	0	0	0	0	0	0	0	0	0	0	0	0	0	0	0	0	0	0	0	0
HORVU.MOREX.r3.1HG0030390	TPM	0	0	0	0	0	0.04	0.03	0	0	0	0	0	0	0	0.03	0	0	0	0	0	0.08
HORVU.MOREX.r3.1HG0030500	TPM	13.33	13.76	16.24	9.69	12.18	10.23	11.78	11.72	11.77	12.48	17	14.64	17.91	16.57	18.51	18.91	19.25	18.68	21.37	18.3	25.24
HORVU.MOREX.r3.1HG0030510	TPM	0	0	0	0	0	0	0	0	0	0	0	0	0	0	0	0	0	0	0	0	0
HORVU.MOREX.r3.1HG0030520	TPM	0	0	0	0	0	0.32	0.08	0	0.09	0	0	0	0	0.09	0	0	0	0	0.07	0.21	0
HORVU.MOREX.r3.1HG0030590	TPM	787.26	604.06	632.48	1059.57	1124.52	922.43	958.06	946.04	1016.73	833.78	780.94	768.99	627.79	569.59	654.09	464.12	513.84	448.98	148.08	432.35	300.86
HORVU.MOREX.r3.1HG0030630	TPM	15.27	10.11	14.76	15.66	18.8	13.37	12.61	13.13	12.31	11.91	12.39	13.19	14.14	12.73	13.99	11.19	13.81	13.67	6.97	11.37	7.86
HORVU.MOREX.r3.1HG0030640	TPM	0	0	0	0	0	0	0	0	0	0	0	0	0	0	0	0	0	0	0	0	0
HORVU.MOREX.r3.1HG0030650	TPM	126.09	118.6	119.63	124.58	122.13	113.72	90.86	83.56	100.84	97.75	99.68	98.09	87.28	91.01	91	85.92	87.12	89.87	43.33	56.36	60.46
HORVU.MOREX.r3.1HG0030690	TPM	1.48	0.77	1.08	0.27	0.71	0.77	0.44	0.49	0.14	0.22	0	0.09	0.05	0.28	0.17	0.25	0	0.22	0.34	1.53	0.86
HORVU.MOREX.r3.1HG0030700	TPM	0	0	0	0	0	0	0	0	0	0	0	0	0	0	0	0	0	0	0	0	0
HORVU.MOREX.r3.1HG0030720	TPM	26.76	21.58	26.96	39.07	34.95	29.87	48.47	41.17	46.86	39.81	52.38	45.75	49.06	52.54	47.32	37.46	46.84	51.33	18.26	20.32	23.63
HORVU.MOREX.r3.1HG0030730	TPM	2.16	3.23	1.72	1.01	1.38	1.97	0.76	0.56	0.6	1.55	0.79	1.58	1.34	1.73	2.87	0.89	3.96	2.03	0.04	0.75	0.69
HORVU.MOREX.r3.1HG0030750	TPM	0	0	0	0	0	0	0	0	0.03	0	0	0.03	0	0	0	0	0	0	0	0	0
HORVU.MOREX.r3.1HG0030850	TPM	8.62	5.39	8.05	11.62	11.19	11.83	21.07	19.93	22.91	23.12	26.4	24.8	33.18	32.08	31.48	33.81	39.82	28.29	21.2	15.15	16.15
HORVU.MOREX.r3.1HG0030870	TPM	0	0	0	0	0	0	0	0.08	0	0	0	0	0	0	0	0	0	0	0	0	0
HORVU.MOREX.r3.1HG0031030	TPM	0	0	0.1	0	0	0	0	0	0	0	0	0	0	0	0	0	0	0.44	0.04	0	0.11
HORVU.MOREX.r3.1HG0031170	TPM	4.33	2.72	2.11	4.34	1.3	1.51	1.8	2.07	0.56	0.76	1.56	1.64	1.4	1.35	2.03	0.49	1.29	0.86	0.89	1.66	4.03
HORVU.MOREX.r3.1HG0031180	TPM	9.91	5.37	6.04	14.69	12.08	12.69	12.16	11.75	9.62	10.07	9.63	9.99	10.89	9.4	9.31	8.46	8.07	10.58	4.53	6.69	4.75
HORVU.MOREX.r3.1HG0031210	TPM	38.58	53.93	34.81	48.72	55.48	77.96	27.21	16.74	16.91	14.97	8.73	9.03	26.45	19.23	17.41	24.15	21.81	12.29	8.63	10.38	5.46
HORVU.MOREX.r3.1HG0031220	TPM	0	0	0	0	0	0	0	0	0	0	0	0	0	0	0	0	0	0	0	0	0
HORVU.MOREX.r3.1HG0031230	TPM	0	0	0	0	0	0	0	0	0	0	0	0	0	0	0	0	0	0	0	0	0
HORVU.MOREX.r3.1HG0031260	TPM	0.16	0.05	0.05	0	0.13	0.04	0.04	0.13	0.24	0	0.04	0.33	0.1	0.09	0.13	0.08	0.22	0.3	0.08	0	0.23
HORVU.MOREX.r3.1HG0031270	TPM	0	0	0	0	0	0	0	0	0	0	0	0	0	0	0	0	0	0	0	0	0
HORVU.MOREX.r3.1HG0031310	TPM	0.14	0.13	0	0	0	0	0	0	0	0	0	0	0.12	0	0	0.11	0	0	0.9	0.59	0.3
HORVU.MOREX.r3.1HG0031320	TPM	29.97	25.8	26.09	34.19	31.77	29.61	33.43	30.34	32.74	24.38	31.3	29.07	30.3	36.39	31.78	30.04	32.04	18.9	37.49	41.07	40.99
HORVU.MOREX.r3.1HG0031340	TPM	0	0	0	0	0	0	0	0	0	0	0	0	0	0	0	0	0	0	0	0	0
HORVU.MOREX.r3.1HG0031380	TPM	40.13	77.5	62.93	26.13	34.13	43.81	26.59	28.71	24.02	28.44	20.82	23.11	31.93	31.38	30.91	37.68	37.49	23.84	56.54	66.9	46.87
HORVU.MOREX.r3.1HG0031410	TPM	7.98	6.03	8	15.01	12.74	13.44	13.71	13.48	15.46	11.71	11.26	12.08	10.92	10.49	10.01	9.7	8.96	10.32	8.37	10.45	9.74
HORVU.MOREX.r3.1HG0031420	TPM	0.08	0	0.23	0.16	0	0.03	0	0.04	0.04	0	0.04	0.04	0	0.04	0	0.03	0.07	0.22	0	0.04	0
HORVU.MOREX.r3.1HG0031450	TPM	85.56	80.45	85.74	72.25	73.76	61.75	58.23	55.03	62.88	52.52	59.44	62.02	59.31	64.57	63.31	47.13	55.26	70.96	16.38	20.63	27.66
HORVU.MOREX.r3.1HG0031460	TPM	0	0.1	0	0	0	0	0	0	0	0	0	0	0	0	0	0	0	0	0	0	0
HORVU.MOREX.r3.1HG0031470	TPM	0	0	0	0	0	0.31	0	0	0.09	0.08	0.08	0.08	0.26	0.33	0.23	0.23	0.32	0.13	0	0.1	0
HORVU.MOREX.r3.1HG0031480	TPM	0	0	0	0.17	0.15	0.21	0.36	0.33	0.36	0.33	0.07	0.16	0.71	0.58	0.83	0.66	0.26	0.37	0.1	0.14	0.24
HORVU.MOREX.r3.1HG0031520	TPM	0.91	0.72	0.72	13.13	2.57	5.93	13	13.13	12.77	10.81	12.64	14.45	12.48	10.01	11.27	6.88	6.38	10.02	0.07	0.35	0.13
HORVU.MOREX.r3.1HG0031680	TPM	0	0	0	0	0	0	0	0	0	0	0	0	0	0	0	0	0	0	0	0	0
HORVU.MOREX.r3.1HG0031730	TPM	175.3	117.34	158.07	122.31	114.52	100.87	111.03	116.28	106.69	87.89	93.18	114.81	91.78	92.75	106.54	80.41	79.74	101.47	6.62	29.31	5.56
HORVU.MOREX.r3.1HG0031740	TPM	0	0	0	0	0	0	0	0	0	0	0	0	0	0	0	0	0	0	0	0	0
HORVU.MOREX.r3.1HG0031750	TPM	0	0	0.66	0	0	0.18	0	0.19	0.2	0.37	0	0.2	0.2	0.2	0	0.18	0.19	0.31	0	0	0
HORVU.MOREX.r3.1HG0031770	TPM	31.27	41.25	36.12	35.35	26.44	29.47	22.24	19.26	24.43	23.91	22.76	23.9	24.68	26.63	25.54	26.83	25.17	31.53	16.25	18.09	20.19
HORVU.MOREX.r3.1HG0031820	TPM	1.31	2.95	2.46	4.38	4.57	12.37	9.21	8	4.27	8.55	3.13	5.09	20.27	15.96	11.51	27.37	20.21	26.36	2.47	3.24	1.64
HORVU.MOREX.r3.1HG0031900	TPM	0	0	0	0	0	0	0	0	0	0	0	0	0	0	0	0	0	0	0	0	0
HORVU.MOREX.r3.1HG0031920	TPM	0	0	0	0	0	0	0	0	0	0	0	0	0	0	0	0	0	0	0	0	0
HORVU.MOREX.r3.1HG0031940	TPM	0	0	0	0.26	0	0	0.11	0.06	0.37	0.62	0.23	0.37	0.43	0.12	0.57	0.05	0.4	2.01	0	0	0
HORVU.MOREX.r3.1HG0031950	TPM	0	0	0	0	0	0	0	0	0	0	0	0	0	0	0	0	0	0	0	0.11	0
HORVU.MOREX.r3.1HG0031980	TPM	15.8	12.76	15.89	17.89	17.38	14.79	25.4	24.99	25.77	27.49	31.67	32.92	30.48	31.63	35.46	28.59	31.14	38.02	10.46	16.51	14.02
HORVU.MOREX.r3.1HG0032000	TPM	0	0	0	0	0	0	0	0	0	0	0	0	0	0	0	0	0	0	0	0	0
HORVU.MOREX.r3.1HG0032010	TPM	0	0	0	0	0	0	0	0	0	0	0	0	0	0	0	0	0	0.24	0	0	0
HORVU.MOREX.r3.1HG0032030	TPM	0	0	0	0	0	0	0	0	0.09	0	0	0	0	0	0	0	0	0	0	0	0
HORVU.MOREX.r3.1HG0032040	TPM	0	0	0	0	0	0	0	0	0	0	0	0	0	0	0	0	0	0	0	0	0
HORVU.MOREX.r3.1HG0032050	TPM	0	0	0	0	0	0	0	0	0	0	0	0	0	0	0	0	0	0	0	0	0
HORVU.MOREX.r3.1HG0032070	TPM	0	0	0	0	0	0	0	0	0	0	0.02	0	0	0	0	0	0	0	0	0	0
HORVU.MOREX.r3.1HG0032140	TPM	28.79	35.98	34.56	22.96	22.95	21.59	43.49	44.46	41.16	45.81	58.59	48.32	59.78	60.33	61.12	55.99	59.41	68.24	55.55	65.02	69.95
HORVU.MOREX.r3.1HG0032150	TPM	165.39	154.7	167.02	203.76	175.81	176.35	186.16	179.51	183.66	163.72	161.61	174.89	155.5	159.26	147.19	147.59	161.11	189.1	144.97	164	206.5
HORVU.MOREX.r3.1HG0032160	TPM	11.98	9.01	8.89	13.44	13.01	13.04	16.04	16.01	14.75	13.91	15.03	18.06	15.69	12.36	12.55	11.38	11.12	9.16	4.41	6.11	4.06
HORVU.MOREX.r3.1HG0032170	TPM	0	0	0	0	0	0	0	0	0	0	0	0	0	0	0	0	0	0	0	0	0
HORVU.MOREX.r3.1HG0032200	TPM	0.31	0.22	0.08	1.14	0.51	1.47	3.07	1.93	1.93	8.31	5.88	7.06	16.12	12.74	9.25	23.44	19.31	15.73	0.06	0.24	0
HORVU.MOREX.r3.1HG0032220	TPM	0	0	0	0	0	0	0	0	0	0	0	0	0	0	0	0	0	0	0	0	0
HORVU.MOREX.r3.1HG0032230	TPM	12.28	8.93	9.46	11.44	10.21	9.6	8.56	8.33	6.73	6.03	5.45	7.02	5.33	5.61	4.69	6.52	4.88	5.94	0.97	4.13	1.63
HORVU.MOREX.r3.1HG0032260	TPM	129.25	137.72	128.96	97.32	86.97	83.96	58.81	50.5	57.28	51.88	53.95	51.52	60.57	56.22	54.61	57.57	62.32	64.02	42.63	74.4	61.33
HORVU.MOREX.r3.1HG0032470	TPM	70.23	65.99	60.16	92.64	93.96	91.7	96.53	101.34	119.6	80.93	80.86	73.54	74.18	70.92	75.9	50.45	61.57	50.08	19.98	38.07	29.92
HORVU.MOREX.r3.1HG0032510	TPM	0	0	0	0	0	0	0	0	0	0	0	0	0	0.1	0	0	0	0	0	0	0
HORVU.MOREX.r3.1HG0032540	TPM	36.97	36.72	37.61	33.34	35.49	36.75	26.06	25.78	28.77	23.09	25.98	24.44	22.35	24.81	27.8	25.18	25.21	23.24	20.75	19.16	32.46
HORVU.MOREX.r3.1HG0032560	TPM	0	0	0	0	0	0	0	0	0	0	0	0	0	0	0	0	0	0	0	0	0
HORVU.MOREX.r3.1HG0032570	TPM	55.38	40.08	44.4	79.62	70.61	61.68	48.41	44.92	54.28	47.93	37.96	41.45	34.04	35.34	33.09	29.02	32.47	39.38	19.71	27.19	35.75
HORVU.MOREX.r3.1HG0032650	TPM	4.62	2.69	2.98	10.61	7.32	9.25	9.3	8.49	9.33	10.39	7.49	8.53	7.48	8.36	7.06	7.64	9.05	6.43	0.75	2.32	2.02
HORVU.MOREX.r3.1HG0032710	TPM	53.96	40.78	46.9	56.69	48.33	47.9	42.2	43.51	48.45	41.61	41.43	44.5	35.94	42.19	42.83	31.97	34.32	40.15	30.29	35.53	40.12
HORVU.MOREX.r3.1HG0032760	TPM	114.55	117.28	122.02	96.4	86.7	77.64	91.19	87.73	93.53	86.24	99.71	94.74	96.14	98.45	104.6	99.83	93.21	113.62	52.09	57.15	69.08
HORVU.MOREX.r3.1HG0032790	TPM	0	0	0	0	0	0	0	0	0	0	0	0	0	0	0	0	0	0	0	0	0
HORVU.MOREX.r3.1HG0032800	TPM	0	0	0	0	0	0	0	0	0	0	0	0	0.22	0	0	0	0	0	0	0	0
HORVU.MOREX.r3.1HG0032820	TPM	0	0	0	0	0	0	0	0	0	0	0	0	0	0	0	0	0	0	0	0	0
HORVU.MOREX.r3.1HG0032840	TPM	9.35	7.51	9.47	12.25	12.62	11.7	11.71	10.66	12.38	8.34	11.1	11.34	13.43	12.91	11.83	10.88	10.6	5.95	4.8	4.91	7.97
HORVU.MOREX.r3.1HG0032860	TPM	0	0	0	0	0	0	0	0	0	0	0	0	0	0	0	0	0	0	0	0	0
HORVU.MOREX.r3.1HG0032870	TPM	0	0	0	0	0	0	0	0	0	0	0	0	0	0	0	0	0	0	0	0	0
HORVU.MOREX.r3.1HG0032910	TPM	54.51	60.68	55.63	30.12	39.58	30.32	10.91	9.27	14.05	9.59	8.04	9.34	10.07	9.91	9.53	8.5	8.76	12.79	4.31	4.02	5.54
HORVU.MOREX.r3.1HG0032930	TPM	0.5	0.13	0.62	0.87	0.84	1.95	0.38	0.19	0.33	0.48	0.11	0.36	0.12	0.16	0.11	0.36	0.23	0.31	0.26	0.39	0.05
HORVU.MOREX.r3.1HG0032990	TPM	32.41	19.15	23.26	104.1	57.12	56.68	174.89	157.69	137.81	152.96	168.7	160.29	153.82	146.02	150.66	184.87	158.14	167.17	64.99	62.17	62.66
HORVU.MOREX.r3.1HG0033070	TPM	0	0.06	0	0.08	0.05	0	0.05	0	0	0	0.05	0.06	0	0	0.1	0	0.16	0	0	0	0
HORVU.MOREX.r3.1HG0033110	TPM	0	0	0	0	0	0	0	0	0	0	0	0	0	0	0	0	0	0	0	0	0
HORVU.MOREX.r3.1HG0033120	TPM	0	0	0	0	0	0	0	0	0	0	0	0	0	0	0	0	0	0	0	0	0
HORVU.MOREX.r3.1HG0033130	TPM	16.49	13.49	15.56	11.23	10.58	9.96	9.43	8.23	9.05	6.95	8.94	7.69	7.64	9.16	8.22	6.87	8.76	9.75	8.2	9.97	12.81
HORVU.MOREX.r3.1HG0033150	TPM	0	0	0	0	0	0	0	0	0	0	0	0	0	0	0	0	0	0	0	0	0
HORVU.MOREX.r3.1HG0033160	TPM	0	0	0	0	0	0	0	0	0	0	0	0	0	0	0	0	0	0	0	0	0
HORVU.MOREX.r3.1HG0033310	TPM	14.16	6.84	9.74	27.44	19.07	20.22	19.04	17.93	17.46	16.14	14.91	19.35	13.72	13.77	14.36	12.37	12.78	14.93	1.38	5.57	2.05
HORVU.MOREX.r3.1HG0033330	TPM	3.4	2.52	2.85	10.21	7.38	7.78	12.88	12.45	13.96	13.04	14.23	15.46	19.01	19.4	17.87	17.25	16.73	25.31	2.72	2.95	3.46
HORVU.MOREX.r3.1HG0033350	TPM	112.89	76.32	91.4	62.26	51.97	55.76	41.47	40.75	44.85	36.12	33.23	43.06	41.83	50.16	48.5	32.75	41	49.55	24.91	32.63	36.06
HORVU.MOREX.r3.1HG0033380	TPM	0	0	0	0	0	0	0	0	0	0	0	0	0	0	0	0	0	0	0	0	0
HORVU.MOREX.r3.1HG0033390	TPM	21.1	16.34	16.69	39.12	23.65	26.71	42.84	40.16	46.18	37.88	43.64	42.27	47.23	43.92	49.11	40.93	43.9	47.32	11.76	19.66	16.47
HORVU.MOREX.r3.1HG0033440	TPM	0.21	0.41	0.15	0.4	0.13	0.34	0.69	0.83	1.13	0.82	1.22	0.46	0.61	0.82	0.86	0.83	0.83	0.87	0.08	0.28	0.28
HORVU.MOREX.r3.1HG0033470	TPM	0	0	0	0	0	0	0	0	0	0	0	0	0	0	0	0	0	0	0	0	0
HORVU.MOREX.r3.1HG0033510	TPM	0	0	0	0.01	0	0	0	0.08	0	0	0	0	0.06	0	0	0	0	0	0	0	0
HORVU.MOREX.r3.1HG0033520	TPM	0	0	0	0	0	0	0	0	0	0	0	0	0	0	0	0	0	0	0	0	0
HORVU.MOREX.r3.1HG0033530	TPM	0	0	0	0	0	0	0	0	0	0	0	0	0	0	0	0	0	0	0	0	0
HORVU.MOREX.r3.1HG0033540	TPM	28.15	24.82	27.47	30.12	28.09	27.75	27.08	27.76	30.71	26.82	27.74	31.37	32.84	30.79	30.33	25.48	28.81	31.71	11.09	14.81	17.15
HORVU.MOREX.r3.1HG0033590	TPM	12.81	8.95	12.18	12.44	11.94	10.44	15.9	14.04	15.8	16.88	21.15	18.14	27.62	23.43	24.44	27.66	23.6	28.03	6.12	7.09	11.83
HORVU.MOREX.r3.1HG0033620	TPM	0	0	0	0	0	0	0	0	0	0	0	0	0	0	0	0	0	0	0	0	0
HORVU.MOREX.r3.1HG0033710	TPM	0.37	0	0	0.04	0.18	0	0	0	0	0	0.05	0	0	0	0	0	0	0	0	0	0
HORVU.MOREX.r3.1HG0033730	TPM	0.86	0.28	0.28	0.37	0.24	0.47	0.24	0.24	0.26	0.47	0	0.51	0.78	0	0	0.23	0.48	0.4	0.21	0.61	1.87
HORVU.MOREX.r3.1HG0033780	TPM	0	0	0	0	0	0	0	0	0	0	0	0	0	0	0	0	0	0	0	0	0
HORVU.MOREX.r3.1HG0033790	TPM	113.29	95.99	106.52	108.74	101.49	87.56	95.15	87.46	98.45	93.2	91.89	98.93	86.55	95.3	88.92	76.83	89.84	81.51	38.81	57.94	49.25
HORVU.MOREX.r3.1HG0033900	TPM	0	0	0	0	0	0	0	0	0	0	0	0	0	0	0	0	0	0	0	0	0
HORVU.MOREX.r3.1HG0033920	TPM	399.48	286.6	322.42	694.38	589.01	592.31	780.21	767.93	737.51	717.52	763.32	768.78	689.13	663.3	684.21	577.8	578.15	738.32	296.29	398.35	310.49
HORVU.MOREX.r3.1HG0033960	TPM	0	0	0	0	0	0	0	0	0	0	0	0	0	0	0	0	0	0	0	0	0
HORVU.MOREX.r3.1HG0033980	TPM	0	0	0	0	0	0	0	0	0	0	0	0	0	0	0	0	0	0	0	0	0
HORVU.MOREX.r3.1HG0034050	TPM	0	0	0	0	0	0	0	0	0	0	0	0	0	0	0	0	0	0	0	0	0
HORVU.MOREX.r3.1HG0034120	TPM	0	0	0	0	0	0	0	0	0	0	0	0	0	0	0	0	0	0	0	0	0
HORVU.MOREX.r3.1HG0034140	TPM	30.51	28.6	29.7	26.91	24.48	23.58	28.19	26.63	28.96	33.76	34.5	36.08	36.07	38.19	39.43	33.35	37.1	39.77	9.01	15.84	15.99
HORVU.MOREX.r3.1HG0034230	TPM	69.78	77.95	79.21	77.05	60.9	60	78.1	75.73	80.48	80.05	77.32	77.39	73.08	76.69	76.62	69.73	73.01	91.85	47.94	61.14	70.47
HORVU.MOREX.r3.1HG0034310	TPM	0.81	0.48	0.65	1.75	1.59	3.68	2.66	2.44	1.68	1.48	1.8	2.15	3.33	3.07	3.43	3.92	1.94	1.17	0.1	0.26	0.15
HORVU.MOREX.r3.1HG0034330	TPM	55.45	63.47	67.62	77.61	64.47	73.56	127.18	125.04	119.76	131.53	134.04	126.58	136.1	129.37	145.33	132.6	129.11	121.02	103.25	142.14	122.16
HORVU.MOREX.r3.1HG0034340	TPM	0	0	0	0	0	0	0	0	0	0	0	0	0	0	0	0	0	0	0	0	0
HORVU.MOREX.r3.1HG0034380	TPM	41.57	38.39	42.4	51.01	38.57	39.63	43.75	38.34	45.54	38.76	37.27	45.15	40.74	45.69	42.62	30.41	40.04	54	13.62	19.45	20.2
HORVU.MOREX.r3.1HG0034400	TPM	0	0	0	0	0	0	0	0	0	0	0	0	0	0	0	0	0	0	0	0	0
HORVU.MOREX.r3.1HG0034480	TPM	38.18	38	38.4	33.24	29.12	29.44	34.56	35.7	38.61	38.71	45.47	45.14	56.06	54.25	53.16	56.83	53.26	68.26	33.93	31.98	37.47
HORVU.MOREX.r3.1HG0034520	TPM	0	0	0	0	0	0	0	0	0	0	0.08	0	0	0	0	0	0	0	0	0	0
HORVU.MOREX.r3.1HG0034560	TPM	5.17	3.83	4.73	14.5	8.08	8.86	24.28	22.47	25.01	24.34	30.55	34.62	44.62	40.1	40.95	42.5	39.17	54.31	2.9	4.93	4.98
HORVU.MOREX.r3.1HG0034570	TPM	0	0	0	0	0	0	0	0	0	0	0	0	0	0	0	0	0.08	0	0.07	0	0.1
HORVU.MOREX.r3.1HG0034590	TPM	13.54	12	12.04	22.57	16.87	16.76	19.82	19.53	20.65	23.46	18.56	22.55	22.54	23.73	22.25	19.98	21.98	28.29	10.06	14.32	10.42
HORVU.MOREX.r3.1HG0034640	TPM	101.56	74.58	85.73	76.37	67.58	63.39	61.14	53.05	58.04	53.66	55.04	57.62	52.39	54.43	52.35	53.58	53.89	51.92	60.83	62.27	77.57
HORVU.MOREX.r3.1HG0034670	TPM	0	0	0.2	0	0	0	0	0	0	0	0	0	0	0	0	0	0	0	0	0	0
HORVU.MOREX.r3.1HG0034690	TPM	0	0	0	0	0	0	0	0	0	0	0	0	0	0	0	0	0	0	0	0	0
HORVU.MOREX.r3.1HG0034700	TPM	58.62	44.17	53.74	54.71	47.01	46.77	33.13	33.67	38.11	31.03	31.07	34.6	31.15	35.41	33.43	28.44	30.78	36.48	14.72	24.93	24.66
HORVU.MOREX.r3.1HG0034760	TPM	0	0.11	0.11	0	0	0	0.09	0	0.2	0.09	0	0	0	0.1	0.09	0	0	0	0	0	0
HORVU.MOREX.r3.1HG0034850	TPM	20.43	9.38	10.92	28.37	26.55	27.99	20.7	20.56	19.95	18.69	16.21	18.79	16.17	14.46	17.08	14.78	17.85	19.47	5.51	10.03	7.75
HORVU.MOREX.r3.1HG0034910	TPM	9.97	13.71	12.77	7.57	5.13	5.94	8.07	5.56	7.38	6.28	5.14	9.54	7.97	8.42	11.37	11.87	8.7	9.07	3.25	4.36	4.26
HORVU.MOREX.r3.1HG0034950	TPM	0	0	0	0	0	0	0	0.01	0	0	0	0	0	0	0	0	0	0	0	0	0
HORVU.MOREX.r3.1HG0034970	TPM	33.5	30.74	39	17.8	19.27	15.41	17.83	16.73	17.09	20.13	19.81	19.54	21.9	24.48	24.07	23.15	26.47	26.83	24.06	24.14	30.45
HORVU.MOREX.r3.1HG0034990	TPM	17.11	19.5	21.49	12.9	12.74	13.42	13.64	11.26	11.99	15.27	14.7	14.42	16.28	16.64	15.95	19.04	18.33	14.85	25.6	25.53	31.83
HORVU.MOREX.r3.1HG0035100	TPM	0	0	0	0	0	0	0	0	0	0	0	0	0	0	0	0	0	0	0	0	0
HORVU.MOREX.r3.1HG0035140	TPM	9.87	11.29	12.56	13.35	7.57	9.07	13.93	12.37	13.4	11.52	14.53	16.79	15.89	17.23	16.16	14.31	14.9	18.34	3.94	5.35	8.2
HORVU.MOREX.r3.1HG0035170	TPM	0	0	0	0	0	0	0	0	0	0	0	0	0	0	0	0	0	0	0	0	0
HORVU.MOREX.r3.1HG0035230	TPM	100.25	67.52	79.5	200.25	146.59	141.11	129.27	119.76	127.08	100.83	95.57	119.76	86.52	93.56	88.29	62.99	75.89	97.52	16.09	39.16	29.62
HORVU.MOREX.r3.1HG0035350	TPM	29.26	20.68	22.33	27.46	21.14	25.15	20.36	18.85	22.52	18.15	19.5	21.05	18.26	19.91	21.47	17.99	16.04	21.18	13.31	10.08	11.55
HORVU.MOREX.r3.1HG0035390	TPM	0	0	0	0	0	0	0	0	0	0	0	0	0	0	0	0	0	0	0	0	0
HORVU.MOREX.r3.1HG0035400	TPM	33.98	16.14	22.5	41.48	36.68	38.94	32.73	31.45	32.63	28	25.36	29.42	27.41	29.73	27.35	23.56	25.67	23.29	11.54	13.69	15.58
HORVU.MOREX.r3.1HG0035530	TPM	0	0	0	0	0	0	0	0	0	0	0	0	0	0	0	0	0	0	0	0	0
HORVU.MOREX.r3.1HG0035540	TPM	22.2	17.12	19.81	33	30.92	31.07	31.27	27.78	30.93	27.28	26.59	29.17	29.5	29.51	27.23	23.85	28.43	31.72	14.75	20.34	20.9
HORVU.MOREX.r3.1HG0035550	TPM	0	0.19	0.09	0	0.05	0.06	0	0	0	0	0	0	0	0	0	0	0	0	0.05	0.07	0.12
HORVU.MOREX.r3.1HG0035560	TPM	4.69	3.89	3.6	10.17	8.42	7.5	8.03	8.37	10.12	10.01	10.61	10.5	10.44	9.2	9.34	9.28	9.56	11.18	8.41	7.17	8.27
HORVU.MOREX.r3.1HG0035600	TPM	0	0	0	0	0	0	0	0	0	0	0	0	0	0	0	0.07	0	0	0	0.05	0
HORVU.MOREX.r3.1HG0035650	TPM	0	0	0	0	0	0	0	0	0	0	0	0	0	0	0	0	0	0	0	0	0
HORVU.MOREX.r3.1HG0035690	TPM	50.11	39.15	46.25	73.63	56.81	53.18	50.67	46.82	54.37	45.81	46.98	53.08	49.72	55.93	50.98	39.64	46.84	60.37	15.09	20.25	20.8
HORVU.MOREX.r3.1HG0035720	TPM	0	0	0	0	0	0	0	0	0	0	0	0	0	0	0	0	0	0	0	0	0
HORVU.MOREX.r3.1HG0035740	TPM	0	0	0	0	0	0	0	0	0	0	0	0	0	0	0	0	0	0	0	0	0
HORVU.MOREX.r3.1HG0035750	TPM	0	0	0	0	0	0	0	0	0	0	0	0	0	0	0	0	0	0	0	0	0
HORVU.MOREX.r3.1HG0035760	TPM	0	0	0	0	0	0	0	0	0	0	0	0	0	0	0	0	0	0	0	0	0
HORVU.MOREX.r3.1HG0035770	TPM	0	0	0	0	0	0	0	0	0	0	0	0	0	0	0	0	0	0	0	0	0
HORVU.MOREX.r3.1HG0035870	TPM	0.23	0	0	0	0	0	0	0	0	0	0	0	0	0	0	0	0	0	0	0.25	0
HORVU.MOREX.r3.1HG0035920	TPM	15.23	12.11	13.25	30.18	24.26	23.89	28.76	27.33	28.73	27.58	27.78	31.21	26.69	25.66	25.62	25.66	25.27	34.87	14.92	18.37	16.73
HORVU.MOREX.r3.1HG0035980	TPM	0	0	0	0	0	0	0	0	0	0	0	0	0	0	0	0	0	0	0	0	0
HORVU.MOREX.r3.1HG0036270	TPM	0	0	0	0	0.09	0	0	0	0.1	0	0	0	0	0	0	0	0	0	0	0	0
HORVU.MOREX.r3.1HG0036330	TPM	0	0	0.08	0	0	0	0	0.07	0	0	0	0	0	0	0	0	0.07	2.28	0.06	0	0
HORVU.MOREX.r3.1HG0036370	TPM	68.91	46.28	54.5	55.29	64.51	55.9	57.88	54.67	42.88	46.38	41.56	46.05	37.73	39.52	40.29	38.64	33.54	31.18	26.13	58.49	30.58
HORVU.MOREX.r3.1HG0036380	TPM	0	0	0	0	0	0	0	0	0	0	0	0	0	0	0	0	0	0	0	0	0
HORVU.MOREX.r3.1HG0036390	TPM	41.06	51.63	49.73	38.85	36.7	33.75	31.03	26.62	33.17	34.45	35.05	34.76	31.84	32.07	31.57	40.89	38.68	42.22	36.06	36.9	52.6
HORVU.MOREX.r3.1HG0036400	TPM	5.92	4.6	5.45	14.47	8.69	10.71	14.89	15.37	15.79	12.05	15.39	13.81	16.63	16.09	16.03	16.54	16.54	19.59	3.53	4.05	4.56
HORVU.MOREX.r3.1HG0036440	TPM	2.66	2.45	2.63	2.34	2.57	4.92	2.36	1.57	2.04	1.57	1.86	1.65	1.88	2.84	2.33	2.43	1.83	1.46	1.43	1.74	1.02
HORVU.MOREX.r3.1HG0036480	TPM	92.64	76.52	90.08	114.37	94.89	91.37	87.59	82.28	92.16	77.96	85.07	86.63	72.97	82.27	80.31	67.4	74.24	105.48	40.98	55.95	62.92
HORVU.MOREX.r3.1HG0036490	TPM	0.19	0.57	0.38	0	0	0	0	0	0	0	0	0.09	0	0	0.08	0	0	0	0	0.21	0
HORVU.MOREX.r3.1HG0036530	TPM	0	0	0	0	0	0	0	0	0	0	0	0	0	0	0	0	0	0	0	0	0
HORVU.MOREX.r3.1HG0036600	TPM	59.73	42.34	46.58	79.12	78.44	71.19	71.47	69.95	79.67	70.85	75.93	76.55	76.1	78.53	77.88	74.74	80.57	88.44	49.72	56.92	59.93
HORVU.MOREX.r3.1HG0036620	TPM	0	0	0	0	0	0	0	0	0	0	0	0	0	0	0	0	0	0	0	0	0
HORVU.MOREX.r3.1HG0036630	TPM	0	0	0	0	0	0	0	0	0	0	0	0	0	0	0	0	0	0	0	0	0
HORVU.MOREX.r3.1HG0036660	TPM	29.84	24.03	27.11	57.65	41.83	44.54	74.09	73.92	75.59	71.63	72	74.11	74.39	75.6	70.33	64.92	66.12	74.02	25.64	31.6	29.53
HORVU.MOREX.r3.1HG0036770	TPM	114.58	112.09	111.38	139.68	126.79	125.67	118.16	103.57	118.06	114.78	122	121.47	120.1	114.61	113.37	105.62	113.51	105.8	94.52	105.88	119.75
HORVU.MOREX.r3.1HG0036860	TPM	0	0	0	0	0	0	0	0	0	0	0	0	0	0	0	0	0	0	0.03	0	0
HORVU.MOREX.r3.1HG0036870	TPM	0	0	0	0	0	0	0	0	0	0	0	0.1	0	0	0	0	0	0	0	0	0
HORVU.MOREX.r3.1HG0036930	TPM	45.2	6.41	12.54	144.63	142.29	142.98	163.81	169.63	143.36	104.68	111.09	122.01	93.75	86.59	96.92	85.7	66.28	64.82	11.82	41.58	7.04
HORVU.MOREX.r3.1HG0037010	TPM	0	0	0	0	0	0	0	0	0	0	0	0	0	0	0	0	0	5.88	0.2	0	0
HORVU.MOREX.r3.1HG0037020	TPM	18.86	15.14	15.08	11.72	13.73	12.94	10.27	9.19	11.64	9.24	10.8	9.9	10.05	11.58	10.52	9.08	9.1	11.53	8.26	7.78	12.93
HORVU.MOREX.r3.1HG0037180	TPM	122.13	98.49	107.52	123.72	103.83	103.03	88.57	87.84	95.39	88.41	82.15	88.61	75.76	80.86	79.42	67.56	70.49	79.89	33.88	53.12	47.02
HORVU.MOREX.r3.1HG0037200	TPM	0	0	0	0	0	0	0	0	0	0	0	0	0	0	0	0	0	0	0	0	0
HORVU.MOREX.r3.1HG0037210	TPM	40.16	35.7	40.48	39.89	33.49	34.83	25.64	25.32	28.31	25.67	24.34	27.72	25.73	25.99	26.88	23.55	24.96	35.49	17.77	21.36	27.14
HORVU.MOREX.r3.1HG0037250	TPM	33.62	28.23	31.4	36.07	24.58	28.66	29.45	24.82	27.51	26.97	25.25	33.27	32.35	36.53	35.41	29.29	33.53	45.46	10.15	16.11	16.21
HORVU.MOREX.r3.1HG0037270	TPM	61.42	51.77	62.25	96.63	96.65	83.3	77.81	71.1	84.47	70.06	76.84	78.12	80.67	86.06	80.95	84.3	79.22	94.58	36.03	45.28	47.66
HORVU.MOREX.r3.1HG0037440	TPM	59.69	54.94	54.8	49.75	54.32	45.96	42.04	38.76	42.1	29.46	31.22	31.7	32.11	38.69	35.52	33.14	28.57	32.7	33.23	26.88	37.61
HORVU.MOREX.r3.1HG0037490	TPM	0	0	0	0	0	0	0	0	0	0	0	0	0	0	0	0	0	0	0	0	0
HORVU.MOREX.r3.1HG0037500	TPM	0.21	0.14	0.14	1.63	0.72	1.33	9.9	9.25	10.22	17.13	29.28	27.57	91.7	41.46	53.69	76.1	50.64	54.69	0.31	0.3	0
HORVU.MOREX.r3.1HG0037530	TPM	0	0	0	0	0	0	0	0	0	0	0	0	0	0	0	0	0	0	0	0	0
HORVU.MOREX.r3.1HG0037550	TPM	0	0	0.04	0.05	0	0	0.12	0.06	0.2	0.03	0.31	0	1.07	0.45	0.43	0.62	0.43	0.46	0	0	0.04
HORVU.MOREX.r3.1HG0037560	TPM	0	0	0	0	0	0	0	0	0	0	0	0	0	0	0	0	0	0	0	0	0
HORVU.MOREX.r3.1HG0037610	TPM	36.35	28.48	34.16	37.52	32.72	32.8	35.34	29.86	34.22	35.16	33.54	39.66	38.73	43.29	38.99	35.59	38.99	51.05	15.97	22.08	24.7
HORVU.MOREX.r3.1HG0037620	TPM	4.88	4.77	4.69	3.65	3.72	2.46	2.02	2.82	3.11	3.21	2.28	2.5	2.86	2.92	3.4	2.99	3.23	3.74	2.46	2.65	3.37
HORVU.MOREX.r3.1HG0037640	TPM	0	0	0	0	0	0	0	0	0	0	0	0	0	0	0	0	0	0	0	0	0
HORVU.MOREX.r3.1HG0037670	TPM	3.28	1.99	2.83	5.77	4.65	5.72	8.83	7.27	6.3	10.22	7.79	8.79	10.46	8.6	9.62	11.5	11.62	6.06	6.98	5.53	5.44
HORVU.MOREX.r3.1HG0037710	TPM	1.46	2.93	2.32	1.47	0.9	0.75	1.28	1.8	1.66	1.2	1.16	1.22	1.32	1.28	1.58	0.61	0.83	1.39	0.11	0.41	0.25
HORVU.MOREX.r3.1HG0037770	TPM	8.37	10.55	8.38	5.95	6.7	10.19	4.15	4.88	4.16	4.65	3.61	4.15	4.54	5.24	5.73	4.25	5.39	2.92	8.51	5.44	6.85
HORVU.MOREX.r3.1HG0037780	TPM	7.07	8.94	6.61	8.67	7.29	7.52	8.29	6.94	7.62	7.97	8.18	8.98	8.85	9.76	9.39	8.95	7.15	8.63	1.61	1.56	2.16
HORVU.MOREX.r3.1HG0037800	TPM	72.78	54.89	68.05	62.55	68.12	49.26	48.96	49.06	48.48	44.41	42.73	50.08	40.01	44.52	43.77	39.36	42.25	47.86	15.83	33.47	20.8
HORVU.MOREX.r3.1HG0037890	TPM	0.08	0	0	0.43	0	0.17	0	0	0	0	0	0	0	0	0	0	0	0	0	0.1	0
HORVU.MOREX.r3.1HG0037920	TPM	0.67	1.09	0.54	1.57	2.06	2.54	1.21	1.21	1.41	1.29	0.56	0.79	1.51	0.59	1.38	1.42	1.96	1.4	2.34	3.47	1.46
HORVU.MOREX.r3.1HG0037930	TPM	0	0	0	0	0	0	0	0	0	0	0	0	0	0	0	0	0	0	0	0	0
HORVU.MOREX.r3.1HG0037960	TPM	64.08	43.57	63.65	72.31	88.43	88.15	51.64	47.32	71.52	47.73	45.71	43.59	26.52	36.76	36.99	21.84	19.88	25.7	34.93	40.79	55.02
HORVU.MOREX.r3.1HG0037990	TPM	21.35	18.5	22.58	15.83	20.81	15.69	16.96	16.2	17.01	16.29	16.74	15.78	17.19	17.35	16.56	16.46	20.15	16.88	26.03	39.44	36.61
HORVU.MOREX.r3.1HG0038000	TPM	0.21	0.41	0.2	0.11	0.53	0.34	0.45	0.49	0.26	0.34	0.24	0.26	0.45	0.44	0.72	0.66	0.52	0.46	0.06	0.18	0
HORVU.MOREX.r3.1HG0038010	TPM	0.46	0	0.15	0.2	0.19	0.25	0.19	0.06	0.35	0	0.26	0	0	0.2	0.06	0	0.06	0.11	0	0.25	0
HORVU.MOREX.r3.1HG0038070	TPM	6.7	8.68	11.07	5.09	5.76	3.98	3.17	2.2	3.77	2.49	2.37	2.54	1.79	2.51	2.03	1.43	2.13	2.44	1.84	1.67	2.21
HORVU.MOREX.r3.1HG0038080	TPM	5.66	2.39	3.52	8.14	8.91	6.33	9.03	9.57	8.19	4.84	6.83	6.78	5.62	6.31	8.23	4.47	5.47	6.08	1.7	3.63	1.16
HORVU.MOREX.r3.1HG0038100	TPM	0.78	0.71	1.07	2.22	5.64	4.08	2.8	6.52	7.37	3.98	6.2	4.2	2.59	4.23	3.04	2.18	3.58	3.75	1.35	1.03	4.12
HORVU.MOREX.r3.1HG0038120	TPM	0	0	0.17	0.32	0	0.42	0.16	0.16	0.14	0.1	0	0	0	0.08	0.3	0	0.14	0	0.07	0	0
HORVU.MOREX.r3.1HG0038140	TPM	0	0	0	0	0	0	0	0	0	0	0	0	0	0	0	0	0	0	0	0	0
HORVU.MOREX.r3.1HG0038160	TPM	0	0	0	0	0.22	0.43	0	0.22	0	0	0	0	0.24	0	0.65	0.21	0	1.1	0	0	0
HORVU.MOREX.r3.1HG0038170	TPM	18.64	13.25	16.86	22.35	15.79	16.7	21.78	20.78	22.25	21.15	20.53	28.73	22.97	26.46	26.84	19.25	21.62	29.62	1.71	2.9	1.87
HORVU.MOREX.r3.1HG0038190	TPM	94.93	93.85	97.83	81.08	81.43	65.78	51.51	54.27	59.3	44.67	44.51	49.49	47.4	47.28	47.73	40.8	43.39	48.07	27.99	39.4	40.83
HORVU.MOREX.r3.1HG0038220	TPM	1.06	1.49	0.45	0.39	0.6	2.51	1.68	0.9	0	0.04	0.98	0.44	1.82	0.86	1.42	2.84	2.57	1.18	0.75	1.46	0.84
HORVU.MOREX.r3.1HG0038230	TPM	1.91	0.5	1.97	2.24	2.18	0.99	0.79	0.8	2.41	1.65	1.56	1.3	0.67	1.24	1.01	0.35	0.7	1.03	0.12	0.33	0.27
HORVU.MOREX.r3.1HG0038240	TPM	1.04	0	0.58	1.64	0.92	1.12	0.5	0.31	0.9	1.14	0.67	0.69	1	0.54	0.59	1.47	1.1	0.28	0	0.82	0.6
HORVU.MOREX.r3.1HG0038460	TPM	0	0	0	0	0	0	0	0	0	0	0	0	0	0	0	0	0	0	0	0	0
HORVU.MOREX.r3.1HG0038470	TPM	0	0	0	0	0	0	0	0	0	0	0	0	0	0	0	0.14	0	0	0	0	0
HORVU.MOREX.r3.1HG0038550	TPM	4.14	3.54	4.31	7.87	6.75	5.95	6.63	4.95	5.76	4.91	5.75	7.32	6.27	4.68	4.98	5.83	5.14	7.92	3.73	5.14	3.68
HORVU.MOREX.r3.1HG0038580	TPM	0	0	0	0	0	0	0	0	0	0	0	0	0	0	0	0	0	0	0	0	0
HORVU.MOREX.r3.1HG0038590	TPM	63.62	113.62	74.44	33	37.05	46.86	23.48	20.88	18.12	31.98	15.47	20.37	25.53	24.61	25.17	49.53	30.42	29.84	55.84	37.69	55.72
HORVU.MOREX.r3.1HG0038600	TPM	0	0	0	0	0	0	0	0	0	0	0	0	0	0	0	0	0	0	0	0	0
HORVU.MOREX.r3.1HG0038620	TPM	0.25	0.3	0.36	0.2	0.62	0.72	0.31	0.31	0.28	0.33	0.15	0.35	0.14	0.35	0.18	0.32	0.08	0.21	0.29	0.79	1.71
HORVU.MOREX.r3.1HG0038630	TPM	0	0.06	0	0	0.05	0.08	0.03	0	0	0.1	0.03	0.17	0.2	0.08	0.05	0.07	0.05	0.09	0	0.17	0.07
HORVU.MOREX.r3.1HG0038640	TPM	1.31	0.93	0.93	3.26	1.56	2.28	3.42	3.78	3.83	2.94	4.46	4.62	5.33	5.6	5.15	6.02	5.52	6.06	1.06	1.46	1.2
HORVU.MOREX.r3.1HG0038650	TPM	0	0	0	0	0	0	0	0	0	0	0	0	0	0	0	0	0	0	0	0	0
HORVU.MOREX.r3.1HG0038710	TPM	0	0	0	0	0	0	0	0	0	0	0	0	0	0	0	0	0	0	0	0	0
HORVU.MOREX.r3.1HG0038720	TPM	0.46	0.11	0.23	0.59	0.19	0.56	1.25	0.87	0.52	0.57	0.78	0.61	0.94	1.72	1.04	1.1	1.06	0.64	0.17	0.62	0.25
HORVU.MOREX.r3.1HG0038740	TPM	0	0	0	0	0	0	0	0	0	0	0	0	0	0	0	0	0.17	0	0	0	0
HORVU.MOREX.r3.1HG0038750	TPM	0.1	0	0.05	2.21	0.66	2.34	1.17	1.35	0.66	0.39	0.57	0.56	0.8	0.78	0.56	0.83	0.79	1.24	0	0.06	0.06
HORVU.MOREX.r3.1HG0038760	TPM	0	0	0	0	0	0	0	0	0	0	0	0	0	0	0	0	0	0	0	0	0
HORVU.MOREX.r3.1HG0038780	TPM	0	0	0	0	0	0	0	0	0	0	0	0	0	0	0	0	0	0	0	0	0
HORVU.MOREX.r3.1HG0038790	TPM	2.29	1.52	2.36	0.88	1.01	1.37	1.22	1.22	1.01	0.92	0.9	1.3	0.62	0.68	1.1	1.17	1.01	0.36	0.47	0.69	0.56
HORVU.MOREX.r3.1HG0038800	TPM	2.47	1.19	0.56	5.37	3.78	5.79	2.88	2.83	3.25	3.35	2.54	3.12	2.86	3.84	2.58	2.87	3.58	2.72	0.25	0.32	2.15
HORVU.MOREX.r3.1HG0038820	TPM	0	0	0	0	0	0	0	0	0	0	0	0	0	0	0	0	0.1	0	0	0	0
HORVU.MOREX.r3.1HG0038900	TPM	2.3	2.07	2.03	3.68	1.9	2.21	2.47	1.75	2.58	2.89	2.53	3.26	2.42	3.61	2.84	2.74	2.72	4.29	0.97	1.29	1.87
HORVU.MOREX.r3.1HG0038930	TPM	2.45	4.62	2.33	6.19	12.41	8.11	4.47	2.75	2.43	9.65	2.96	4.13	4.96	6.75	2.36	8.33	9.09	9.32	0.65	1.41	7.81
HORVU.MOREX.r3.1HG0038960	TPM	3.86	3.36	3.8	8.11	5.3	6.48	11.16	9.72	9.93	8.94	11.16	10.99	13.91	12.35	12.7	13.14	12.13	16.21	2.86	4.07	2.21
HORVU.MOREX.r3.1HG0038980	TPM	3.48	3.46	4.76	2.42	2.92	3.42	3.85	3.21	3.08	3.56	3.42	4.26	3.41	3.84	4.41	2.72	3.21	3.65	2.38	2.88	2.98
HORVU.MOREX.r3.1HG0038990	TPM	9.48	8.04	5.42	7.1	6.74	5.02	8.39	5.34	8.36	4.92	7.43	9.3	7.43	10.27	9.48	5.25	7.23	15.15	9.51	10.15	7.61
HORVU.MOREX.r3.1HG0039000	TPM	32.12	26.07	29.85	51.44	46.83	40.74	40.14	43.52	43.58	37.72	37.11	41.31	31.01	29.74	34.36	31.33	27.72	24.71	30.76	37.2	27.65
HORVU.MOREX.r3.1HG0039050	TPM	0.07	0	0.06	0.08	0	0.05	0.27	0.17	0.06	0.44	0.06	0.29	0.18	0.17	0.49	0.37	0.22	0.28	0	0	0
HORVU.MOREX.r3.1HG0039060	TPM	0	0	0	0	0	0	0	0	0	0	0	0	0	0	0	0	0	0	0.05	0.07	0
HORVU.MOREX.r3.1HG0039070	TPM	0	0	0	0	0	0	0	0	0	0	0	0	0	0	0	0	0	0	0	0	0
HORVU.MOREX.r3.1HG0039090	TPM	0	0	0	0	0	0	0	0	0	0	0	0	0	0	0	0	0	0	0	0	0
HORVU.MOREX.r3.1HG0039110	TPM	6.93	6.13	6.62	18.35	15.48	16.39	10.28	11.1	15.58	10.48	8.75	9.7	12.14	11	10.67	10.83	11.1	12.52	2.05	4.39	5.6
HORVU.MOREX.r3.1HG0039130	TPM	0	0	0	0	0	0	0	0	0	0	0	0	0	0	0	0	0	0	0	0	0
HORVU.MOREX.r3.1HG0039150	TPM	0	0	0	0	0	0	0	0	0	0	0	0	0	0	0	0	0	0	0	0	0
HORVU.MOREX.r3.1HG0039160	TPM	61.51	102.89	77.14	14.29	20.67	17.66	5.29	6.31	10.29	16.25	9.55	12.03	6.68	7.14	8.6	53.23	12.58	8.14	18.33	7.02	8.51
HORVU.MOREX.r3.1HG0039170	TPM	0	0	0	0	0	0	0	0	0	0	0	0	0	0	0	0	0	0	0	0	0
HORVU.MOREX.r3.1HG0039180	TPM	0	0	0	0.01	0	0	0	0	0	0	0	0	0	0	0	0	0	0	0	0	0
HORVU.MOREX.r3.1HG0039190	TPM	10.27	7.78	8.54	17.24	11.98	10.75	15.52	12.15	14.83	13.47	13.27	16.43	14.93	17.39	14.83	11.15	14.75	20.11	4.82	5.1	7.13
HORVU.MOREX.r3.1HG0039210	TPM	0	0	0	0	0	0	0	0	0	0	0	0	0	0	0	0	0	0	0	0	0
HORVU.MOREX.r3.1HG0039220	TPM	0	0	0	0	0	0	0	0	0	0	0	0	0	0	0	0	0	0	0	0	0
HORVU.MOREX.r3.1HG0039230	TPM	13.65	10.87	11.7	17.93	14.25	17.55	24.36	22.36	21.96	20.89	24.65	26.08	20.61	19.46	23.56	18.97	17.75	19.78	8.52	10.63	7.44
HORVU.MOREX.r3.1HG0039240	TPM	16.23	31.32	22.62	2.33	5.36	3.48	1.14	1.99	1.78	3.16	1.62	1.95	1.98	2.02	1.71	1.69	3.42	2.54	11.68	18.43	31.87
HORVU.MOREX.r3.1HG0039350	TPM	106.07	91.84	104.69	112.56	98.65	91.99	99.9	92.79	111.49	89.75	104.58	93.94	89.82	98.42	93.22	82.82	89.38	114.8	91.62	127.43	123.67
HORVU.MOREX.r3.1HG0039360	TPM	0	0	0	0	0	0	0	0	0	0	0	0	0.21	0	0	0	0	0	0	0	0
HORVU.MOREX.r3.1HG0039370	TPM	34	26.61	30.38	53.23	46.91	43.26	37.51	36.91	45.68	35.84	41.38	39.8	37.49	40.11	38.18	33.14	38.24	38.89	17.99	29.77	29.21
HORVU.MOREX.r3.1HG0039410	TPM	0	0	0	0	0	0	0	0	0	0	0	0	0	0	0	0	0	0	0	0	0
HORVU.MOREX.r3.1HG0039430	TPM	0	0	0	0	0.45	0	0	0	0	0	0	0	0	0	0	0.23	0	0	0.04	0.61	0
HORVU.MOREX.r3.1HG0039450	TPM	0	0	0	0	0	0	0	0	0	0	0	0	0	0	0	0	0	0	0	0	0
HORVU.MOREX.r3.1HG0039460	TPM	0	0	0	0	0	0	0	0	0	0	0	0	0	0	0	0	0	0	0	0	0
HORVU.MOREX.r3.1HG0039490	TPM	0	0	0	0	0	0	0	0	0	0	0	0	0	0	0	0	0	0	0	0	0
HORVU.MOREX.r3.1HG0039560	TPM	0	0	0	0	0	0	0	0	0	0	0	0	0	0	0	0	0	0	0	0	0
HORVU.MOREX.r3.1HG0039590	TPM	0	0	0	0	0	0	0	0	0	0	0	0	0	0	0	0	0	0	0	0	0
HORVU.MOREX.r3.1HG0039670	TPM	55.84	42.01	45.84	48.71	52	50.73	46.6	43.5	41.94	40.04	45.87	45.41	46.27	46.43	50.06	48.86	44.26	42.74	12.06	25.35	17.46
HORVU.MOREX.r3.1HG0039730	TPM	56.86	40.59	46.26	79.21	67.07	56.5	80.94	80.87	93.66	107.51	99.56	109.37	87.08	99.07	86.97	69.88	88.46	121.27	31.94	51.05	47.45
HORVU.MOREX.r3.1HG0039740	TPM	7.29	9.67	8.93	11.56	9.7	10.58	14.64	13.68	16.04	21.36	23.93	24	30.35	24.96	23.12	26.03	34.16	42.91	6.65	10.01	12.07
HORVU.MOREX.r3.1HG0039840	TPM	230.97	233.33	250.23	170.71	226.78	188.78	138.62	152.92	174.32	131.09	128.48	120.2	106.87	110.77	134.09	107.94	85.78	81.06	30.31	61.52	64.06
HORVU.MOREX.r3.1HG0039860	TPM	28.47	26.11	32.25	24.39	18.11	17.27	13.88	11.65	14.9	15.46	12.91	20.39	12.86	16.64	14.81	11.65	14.86	20.81	6.18	8.25	5.73
HORVU.MOREX.r3.1HG0039870	TPM	0	0	0	0	0	0	0	0	0	0	0	0	0	0	0	0	0	0	0	0	0
HORVU.MOREX.r3.1HG0039900	TPM	0	0	0.02	0	0	0	0	0	0.01	0	0	0	0	0	0	0	0	0	0	0.12	0
HORVU.MOREX.r3.1HG0039910	TPM	37.33	29.8	31.73	38.39	45.55	34.43	29.3	28.73	28.69	25.62	26.35	26.62	26.37	24.16	25.07	24.37	24.15	24.38	15.41	23.06	23.22
HORVU.MOREX.r3.1HG0039920	TPM	0.4	0.26	0.17	1.32	1.09	1.6	0.93	0.97	0.85	0.85	0.34	0.48	0.61	0.31	0.66	0.53	0.45	0.12	0.13	0.29	0.1
HORVU.MOREX.r3.1HG0039930	TPM	0.79	0.98	0.83	3.28	1.32	2.32	6.4	5.24	4.37	3.88	4.19	4.61	4.5	4.12	5.56	3.41	3.1	2.18	1.24	1.53	1.94
HORVU.MOREX.r3.1HG0039940	TPM	50.73	49.9	48.29	72.37	70.46	62.54	63.03	56.7	66.59	51.06	58.93	56.66	52.45	49.09	54.19	47.55	47.75	60.96	46.62	58.13	58.95
HORVU.MOREX.r3.1HG0039960	TPM	36.98	29.6	36.12	38.43	31.13	31.06	29.22	25.83	33.87	29.11	31.78	35.24	42.32	40.19	38.91	39.88	38.04	44.24	21.59	24.04	30.31
HORVU.MOREX.r3.1HG0039980	TPM	0	0	0	0	0	0	0	0	0	0	0	0	0	0	0	0	0	0	0	0	0
HORVU.MOREX.r3.1HG0040000	TPM	26.98	14.4	16.01	60.52	36.74	49.17	75.03	67.73	65.72	70.29	77.59	82.43	63.71	61.33	67	50.82	52.9	53.2	13.81	25.92	16.82
HORVU.MOREX.r3.1HG0040050	TPM	20.26	20.03	18.94	23.37	14.19	16.35	17.07	15.11	17	16.11	14.35	18.22	17.25	17.48	19.12	15.08	17.32	23.86	5.09	9.46	7.66
HORVU.MOREX.r3.1HG0040100	TPM	9.56	13.66	12.83	6.26	7.46	6.4	6.92	6.42	6.55	5.74	6.15	6.73	10.12	12.77	12.23	12.72	10.39	8.71	10.51	7.45	9.85
HORVU.MOREX.r3.1HG0040110	TPM	0.06	0	0	0	0	0	0	0	0	0	0	0	0	0	0	0	0	0	0	0	0.13
HORVU.MOREX.r3.1HG0040190	TPM	1.95	0.95	1.67	3.12	1.02	1.79	1.22	1.84	2.42	0.4	1.84	1.08	2.2	1.5	1.4	2.14	0.41	2.37	0.18	1.05	0
HORVU.MOREX.r3.1HG0040220	TPM	7.71	5.75	8.26	15.5	13.44	13.16	10.17	8.44	10.69	9.95	9.97	12.86	14.85	11.01	12.03	11.3	11.11	12.17	5.16	5.95	7.78
HORVU.MOREX.r3.1HG0040350	TPM	0	0.78	0	0	0	0	0	0	0.21	0	0	0	0.22	0	0.41	0	0	0	0	0	0
HORVU.MOREX.r3.1HG0040360	TPM	0.38	0.29	0.15	0.19	0.72	1.16	0.62	0.41	0.24	0.49	0.31	0.76	0.64	0.62	0.43	0.69	0.5	0.57	0.08	0.36	0.16
HORVU.MOREX.r3.1HG0040370	TPM	0	0	0	0	0	0.05	0	0	0	0	0	0	0	0	0	0	0	0	0	0	0
HORVU.MOREX.r3.1HG0040380	TPM	0	0	0	0	0	0	0	0	0	0	0	0	0	0	0	0	0	0	0	0	0
HORVU.MOREX.r3.1HG0040400	TPM	1.02	0.96	0.85	0.53	1.88	1.48	0.38	0.54	0.21	0.41	0.1	0.3	0.31	0.36	0.31	0.27	0.35	0.32	0.27	0.85	0.16
HORVU.MOREX.r3.1HG0040550	TPM	1.07	1.7	1.51	1.73	1.22	1.81	2.49	2.99	4.1	4.87	3.17	4.8	3.49	4.66	3.5	3.7	3.72	4.04	7.34	6.75	4.95
HORVU.MOREX.r3.1HG0040570	TPM	2.77	1.46	1.95	16.64	7.09	9.5	28.91	29.74	30.37	23.71	34.48	34.53	36.61	34.81	40.25	37.27	32.26	50.31	0.52	2.06	0.23
HORVU.MOREX.r3.1HG0040600	TPM	0	0.06	0	0.08	0	0	0	0	0.05	0	0.05	0.05	0	0.05	0	0.05	0	0	0	0	0.26
HORVU.MOREX.r3.1HG0040610	TPM	284.51	191.12	240.44	336.12	306.43	222.09	183.15	162.01	162.58	120.22	107.79	133.28	84.86	89.11	94.44	72.84	75.33	93.5	35.27	85.91	36
HORVU.MOREX.r3.1HG0040640	TPM	33.06	35.52	38.66	17.8	16.36	13.05	10.89	10.92	13.83	14.63	15	13.57	14.3	15.78	16.52	13.34	16.19	18.37	13.82	16.76	13.04
HORVU.MOREX.r3.1HG0040680	TPM	0.57	0.92	0.64	0.48	1.86	1.61	0.7	1.53	2.5	1.63	3.2	1.87	1.48	2.22	1.66	1.24	2.32	1.9	0.2	0.2	0.92
HORVU.MOREX.r3.1HG0040690	TPM	0	0	0	0.01	0	0	0	0	0	0	0	0	0	0	0	0	0	0	0	0	0
HORVU.MOREX.r3.1HG0040700	TPM	0	0	0	0	0	0	0	0	0	0	0.06	0	0	0	0	0	0	0	0	0	0
HORVU.MOREX.r3.1HG0040760	TPM	0	0	0	0	0	0	0	0	0	0	0	0	0	0	0	0	0	0	0	0	0
HORVU.MOREX.r3.1HG0040770	TPM	0	0	0	0	0	0	0	0	0	0	0	0	0	0	0	0	0	0	0	0	0
HORVU.MOREX.r3.1HG0040790	TPM	8.11	6.92	11.31	23.64	13.72	11.31	53.6	49.26	53.96	49.25	55.12	48.39	76.97	77.86	54.54	66.14	88.42	110.66	37.63	32.66	65.26
HORVU.MOREX.r3.1HG0040800	TPM	10.1	9.63	8.62	7.82	10.95	10.77	8.57	7.96	10.12	8.68	8.56	7.72	8.07	5.75	8.29	8.03	10.32	6.94	13.09	9.36	12.57
HORVU.MOREX.r3.1HG0040810	TPM	0.1	0	0.25	0.26	0.3	0.34	0.04	0.09	0.09	0	0.04	0.09	0	0.05	0	0.04	0	0	0	0	0
HORVU.MOREX.r3.1HG0040830	TPM	24.09	20.95	24.3	24.33	21.32	19.17	23.11	21.14	24.59	23.41	25.69	24.29	26.65	27.54	27.58	25.05	29.41	36.76	12.99	18.48	20.98
HORVU.MOREX.r3.1HG0040850	TPM	0	0	0	0	0	0	0	0	0	0	0	0	0	0	0	0	0	0	0	0	0
HORVU.MOREX.r3.1HG0040860	TPM	64.27	64.15	68.76	65.59	56.25	49.89	78.37	74.1	81.21	80.39	99.93	93.33	104.26	107.84	111.39	113.39	107.51	130.1	39.29	49.57	54.72
HORVU.MOREX.r3.1HG0040880	TPM	0.03	0.1	0.06	0	0.19	0.4	0.03	0.03	0.06	0.13	0	0.03	0.12	0.06	0.08	0.16	0.08	0	0.07	0.1	0.11
HORVU.MOREX.r3.1HG0040900	TPM	7.18	6.88	6.18	7.34	6.55	6.96	7.59	7.54	7.97	6.28	6.6	7.3	6.8	7.47	7.9	7.17	7.79	10.81	5.2	6.02	10.03
HORVU.MOREX.r3.1HG0040950	TPM	0	0	0	0	0	0	0	0	0	0	0	0	0	0	0	0	0	0	0.08	0	0
HORVU.MOREX.r3.1HG0040960	TPM	0	0.04	0	0	0.03	0.06	0.03	0	0	0	0.03	0.06	0.03	0	0.03	0	0	0.05	0	0	0.04
HORVU.MOREX.r3.1HG0040970	TPM	0	0	0	0	0	0	0	0	0	0	0	0	0	0	0	0	0	0	0	0	0
HORVU.MOREX.r3.1HG0040990	TPM	0.88	0.39	0.19	1.79	2.42	5.55	1.03	1.2	0.97	0.76	0.6	0.71	0.61	0.91	0.85	0.48	0.53	0.5	0.23	0.86	0.39
HORVU.MOREX.r3.1HG0041010	TPM	20.29	16.15	18.97	27.38	21.62	27.23	22.7	23.06	24.08	25.21	24.1	25.52	26.94	26.68	27.75	26.19	24.4	32.64	14.71	17.79	18.61
HORVU.MOREX.r3.1HG0041030	TPM	1.51	0.69	1.08	2.44	1.69	3.42	2.58	2.93	2.62	3.22	2.94	2.84	2.71	2.19	2.8	1.52	2.51	1.4	1.88	1.4	1.42
HORVU.MOREX.r3.1HG0041060	TPM	202.37	166.75	196.35	226.48	223.26	191.47	176.41	168.3	177.21	149.69	151.67	168.7	133.72	140.36	139.94	134.17	129.82	140.72	41.53	97.74	66.1
HORVU.MOREX.r3.1HG0041070	TPM	0.25	0.05	0.05	0.06	0	0	0	0	0	0.04	0	0	0	0	0	0.04	0	0.07	0.04	0	0.16
HORVU.MOREX.r3.1HG0041120	TPM	2.43	1.82	2.54	2.14	2.66	1.97	1.7	2.18	1.18	2.46	0.63	2.31	0.84	2.61	1.53	2.67	1.4	0.78	0.4	0.4	0.81
HORVU.MOREX.r3.1HG0041130	TPM	0.46	0.78	0.61	0.36	0.19	0.51	0.52	0.24	0.36	0.38	0.52	0.4	0.36	0.3	0.47	0.36	0.33	0.55	0.21	0	0.12
HORVU.MOREX.r3.1HG0041150	TPM	0.16	0.32	0.32	0.28	0.05	0.66	0	0.05	0.05	0.04	0.05	0.05	0	0.05	0.18	0.04	0.09	0.08	0	0	0
HORVU.MOREX.r3.1HG0041190	TPM	0	0	0	0	0	0	0	0	0	0	0	0	0	0	0	0	0	0	0	0	0
HORVU.MOREX.r3.1HG0041200	TPM	0	0	0.05	0	0	0	0	0	0	0	0	0	0	0	0	0	0	0	0	0	0
HORVU.MOREX.r3.1HG0041230	TPM	0.43	0	0	1.1	0.72	2.45	1.07	0	0.39	0	0	1.14	0	0.38	0.35	0	0.72	0	0	0	0
HORVU.MOREX.r3.1HG0041250	TPM	15.8	9.88	12.3	27.31	22.27	21.22	24.19	21.54	24.92	19.48	18.73	20.99	20.29	20.69	18.74	18.29	21.06	21.89	8.37	15.2	11.18
HORVU.MOREX.r3.1HG0041260	TPM	189.95	144.88	153.43	268.93	235.24	220.65	240.73	238.73	238	202.52	206.42	216.22	172.29	166.71	178.06	161.19	152.27	190.14	159.12	221.72	173.64
HORVU.MOREX.r3.1HG0041280	TPM	1.91	1.27	1.04	7.14	5.72	6.8	6.76	7.67	4.59	5.48	4.41	5.57	2.79	3.37	3.84	2.65	2.72	1.96	0.27	1.93	1.08
HORVU.MOREX.r3.1HG0041380	TPM	0	0	0	0	0	0	0.08	0	0	0	0	0.09	0	0	0	0	0	0	0	0	0
HORVU.MOREX.r3.1HG0041410	TPM	0	0	0	0	0	0	0	0	0	0	0	0	0	0	0	0	0	0	0	0	0
HORVU.MOREX.r3.1HG0041440	TPM	44.95	52.42	49.93	25	29.11	27.53	7.52	6.35	6.72	7.23	5.32	7.12	7.29	7.46	6.01	7.92	7.82	5.99	7.6	15.91	14.93
HORVU.MOREX.r3.1HG0041490	TPM	0	0	0	0	0.12	0	0	0	0	0	0	0	0	0	0	0	0	0.19	0	0	0
HORVU.MOREX.r3.1HG0041500	TPM	0.11	0.22	0.44	0.87	0.28	0.28	0.47	1.89	1.43	0.65	1.89	0.9	0.71	0.89	0.09	0.09	0.28	0.79	0.16	0.24	0
HORVU.MOREX.r3.1HG0041510	TPM	0.51	0.12	0.24	1.02	0.8	0.9	0.94	1.21	1.13	0.74	0.77	0.86	0.93	0.93	1.06	0.6	0.81	0.36	0	0.56	0.27
HORVU.MOREX.r3.1HG0041520	TPM	0	0	0	0	0	0	0	0	0	0	0	0	0	0	0	0	0	0	0	0	0
HORVU.MOREX.r3.1HG0041550	TPM	0.08	0.02	0.06	0.02	0.06	0.07	0.04	0.04	0.01	0.03	0.04	0.06	0.01	0.01	0.01	0.05	0.07	0.05	0	0.05	0
HORVU.MOREX.r3.1HG0041560	TPM	38.99	32.11	35.26	44.49	32.98	42.95	42.1	40.02	40.33	45.41	49.75	47.28	53.14	52.92	51.19	53.06	59.75	77.53	26.76	40.31	41.31
HORVU.MOREX.r3.1HG0041570	TPM	0	0	0	0	0	0	0	0	0	0	0	0	0	0	0	0	0	0	0	0	0
HORVU.MOREX.r3.1HG0041580	TPM	3.19	3.9	3.43	3.29	2.86	4.12	3.4	3.12	3.79	5.34	4.53	4.84	7.51	6.78	5.68	6	8.05	7.62	1.31	0.86	1.5
HORVU.MOREX.r3.1HG0041600	TPM	2.8	2.13	2.25	9.82	18.48	19.52	10.35	13.38	14.83	17.41	18.59	17.03	17.55	22.03	21.94	25.15	22.89	17.63	3.84	10.18	8.56
HORVU.MOREX.r3.1HG0041630	TPM	2.53	1.86	1.76	1.62	1.52	2.93	1.24	2.43	1.37	1.88	1.14	2.24	2.54	3.15	3.27	2.47	2.88	2.82	0.82	2.07	1.86
HORVU.MOREX.r3.1HG0041660	TPM	0	0	0	0	0	0	0	0	0	0	0	0	0	0	0	0	0	0	0	0	0
HORVU.MOREX.r3.1HG0041670	TPM	0	0	0	0.01	0	0	0	0	0	0	0	0	0.06	0	0	0	0	0	0	0	0
HORVU.MOREX.r3.1HG0041680	TPM	169.99	184.95	197.33	131.09	134.03	110.7	114.8	107.26	111.83	96.26	106.84	105.9	95.27	93.16	98.28	88.64	99.52	69.55	59.64	83.06	87.96
HORVU.MOREX.r3.1HG0041700	TPM	0.93	0.99	0.83	1.37	1.21	2.09	0.75	1	0.93	1.43	0.43	0.54	1.07	0.97	0.58	0.63	0.99	1.26	0.43	0.77	1.13
HORVU.MOREX.r3.1HG0041710	TPM	0	0	0	0.04	0	0	0.02	0.02	0.05	0	0.05	0.03	0.05	0.03	0.02	0.05	0	0	0	0	0
HORVU.MOREX.r3.1HG0041720	TPM	0.23	0.25	0.11	1.77	1.83	1.61	5.84	3.19	4.38	6.84	6.16	5.83	10.22	9.52	9.66	9.81	14.12	14.53	0	0.79	0.4
HORVU.MOREX.r3.1HG0041780	TPM	0	0	0	0	0	0	0	0	0	0.1	0	0	0	0	0	0	0	0	0	0	0
HORVU.MOREX.r3.1HG0041820	TPM	66.29	60.71	66.13	107.91	86.95	106.87	130.74	130.47	124.35	131.26	130.26	127.9	130.06	142.06	122.3	144.77	134.88	163.77	157.28	176.12	175.23
HORVU.MOREX.r3.1HG0041830	TPM	26.64	21.62	23.05	30.49	25.95	21.73	25.56	24.68	25.97	23.34	23.58	25.76	23.53	23.95	23.68	19.5	22.7	29.18	8.02	11.36	11.27
HORVU.MOREX.r3.1HG0041960	TPM	0	0	0	0	0	0	0	0	0	0	0	0	0	0	0	0	0	0	0	0	0
HORVU.MOREX.r3.1HG0041970	TPM	0	0	0	0	0	0.1	0	0	0.34	0	0.32	0	0.46	0	0.36	0.71	0.42	0.35	0	0	0
HORVU.MOREX.r3.1HG0041980	TPM	24.34	15.91	23.03	31.97	24.69	27.04	23.48	21.35	23.26	18.6	18.07	21	19.43	18.76	19.51	16.47	16.25	21.46	6.27	11.56	11.55
HORVU.MOREX.r3.1HG0042040	TPM	0	0	0	0	0	0	0	0	0	0	0	0	0	0	0	0	0	0	0	0	0
HORVU.MOREX.r3.1HG0042060	TPM	9.33	8.55	11.75	5.96	8.07	6.64	5.71	6.65	5.99	6.88	6.1	6.03	5.12	5.96	5.88	6.11	5.7	5.38	13.09	12.62	15.39
HORVU.MOREX.r3.1HG0042080	TPM	2.65	1.83	2.76	2.02	2.25	3.85	1.43	1.8	1.93	1.41	0.39	1.3	1.18	1.68	2.34	1.83	1.48	2.74	1.63	0.95	3.98
HORVU.MOREX.r3.1HG0042090	TPM	0.21	0	0.2	0	0	0	0	0	0	0	0	0	0	0	0	0	0	0	0.15	0.23	0
HORVU.MOREX.r3.1HG0042100	TPM	15.75	12.3	14.29	21.11	20.8	17.92	14.42	13.82	14.38	10.15	10.61	11.22	13.76	11.64	12.49	11.63	10.02	10.98	0.97	3.72	2.49
HORVU.MOREX.r3.1HG0042110	TPM	1.75	2.17	1.75	6.65	6.13	6.27	3.26	3.24	3.38	2.42	1.72	2.42	2.58	1.94	2.7	1.53	3.49	1.84	0.46	1.65	1.25
HORVU.MOREX.r3.1HG0042120	TPM	15.66	11.35	11.39	17.3	16.29	13.65	13.48	11.88	15.29	12.63	13.31	14.36	13.29	14.2	12.63	11.67	12.42	15.64	9.52	10.08	11.38
HORVU.MOREX.r3.1HG0042190	TPM	0	0	0	0	0	0	0	0	0	0	0	0	0	0	0	0	0	0	0	0	0
HORVU.MOREX.r3.1HG0042200	TPM	2.02	1.11	0.9	3.8	5.5	4.57	5.03	3.76	3.53	2.52	1.8	2.76	3.56	2.49	2.76	3.43	2.48	1.88	1.46	0.92	0.43
HORVU.MOREX.r3.1HG0042220	TPM	0	0	0	0	0	0	0	0	0	0	0	0	0	0	0	0	0	0	0	0	0
HORVU.MOREX.r3.1HG0042230	TPM	52.95	52.99	51.28	53.85	39.62	44.25	58.86	58.67	61.93	76.92	71.21	85.86	68.44	59.08	57.08	60.73	77.08	85.29	29.39	43.42	38.75
HORVU.MOREX.r3.1HG0042290	TPM	0.46	0.65	0.79	0.35	0.27	0.34	0.17	0.08	0.1	0.13	0.07	0.06	0.23	0.13	0.07	0.05	0.19	0.57	0.01	0	0.07
HORVU.MOREX.r3.1HG0042320	TPM	28.94	21.37	26.49	69.17	39.99	46.09	70.23	64.05	68.85	67.4	61.49	76.36	61.81	67.68	66.36	52.21	63.56	85.26	18.62	29.34	26.13
HORVU.MOREX.r3.1HG0042370	TPM	0.07	0.28	0.35	0.27	0.77	0.86	0.35	0.47	0.13	0.7	0.3	0.5	0.64	0.43	0.29	1.13	0.95	0.99	0.1	2.43	0.39
HORVU.MOREX.r3.1HG0042380	TPM	0	0	0	0	0	0	0	0	0	0	0	0	0	0	0	0	0	0	0	0	0
HORVU.MOREX.r3.1HG0042400	TPM	0	0	0	0	0	0	0	0	0	0	0	0	0	0	0	0	0	0	0	0	0
HORVU.MOREX.r3.1HG0042420	TPM	30.91	21.95	28.78	40.55	34.23	28.56	28.57	27.55	26	22.56	20.38	26.22	20.99	21.62	21.24	16.23	18.2	21.32	7.38	12.66	9.39
HORVU.MOREX.r3.1HG0042440	TPM	0	0.02	0.02	0.16	0.14	0.34	0.22	0.39	0.35	0.28	0.27	0.41	0.51	0.45	0.4	0.43	0.45	0.38	0.02	0.03	0
HORVU.MOREX.r3.1HG0042470	TPM	0	0	0	0	0	0	0	0	0	0	0	0	0	0	0	0	0	0	0	0	0
HORVU.MOREX.r3.1HG0042510	TPM	14.36	11.51	11.67	7.63	15.36	18.18	4.39	5.08	5.44	3.3	2.19	3.34	4.64	4.81	4.5	9.54	5.28	5.55	5.66	4.23	4.87
HORVU.MOREX.r3.1HG0042530	TPM	0	0	0	0	0	0	0	0	0	0	0	0	0	0	0	0	0	0	0	0	0
HORVU.MOREX.r3.1HG0042590	TPM	0	0	0	0	0	0	0	0	0	0	0	0	0	0	0	0	0	0	0	0	0
HORVU.MOREX.r3.1HG0042600	TPM	0	0	0	0	0	0	0	0	0	0	0	0	0	0	0	0	0	0	0	0	0
HORVU.MOREX.r3.1HG0042620	TPM	1.42	1.2	1.95	1.4	1.41	1.31	0.75	0.54	1.16	0.85	0.81	1.03	0.7	0.56	0.64	0.62	0.86	1.53	0.93	1.11	0.7
HORVU.MOREX.r3.1HG0042720	TPM	0	0.05	0	0	0	0	0	0	0	0	0	0.09	0	0	0	0.16	0.08	0	0	0	0
HORVU.MOREX.r3.1HG0042740	TPM	94.89	70.05	76.18	90.68	88.45	81.42	72.87	69.11	75.58	71.65	64.37	72.57	62.18	66.45	66.34	59.96	60.12	69.49	61.17	66.3	72.2
HORVU.MOREX.r3.1HG0042750	TPM	4.97	5.8	7.94	6.35	4.64	5.91	3.81	2.68	3.43	4.21	5.23	3.27	3.6	3.1	4.14	4.81	4.71	5.56	8.33	12.5	12.59
HORVU.MOREX.r3.1HG0042770	TPM	32.42	27.42	27.95	35.57	31.44	29.67	34.17	37.49	45.25	47.58	45.22	46.04	50.38	49.54	46.09	47.59	52.87	61.07	40.9	52.84	62.86
HORVU.MOREX.r3.1HG0042860	TPM	0.77	0.32	0.54	0.71	0.65	1.57	0.78	0.83	0.5	0.86	0.83	0.83	0.9	1.54	1.22	0.88	1.38	1.15	0.84	0.53	1.02
HORVU.MOREX.r3.1HG0042870	TPM	134.41	113.39	126.91	129.47	112.37	105.93	85.93	75.15	81.81	66.18	65.75	73.07	67.15	73.35	63	64	65.12	80.58	54.09	63.51	70.53
HORVU.MOREX.r3.1HG0042920	TPM	6.65	5.74	6.07	6.52	6.64	5.78	4.9	5.09	4.37	3.77	4.17	4.38	3.51	3.54	4.17	3.46	3.51	2.92	0.63	0.7	1.03
HORVU.MOREX.r3.1HG0042940	TPM	0	0	0	0	0	0	0	0	0	0	0	0	0	0	0	0	0	0	0	0	0
HORVU.MOREX.r3.1HG0042970	TPM	0	0	0	0	0	0	0	0	0	0	0	0	0	0	0	0	0	0	0	0	0
HORVU.MOREX.r3.1HG0042990	TPM	16.72	10.52	14.69	31.34	21.31	24.02	27.62	24.92	28.32	25.17	24.3	30.82	26.32	29.08	27.16	21.32	24.07	30.37	3.35	5.32	4.19
HORVU.MOREX.r3.1HG0043000	TPM	106.1	90.92	87.57	112.45	98.06	90.27	96.17	83.53	86.18	81.53	82.92	97	87.7	81.83	89.8	71.96	75.93	97.21	20.15	28.02	24.59
HORVU.MOREX.r3.1HG0043030	TPM	0	0	0	0	0	0	0	0	0	0	0	0	0	0	0	0	0	0	0	0	0
HORVU.MOREX.r3.1HG0043060	TPM	4.55	3.9	5.26	6.55	4.63	4.51	6.22	5.83	6.51	5.54	6.02	6.74	5.77	6.28	7.45	5.04	6.01	6.99	0.97	2.34	1.92
HORVU.MOREX.r3.1HG0043100	TPM	49.61	49.93	50.81	50.66	34.85	38.56	34.02	31.53	35.97	28.97	25.02	30.75	33.01	34.07	30.96	26.82	29.15	35.05	25.39	33.21	33.22
HORVU.MOREX.r3.1HG0043170	TPM	5.93	3.96	4.72	7.04	7.47	8.65	5.18	5.95	4.36	4.19	3.7	3.82	4.4	3.36	5.12	4.34	3.26	1.45	1.05	3.35	0.62
HORVU.MOREX.r3.1HG0043190	TPM	1502.79	1365.36	1263.6	2073.02	1954.26	1605.28	1999.2	2023.24	2021.18	2033.69	1988.59	1954.84	1555.03	1491.13	1555.69	1340.7	1302.8	1351.93	401.71	742.24	535.54
HORVU.MOREX.r3.1HG0043210	TPM	0	0	0	0	0	0	0	0	0	0	0	0	0	0	0	0	0	0	0	0	0
HORVU.MOREX.r3.1HG0043220	TPM	1.88	3.26	3.75	2.3	2.73	4.24	0.99	0.93	1.7	1.69	1.36	1.74	1.62	3.29	2.11	3.13	2	2.02	4.51	5.05	2.98
HORVU.MOREX.r3.1HG0043270	TPM	0.07	0.07	0	0	0	0	0	0	0	0	0	0	0	0	0	0	0	0	0.15	0.22	0.08
HORVU.MOREX.r3.1HG0043310	TPM	0	0	0	0	0	0	0	0	0	0	0	0	0	0	0	0	0	0	0	0	0
HORVU.MOREX.r3.1HG0043320	TPM	3.43	0	0	4.52	0	0.75	5.21	1.21	3.58	0	1.6	0	0	0	0.13	0	0.62	0	0.14	0	0
HORVU.MOREX.r3.1HG0043330	TPM	0	0	0	0	0	0	0	0	0	0	0	0	0	0	0	0	0	0	0	0	0
HORVU.MOREX.r3.1HG0043350	TPM	14.08	13.2	15.61	13.14	13.77	12.25	11.5	10.81	12.33	12.91	12.53	12.88	11.7	14.42	14.23	12.34	13.51	11.24	10.16	10.61	12.79
HORVU.MOREX.r3.1HG0043410	TPM	0	0	0	0	0	0	0	0.1	0	0	0	0	0	0	0	0	0	0	0	0	0
HORVU.MOREX.r3.1HG0043450	TPM	0.84	0.27	0	0.9	0.71	1.25	0.35	0.47	0.51	0.69	0.12	0.62	0.76	0.61	0.92	1.23	1.05	1.95	0.3	0	0.46
HORVU.MOREX.r3.1HG0043520	TPM	18.38	14.35	14.52	13.14	13.16	14.16	11.1	10.2	10.69	10.25	11.15	11.01	12.33	12.1	12.32	12.43	13.37	9.26	3.6	6.3	7.91
HORVU.MOREX.r3.1HG0043530	TPM	39.62	28.32	32.86	20.87	31.85	25.56	15.67	16.76	22.61	9.57	11.15	11.05	19.74	21.18	20.6	6.89	6.73	8.28	4.41	10.09	12.41
HORVU.MOREX.r3.1HG0043570	TPM	6.58	3.88	6.64	6.26	5.74	4.42	4.71	3.98	4.46	3.35	3.67	5.02	4.14	4.55	4.62	2.83	4.05	5.93	0.93	0.86	1.15
HORVU.MOREX.r3.1HG0043590	TPM	23.19	20.11	23.15	22.14	18.71	17.45	27.37	26.23	28.2	27.52	29.9	32.26	33.98	37.38	33.82	33.13	34.21	39.89	50.67	44.15	69.85
HORVU.MOREX.r3.1HG0043600	TPM	6.83	6.22	6.25	28.33	22.81	25.79	12.08	14.39	15.24	20.56	13.86	15.39	17.52	20.1	17.89	16.44	21.34	19.56	0.99	1.51	4.15
HORVU.MOREX.r3.1HG0043620	TPM	0	0	0	0	0	0	0	0	0	0	0	0	0	0	0	0	0	0	0	0	0
HORVU.MOREX.r3.1HG0043640	TPM	37.57	30.58	31.34	49.09	36.52	38.49	29.48	28.37	32.82	26.55	21.92	25.59	22.89	25.49	23.39	16.31	19.03	29.1	8.64	12.48	15.78
HORVU.MOREX.r3.1HG0043650	TPM	0	0	0	0	0	0	0	0	0	0	0	0	0	0	0	0	0	0	0	0	0
HORVU.MOREX.r3.1HG0043670	TPM	34.39	23.86	28.87	32.85	35.41	33.52	25.16	25.67	28.68	19	16.39	17.84	17.78	19.59	19.56	15.65	13.42	14.96	11.96	14.84	13.16
HORVU.MOREX.r3.1HG0043710	TPM	28.52	16.64	19.75	38.98	27.41	28.95	31.39	28.14	33.25	28.1	27.94	31.52	29.33	28.16	28.93	24.69	25.07	26.9	6.72	10.5	9.9
HORVU.MOREX.r3.1HG0043750	TPM	0	0.06	0	0	0.05	0	0	0	0	0	0	0.06	0	0	0	0	0	0.09	0	0	0
HORVU.MOREX.r3.1HG0043790	TPM	0	0	0	0	0	0.08	0	0	0	0	0	0	0	0	0	0	0	0	0	0	0
HORVU.MOREX.r3.1HG0043800	TPM	25.14	29.53	22.23	19.03	17.92	15.66	15.46	13.01	14.53	12.6	12.98	13.92	18.67	14.15	13.12	17.57	15.22	12.22	6.38	10.2	13.68
HORVU.MOREX.r3.1HG0043850	TPM	0	0	0.26	0.17	0.34	3.39	0.34	0.22	0.12	0	0.23	0	0.36	0.24	0.22	0.11	0.34	0	0.87	0.29	0
HORVU.MOREX.r3.1HG0043860	TPM	0.9	1.17	0.88	0.38	0.25	0.24	0	0	0	0.74	0	0	0	0	0	0.24	0	0	0	0.96	0.33
HORVU.MOREX.r3.1HG0043960	TPM	0.32	0	0.32	0.41	1.77	2.5	1.08	0.68	0	0.67	0.14	0.29	0.58	0.57	1.2	1.55	0.41	0	0.58	0.35	0.7
HORVU.MOREX.r3.1HG0043980	TPM	68.98	57.31	59.51	105.26	105.45	115.63	143.86	155.55	138.79	136.6	134.85	139.68	147.31	129.32	138.49	133.24	133.75	111.84	134.74	153.65	109.09
HORVU.MOREX.r3.1HG0043990	TPM	0	0	0	0	0	0	0	0	0	0	0	0	0	0	0	0	0	0	0	0	0
HORVU.MOREX.r3.1HG0044000	TPM	21.07	19.86	17.75	16.6	16.35	16.95	15.68	14.91	16.13	15.01	17.11	15.56	13.81	14.53	17.55	13.6	13.71	13.37	17.79	18.92	24.21
HORVU.MOREX.r3.1HG0044010	TPM	0	0	0	0	0	0	0	0	0	0	0	0	0	0	0	0	0	0	0	0	0
HORVU.MOREX.r3.1HG0044070	TPM	37.45	44.15	42.53	27.93	35.21	40.22	36.55	37.13	35.19	44.83	43.42	35.9	52.85	54.96	45.84	67.63	69.34	56.79	46.68	36.22	50.02
HORVU.MOREX.r3.1HG0044080	TPM	0	0	0	0	0	0	0	0	0	0	0	0	0	0	0	0	0.12	0	0	0	0
HORVU.MOREX.r3.1HG0044090	TPM	210.67	141.58	152.94	268.12	213.97	200.96	191.56	172.67	183.71	151.87	142.18	170.58	124.68	127.08	128.48	103.41	111.64	140.65	20.37	57.35	35.44
HORVU.MOREX.r3.1HG0044100	TPM	12.85	11.91	12.91	22.44	13.22	17.13	24	22.33	24.9	21.44	24.48	28.09	25.81	25.48	27.74	24.48	22.81	32.54	5.19	8.24	7.4
HORVU.MOREX.r3.1HG0044110	TPM	0	0	0	0	0	0	0	0	0	0	0	0	0	0	0	0	0	0	0	0	0
HORVU.MOREX.r3.1HG0044150	TPM	29.18	23.63	24.47	37.02	26.88	28.19	28.68	25.46	30.22	26.01	28.33	26.9	26.29	27.1	26.52	24.2	28.6	35.62	20.65	28.07	29.85
HORVU.MOREX.r3.1HG0044200	TPM	0	0	0	0.11	0.11	0.1	0.04	0.11	0.11	0	0	0	0	0.04	0.07	0	0.07	0	0.03	0	0
HORVU.MOREX.r3.1HG0044280	TPM	0	0	0	0	0	0	0	0	0	0	0	0	0	0	0	0	0	0	0	0	0
HORVU.MOREX.r3.1HG0044290	TPM	28.21	23.15	28.4	26.04	31.89	36.36	15.94	16.75	22.43	15.2	14.34	12.78	12.9	16.18	14.15	16.13	15.39	13.95	27.98	26.27	40.2
HORVU.MOREX.r3.1HG0044310	TPM	382.29	311.21	350.42	425.6	397.36	392.72	396.9	402.37	393.41	350.2	396.89	405.07	397.62	408.54	388.64	415.17	359.4	408.89	296.54	310.52	302.09
HORVU.MOREX.r3.1HG0044360	TPM	0	0.07	0	0	0	0.09	0	0	0	0	0	0	0	0	0	0	0	0.41	0	0	0
HORVU.MOREX.r3.1HG0044370	TPM	43.91	36.7	47.84	30.56	32.03	27.24	31.9	29.32	29.33	30.14	33.38	37.98	29.01	36.87	33.03	28.95	34.87	49.89	15.38	18.21	19.3
HORVU.MOREX.r3.1HG0044380	TPM	0	0	0	0	0	0	0	0	0	0	0	0	0	0	0	0	0	0	0	0	0
HORVU.MOREX.r3.1HG0044390	TPM	0	0	0	0	0	0	0	0	0	0	0	0	0	0	0	0	0	0	0	0	0
HORVU.MOREX.r3.1HG0044400	TPM	0	0	0	0	0	0	0	0	0	0	0	0	0	0	0	0	0	0	0	0	0
HORVU.MOREX.r3.1HG0044430	TPM	18.08	15.47	17.93	14.15	14.57	15.77	16.16	15.09	17.96	17.77	17.54	16.67	15.41	16.25	16.59	18.15	21.48	20.83	17.78	16.23	23.23
HORVU.MOREX.r3.1HG0044440	TPM	0	0	0	0	0	0	0	0	0	0	0	0	0	0	0	0	0	0	0	0	0
HORVU.MOREX.r3.1HG0044470	TPM	0.32	0.08	0.12	0.82	1.05	0.56	0.17	0.37	0.25	0.17	0.1	0.21	0.18	0.04	0.03	0.26	0.2	0.17	0.03	0.09	0.31
HORVU.MOREX.r3.1HG0044490	TPM	9.52	7.15	6.31	16.15	13.34	14.29	4.71	4.53	8.27	4.24	4.69	3.37	3.38	5.2	4.46	2.53	3.48	6.49	4.04	3.76	7.37
HORVU.MOREX.r3.1HG0044500	TPM	0	0	0	0	0	0	0	0	0	0	0	0	0	0	0	0	0	0	0	0	0
HORVU.MOREX.r3.1HG0044530	TPM	60.17	66.51	69.29	48.91	71.88	89.34	53.66	57.29	46.44	64.07	58.61	53.06	75.99	87.99	74.83	110.56	91.6	66.89	278.18	192.77	188.05
HORVU.MOREX.r3.1HG0044550	TPM	0	0	0	0	0	0	0	0	0	0	0	0	0	0	0	0	0	0	0	0	0
HORVU.MOREX.r3.1HG0044570	TPM	2.3	2.67	2.35	1.35	1.65	1.27	2.42	2.22	2.17	2.46	2.47	2.58	2.4	3.12	2.87	2.93	3.07	3.25	1.08	1.52	2.06
HORVU.MOREX.r3.1HG0044610	TPM	0	0	0	0	0	0	0	0	0	0	0	0	0	0	0	0	0	0	0	0	0
HORVU.MOREX.r3.1HG0044630	TPM	0	0.28	0	0	0	0	0	0	0	0	0	0	0	0	0	0	0	0	0	0	0
HORVU.MOREX.r3.1HG0044640	TPM	6.75	7.17	6.96	11.67	7.44	9.3	15.13	15.76	16.51	12.28	17.78	18.28	24.81	20.61	23.84	20.22	16.13	19.05	2.42	1.16	1.61
HORVU.MOREX.r3.1HG0044660	TPM	1.43	1.71	1.36	0.33	1.23	0.12	0	0	0.23	0.06	0	0	0.07	0	0	0	0	0.05	0.03	0	0.04
HORVU.MOREX.r3.1HG0044670	TPM	28.29	20.62	23.06	58.35	49.76	41.95	49.53	44.5	45.7	37.71	39.72	41.11	34.75	36.79	37.18	28.89	32.14	31.53	13.35	22.08	18.61
HORVU.MOREX.r3.1HG0044700	TPM	22.86	23.35	24.33	32.81	24.28	22.19	28.04	27.64	30.52	27.23	26.96	27.61	26.52	28.09	29.19	25.44	27.19	31.72	14.53	17.62	19.84
HORVU.MOREX.r3.1HG0044710	TPM	27.95	28.72	28.05	29.21	23.06	21.74	16.54	14.26	18.09	11.51	13.04	14.12	14.1	15.71	15.64	10.33	12.08	15.86	11.03	11.92	11.71
HORVU.MOREX.r3.1HG0044750	TPM	37.99	36.65	41.28	36.1	24.06	23.01	46.03	52.08	56.55	49.33	71.94	68.76	73.33	74.24	69.78	70.2	79.42	89.42	43.72	49.29	50.87
HORVU.MOREX.r3.1HG0044770	TPM	11.84	11.26	11.91	12.94	13.89	10.59	11.74	10.8	11.82	9.77	9.85	9.86	9.6	9.45	9.53	7.36	9.85	10.45	5.5	8.79	8.29
HORVU.MOREX.r3.1HG0044790	TPM	0.45	0.28	0.24	1.58	0.77	0.99	1.18	1.22	1.27	1.45	1.21	1.71	1.11	1.18	1.58	0.9	1.17	1.73	0.07	0.15	0.11
HORVU.MOREX.r3.1HG0044800	TPM	0	0.05	0.05	0	0	0.08	0	0.17	0.05	0.04	0	0	0.09	0.18	0.08	0.12	0	0	0	0.11	0.11
HORVU.MOREX.r3.1HG0044830	TPM	0	0	0	0	0	0	0	0	0	0	0	0	0	0	0	0	0	0	0	0	0
HORVU.MOREX.r3.1HG0044840	TPM	0	0	0	0	0	0	0.11	0	0	0.11	0	0.06	0.06	0	0	0	0	0	0	0	0
HORVU.MOREX.r3.1HG0044850	TPM	30.32	33.14	33.55	33.85	23.35	30.15	40.02	39.12	44.94	34.45	41.65	38.06	38.73	42.14	41.93	43.57	38.52	51.52	44.72	51.06	49.07
HORVU.MOREX.r3.1HG0044870	TPM	0	0	0	0	0.15	0	0.01	0	0	0	0	0	0	0	0	0	0	0	0	0	0
HORVU.MOREX.r3.1HG0044890	TPM	0.1	0	0	0	0	0	0	0	0	0	0	0	0	0	0	0	0	0	0.14	0	0
HORVU.MOREX.r3.1HG0044910	TPM	0	0.13	0	0	0	0	0	0	0	0	0	0	0	0	0	0	0	0	0	0	0
HORVU.MOREX.r3.1HG0044950	TPM	0	0	0	0	0	0	0.05	0	0	0	0	0	0	0	0	0	0	0	0	0	0
HORVU.MOREX.r3.1HG0044960	TPM	0	0	0	0.02	0	0	0	0	0	0	0	0	0	0	0	0	0	0	0.01	0	0.02
HORVU.MOREX.r3.1HG0045000	TPM	0	0	0	0	0	0	0	0	0	0	0	0	0	0	0	0	0	0	0	0	0
HORVU.MOREX.r3.1HG0045030	TPM	0	0	0	0	0	0	0	0	0	0	0	0.06	0	0	0	0	0	0	0	0	0
HORVU.MOREX.r3.1HG0045040	TPM	112.03	106.02	109.11	95.32	81.18	89.92	149.35	148.99	130.69	156.27	148.33	125.45	136.43	122.04	120.12	175.18	146.07	158.84	404.5	349.12	356.74
HORVU.MOREX.r3.1HG0045060	TPM	0	0	0	0	0	0	0	0	0	0	0	0	0	0	0	0	0	0	0	0	0.14
HORVU.MOREX.r3.1HG0045070	TPM	0	0	0	0	0	0	0	0	0	0	0	0	0	0	0	0	0	0	0	0	0
HORVU.MOREX.r3.1HG0045090	TPM	0	0	0	0	0	0.08	0	0	0	0	0	0	0	0	0	0	0	0	0	0	0
HORVU.MOREX.r3.1HG0045140	TPM	0	0	0.22	0	0.16	0	0	0	0	0.12	0	0	0	0	0	0	0	0	0	0	0
HORVU.MOREX.r3.1HG0045220	TPM	0	0	0	0.12	0.05	0.02	0.02	0	0	0.02	0	0.03	0.03	0.05	0	0.1	0.1	0.04	0	0	0
HORVU.MOREX.r3.1HG0045230	TPM	0	0	0	0	0	0	0	0	0	0	0	0	0	0	0	0	0	0	0	0	0
HORVU.MOREX.r3.1HG0045350	TPM	0	0	0	0	0	0	0	0.14	0	0	0	0	0.15	0	0	0.13	0.14	0	0.12	0	0
HORVU.MOREX.r3.1HG0045360	TPM	21.74	19.27	20.6	22.71	18.21	18.62	23.78	22.74	23.69	23.5	22.61	25.51	26.39	29.76	29.01	25.18	27.17	34.05	9.31	12.54	13.19
HORVU.MOREX.r3.1HG0045370	TPM	0.22	0.11	0.32	0.78	0.42	0.63	1.15	0.92	1.25	1.28	1.44	2.25	2.44	2.08	2.5	2.11	2.17	3.31	0	0.06	0
HORVU.MOREX.r3.1HG0045390	TPM	0.1	0.05	0.05	0.36	0.23	0.23	0.45	0.49	0.89	0.63	0.79	1.11	1.56	1.4	1.45	1.04	1.32	1.26	0.01	0	0
HORVU.MOREX.r3.1HG0045440	TPM	22.96	18.89	22.42	25.76	24.91	20.15	14.25	15.88	15.76	13.12	12.95	14.19	13.61	13.03	14.85	10.91	11.32	11.42	11.77	10.15	14.53
HORVU.MOREX.r3.1HG0045470	TPM	0	0	0	0	0	0	0	0	0	0	0	0	0	0	0	0	0	0	0	0	0
HORVU.MOREX.r3.1HG0045490	TPM	20.72	19.34	20.8	26.57	26.25	29.36	20	21.71	19.92	16.33	15.97	15.13	17.13	16.69	15.91	16.25	16.26	13.93	36.75	36.89	37.54
HORVU.MOREX.r3.1HG0045510	TPM	79.71	75.01	74.28	89.17	93.29	96.16	85.68	88.47	84.05	78.51	78.99	78.44	75.04	72.29	79.83	82.07	78.12	70.69	109.05	127.89	100
HORVU.MOREX.r3.1HG0045520	TPM	0.09	0.09	0.12	0.39	0.29	0.15	0.18	0.21	0.47	0.74	0.34	0.35	0.42	0.67	0.43	0.25	0.31	0.69	0.02	0.1	0.17
HORVU.MOREX.r3.1HG0045530	TPM	0	0	0	0	0	0	0	0	0	0	0	0	0	0	0	0	0	0	0	0	0
HORVU.MOREX.r3.1HG0045540	TPM	3.58	3.36	3.68	5.26	4.38	4.41	4.65	4.07	4.54	5.01	6.75	7.12	7.13	6.62	7.19	6.16	7.55	8.43	1.32	2.05	2.67
HORVU.MOREX.r3.1HG0045570	TPM	1.6	1.56	1.36	0.51	0.34	0.49	0.5	0.67	0	0.66	0.34	0.71	0.9	0.7	0.66	0.48	0.17	0	0	0	0.22
HORVU.MOREX.r3.1HG0045660	TPM	0	0.09	0.05	0.12	0	0.99	0.04	0.12	0.25	0.15	0.04	0.17	0.08	0.37	0.27	0	0.08	0.07	0.07	0.05	0.1
HORVU.MOREX.r3.1HG0045670	TPM	0	0	0	0	0	0	0	0	0	0	0	0	0	0	0	0	0	0	0	0	0
HORVU.MOREX.r3.1HG0045720	TPM	24.63	20.15	23.44	38.54	24.01	28.69	41.93	41.67	42.59	43.44	44.51	51.5	49.41	50.9	48.4	43.15	50.51	66.68	7.25	16.68	13.57
HORVU.MOREX.r3.1HG0045730	TPM	0	0	0	0	0	0	0.09	0	0	0.09	0	0.19	0.09	0.09	0.26	0.34	0.18	0.29	0.08	0	0
HORVU.MOREX.r3.1HG0045750	TPM	3.34	2.97	2.53	3.85	3.83	2.61	1.51	1.72	1.91	1.62	1.12	1.21	0.91	1.12	1.64	0.88	0.95	1	0.8	0.99	1.26
HORVU.MOREX.r3.1HG0045770	TPM	0.33	0.16	0.16	21.41	7.24	19.02	22.75	26.77	24.92	15.07	18.68	13.88	20.3	25.38	20.7	7.25	13.92	22.97	0	0.52	0.09
HORVU.MOREX.r3.1HG0045790	TPM	0	0	0	0	0	0.08	0	0	0	0	0	0	0	0.09	0	0	0	0	0	0	0
HORVU.MOREX.r3.1HG0045800	TPM	0	0	0	0	0	0	0	0	0	0.04	0	0	0	0	0	0	0	0	0	0	0
HORVU.MOREX.r3.1HG0045830	TPM	1.13	0.97	0.97	1.66	1.24	1.16	1.26	1.52	1.44	1.82	2.14	2.03	1.68	2.61	2.24	1.83	3.04	3.25	1.87	1.63	2.12
HORVU.MOREX.r3.1HG0045860	TPM	0	0	0	0	0	0	0	0	0	0	0.06	0	0	0	0	0.06	0	0	0	0	0
HORVU.MOREX.r3.1HG0045870	TPM	117.66	102.52	112.59	95.15	94.75	69.74	58.9	57.17	64.27	46.68	50.78	53.87	49.39	50.67	53.04	40.22	43.45	59.15	27.68	38.31	33.16
HORVU.MOREX.r3.1HG0045880	TPM	0	0	0	0	0	0	0	0	0	0	0	0	0	0	0	0	0	0	0	0	0
HORVU.MOREX.r3.1HG0045890	TPM	98.75	136.3	105.79	92.22	76.19	76.08	57.32	50.66	57.03	59.54	53.85	55.27	60.37	56.19	52.45	55.85	57.93	62.45	35.78	61.14	58.55
HORVU.MOREX.r3.1HG0045900	TPM	78.51	65.01	73.31	92.79	83.41	71.7	65.44	65.61	72.55	62.12	66.28	66.92	60.98	61.88	63.55	56.74	60.45	72.82	25.16	35.62	42.66
HORVU.MOREX.r3.1HG0045940	TPM	1.02	1	1.25	0.98	0.32	1.39	0.7	0.64	0.46	0.52	0.21	0.23	0.34	0.11	0.73	1.02	0.85	0.7	1.04	0.83	0.42
HORVU.MOREX.r3.1HG0045950	TPM	9.77	8.82	10.75	14.54	11.24	12.43	9.43	8.89	12.44	9.27	9.44	11.06	10.41	11.24	11.56	9.71	10.05	13.34	3.28	3.31	5.46
HORVU.MOREX.r3.1HG0045960	TPM	0	0	0	0	0	0	0	0	0	0	0	0	0	0	0	0	0	0	0	0	0
HORVU.MOREX.r3.1HG0045970	TPM	9.6	11.34	9.03	7.65	6.9	7.74	6.64	6.48	6.66	7.8	7.71	7.86	8.64	8.12	8.6	7.73	8.55	10.68	6.22	6.23	9.37
HORVU.MOREX.r3.1HG0045980	TPM	37.21	31.44	32.08	37.38	41.38	31.04	27.38	27.95	29	27.1	27.89	27.26	24.57	21.72	24.98	23.3	23.26	22.53	19.73	30.15	30.26
HORVU.MOREX.r3.1HG0046000	TPM	7.08	8.24	6.13	5.84	6.49	7.52	5.06	5.27	5.59	5.43	3.42	5.08	3.53	4.23	4.46	3.68	3.51	2.77	1.25	3.48	2.88
HORVU.MOREX.r3.1HG0046020	TPM	113.29	211.03	149.03	53.35	55.28	54.74	28.35	28.66	33.61	33.96	29.79	35.08	25.6	28.83	27.17	25.75	29.27	29.62	29.69	38.43	42.48
HORVU.MOREX.r3.1HG0046030	TPM	4.57	3.21	5.88	6.86	5.18	5.4	6.47	6.42	6.68	5.24	7.8	7.23	6.74	7.35	7.73	5.95	5.96	8.39	3.65	3.42	4.14
HORVU.MOREX.r3.1HG0046090	TPM	0	0	0	0	0	0	0	0	0	0	0	0	0	0	0	0	0	0	0	0	0
HORVU.MOREX.r3.1HG0046120	TPM	0	0	0	0	0	0	0	0	0	0	0	0	0	0	0	0	0	0	0	0	0
HORVU.MOREX.r3.1HG0046150	TPM	66.58	22.17	24.21	167.14	114.42	120.79	78.5	70.28	78.87	88.03	83	86.32	84.11	80.65	104.04	73.04	73.06	81.13	16.79	46.57	20.07
HORVU.MOREX.r3.1HG0046160	TPM	0	0	0	0	0	0	0	0	0	0	0	0	0	0	0	0	0	0	0	0	0
HORVU.MOREX.r3.1HG0046170	TPM	1.2	1.39	0.91	1.42	0.9	1.99	2.88	3.2	2.69	3.34	4.29	3.35	6.22	5.22	4.61	7.72	6.21	4.34	3.66	7.74	10.27
HORVU.MOREX.r3.1HG0046180	TPM	70.67	83.95	76.83	57.03	51.25	51.54	27.69	28.84	32.47	31.58	30.63	28.28	28.11	29.95	26.22	30.83	28.64	41.89	43.21	46.93	59.85
HORVU.MOREX.r3.1HG0046190	TPM	91.39	130.27	143.81	15.97	12.04	24.18	10.32	12.86	12.91	13.94	9.18	9.64	19.85	14.7	13.22	14.51	15.13	12.03	1787.94	692.85	604.4
HORVU.MOREX.r3.1HG0046210	TPM	0.26	0.08	0.42	0.4	0.74	0.97	0.52	0.71	0.28	0.54	0.69	0.61	0.46	0.55	0.56	0.52	0.33	0.4	0.12	0.31	0.31
HORVU.MOREX.r3.1HG0046230	TPM	2	2.16	1.79	2.02	2.13	1.66	2.9	2.02	2.66	1.99	2.65	2.47	3.9	3.17	4.03	3.44	2.88	3.77	0.45	0.85	0.54
HORVU.MOREX.r3.1HG0046270	TPM	0	0	0	0	0	0	0	0	0	0	0	0	0	0	0	0	0	0	0	0	0
HORVU.MOREX.r3.1HG0046280	TPM	69.16	59.24	66	105.07	76.66	69.57	120.62	118.21	124.08	114.01	125.31	143.58	128.99	135.58	137.54	118.89	109.92	148.14	20.49	32.25	29.36
HORVU.MOREX.r3.1HG0046290	TPM	42.15	38.85	45.02	26.57	31.08	28.84	22.67	20.85	23.84	23.36	23.42	24.72	26.63	24.33	28.9	27.41	25.57	28.62	59.19	48.14	57.86
HORVU.MOREX.r3.1HG0046300	TPM	45.58	44.61	48.19	22.65	46.03	45.25	19.37	23.32	19.56	12.92	8.97	11.72	12.68	13.27	12.3	13.38	9.02	6.8	20.27	21.85	19.28
HORVU.MOREX.r3.1HG0046320	TPM	4.05	3.04	3.32	26.4	8.28	25.45	88.33	118.58	85.47	126.11	100.55	143.8	115.79	162.84	118.59	104.1	139.99	128.65	1.52	10.76	5.04
HORVU.MOREX.r3.1HG0046330	TPM	19.72	23.41	13.76	75.46	39.47	78.1	375.29	531.23	367.04	937.78	497.74	594.18	787.05	1131.61	738.2	927.62	1529.25	1189.55	53.26	168.49	58.64
HORVU.MOREX.r3.1HG0046370	TPM	0	0	0	0	0	0.08	0	0.16	0.09	0.16	0.16	0.17	0.18	0.09	0.24	0.08	0.16	0.41	0.14	0	0
HORVU.MOREX.r3.1HG0046400	TPM	352.91	477.99	484.4	289.09	473.63	542.86	412.58	414.85	517.65	762.05	709.41	669.19	614.83	1027.51	832.81	1068.84	825.7	1087.85	2234.11	1251.7	2239.42
HORVU.MOREX.r3.1HG0046420	TPM	16.88	10.68	11.88	33.62	21.49	24.42	24.34	21.84	25.94	22.53	17.94	24.36	19.98	21.97	21.36	14.44	18.13	26.4	6.26	9.58	9.53
HORVU.MOREX.r3.1HG0046440	TPM	0.25	0.49	0.25	1.93	0.85	1.84	0.84	0.74	0.91	0.62	0.42	0.56	1.36	1.21	0.52	3.01	0.21	0.7	0.09	0.13	0.14
HORVU.MOREX.r3.1HG0046450	TPM	0	0	0	0	0	0	0	0	0	0	0	0	0	0.1	0	0	0	0	0	0	0.13
HORVU.MOREX.r3.1HG0046460	TPM	7.72	15.11	10.13	17.24	9.9	15.15	16.58	10.06	8.96	9.99	7.75	5.54	22.23	13.56	12.41	14.95	20.89	12.93	11.1	12.83	4.29
HORVU.MOREX.r3.1HG0046470	TPM	0	0	0	0	0	0	0	0	0	0	0	0	0	0	0	0	0	0	0	0	0
HORVU.MOREX.r3.1HG0046510	TPM	45.72	42.91	45.31	74.89	65	66.74	75.95	70.7	78.4	54.87	63.32	60.42	53.01	48.33	54.63	43.92	52.87	38.24	69.69	80.04	65
HORVU.MOREX.r3.1HG0046520	TPM	4.18	3.75	4.84	7.16	5.29	7.54	8.04	6.73	7.62	8.01	8.77	9.3	9.48	9.19	9.28	9.35	8.91	10.06	2.73	7.49	5.29
HORVU.MOREX.r3.1HG0046540	TPM	0.49	0.08	0.08	2.1	3.31	9.53	1.02	1.23	1.33	0.88	0.76	0.65	1.41	0.72	1.28	1.24	1.17	0.91	0	0	0
HORVU.MOREX.r3.1HG0046550	TPM	0	0	0	0	0	0	0	0	0	0	0	0	0	0	0	0	0	0	0	0	0
HORVU.MOREX.r3.1HG0046570	TPM	0.42	0.65	0.47	0	0.15	0.49	0.5	0.3	0.16	0.25	0.1	0	0.44	0.16	0.2	0.34	0.3	0.5	0.3	0.39	0.98
HORVU.MOREX.r3.1HG0046650	TPM	2.67	0.37	0.48	11.58	7.99	14.26	4.37	3.02	3.15	3.62	2.02	1.46	2.75	1.18	1.51	2.87	2.17	1.47	0.38	1.25	2.58
HORVU.MOREX.r3.1HG0046660	TPM	0.14	0	0	0	0	0	0	0	0	0	0	0	0	0	0	0	0	0	0.1	0	0
HORVU.MOREX.r3.1HG0046690	TPM	0	0	0	0	0	0	0	0.12	0	0	0	0	0	0	0	0	0.12	0	0	0	0
HORVU.MOREX.r3.1HG0046700	TPM	0	0	0	0	0	0	0	0	0	0	0	0	0	0	0	0	0	0	0	0	0
HORVU.MOREX.r3.1HG0046710	TPM	29.76	17.14	25.8	39.53	35.53	30.65	30.47	28.94	30.02	26.71	26.4	28.88	24.84	25.81	25.52	21.15	23.25	29.4	5.07	11.38	8.86
HORVU.MOREX.r3.1HG0046760	TPM	0	0.22	0	0	0.19	0.09	0	0	0	0	0	0	0	0.1	0	0	0	0	0	0	0
HORVU.MOREX.r3.1HG0046770	TPM	12.59	7.78	10.38	21.59	17.28	15.56	24.04	22.26	24.2	18.91	21.27	23.49	17.57	19.24	18.59	13.07	17.62	19.56	3.77	6.71	8.48
HORVU.MOREX.r3.1HG0046780	TPM	28.07	25.79	26.15	18.38	22.61	24.54	22.87	22.06	24.36	31.73	32.65	33.55	40.02	40.34	39.66	39.5	39.57	36.01	87.14	64.01	69.39
HORVU.MOREX.r3.1HG0046810	TPM	0	0	0	0	0	0	0	0	0	0	0	0	0	0	0	0	0	0	0	0	0
HORVU.MOREX.r3.1HG0046830	TPM	14.52	11.99	12.95	13.04	13.25	10.29	10.71	9.66	10.22	9.55	9.56	10.44	9.74	10.2	10.51	10.19	10.17	8.78	5.95	7.3	5.41
HORVU.MOREX.r3.1HG0046850	TPM	9.41	11	9.75	13.42	11.31	13.69	17.86	17.4	17.86	20.15	17.61	16.63	20.84	18.29	16.97	21.3	21.29	13.78	28.24	38.42	23.12
HORVU.MOREX.r3.1HG0046880	TPM	0	0	0	0	0	0	0	0	0	0	0	0	0	0	0	0	0	0	0	0	0
HORVU.MOREX.r3.1HG0046890	TPM	0	0.08	0	0.11	0.36	1.32	0.14	0.21	0.08	0.14	0.07	0.15	0.23	0.07	0.28	0.2	0.43	0	0.06	0.28	0.19
HORVU.MOREX.r3.1HG0046900	TPM	15.36	15.92	15.17	19.7	14.72	13.4	13.64	13.05	14.81	11.29	15.08	13.75	12.12	12.35	16.95	11.67	12.93	13.61	7.94	11.87	10.86
HORVU.MOREX.r3.1HG0046920	TPM	60.02	58.71	62.58	45.08	37.41	34.78	33.09	29.28	34.64	26.75	31.05	31.76	31.76	34.26	32.57	28.15	31.55	43.05	23.2	30.05	37.87
HORVU.MOREX.r3.1HG0046940	TPM	0	0	0	0	0	0	0	0	0	0	0	0	0	0	0	0	0	0	0	0	0
HORVU.MOREX.r3.1HG0046960	TPM	0.17	0.22	0.38	0	0	0	0.14	0.19	0.15	0.24	0.24	0.2	0.15	0.05	0.24	0.09	0.65	0.08	0.85	1.36	0.75
HORVU.MOREX.r3.1HG0047060	TPM	0.81	0.87	0.4	12.07	6.36	13.85	50.99	52.33	42.14	52.92	70.09	71.59	101.65	101.92	107.76	159.7	110.66	83.18	0.65	5.24	2.08
HORVU.MOREX.r3.1HG0047080	TPM	33.53	38.6	36.62	50.69	43.92	38.64	44.74	40.53	45.68	43.48	46.87	43.58	41.38	34.02	33.7	35.36	43.45	51.23	15.43	22.41	20.31
HORVU.MOREX.r3.1HG0047090	TPM	0	0	0	0	0	0	0	0	0	0	0	0	0	0	0	0	0	0	0	0	0
HORVU.MOREX.r3.1HG0047100	TPM	17.8	19.66	19.78	9.05	7.05	7.53	18.88	18.58	19.32	19.96	23.13	19.27	24.04	23.85	22.05	20.73	24.39	23.36	50.47	50.45	38.22
HORVU.MOREX.r3.1HG0047110	TPM	6.11	5.69	4.3	11.84	4.49	11.1	3.89	5.82	5.25	2.92	2.97	2.26	2.16	2.29	2.37	1.52	1.77	1.21	4.8	15.78	5.04
HORVU.MOREX.r3.1HG0047120	TPM	4.12	2.66	2.9	19.38	9.24	13.56	33.65	33.07	33.09	34.76	42.28	36.16	40.87	34.09	40.85	37.15	35.3	33.18	3.26	11.38	7.17
HORVU.MOREX.r3.1HG0047130	TPM	62.67	65.11	70.96	49.73	42.3	42.17	36.9	34.09	35.79	41.21	38.72	41.92	43.06	43.82	43.55	44.24	46.44	52.09	16.13	29.33	25.45
HORVU.MOREX.r3.1HG0047150	TPM	0.72	0.55	0.49	0.72	0.53	0.51	0.23	0.21	0.59	0.26	0.45	0.31	0.34	0.3	0.31	0.25	0.39	0.48	0.18	0.34	0.55
HORVU.MOREX.r3.1HG0047200	TPM	28.77	21.62	22.83	40.53	33.18	29.56	33.73	31.85	34.26	34.98	35.41	37.48	34.54	36.3	35.2	34.76	37.02	41.15	16.56	24.32	21.94
HORVU.MOREX.r3.1HG0047240	TPM	0	0	0	0	0	0	0	0	0	0	0	0	0	0	0	0	0	0	0	0	0
HORVU.MOREX.r3.1HG0047250	TPM	12.73	13.75	14.33	9.22	10.81	10.81	11.97	11.27	11.16	13.74	13.74	14.14	13.91	14.98	14.87	14.79	15	17.6	9.15	9.93	10.76
HORVU.MOREX.r3.1HG0047260	TPM	0	0	0	0	0	0	0	0	0	0	0	0	0	0	0	0	0	0	0	0	0
HORVU.MOREX.r3.1HG0047280	TPM	0	0	0	0	0	0	0	0	0	0	0	0	0	0	0	0	0	0	0	0	0
HORVU.MOREX.r3.1HG0047290	TPM	4.72	0.99	1.58	60.21	24.9	43.35	48.97	50.7	42.2	30.41	33.44	41.38	27	23.8	30.82	20.93	14.83	12.68	0.5	2.13	0.5
HORVU.MOREX.r3.1HG0047310	TPM	0	0	0	0	0	0	0	0	0	0	0	0	0	0	0	0	0	0	0	0	0
HORVU.MOREX.r3.1HG0047320	TPM	36.49	52.38	48.75	18.51	23.37	27.22	10.15	11.83	10.32	12.49	10.06	12.45	10.9	10.81	10.87	12.66	10.44	8.13	49.35	38.37	42.21
HORVU.MOREX.r3.1HG0047430	TPM	0	0	0.18	0	0.08	0.3	0.15	0.16	0	0	0	0.08	0	0	0	0	0.08	0	0.07	0.1	0
HORVU.MOREX.r3.1HG0047440	TPM	6.15	6.73	6.08	0.94	2.6	2.2	0	0.51	0	0	0.19	0.22	0.61	0	0	0.78	0	0	0.81	0	0
HORVU.MOREX.r3.1HG0047460	TPM	0	0.02	0	0	0.05	0.03	0.14	0.19	0.17	0.39	0.27	0.64	0.43	0.9	0.39	0.23	0.48	0.77	0	0	0.06
HORVU.MOREX.r3.1HG0047470	TPM	17.1	14.12	14.1	18.26	19.06	17.56	17.25	16.71	17.47	16.7	20	19.28	23.43	22.68	21.34	23.41	22.41	20.59	18.64	18.93	18.52
HORVU.MOREX.r3.1HG0047480	TPM	32.75	36.77	27.02	14.74	18.08	16	4.35	5.58	8.7	5.45	6.15	6.3	6.62	6.51	6.62	5.23	4.56	3.84	4.42	4.62	8.46
HORVU.MOREX.r3.1HG0047500	TPM	23.69	26.2	26.24	34.82	13.47	19.42	143.58	152.15	149.98	234.73	308.96	264.84	179.17	173.16	178.79	126.64	249.62	254.13	123.29	167.83	148.19
HORVU.MOREX.r3.1HG0047510	TPM	2.02	1.39	0.87	2.87	2.14	3.52	1.3	1.81	1.28	0.92	0.88	0.73	1.55	1.37	1.04	1.31	1.44	0.31	0.86	1.2	0.89
HORVU.MOREX.r3.1HG0047580	TPM	83.93	79.71	83.63	76.64	66.09	67.26	70.96	62.3	69.89	72.12	72.26	73.27	79.64	74.16	72.02	69.02	78.99	85.85	45.6	56.51	65.14
HORVU.MOREX.r3.1HG0047590	TPM	164.09	157.61	171.99	149.35	144.21	116.32	138.4	117.9	129.92	139.85	147.13	138.2	124.85	137.04	122.85	139.17	146.44	170.83	74.01	118.7	104.24
HORVU.MOREX.r3.1HG0047600	TPM	19.33	14	16.16	21.45	22.99	19.87	17.14	16.13	16.55	14.32	12.92	16.31	13.56	12.9	15.59	13.18	12.93	13.37	5.45	9.68	7.97
HORVU.MOREX.r3.1HG0047620	TPM	0	0	0	0	0	0	0	0	0	0	0	0	0	0	0	0	0	0	0	0	0
HORVU.MOREX.r3.1HG0047660	TPM	128.63	73.72	86.17	94.3	103.44	87.85	82.82	75.67	76.21	93.48	77.84	77.69	89.14	90.94	86.86	110.49	99.14	80.36	81.34	84.78	104.43
HORVU.MOREX.r3.1HG0047670	TPM	0	0	0	0.11	0.07	0.11	0.52	0.15	0.28	0.33	0.48	0.51	0.72	0.51	0.51	1.38	0.74	0.37	0	0.05	0.1
HORVU.MOREX.r3.1HG0047680	TPM	0	0	0	0	0	0	0	0	0	0	0	0	0.21	0	0.09	0	0	0	0	0	0.13
HORVU.MOREX.r3.1HG0047710	TPM	4.99	5.02	4.76	8.7	4.06	6.24	18.97	18.96	19.66	19.93	28.87	26.97	30.48	31.2	30.84	41.17	30.85	51.77	4.84	5.68	5.25
HORVU.MOREX.r3.1HG0047720	TPM	38.94	32.59	38.46	34	35.58	28.86	21.24	22.04	23.97	20.06	19.98	20.34	19.99	19.22	20.04	18.91	18.32	21.98	24.22	27.75	35.27
HORVU.MOREX.r3.1HG0047780	TPM	131.12	133.19	124.13	100.44	115.43	107.44	79.55	80.69	92.03	88.12	83.67	81.65	83.61	67.13	81.32	92.47	83.35	57.49	119	114.82	106.78
HORVU.MOREX.r3.1HG0047850	TPM	13.87	16.92	22.05	12.24	14.38	11.76	13.55	12.44	13.97	11.59	14.37	16.24	8.83	15.87	12.39	11.04	14.65	10.19	18.83	10.92	14.18
HORVU.MOREX.r3.1HG0047910	TPM	1.46	0.62	0.69	0.25	0.8	0.71	0.33	0.66	0.28	0.36	0.4	0.07	0.36	0.21	0.42	0.22	0.26	0.11	0.66	1.19	2.28
HORVU.MOREX.r3.1HG0047950	TPM	0	0	0	0	0	0	0	0	0	0	0	0	0	0	0	0	0	0	0	0	0
HORVU.MOREX.r3.1HG0047970	TPM	0	0	0	0	0	0	0	0	0	0	0	0	0	0	0	0	0	0	0	0	0
HORVU.MOREX.r3.1HG0047980	TPM	48.63	44.34	42.8	51.64	48.1	43.32	54.94	49.85	52.59	62.66	70.68	70.93	71	75.04	76.97	74.03	74	84.51	22.33	35.65	28.23
HORVU.MOREX.r3.1HG0048010	TPM	48.64	32.22	46.96	43.23	49.23	52.19	49.02	45.28	48.81	52.73	50.62	51.39	47.85	49.9	46.73	50.56	49.92	55.52	29.16	32.78	42.96
HORVU.MOREX.r3.1HG0048030	TPM	314.79	265.13	282.79	363.26	340.03	328.62	468.44	481.36	460.17	514.91	528.89	480.47	478.82	453.38	472.18	508.69	518.75	515.47	432.21	616.9	631.51
HORVU.MOREX.r3.1HG0048040	TPM	51.1	48.71	46.17	44.99	40.97	38.08	48.17	46.07	48.16	69.71	72.65	68.39	62.54	63.08	62.86	64.57	74.67	80.65	54.68	69.06	80.06
HORVU.MOREX.r3.1HG0048060	TPM	3.58	1.74	3.16	3.57	4.97	2.72	3.25	1.87	3.52	1.56	3.46	2.57	1.51	2.34	2.57	1.96	2.33	1.86	3.06	3.23	3.52
HORVU.MOREX.r3.1HG0048070	TPM	9.83	7.96	9.44	8.78	8.85	6.07	9.9	7.88	10.49	9.82	8.47	8.85	9.59	9.37	10.29	7.39	8.71	10.75	3.7	5.35	4.84
HORVU.MOREX.r3.1HG0048080	TPM	0.11	0	0.1	0.67	1.07	1.3	3.13	3.26	2.4	1	1.2	1.37	2.77	3.93	3.07	1.25	1.57	1.46	0	0.19	0
HORVU.MOREX.r3.1HG0048090	TPM	0.09	0.04	0	0.07	0.11	0.32	0.56	0.5	0.43	0.09	0.05	0.2	0.36	0.77	0.94	0.67	0.1	0.27	0.03	0	0
HORVU.MOREX.r3.1HG0048100	TPM	37.72	38.79	28.9	81.21	44.41	53.85	116.85	111.47	106.94	103.66	106.17	121.19	107.9	90.33	107.59	82.66	84.4	82.18	7.8	15.14	9.62
HORVU.MOREX.r3.1HG0048110	TPM	0	0	0	0	0.07	0	0	0.13	0	0	0	0.12	0	0.19	0.04	0	0.15	0.18	0	0	0.43
HORVU.MOREX.r3.1HG0048120	TPM	0	0	0	0	0	0	0	0.1	0	0	0.1	0	0.18	0	0	0.11	0	0	0	0	0.29
HORVU.MOREX.r3.1HG0048140	TPM	0	0	0	0	0	0	0.13	0.18	0	0.37	0	0	0.36	0	0	0.2	0	0.21	0	0.16	0.27
HORVU.MOREX.r3.1HG0048180	TPM	0	0	0	0	0	0	0	0	0	0	0	0	0	0	0	0	0	0	0	0	0
HORVU.MOREX.r3.1HG0048210	TPM	0	0	0	0	0	0	0	0	0	0	0	0	0	0	0	0	0	0	0	0	0
HORVU.MOREX.r3.1HG0048240	TPM	0	0	0	0	0	0	0	0	0	0	0	0	0	0	0	0	0	0	0	0	0
HORVU.MOREX.r3.1HG0048320	TPM	0	0	0	0	0	0	0	0	0	0	0	0	0	0	0	0	0	0	0	0	0.06
HORVU.MOREX.r3.1HG0048360	TPM	0	0	0	0	0	0	0	0	0	0	0	0	0	0	0	0	0	0	0	0	0
HORVU.MOREX.r3.1HG0048400	TPM	92.29	67.71	85.65	122.55	111.58	97.9	91.88	84.03	89.13	63.22	73.73	81.28	66.49	69.55	66.29	50.29	61.52	74.5	26.37	45.49	46.34
HORVU.MOREX.r3.1HG0048410	TPM	9.62	7.82	7.96	14.47	10.43	10.88	12.2	12.58	14.51	12.27	14.24	13.83	17	15.12	16.51	14.43	12.67	12.73	8.77	10.09	10.28
HORVU.MOREX.r3.1HG0048520	TPM	0.83	0.8	0	0	0	0	16.47	11.74	4.84	23.14	32.22	27.06	16.02	12.27	9.5	26.3	27.25	14.82	2.68	7.06	25.03
HORVU.MOREX.r3.1HG0048530	TPM	0	0	0	0	0	0	0	0	0	0	0	0	0	0	0	0	0	0	0	0	0
HORVU.MOREX.r3.1HG0048590	TPM	0.84	0.78	0.95	1.03	0.59	0.31	0.75	0.61	1.01	0.55	0.73	0.89	0.82	1.04	0.49	0.67	0.76	1.26	0.76	0.75	42.16
HORVU.MOREX.r3.1HG0048670	TPM	0	0	0	0	0	0	0	0	0	0	0	0	0	0	0	0	0	0	0	0	0
HORVU.MOREX.r3.1HG0048740	TPM	0	0	0	0	0	0	0	0	0	0	0	0	0	0	0	0	0	0	0	0	0
HORVU.MOREX.r3.1HG0048770	TPM	0	0	0	0	0	0	0	0	0	0	0	0	0	0	0	0	0	0	0	0	0
HORVU.MOREX.r3.1HG0048790	TPM	0	0	0	0	0	0	0	0	0	0	0	0	0	0	0	0	0	0	0	0	0
HORVU.MOREX.r3.1HG0048800	TPM	16.86	16.24	16.05	18.27	14.87	17.22	19.89	17.22	18.06	19.11	20.11	24.85	20.17	21.32	23	16.57	17.71	21.85	1.17	2.68	1.96
HORVU.MOREX.r3.1HG0048820	TPM	0	0	0	0	0	0	0	0	0	0	0.09	0	0	0.09	0	0	0	0	0	0	0
HORVU.MOREX.r3.1HG0048830	TPM	0	0	0	0	0	0	0	0	0	0	0	0	0	0	0	0	0	0	0	0	0
HORVU.MOREX.r3.1HG0048840	TPM	0.31	1.23	0	1.2	0.26	3.06	3.92	5.52	4.25	9.06	6.86	8.35	11.62	19.23	13.17	11.51	9.72	16.1	3.63	10.09	0.34
HORVU.MOREX.r3.1HG0048850	TPM	0.77	1.13	0.8	0.37	0.45	0.51	0.24	0.08	0.3	0.04	0.08	0.21	0.22	0.13	0.24	0.23	0.12	0.27	0.45	1.4	0.94
HORVU.MOREX.r3.1HG0048880	TPM	6.51	4.11	4.1	36.17	28.43	31.92	145.14	128.7	118.25	139.7	163.86	150.93	311.02	246.2	258.75	352.07	302.96	284.75	4.14	6.56	5.2
HORVU.MOREX.r3.1HG0048890	TPM	39.38	39.7	40.7	42.94	41.36	35.38	34.68	31.36	35.48	36.59	33.44	31.54	35.64	32.53	35.51	38.06	34.82	31.07	25.04	38.47	41.06
HORVU.MOREX.r3.1HG0048900	TPM	0.09	0	0	0	0	0	0.64	0	0.45	1.62	1	0.56	0.22	0	0.1	0.67	1.72	1.97	0.63	0	0
HORVU.MOREX.r3.1HG0048910	TPM	12.97	9.99	10.75	12.15	7.42	10.45	7	10.96	10.99	6.77	11.07	9.55	10.68	9.65	10.99	11.19	9.38	7.15	6.67	6.75	18.36
HORVU.MOREX.r3.1HG0048920	TPM	0	0	0	0	0	0	0	0	0	0	0	0	0	0	0.14	0	0	0	0	0	0
HORVU.MOREX.r3.1HG0048930	TPM	0	0	0	0	0.21	0	0	0.1	0.27	0	0	0	0	0.23	0	0	0	0	0	0	0
HORVU.MOREX.r3.1HG0048940	TPM	14.01	19.4	15.01	14.08	14.11	13.86	14.63	12.26	14.74	14.44	13.51	15.2	14.41	17.8	17.64	15.83	16.16	20.27	11.98	12.43	26.74
HORVU.MOREX.r3.1HG0048990	TPM	10.99	12.72	15.85	10.11	8.48	7.43	9.58	8.49	10.51	10.32	10.72	10.88	10.42	13.18	13.07	11.45	14.8	18.02	13.95	14.02	15.24
HORVU.MOREX.r3.1HG0049000	TPM	0	0	0	0	0	0	0	0	0	0	0	0	0	0	0	0	0	0	0	0	0
HORVU.MOREX.r3.1HG0049040	TPM	6.67	9.16	6.44	17.96	8.03	21.55	247.63	284.63	231.43	356.91	319.85	324.74	396.33	326.16	290.1	451.02	542.15	482.79	296.01	284.14	343.84
HORVU.MOREX.r3.1HG0049050	TPM	9.23	6.5	7.68	5.49	6.02	4.86	4.44	4.15	2.54	2.67	3.25	2.65	2.7	2.21	2.66	1.88	2.53	2.4	0.79	2.49	2.7
HORVU.MOREX.r3.1HG0049060	TPM	44.42	59.27	44.74	69.42	62.52	86.56	39.74	37.28	47.72	44.55	42.06	42.34	41.68	50.33	38.92	42.04	43.45	61.71	26.03	47.34	42.85
HORVU.MOREX.r3.1HG0049110	TPM	0.99	3.57	1.3	1.25	0.58	1.39	0.82	0.82	0.96	0.79	0.79	1.67	1	0.82	1.13	0.46	0.97	1.15	0.13	0.25	0.7
HORVU.MOREX.r3.1HG0049130	TPM	9.93	7.75	7.09	5.99	6.17	6.04	6.59	5.98	5.09	5.92	6.77	6.62	6.66	6.18	6.57	5.62	7	8.56	1.95	2.9	2.21
HORVU.MOREX.r3.1HG0049140	TPM	35.67	43.33	42.32	18.8	22.13	26.09	15.74	15.04	16.46	15.57	15.58	13.76	18.81	20.2	18.84	19.27	19.03	16.41	35.04	34.52	36.68
HORVU.MOREX.r3.1HG0049150	TPM	17.54	14.63	16.53	26.17	24.95	23.88	30.84	28.77	30.04	30.3	29.02	27.84	27.71	26.6	26.57	23.68	22.22	20.75	12.23	21.15	22.7
HORVU.MOREX.r3.1HG0049170	TPM	0.28	0	0.55	0.36	0.24	0.69	0.94	0.47	0	0.23	0.47	0	0.77	0.74	0.46	2.25	0.71	1.57	0	0	0
HORVU.MOREX.r3.1HG0049180	TPM	27.82	21.51	24.47	46.45	40.29	35.75	37.93	37.12	39.47	34.04	32.48	34.49	29.94	31.05	32.13	27.38	30.56	42.77	21.03	24.69	25.03
HORVU.MOREX.r3.1HG0049190	TPM	7.66	7.08	5.82	6.52	8.76	10.4	2.93	2.58	2.15	1.85	1.86	2.04	1.79	1.02	1.47	1.64	1.38	1.06	0.14	0.64	0.38
HORVU.MOREX.r3.1HG0049200	TPM	13.38	10.96	12.88	7.63	8.98	10.82	5.16	5.29	5.99	4.99	4.74	4.7	5.29	5.11	4.82	4.99	5.14	3.81	11.4	9.37	15.99
HORVU.MOREX.r3.1HG0049220	TPM	3.6	1.02	1.53	5.83	6.29	8.51	4.66	3.63	3.78	2.28	1.57	2.91	2.97	2.75	3.44	2.56	1.56	1.25	1.35	1.04	2.69
HORVU.MOREX.r3.1HG0049250	TPM	0	0	0	0	0	0	0	0	0	0	0	0	0	0	0	0	0	0	0	0	0
HORVU.MOREX.r3.1HG0049270	TPM	0	0	0	0	0	0	0	0	0	0	0	0	0	0	0	0	0.01	0	0	0	0
HORVU.MOREX.r3.1HG0049340	TPM	265.31	270	277.76	192.06	173.56	162.72	157.24	150.75	168.51	159.61	165.91	165.34	176.48	190.7	194.63	186.1	174.1	195.53	108.36	98.74	127.02
HORVU.MOREX.r3.1HG0049370	TPM	0	0	0	0	0	0	0	0	0	0	0	0	0	0	0	0	0	0	0	0	0
HORVU.MOREX.r3.1HG0049390	TPM	0	0.03	0	0.03	0	0	0	0	0	0	0	0	0	0	0.02	0	0	1.07	0	0	0
HORVU.MOREX.r3.1HG0049400	TPM	0	0	0	0	0	0	0	0	0	0	0	0	0	0	0	0	0	0	0	0	0
HORVU.MOREX.r3.1HG0049410	TPM	23.97	24.95	20.82	25.47	28.88	45.95	17.98	20.56	18.74	13.01	10.48	10.49	14.18	15.08	15.73	16.51	10.63	11.72	3.62	6.42	5.21
HORVU.MOREX.r3.1HG0049430	TPM	0	0	0	0	0	0	0	0	0	0	0	0	0	0	0	0	0	0	0	0	0
HORVU.MOREX.r3.1HG0049440	TPM	0	0	0	0	0	0	0	0	0	0	0	0	0	0	0	0	0	0	0	0	0
HORVU.MOREX.r3.1HG0049450	TPM	17.55	33.76	20.83	7.47	11.67	14.24	6.15	5.12	4.54	3.86	2.57	3.07	7.72	5.87	4.94	7.32	5.9	3.87	6.18	4.72	4.03
HORVU.MOREX.r3.1HG0049460	TPM	25.11	22.9	26.74	33.75	22.51	23.21	41.07	37.64	47.03	38.83	41.19	37.76	44.04	42.13	47.37	41.02	41.9	50.19	20.25	27.4	45.5
HORVU.MOREX.r3.1HG0049480	TPM	7.3	5.01	6.07	8.26	7.68	8.22	3.43	2.8	3.52	1.43	1.16	1.46	2.81	2	2.78	3.04	2.6	2.8	0.23	0.38	0.04
HORVU.MOREX.r3.1HG0049570	TPM	0	0	0	0	0	0	0	0	0	0	0	0	0	0	0	0	0	0	0	0	0
HORVU.MOREX.r3.1HG0049580	TPM	44.18	38.44	37.88	43.96	37.69	43.67	28.9	30.91	28.3	28.58	25.1	33.88	29.59	28.96	24.99	34.35	29.4	25.03	12.02	18.38	22.05
HORVU.MOREX.r3.1HG0049590	TPM	0	0	0	0	0	0	0	0	0	0	0	0	0	0	0	0	0	0	0	0	0
HORVU.MOREX.r3.1HG0049600	TPM	24.91	10.94	14.06	39.66	24.43	27.75	33.48	28.27	30.06	30.4	27.53	35.23	27.6	28.67	27.64	24.46	26.88	39.16	2.86	8.25	4.78
HORVU.MOREX.r3.1HG0049610	TPM	69.94	35.45	44.26	67.44	66.4	64.36	50.08	44.81	48.82	40.21	41.08	41.02	42.49	37.72	42.46	40.45	35.6	39.33	23.61	24.65	24.81
HORVU.MOREX.r3.1HG0049620	TPM	3.82	2.89	2.2	10.04	6.73	9.41	20.41	20.6	17.67	12.3	17.28	15.49	17.74	16.59	19.68	17.34	16.11	16.89	2.19	2.92	1.95
HORVU.MOREX.r3.1HG0049650	TPM	0	0	0	0	0.03	0.05	0	0	0	0.03	0.03	0	0	0	0.08	0	0.03	0	0.05	0.07	0
HORVU.MOREX.r3.1HG0049700	TPM	7.9	9.2	9.97	6.77	4.66	4.78	7.58	6.21	7.48	9.61	6.95	12.9	8.73	10.75	11.01	9.66	12.28	18.71	1.3	1.69	4.14
HORVU.MOREX.r3.1HG0049760	TPM	27.42	24.34	24.86	45.75	34.57	41.36	45.91	44	48.73	41.74	46.47	43.51	41.97	43.66	43.5	39.26	33.56	37.01	12.83	19.07	18.52
HORVU.MOREX.r3.1HG0049770	TPM	36.88	33.13	35.43	65.59	47.58	53.11	80.06	74.24	77.75	82.34	84.58	87.28	90.26	93.07	86.81	77.75	90.78	101.36	42.18	44.4	52.59
HORVU.MOREX.r3.1HG0049840	TPM	2.78	2.39	3.51	6.25	3.65	5.62	5.49	4.73	5.12	4.83	4.51	5.71	7.07	4.72	4.39	4.03	5.33	4.55	0.5	1.57	1.65
[truncated: 33,827 more rows]
